# Supplementary material
Source: publisher figshare collection journal article supplement (https://acs.figshare.com/ndownloader/files/5490767)
Supplement: Supplementary file 1 [file 5490767]

data_3b

_audit_creation_method            SHELXL-2014
_chemical_name_systematic
;
 ?
;
_chemical_name_common             ?
_chemical_melting_point           ?
_chemical_formula_moiety          ?
_chemical_formula_sum
 'C35 H22'
_chemical_formula_weight          442.52

loop_
 _atom_type_symbol
 _atom_type_description
 _atom_type_scat_dispersion_real
 _atom_type_scat_dispersion_imag
 _atom_type_scat_source
 'C'  'C'   0.0033   0.0016
 'International Tables Vol C Tables 4.2.6.8 and 6.1.1.4'
 'H'  'H'   0.0000   0.0000
 'International Tables Vol C Tables 4.2.6.8 and 6.1.1.4'

_space_group_crystal_system       monoclinic
_space_group_IT_number            14
_space_group_name_H-M_alt         'P 21/c'
_space_group_name_Hall            '-P 2ybc'

_shelx_space_group_comment
;
The symmetry employed for this shelxl refinement is uniquely defined
by the following loop, which should always be used as a source of
symmetry information in preference to the above space-group names.
They are only intended as comments.
;

loop_
 _space_group_symop_operation_xyz
 'x, y, z'
 '-x, y+1/2, -z+1/2'
 '-x, -y, -z'
 'x, -y-1/2, z-1/2'

_cell_length_a                    12.558(4)
_cell_length_b                    14.180(4)
_cell_length_c                    26.385(8)
_cell_angle_alpha                 90
_cell_angle_beta                  102.720(5)
_cell_angle_gamma                 90
_cell_volume                      4583(2)
_cell_formula_units_Z             8
_cell_measurement_temperature     93

_cell_measurement_reflns_used     11764

_cell_measurement_theta_min       2.5

_cell_measurement_theta_max       31.7


_exptl_crystal_description        Platelet

_exptl_crystal_colour             Colorless

_exptl_crystal_density_meas       ?
_exptl_crystal_density_method     ?
_exptl_crystal_density_diffrn     1.283
_exptl_crystal_F_000              1856
_exptl_transmission_factor_min    ?
_exptl_transmission_factor_max    ?
_exptl_crystal_size_max           0.500
_exptl_crystal_size_mid           0.500
_exptl_crystal_size_min           0.050
_exptl_absorpt_coefficient_mu     0.073
_shelx_estimated_absorpt_T_min    0.965
_shelx_estimated_absorpt_T_max    0.996
_exptl_absorpt_correction_type    Multi-scan

_exptl_absorpt_correction_T_min   0.873

_exptl_absorpt_correction_T_max   1.000

_exptl_absorpt_process_details    'Jacobson, R. (1998) Private communicatio'


_exptl_special_details
;
Rigaku CrystalClear-SM Expert 2.0 r3
;

_diffrn_ambient_temperature       93(2)
_diffrn_radiation_wavelength      0.71075
_diffrn_radiation_type            MoK\a
_diffrn_source                    'Sealed Tube'
_diffrn_measurement_device_type   'Rigaku Saturn724 CCD'

_diffrn_measurement_method        'profile data from \w-scans'

_diffrn_detector_area_resol_mean  28.5714

_diffrn_reflns_number             72605
_diffrn_reflns_av_unetI/netI      0.0528
_diffrn_reflns_av_R_equivalents   0.0874
_diffrn_reflns_limit_h_min        -16
_diffrn_reflns_limit_h_max        16
_diffrn_reflns_limit_k_min        -18
_diffrn_reflns_limit_k_max        18
_diffrn_reflns_limit_l_min        -34
_diffrn_reflns_limit_l_max        34
_diffrn_reflns_theta_min          2.456
_diffrn_reflns_theta_max          27.499
_diffrn_reflns_theta_full         25.242
_diffrn_measured_fraction_theta_max   0.998
_diffrn_measured_fraction_theta_full  0.997
_diffrn_reflns_Laue_measured_fraction_max    0.998
_diffrn_reflns_Laue_measured_fraction_full   0.997
_diffrn_reflns_point_group_measured_fraction_max   0.998
_diffrn_reflns_point_group_measured_fraction_full  0.997
_reflns_number_total              10523
_reflns_number_gt                 9028
_reflns_threshold_expression      'I > 2\s(I)'
_reflns_Friedel_coverage          0.000
_reflns_Friedel_fraction_max      .
_reflns_Friedel_fraction_full     .

_reflns_special_details
;
 Reflections were merged by SHELXL according to the crystal
 class for the calculation of statistics and refinement.

 _reflns_Friedel_fraction is defined as the number of unique
 Friedel pairs measured divided by the number that would be
 possible theoretically, ignoring centric projections and
 systematic absences.
;

_computing_data_collection
;
Rigaku CrystalClear-SM Expert 2.0 r3
;
_computing_cell_refinement
;
Rigaku CrystalClear-SM Expert 2.0 r3
;
_computing_data_reduction
;
Rigaku CrystalClear-SM Expert 2.0 r3
;
_computing_structure_solution     'SHELXL-2014/7 (Sheldrick, 2014)'

_computing_structure_refinement   'SHELXL-2014 (Sheldrick, 2014)'
_computing_molecular_graphics 'Yadokari-XG 2009 (Wakita Nemoto et al., 2009)'

_computing_publication_material
;Yadokari-XG 2009 (Wakita,Nemoto et al., 2009)
;


_refine_special_details
;
 ?
;
_refine_ls_structure_factor_coef  Fsqd
_refine_ls_matrix_type            full
_refine_ls_weighting_scheme       calc
_refine_ls_weighting_details
'w=1/[\s^2^(Fo^2^)+(0.0434P)^2^+1.9380P] where P=(Fo^2^+2Fc^2^)/3'
_atom_sites_solution_primary      ?
_atom_sites_solution_secondary    ?
_atom_sites_solution_hydrogens    geom
_refine_ls_hydrogen_treatment     constr

_refine_ls_extinction_method      none
_refine_ls_extinction_coef        .
_refine_ls_number_reflns          10523
_refine_ls_number_parameters      631
_refine_ls_number_restraints      0
_refine_ls_R_factor_all           0.0985
_refine_ls_R_factor_gt            0.0817
_refine_ls_wR_factor_ref          0.1540
_refine_ls_wR_factor_gt           0.1464
_refine_ls_goodness_of_fit_ref    1.257
_refine_ls_restrained_S_all       1.257
_refine_ls_shift/su_max           0.000
_refine_ls_shift/su_mean          0.000

loop_
 _atom_site_label
 _atom_site_type_symbol
 _atom_site_fract_x
 _atom_site_fract_y
 _atom_site_fract_z
 _atom_site_U_iso_or_equiv
 _atom_site_adp_type
 _atom_site_occupancy
 _atom_site_site_symmetry_order
 _atom_site_calc_flag
 _atom_site_refinement_flags_posn
 _atom_site_refinement_flags_adp
 _atom_site_refinement_flags_occupancy
 _atom_site_disorder_assembly
 _atom_site_disorder_group
C0 C 0.65711(16) 0.68182(14) 0.19681(7) 0.0209(4) Uani 1 1 d . . . . .
H43 H 0.7213 0.6471 0.1894 0.025 Uiso 1 1 calc R U . . .
C1 C 0.67997(15) 0.85794(14) 0.30378(7) 0.0184(4) Uani 1 1 d . . . . .
C2 C 0.95967(16) 0.63681(14) 0.18727(8) 0.0220(4) Uani 1 1 d . . . . .
C3 C 0.88373(16) 0.54135(14) 0.26316(7) 0.0206(4) Uani 1 1 d . . . . .
C4 C 0.82861(15) 0.39939(14) 0.21994(7) 0.0181(4) Uani 1 1 d . . . . .
C5 C 0.60573(15) 0.62295(14) 0.32738(8) 0.0187(4) Uani 1 1 d . . . . .
C6 C 0.62158(15) 0.88303(14) 0.34403(7) 0.0180(4) Uani 1 1 d . . . . .
C7 C 0.87328(15) 0.49699(14) 0.21468(7) 0.0178(4) Uani 1 1 d . . . . .
C8 C 0.56207(17) 0.53864(15) 0.22693(8) 0.0244(5) Uani 1 1 d . . . . .
H18 H 0.5540 0.5085 0.1942 0.029 Uiso 1 1 calc R U . . .
C9 C 0.90082(15) 0.55122(14) 0.17330(7) 0.0186(4) Uani 1 1 d . . . . .
C10 C 0.96745(16) 0.34061(14) 0.14283(8) 0.0207(4) Uani 1 1 d . . . . .
H28 H 0.9972 0.3885 0.1670 0.025 Uiso 1 1 calc R U . . .
C11 C 0.78590(17) 0.91913(15) 0.24247(8) 0.0239(4) Uani 1 1 d . . . . .
H9 H 0.8333 0.9656 0.2337 0.029 Uiso 1 1 calc R U . . .
C12 C 0.79632(16) 0.39689(15) 0.26738(7) 0.0208(4) Uani 1 1 d . . . . .
C13 C 0.62578(15) 0.67441(14) 0.28368(7) 0.0182(4) Uani 1 1 d . . . . .
C14 C 0.54645(16) 0.53650(14) 0.31662(8) 0.0221(4) Uani 1 1 d . . . . .
C15 C 0.61109(16) 0.62699(14) 0.23578(7) 0.0200(4) Uani 1 1 d . . . . .
C16 C 0.64507(16) 0.64772(14) 0.38221(8) 0.0198(4) Uani 1 1 d . . . . .
C17 C 0.52577(17) 0.49620(15) 0.26669(8) 0.0251(5) Uani 1 1 d . . . . .
H19 H 0.4861 0.4388 0.2604 0.030 Uiso 1 1 calc R U . . .
C18 C 0.83171(17) 0.48457(15) 0.29910(8) 0.0215(4) Uani 1 1 d . . . . .
H44 H 0.7651 0.5186 0.3042 0.026 Uiso 1 1 calc R U . . .
C19 C 0.81635(15) 0.31402(14) 0.18976(7) 0.0193(4) Uani 1 1 d . . . . .
C20 C 0.60304(17) 0.59925(15) 0.42075(8) 0.0249(5) Uani 1 1 d . . . . .
C21 C 0.74760(16) 0.92834(14) 0.28866(8) 0.0212(4) Uani 1 1 d . . . . .
C22 C 0.53004(16) 0.83207(14) 0.35168(7) 0.0201(4) Uani 1 1 d . . . . .
H1 H 0.5055 0.7790 0.3303 0.024 Uiso 1 1 calc R U . . .
C23 C 0.78449(16) 0.46673(15) 0.09691(8) 0.0226(4) Uani 1 1 d . . . . .
H20 H 0.7416 0.4403 0.1188 0.027 Uiso 1 1 calc R U . . .
C24 C 0.97503(17) 0.67401(15) 0.23774(8) 0.0258(5) Uani 1 1 d . . . . .
H21 H 1.0148 0.7310 0.2462 0.031 Uiso 1 1 calc R U . . .
C25 C 0.66828(15) 0.77101(14) 0.27536(7) 0.0181(4) Uani 1 1 d . . . . .
C26 C 0.74681(16) 0.24266(15) 0.20328(8) 0.0225(4) Uani 1 1 d . . . . .
C27 C 0.69654(16) 0.77047(14) 0.22692(8) 0.0210(4) Uani 1 1 d . . . . .
C28 C 0.75497(17) 0.84332(15) 0.21010(8) 0.0243(5) Uani 1 1 d . . . . .
H10 H 0.7730 0.8406 0.1770 0.029 Uiso 1 1 calc R U . . .
C29 C 0.90323(17) 0.46204(15) 0.35209(8) 0.0226(4) Uani 1 1 d . . . . .
C30 C 0.72813(16) 0.71424(15) 0.39919(8) 0.0218(4) Uani 1 1 d . . . . .
H2 H 0.7634 0.7421 0.3746 0.026 Uiso 1 1 calc R U . . .
C31 C 0.93308(17) 0.62872(15) 0.27493(8) 0.0249(5) Uani 1 1 d . . . . .
H22 H 0.9377 0.6565 0.3081 0.030 Uiso 1 1 calc R U . . .
C32 C 0.71668(18) 0.16296(15) 0.16959(9) 0.0289(5) Uani 1 1 d . . . . .
H29 H 0.6676 0.1175 0.1778 0.035 Uiso 1 1 calc R U . . .
C33 C 0.50816(18) 0.48873(15) 0.35703(9) 0.0278(5) Uani 1 1 d . . . . .
H30 H 0.4654 0.4333 0.3489 0.033 Uiso 1 1 calc R U . . .
C34 C 0.65027(16) 0.96672(14) 0.37333(7) 0.0207(4) Uani 1 1 d . . . . .
C35 C 0.77444(17) 1.01173(15) 0.31950(8) 0.0238(5) Uani 1 1 d . . . . .
H11 H 0.8237 1.0562 0.3105 0.029 Uiso 1 1 calc R U . . .
C36 C 0.47525(16) 0.85738(14) 0.38947(8) 0.0222(4) Uani 1 1 d . . . . .
H3 H 0.4149 0.8210 0.3945 0.027 Uiso 1 1 calc R U . . .
C37 C 0.57627(17) 0.70191(14) 0.14559(8) 0.0220(4) Uani 1 1 d . . . . .
C38 C 0.87333(16) 0.29160(14) 0.14902(8) 0.0208(4) Uani 1 1 d . . . . .
C39 C 0.70792(17) 0.24854(16) 0.24900(8) 0.0260(5) Uani 1 1 d . . . . .
H31 H 0.6609 0.2009 0.2569 0.031 Uiso 1 1 calc R U . . .
C40 C 0.92274(17) 0.57667(15) 0.08291(8) 0.0238(5) Uani 1 1 d . . . . .
C41 C 1.00614(17) 0.68620(15) 0.14991(9) 0.0275(5) Uani 1 1 d . . . . .
H23 H 1.0468 0.7422 0.1600 0.033 Uiso 1 1 calc R U . . .
C42 C 1.01679(18) 0.32048(16) 0.10263(8) 0.0273(5) Uani 1 1 d . . . . .
H32 H 1.0793 0.3552 0.0988 0.033 Uiso 1 1 calc R U . . .
C43 C 0.76207(17) 0.44292(16) 0.04504(8) 0.0272(5) Uani 1 1 d . . . . .
H24 H 0.7046 0.4000 0.0317 0.033 Uiso 1 1 calc R U . . .
C44 C 0.86959(16) 0.52943(14) 0.11813(7) 0.0189(4) Uani 1 1 d . . . . .
C45 C 0.75973(17) 0.74013(16) 0.45063(8) 0.0250(5) Uani 1 1 d . . . . .
H4 H 0.8139 0.7874 0.4608 0.030 Uiso 1 1 calc R U . . .
C46 C 0.47303(18) 0.73732(15) 0.14550(8) 0.0261(5) Uani 1 1 d . . . . .
H12 H 0.4524 0.7476 0.1776 0.031 Uiso 1 1 calc R U . . .
C47 C 0.73755(17) 0.32277(15) 0.28242(8) 0.0242(5) Uani 1 1 d . . . . .
H33 H 0.7183 0.3236 0.3153 0.029 Uiso 1 1 calc R U . . .
C48 C 0.83858(18) 0.21325(15) 0.11603(8) 0.0265(5) Uani 1 1 d . . . . .
C49 C 0.73121(17) 1.02823(15) 0.36110(8) 0.0241(5) Uani 1 1 d . . . . .
H13 H 0.7548 1.0814 0.3825 0.029 Uiso 1 1 calc R U . . .
C50 C 0.82348(19) 0.48160(18) 0.01189(9) 0.0329(5) Uani 1 1 d . . . . .
H25 H 0.8118 0.4614 -0.0232 0.040 Uiso 1 1 calc R U . . .
C51 C 1.01487(18) 0.44629(16) 0.35878(8) 0.0272(5) Uani 1 1 d . . . . .
H34 H 1.0480 0.4523 0.3299 0.033 Uiso 1 1 calc R U . . .
C52 C 0.50884(17) 0.93690(16) 0.42048(8) 0.0252(5) Uani 1 1 d . . . . .
H5 H 0.4731 0.9531 0.4475 0.030 Uiso 1 1 calc R U . . .
C53 C 0.59324(17) 0.99106(15) 0.41177(8) 0.0236(5) Uani 1 1 d . . . . .
H6 H 0.6137 1.0462 0.4321 0.028 Uiso 1 1 calc R U . . .
C54 C 0.75643(19) 0.15123(16) 0.12656(9) 0.0315(5) Uani 1 1 d . . . . .
H35 H 0.7297 0.1015 0.1031 0.038 Uiso 1 1 calc R U . . .
C55 C 0.53145(19) 0.52065(16) 0.40630(9) 0.0292(5) Uani 1 1 d . . . . .
H36 H 0.5000 0.4907 0.4317 0.035 Uiso 1 1 calc R U . . .
C56 C 0.99318(18) 0.65466(16) 0.10066(9) 0.0287(5) Uani 1 1 d . . . . .
H26 H 1.0311 0.6845 0.0776 0.034 Uiso 1 1 calc R U . . .
C57 C 0.90061(18) 0.54884(17) 0.03054(8) 0.0296(5) Uani 1 1 d . . . . .
H27 H 0.9399 0.5772 0.0076 0.036 Uiso 1 1 calc R U . . .
C58 C 0.8897(2) 0.19527(18) 0.07467(9) 0.0361(6) Uani 1 1 d . . . . .
H37 H 0.8641 0.1448 0.0515 0.043 Uiso 1 1 calc R U . . .
C59 C 0.3995(2) 0.75800(16) 0.09935(9) 0.0317(5) Uani 1 1 d . . . . .
H14 H 0.3295 0.7826 0.1000 0.038 Uiso 1 1 calc R U . . .
C60 C 0.71235(19) 0.69706(17) 0.48793(8) 0.0318(5) Uani 1 1 d . . . . .
H7 H 0.7323 0.7164 0.5232 0.038 Uiso 1 1 calc R U . . .
C61 C 1.0782(2) 0.42213(16) 0.40669(9) 0.0334(5) Uani 1 1 d . . . . .
H38 H 1.1542 0.4113 0.4105 0.040 Uiso 1 1 calc R U . . .
C62 C 0.63687(19) 0.62677(17) 0.47324(8) 0.0311(5) Uani 1 1 d . . . . .
H8 H 0.6068 0.5960 0.4989 0.037 Uiso 1 1 calc R U . . .
C63 C 0.8565(2) 0.45402(17) 0.39486(9) 0.0329(5) Uani 1 1 d . . . . .
H39 H 0.7806 0.4652 0.3913 0.040 Uiso 1 1 calc R U . . .
C64 C 0.4283(2) 0.74279(16) 0.05239(8) 0.0327(5) Uani 1 1 d . . . . .
H15 H 0.3786 0.7575 0.0207 0.039 Uiso 1 1 calc R U . . .
C65 C 0.5300(2) 0.70598(17) 0.05193(9) 0.0336(6) Uani 1 1 d . . . . .
H16 H 0.5496 0.6943 0.0197 0.040 Uiso 1 1 calc R U . . .
C66 C 0.60395(19) 0.68586(16) 0.09830(8) 0.0284(5) Uani 1 1 d . . . . .
H17 H 0.6738 0.6610 0.0975 0.034 Uiso 1 1 calc R U . . .
C67 C 0.9753(2) 0.24877(18) 0.06709(9) 0.0360(6) Uani 1 1 d . . . . .
H40 H 1.0066 0.2375 0.0380 0.043 Uiso 1 1 calc R U . . .
C68 C 1.0315(2) 0.41365(17) 0.44902(9) 0.0385(6) Uani 1 1 d . . . . .
H41 H 1.0750 0.3971 0.4820 0.046 Uiso 1 1 calc R U . . .
C69 C 0.9211(2) 0.42940(19) 0.44318(9) 0.0416(6) Uani 1 1 d . . . . .
H42 H 0.8887 0.4235 0.4723 0.050 Uiso 1 1 calc R U . . .

loop_
 _atom_site_aniso_label
 _atom_site_aniso_U_11
 _atom_site_aniso_U_22
 _atom_site_aniso_U_33
 _atom_site_aniso_U_23
 _atom_site_aniso_U_13
 _atom_site_aniso_U_12
C0 0.0199(10) 0.0206(11) 0.0222(10) -0.0036(8) 0.0049(8) 0.0034(8)
C1 0.0156(9) 0.0181(10) 0.0205(10) 0.0027(8) 0.0021(7) 0.0019(8)
C2 0.0191(10) 0.0169(10) 0.0285(11) 0.0015(8) 0.0016(8) 0.0020(8)
C3 0.0201(10) 0.0207(11) 0.0195(9) 0.0011(8) 0.0011(8) 0.0047(8)
C4 0.0135(9) 0.0200(10) 0.0203(9) 0.0011(8) 0.0023(7) 0.0017(8)
C5 0.0153(9) 0.0171(10) 0.0244(10) 0.0005(8) 0.0056(8) 0.0025(8)
C6 0.0174(9) 0.0157(10) 0.0196(9) 0.0016(8) 0.0014(7) 0.0022(8)
C7 0.0153(9) 0.0163(10) 0.0210(10) -0.0007(8) 0.0024(7) 0.0025(8)
C8 0.0245(11) 0.0198(11) 0.0258(10) -0.0027(9) -0.0011(8) 0.0026(9)
C9 0.0155(9) 0.0169(10) 0.0227(10) 0.0019(8) 0.0028(7) 0.0019(8)
C10 0.0194(10) 0.0170(10) 0.0252(10) -0.0001(8) 0.0038(8) 0.0019(8)
C11 0.0227(10) 0.0226(11) 0.0283(11) 0.0036(9) 0.0100(8) -0.0021(9)
C12 0.0186(10) 0.0224(11) 0.0206(10) 0.0011(8) 0.0029(8) 0.0031(8)
C13 0.0144(9) 0.0154(10) 0.0244(10) -0.0004(8) 0.0031(7) 0.0031(8)
C14 0.0177(10) 0.0161(10) 0.0322(11) 0.0028(8) 0.0050(8) 0.0032(8)
C15 0.0188(10) 0.0181(10) 0.0212(10) 0.0011(8) 0.0007(8) 0.0030(8)
C16 0.0188(10) 0.0176(10) 0.0236(10) 0.0027(8) 0.0063(8) 0.0050(8)
C17 0.0204(10) 0.0178(11) 0.0342(12) -0.0015(9) -0.0002(9) -0.0008(8)
C18 0.0205(10) 0.0240(11) 0.0205(10) -0.0011(8) 0.0056(8) 0.0041(8)
C19 0.0155(9) 0.0185(10) 0.0223(10) 0.0013(8) 0.0009(7) 0.0006(8)
C20 0.0231(11) 0.0252(12) 0.0280(11) 0.0050(9) 0.0092(9) 0.0041(9)
C21 0.0190(10) 0.0204(11) 0.0238(10) 0.0010(8) 0.0036(8) 0.0001(8)
C22 0.0199(10) 0.0171(10) 0.0218(10) -0.0004(8) 0.0012(8) 0.0033(8)
C23 0.0192(10) 0.0251(11) 0.0226(10) 0.0019(8) 0.0027(8) 0.0031(9)
C24 0.0247(11) 0.0170(11) 0.0318(12) -0.0021(9) -0.0023(9) -0.0021(9)
C25 0.0160(9) 0.0173(10) 0.0206(9) 0.0005(8) 0.0032(7) 0.0007(8)
C26 0.0179(10) 0.0203(11) 0.0279(11) 0.0019(8) 0.0022(8) 0.0004(8)
C27 0.0197(10) 0.0206(11) 0.0221(10) -0.0008(8) 0.0030(8) 0.0027(8)
C28 0.0263(11) 0.0253(11) 0.0234(10) 0.0018(9) 0.0098(9) 0.0004(9)
C29 0.0273(11) 0.0214(11) 0.0193(10) -0.0015(8) 0.0059(8) 0.0026(9)
C30 0.0205(10) 0.0220(11) 0.0231(10) 0.0019(8) 0.0053(8) 0.0022(8)
C31 0.0265(11) 0.0219(11) 0.0235(10) -0.0034(8) -0.0007(8) 0.0016(9)
C32 0.0273(12) 0.0207(11) 0.0394(13) -0.0010(10) 0.0087(10) -0.0043(9)
C33 0.0251(11) 0.0194(11) 0.0393(13) 0.0037(9) 0.0080(9) -0.0018(9)
C34 0.0216(10) 0.0182(10) 0.0208(10) -0.0006(8) 0.0010(8) 0.0013(8)
C35 0.0210(10) 0.0185(11) 0.0315(11) 0.0014(9) 0.0052(9) -0.0031(8)
C36 0.0190(10) 0.0213(11) 0.0263(11) 0.0013(8) 0.0050(8) 0.0013(8)
C37 0.0277(11) 0.0166(10) 0.0216(10) -0.0014(8) 0.0054(8) -0.0010(8)
C38 0.0213(10) 0.0178(10) 0.0230(10) -0.0003(8) 0.0038(8) 0.0030(8)
C39 0.0227(11) 0.0250(11) 0.0306(11) 0.0064(9) 0.0068(9) -0.0028(9)
C40 0.0206(10) 0.0258(11) 0.0257(10) 0.0070(9) 0.0066(8) 0.0065(9)
C41 0.0229(11) 0.0200(11) 0.0383(12) 0.0076(9) 0.0040(9) -0.0007(9)
C42 0.0222(11) 0.0276(12) 0.0337(12) -0.0025(9) 0.0097(9) 0.0019(9)
C43 0.0215(11) 0.0351(13) 0.0231(10) -0.0030(9) 0.0007(8) 0.0032(9)
C44 0.0190(10) 0.0180(10) 0.0207(10) 0.0027(8) 0.0062(8) 0.0049(8)
C45 0.0223(11) 0.0269(12) 0.0249(10) -0.0024(9) 0.0035(8) 0.0016(9)
C46 0.0303(12) 0.0251(12) 0.0228(10) -0.0010(9) 0.0054(9) 0.0039(9)
C47 0.0227(11) 0.0292(12) 0.0214(10) 0.0043(9) 0.0068(8) -0.0006(9)
C48 0.0258(11) 0.0233(11) 0.0310(11) -0.0057(9) 0.0073(9) -0.0001(9)
C49 0.0244(11) 0.0177(10) 0.0279(11) -0.0026(8) 0.0009(8) -0.0030(9)
C50 0.0302(12) 0.0485(15) 0.0203(11) 0.0018(10) 0.0057(9) 0.0061(11)
C51 0.0267(11) 0.0299(12) 0.0236(10) 0.0026(9) 0.0027(9) 0.0029(9)
C52 0.0246(11) 0.0287(12) 0.0237(10) -0.0031(9) 0.0080(8) 0.0042(9)
C53 0.0254(11) 0.0215(11) 0.0223(10) -0.0042(8) 0.0017(8) 0.0028(9)
C54 0.0303(12) 0.0227(12) 0.0414(13) -0.0109(10) 0.0078(10) -0.0049(10)
C55 0.0317(12) 0.0249(12) 0.0349(12) 0.0090(9) 0.0156(10) -0.0010(10)
C56 0.0262(11) 0.0273(12) 0.0349(12) 0.0115(10) 0.0115(9) 0.0014(9)
C57 0.0297(12) 0.0370(13) 0.0242(11) 0.0105(10) 0.0101(9) 0.0068(10)
C58 0.0376(14) 0.0347(14) 0.0394(13) -0.0188(11) 0.0156(11) -0.0059(11)
C59 0.0337(13) 0.0221(12) 0.0355(12) -0.0001(10) -0.0005(10) 0.0036(10)
C60 0.0323(12) 0.0410(14) 0.0225(11) -0.0024(10) 0.0068(9) 0.0052(11)
C61 0.0335(13) 0.0297(13) 0.0322(12) 0.0042(10) -0.0029(10) 0.0011(10)
C62 0.0352(13) 0.0372(14) 0.0242(11) 0.0059(10) 0.0136(10) 0.0029(11)
C63 0.0359(13) 0.0377(14) 0.0268(11) 0.0017(10) 0.0103(10) 0.0045(11)
C64 0.0457(15) 0.0255(12) 0.0222(11) 0.0038(9) -0.0027(10) -0.0058(11)
C65 0.0450(15) 0.0359(14) 0.0213(11) -0.0021(10) 0.0102(10) -0.0113(11)
C66 0.0308(12) 0.0298(12) 0.0263(11) -0.0028(9) 0.0098(9) -0.0038(10)
C67 0.0344(13) 0.0421(15) 0.0365(13) -0.0153(11) 0.0184(11) -0.0032(11)
C68 0.0502(16) 0.0343(14) 0.0248(12) 0.0052(10) -0.0051(11) 0.0013(12)
C69 0.0576(17) 0.0483(16) 0.0202(11) 0.0056(11) 0.0111(11) 0.0052(13)

_geom_special_details
;
 All esds (except the esd in the dihedral angle between two l.s. planes)
 are estimated using the full covariance matrix.  The cell esds are taken
 into account individually in the estimation of esds in distances, angles
 and torsion angles; correlations between esds in cell parameters are only
 used when they are defined by crystal symmetry.  An approximate (isotropic)
 treatment of cell esds is used for estimating esds involving l.s. planes.
;

loop_
 _geom_bond_atom_site_label_1
 _geom_bond_atom_site_label_2
 _geom_bond_distance
 _geom_bond_site_symmetry_2
 _geom_bond_publ_flag
C0 C15 1.502(3) . ?
C0 C27 1.511(3) . ?
C0 C37 1.528(3) . ?
C0 H43 1.0000 . ?
C1 C21 1.423(3) . ?
C1 C25 1.433(3) . ?
C1 C6 1.461(3) . ?
C2 C24 1.406(3) . ?
C2 C9 1.427(3) . ?
C2 C41 1.434(3) . ?
C3 C31 1.390(3) . ?
C3 C7 1.405(3) . ?
C3 C18 1.499(3) . ?
C4 C12 1.399(3) . ?
C4 C19 1.439(3) . ?
C4 C7 1.511(3) . ?
C5 C14 1.430(3) . ?
C5 C13 1.433(3) . ?
C5 C16 1.465(3) . ?
C6 C22 1.409(3) . ?
C6 C34 1.419(3) . ?
C7 C9 1.439(3) . ?
C8 C17 1.371(3) . ?
C8 C15 1.393(3) . ?
C8 H18 0.9500 . ?
C9 C44 1.455(3) . ?
C10 C42 1.371(3) . ?
C10 C38 1.411(3) . ?
C10 H28 0.9500 . ?
C11 C28 1.375(3) . ?
C11 C21 1.411(3) . ?
C11 H9 0.9500 . ?
C12 C47 1.391(3) . ?
C12 C18 1.510(3) . ?
C13 C15 1.407(3) . ?
C13 C25 1.504(3) . ?
C14 C17 1.407(3) . ?
C14 C33 1.433(3) . ?
C16 C30 1.405(3) . ?
C16 C20 1.422(3) . ?
C17 H19 0.9500 . ?
C18 C29 1.520(3) . ?
C18 H44 1.0000 . ?
C19 C26 1.432(3) . ?
C19 C38 1.451(3) . ?
C20 C62 1.411(3) . ?
C20 C55 1.430(3) . ?
C21 C35 1.433(3) . ?
C22 C36 1.378(3) . ?
C22 H1 0.9500 . ?
C23 C43 1.377(3) . ?
C23 C44 1.408(3) . ?
C23 H20 0.9500 . ?
C24 C31 1.371(3) . ?
C24 H21 0.9500 . ?
C25 C27 1.400(3) . ?
C26 C39 1.400(3) . ?
C26 C32 1.436(3) . ?
C27 C28 1.395(3) . ?
C28 H10 0.9500 . ?
C29 C63 1.387(3) . ?
C29 C51 1.392(3) . ?
C30 C45 1.377(3) . ?
C30 H2 0.9500 . ?
C31 H22 0.9500 . ?
C32 C54 1.347(3) . ?
C32 H29 0.9500 . ?
C33 C55 1.346(3) . ?
C33 H30 0.9500 . ?
C34 C53 1.407(3) . ?
C34 C49 1.429(3) . ?
C35 C49 1.348(3) . ?
C35 H11 0.9500 . ?
C36 C52 1.403(3) . ?
C36 H3 0.9500 . ?
C37 C66 1.386(3) . ?
C37 C46 1.390(3) . ?
C38 C48 1.420(3) . ?
C39 C47 1.371(3) . ?
C39 H31 0.9500 . ?
C40 C57 1.405(3) . ?
C40 C44 1.425(3) . ?
C40 C56 1.429(3) . ?
C41 C56 1.350(3) . ?
C41 H23 0.9500 . ?
C42 C67 1.403(3) . ?
C42 H32 0.9500 . ?
C43 C50 1.399(3) . ?
C43 H24 0.9500 . ?
C45 C60 1.398(3) . ?
C45 H4 0.9500 . ?
C46 C59 1.388(3) . ?
C46 H12 0.9500 . ?
C47 H33 0.9500 . ?
C48 C58 1.406(3) . ?
C48 C54 1.429(3) . ?
C49 H13 0.9500 . ?
C50 C57 1.371(3) . ?
C50 H25 0.9500 . ?
C51 C61 1.381(3) . ?
C51 H34 0.9500 . ?
C52 C53 1.369(3) . ?
C52 H5 0.9500 . ?
C53 H6 0.9500 . ?
C54 H35 0.9500 . ?
C55 H36 0.9500 . ?
C56 H26 0.9500 . ?
C57 H27 0.9500 . ?
C58 C67 1.366(3) . ?
C58 H37 0.9500 . ?
C59 C64 1.382(3) . ?
C59 H14 0.9500 . ?
C60 C62 1.371(3) . ?
C60 H7 0.9500 . ?
C61 C68 1.377(3) . ?
C61 H38 0.9500 . ?
C62 H8 0.9500 . ?
C63 C69 1.396(3) . ?
C63 H39 0.9500 . ?
C64 C65 1.382(3) . ?
C64 H15 0.9500 . ?
C65 C66 1.393(3) . ?
C65 H16 0.9500 . ?
C66 H17 0.9500 . ?
C67 H40 0.9500 . ?
C68 C69 1.379(4) . ?
C68 H41 0.9500 . ?
C69 H42 0.9500 . ?

loop_
 _geom_angle_atom_site_label_1
 _geom_angle_atom_site_label_2
 _geom_angle_atom_site_label_3
 _geom_angle
 _geom_angle_site_symmetry_1
 _geom_angle_site_symmetry_3
 _geom_angle_publ_flag
C15 C0 C27 101.64(16) . . ?
C15 C0 C37 114.91(17) . . ?
C27 C0 C37 112.76(17) . . ?
C15 C0 H43 109.1 . . ?
C27 C0 H43 109.1 . . ?
C37 C0 H43 109.1 . . ?
C21 C1 C25 117.07(18) . . ?
C21 C1 C6 117.31(18) . . ?
C25 C1 C6 125.42(18) . . ?
C24 C2 C9 121.28(19) . . ?
C24 C2 C41 118.45(19) . . ?
C9 C2 C41 120.27(19) . . ?
C31 C3 C7 123.38(19) . . ?
C31 C3 C18 124.92(18) . . ?
C7 C3 C18 111.66(18) . . ?
C12 C4 C19 117.22(18) . . ?
C12 C4 C7 106.98(17) . . ?
C19 C4 C7 135.76(18) . . ?
C14 C5 C13 116.93(18) . . ?
C14 C5 C16 116.70(18) . . ?
C13 C5 C16 126.28(18) . . ?
C22 C6 C34 117.91(18) . . ?
C22 C6 C1 122.33(18) . . ?
C34 C6 C1 119.46(18) . . ?
C3 C7 C9 117.50(18) . . ?
C3 C7 C4 106.76(17) . . ?
C9 C7 C4 135.68(17) . . ?
C17 C8 C15 118.40(19) . . ?
C17 C8 H18 120.8 . . ?
C15 C8 H18 120.8 . . ?
C2 C9 C7 117.14(18) . . ?
C2 C9 C44 116.70(18) . . ?
C7 C9 C44 126.08(18) . . ?
C42 C10 C38 121.31(19) . . ?
C42 C10 H28 119.3 . . ?
C38 C10 H28 119.3 . . ?
C28 C11 C21 120.36(19) . . ?
C28 C11 H9 119.8 . . ?
C21 C11 H9 119.8 . . ?
C47 C12 C4 123.43(19) . . ?
C47 C12 C18 125.01(18) . . ?
C4 C12 C18 111.56(18) . . ?
C15 C13 C5 117.89(18) . . ?
C15 C13 C25 106.54(17) . . ?
C5 C13 C25 135.43(18) . . ?
C17 C14 C5 120.99(19) . . ?
C17 C14 C33 118.81(19) . . ?
C5 C14 C33 120.20(19) . . ?
C8 C15 C13 123.09(19) . . ?
C8 C15 C0 124.98(18) . . ?
C13 C15 C0 111.91(17) . . ?
C30 C16 C20 117.57(19) . . ?
C30 C16 C5 122.79(18) . . ?
C20 C16 C5 119.54(19) . . ?
C8 C17 C14 120.9(2) . . ?
C8 C17 H19 119.5 . . ?
C14 C17 H19 119.5 . . ?
C3 C18 C12 101.98(16) . . ?
C3 C18 C29 116.31(17) . . ?
C12 C18 C29 112.28(17) . . ?
C3 C18 H44 108.6 . . ?
C12 C18 H44 108.6 . . ?
C29 C18 H44 108.6 . . ?
C26 C19 C4 116.97(18) . . ?
C26 C19 C38 117.18(18) . . ?
C4 C19 C38 125.74(18) . . ?
C62 C20 C16 119.3(2) . . ?
C62 C20 C55 120.9(2) . . ?
C16 C20 C55 119.77(19) . . ?
C11 C21 C1 120.99(19) . . ?
C11 C21 C35 118.99(19) . . ?
C1 C21 C35 119.98(18) . . ?
C36 C22 C6 121.53(19) . . ?
C36 C22 H1 119.2 . . ?
C6 C22 H1 119.2 . . ?
C43 C23 C44 121.4(2) . . ?
C43 C23 H20 119.3 . . ?
C44 C23 H20 119.3 . . ?
C31 C24 C2 120.5(2) . . ?
C31 C24 H21 119.7 . . ?
C2 C24 H21 119.7 . . ?
C27 C25 C1 117.71(18) . . ?
C27 C25 C13 107.33(17) . . ?
C1 C25 C13 134.89(18) . . ?
C39 C26 C19 121.34(19) . . ?
C39 C26 C32 119.06(19) . . ?
C19 C26 C32 119.60(19) . . ?
C28 C27 C25 122.91(19) . . ?
C28 C27 C0 125.68(18) . . ?
C25 C27 C0 111.40(18) . . ?
C11 C28 C27 118.55(19) . . ?
C11 C28 H10 120.7 . . ?
C27 C28 H10 120.7 . . ?
C63 C29 C51 118.6(2) . . ?
C63 C29 C18 119.70(19) . . ?
C51 C29 C18 121.67(18) . . ?
C45 C30 C16 121.74(19) . . ?
C45 C30 H2 119.1 . . ?
C16 C30 H2 119.1 . . ?
C24 C31 C3 118.71(19) . . ?
C24 C31 H22 120.6 . . ?
C3 C31 H22 120.6 . . ?
C54 C32 C26 121.5(2) . . ?
C54 C32 H29 119.2 . . ?
C26 C32 H29 119.2 . . ?
C55 C33 C14 121.5(2) . . ?
C55 C33 H30 119.3 . . ?
C14 C33 H30 119.3 . . ?
C53 C34 C6 119.30(19) . . ?
C53 C34 C49 120.88(19) . . ?
C6 C34 C49 119.69(18) . . ?
C49 C35 C21 121.28(19) . . ?
C49 C35 H11 119.4 . . ?
C21 C35 H11 119.4 . . ?
C22 C36 C52 119.8(2) . . ?
C22 C36 H3 120.1 . . ?
C52 C36 H3 120.1 . . ?
C66 C37 C46 118.5(2) . . ?
C66 C37 C0 121.09(19) . . ?
C46 C37 C0 120.44(18) . . ?
C10 C38 C48 117.81(19) . . ?
C10 C38 C19 122.68(18) . . ?
C48 C38 C19 119.36(19) . . ?
C47 C39 C26 120.2(2) . . ?
C47 C39 H31 119.9 . . ?
C26 C39 H31 119.9 . . ?
C57 C40 C44 119.3(2) . . ?
C57 C40 C56 120.9(2) . . ?
C44 C40 C56 119.67(19) . . ?
C56 C41 C2 121.3(2) . . ?
C56 C41 H23 119.4 . . ?
C2 C41 H23 119.4 . . ?
C10 C42 C67 120.2(2) . . ?
C10 C42 H32 119.9 . . ?
C67 C42 H32 119.9 . . ?
C23 C43 C50 120.3(2) . . ?
C23 C43 H24 119.8 . . ?
C50 C43 H24 119.8 . . ?
C23 C44 C40 117.44(18) . . ?
C23 C44 C9 123.08(18) . . ?
C40 C44 C9 119.40(18) . . ?
C30 C45 C60 120.2(2) . . ?
C30 C45 H4 119.9 . . ?
C60 C45 H4 119.9 . . ?
C59 C46 C37 121.2(2) . . ?
C59 C46 H12 119.4 . . ?
C37 C46 H12 119.4 . . ?
C39 C47 C12 118.85(19) . . ?
C39 C47 H33 120.6 . . ?
C12 C47 H33 120.6 . . ?
C58 C48 C38 119.1(2) . . ?
C58 C48 C54 120.8(2) . . ?
C38 C48 C54 120.0(2) . . ?
C35 C49 C34 120.80(19) . . ?
C35 C49 H13 119.6 . . ?
C34 C49 H13 119.6 . . ?
C57 C50 C43 119.4(2) . . ?
C57 C50 H25 120.3 . . ?
C43 C50 H25 120.3 . . ?
C61 C51 C29 121.1(2) . . ?
C61 C51 H34 119.4 . . ?
C29 C51 H34 119.4 . . ?
C53 C52 C36 119.85(19) . . ?
C53 C52 H5 120.1 . . ?
C36 C52 H5 120.1 . . ?
C52 C53 C34 121.28(19) . . ?
C52 C53 H6 119.4 . . ?
C34 C53 H6 119.4 . . ?
C32 C54 C48 120.4(2) . . ?
C32 C54 H35 119.8 . . ?
C48 C54 H35 119.8 . . ?
C33 C55 C20 120.6(2) . . ?
C33 C55 H36 119.7 . . ?
C20 C55 H36 119.7 . . ?
C41 C56 C40 120.4(2) . . ?
C41 C56 H26 119.8 . . ?
C40 C56 H26 119.8 . . ?
C50 C57 C40 121.3(2) . . ?
C50 C57 H27 119.4 . . ?
C40 C57 H27 119.4 . . ?
C67 C58 C48 121.4(2) . . ?
C67 C58 H37 119.3 . . ?
C48 C58 H37 119.3 . . ?
C64 C59 C46 119.9(2) . . ?
C64 C59 H14 120.0 . . ?
C46 C59 H14 120.0 . . ?
C62 C60 C45 119.6(2) . . ?
C62 C60 H7 120.2 . . ?
C45 C60 H7 120.2 . . ?
C68 C61 C51 120.1(2) . . ?
C68 C61 H38 119.9 . . ?
C51 C61 H38 119.9 . . ?
C60 C62 C20 121.2(2) . . ?
C60 C62 H8 119.4 . . ?
C20 C62 H8 119.4 . . ?
C29 C63 C69 119.9(2) . . ?
C29 C63 H39 120.1 . . ?
C69 C63 H39 120.1 . . ?
C59 C64 C65 119.4(2) . . ?
C59 C64 H15 120.3 . . ?
C65 C64 H15 120.3 . . ?
C64 C65 C66 120.5(2) . . ?
C64 C65 H16 119.7 . . ?
C66 C65 H16 119.7 . . ?
C37 C66 C65 120.4(2) . . ?
C37 C66 H17 119.8 . . ?
C65 C66 H17 119.8 . . ?
C58 C67 C42 119.5(2) . . ?
C58 C67 H40 120.2 . . ?
C42 C67 H40 120.2 . . ?
C61 C68 C69 119.5(2) . . ?
C61 C68 H41 120.2 . . ?
C69 C68 H41 120.2 . . ?
C68 C69 C63 120.7(2) . . ?
C68 C69 H42 119.7 . . ?
C63 C69 H42 119.7 . . ?

loop_
 _geom_torsion_atom_site_label_1
 _geom_torsion_atom_site_label_2
 _geom_torsion_atom_site_label_3
 _geom_torsion_atom_site_label_4
 _geom_torsion
 _geom_torsion_site_symmetry_1
 _geom_torsion_site_symmetry_2
 _geom_torsion_site_symmetry_3
 _geom_torsion_site_symmetry_4
 _geom_torsion_publ_flag
C21 C1 C6 C22 161.04(18) . . . . ?
C25 C1 C6 C22 -13.7(3) . . . . ?
C21 C1 C6 C34 -12.6(3) . . . . ?
C25 C1 C6 C34 172.63(18) . . . . ?
C31 C3 C7 C9 -9.3(3) . . . . ?
C18 C3 C7 C9 168.54(17) . . . . ?
C31 C3 C7 C4 173.05(18) . . . . ?
C18 C3 C7 C4 -9.1(2) . . . . ?
C12 C4 C7 C3 10.6(2) . . . . ?
C19 C4 C7 C3 -167.1(2) . . . . ?
C12 C4 C7 C9 -166.4(2) . . . . ?
C19 C4 C7 C9 16.0(4) . . . . ?
C24 C2 C9 C7 -9.7(3) . . . . ?
C41 C2 C9 C7 169.29(18) . . . . ?
C24 C2 C9 C44 167.29(18) . . . . ?
C41 C2 C9 C44 -13.7(3) . . . . ?
C3 C7 C9 C2 14.1(3) . . . . ?
C4 C7 C9 C2 -169.2(2) . . . . ?
C3 C7 C9 C44 -162.66(18) . . . . ?
C4 C7 C9 C44 14.1(3) . . . . ?
C19 C4 C12 C47 -11.0(3) . . . . ?
C7 C4 C12 C47 170.88(18) . . . . ?
C19 C4 C12 C18 169.91(17) . . . . ?
C7 C4 C12 C18 -8.3(2) . . . . ?
C14 C5 C13 C15 -15.5(3) . . . . ?
C16 C5 C13 C15 161.00(18) . . . . ?
C14 C5 C13 C25 169.6(2) . . . . ?
C16 C5 C13 C25 -13.9(4) . . . . ?
C13 C5 C14 C17 10.7(3) . . . . ?
C16 C5 C14 C17 -166.14(18) . . . . ?
C13 C5 C14 C33 -170.08(18) . . . . ?
C16 C5 C14 C33 13.1(3) . . . . ?
C17 C8 C15 C13 0.5(3) . . . . ?
C17 C8 C15 C0 178.67(19) . . . . ?
C5 C13 C15 C8 10.5(3) . . . . ?
C25 C13 C15 C8 -173.24(18) . . . . ?
C5 C13 C15 C0 -167.93(17) . . . . ?
C25 C13 C15 C0 8.3(2) . . . . ?
C27 C0 C15 C8 179.06(19) . . . . ?
C37 C0 C15 C8 57.0(3) . . . . ?
C27 C0 C15 C13 -2.6(2) . . . . ?
C37 C0 C15 C13 -124.64(18) . . . . ?
C14 C5 C16 C30 161.78(19) . . . . ?
C13 C5 C16 C30 -14.7(3) . . . . ?
C14 C5 C16 C20 -14.4(3) . . . . ?
C13 C5 C16 C20 169.10(19) . . . . ?
C15 C8 C17 C14 -5.9(3) . . . . ?
C5 C14 C17 C8 0.1(3) . . . . ?
C33 C14 C17 C8 -179.11(19) . . . . ?
C31 C3 C18 C12 -178.01(19) . . . . ?
C7 C3 C18 C12 4.2(2) . . . . ?
C31 C3 C18 C29 -55.5(3) . . . . ?
C7 C3 C18 C29 126.65(19) . . . . ?
C47 C12 C18 C3 -176.24(19) . . . . ?
C4 C12 C18 C3 2.9(2) . . . . ?
C47 C12 C18 C29 58.6(3) . . . . ?
C4 C12 C18 C29 -122.32(19) . . . . ?
C12 C4 C19 C26 16.2(3) . . . . ?
C7 C4 C19 C26 -166.3(2) . . . . ?
C12 C4 C19 C38 -159.79(19) . . . . ?
C7 C4 C19 C38 17.7(3) . . . . ?
C30 C16 C20 C62 7.0(3) . . . . ?
C5 C16 C20 C62 -176.66(19) . . . . ?
C30 C16 C20 C55 -170.02(19) . . . . ?
C5 C16 C20 C55 6.3(3) . . . . ?
C28 C11 C21 C1 2.5(3) . . . . ?
C28 C11 C21 C35 -175.21(19) . . . . ?
C25 C1 C21 C11 10.5(3) . . . . ?
C6 C1 C21 C11 -164.76(18) . . . . ?
C25 C1 C21 C35 -171.83(18) . . . . ?
C6 C1 C21 C35 12.9(3) . . . . ?
C34 C6 C22 C36 -5.6(3) . . . . ?
C1 C6 C22 C36 -179.28(18) . . . . ?
C9 C2 C24 C31 -0.3(3) . . . . ?
C41 C2 C24 C31 -179.3(2) . . . . ?
C21 C1 C25 C27 -17.8(3) . . . . ?
C6 C1 C25 C27 157.01(18) . . . . ?
C21 C1 C25 C13 165.8(2) . . . . ?
C6 C1 C25 C13 -19.4(3) . . . . ?
C15 C13 C25 C27 -11.1(2) . . . . ?
C5 C13 C25 C27 164.2(2) . . . . ?
C15 C13 C25 C1 165.6(2) . . . . ?
C5 C13 C25 C1 -19.1(4) . . . . ?
C4 C19 C26 C39 -10.8(3) . . . . ?
C38 C19 C26 C39 165.57(18) . . . . ?
C4 C19 C26 C32 169.67(18) . . . . ?
C38 C19 C26 C32 -14.0(3) . . . . ?
C1 C25 C27 C28 13.2(3) . . . . ?
C13 C25 C27 C28 -169.39(18) . . . . ?
C1 C25 C27 C0 -167.48(17) . . . . ?
C13 C25 C27 C0 9.9(2) . . . . ?
C15 C0 C27 C28 174.45(19) . . . . ?
C37 C0 C27 C28 -62.0(3) . . . . ?
C15 C0 C27 C25 -4.8(2) . . . . ?
C37 C0 C27 C25 118.75(19) . . . . ?
C21 C11 C28 C27 -7.8(3) . . . . ?
C25 C27 C28 C11 -0.2(3) . . . . ?
C0 C27 C28 C11 -179.36(19) . . . . ?
C3 C18 C29 C63 148.1(2) . . . . ?
C12 C18 C29 C63 -95.0(2) . . . . ?
C3 C18 C29 C51 -33.9(3) . . . . ?
C12 C18 C29 C51 83.0(2) . . . . ?
C20 C16 C30 C45 -7.3(3) . . . . ?
C5 C16 C30 C45 176.44(19) . . . . ?
C2 C24 C31 C3 5.7(3) . . . . ?
C7 C3 C31 C24 -0.7(3) . . . . ?
C18 C3 C31 C24 -178.33(19) . . . . ?
C39 C26 C32 C54 -176.4(2) . . . . ?
C19 C26 C32 C54 3.2(3) . . . . ?
C17 C14 C33 C55 175.7(2) . . . . ?
C5 C14 C33 C55 -3.5(3) . . . . ?
C22 C6 C34 C53 5.6(3) . . . . ?
C1 C6 C34 C53 179.48(17) . . . . ?
C22 C6 C34 C49 -170.18(18) . . . . ?
C1 C6 C34 C49 3.7(3) . . . . ?
C11 C21 C35 C49 173.4(2) . . . . ?
C1 C21 C35 C49 -4.3(3) . . . . ?
C6 C22 C36 C52 1.6(3) . . . . ?
C15 C0 C37 C66 -132.4(2) . . . . ?
C27 C0 C37 C66 111.7(2) . . . . ?
C15 C0 C37 C46 47.9(3) . . . . ?
C27 C0 C37 C46 -68.0(3) . . . . ?
C42 C10 C38 C48 7.3(3) . . . . ?
C42 C10 C38 C19 -177.19(19) . . . . ?
C26 C19 C38 C10 -159.71(19) . . . . ?
C4 C19 C38 C10 16.3(3) . . . . ?
C26 C19 C38 C48 15.7(3) . . . . ?
C4 C19 C38 C48 -168.27(19) . . . . ?
C19 C26 C39 C47 -1.1(3) . . . . ?
C32 C26 C39 C47 178.5(2) . . . . ?
C24 C2 C41 C56 -179.2(2) . . . . ?
C9 C2 C41 C56 1.7(3) . . . . ?
C38 C10 C42 C67 -1.2(3) . . . . ?
C44 C23 C43 C50 -0.6(3) . . . . ?
C43 C23 C44 C40 7.8(3) . . . . ?
C43 C23 C44 C9 -175.54(19) . . . . ?
C57 C40 C44 C23 -9.7(3) . . . . ?
C56 C40 C44 C23 167.09(19) . . . . ?
C57 C40 C44 C9 173.55(18) . . . . ?
C56 C40 C44 C9 -9.7(3) . . . . ?
C2 C9 C44 C23 -159.11(19) . . . . ?
C7 C9 C44 C23 17.6(3) . . . . ?
C2 C9 C44 C40 17.5(3) . . . . ?
C7 C9 C44 C40 -165.77(19) . . . . ?
C16 C30 C45 C60 2.8(3) . . . . ?
C66 C37 C46 C59 -1.2(3) . . . . ?
C0 C37 C46 C59 178.5(2) . . . . ?
C26 C39 C47 C12 7.1(3) . . . . ?
C4 C12 C47 C39 -1.0(3) . . . . ?
C18 C12 C47 C39 178.04(19) . . . . ?
C10 C38 C48 C58 -8.2(3) . . . . ?
C19 C38 C48 C58 176.2(2) . . . . ?
C10 C38 C48 C54 168.8(2) . . . . ?
C19 C38 C48 C54 -6.9(3) . . . . ?
C21 C35 C49 C34 -5.1(3) . . . . ?
C53 C34 C49 C35 -170.4(2) . . . . ?
C6 C34 C49 C35 5.3(3) . . . . ?
C23 C43 C50 C57 -5.0(3) . . . . ?
C63 C29 C51 C61 0.7(3) . . . . ?
C18 C29 C51 C61 -177.3(2) . . . . ?
C22 C36 C52 C53 2.5(3) . . . . ?
C36 C52 C53 C34 -2.4(3) . . . . ?
C6 C34 C53 C52 -1.7(3) . . . . ?
C49 C34 C53 C52 173.97(19) . . . . ?
C26 C32 C54 C48 6.3(3) . . . . ?
C58 C48 C54 C32 172.5(2) . . . . ?
C38 C48 C54 C32 -4.4(3) . . . . ?
C14 C33 C55 C20 -5.2(3) . . . . ?
C62 C20 C55 C33 -173.3(2) . . . . ?
C16 C20 C55 C33 3.7(3) . . . . ?
C2 C41 C56 C40 6.8(3) . . . . ?
C57 C40 C56 C41 174.0(2) . . . . ?
C44 C40 C56 C41 -2.7(3) . . . . ?
C43 C50 C57 C40 2.9(3) . . . . ?
C44 C40 C57 C50 4.5(3) . . . . ?
C56 C40 C57 C50 -172.2(2) . . . . ?
C38 C48 C58 C67 3.2(4) . . . . ?
C54 C48 C58 C67 -173.8(2) . . . . ?
C37 C46 C59 C64 0.5(3) . . . . ?
C30 C45 C60 C62 2.1(3) . . . . ?
C29 C51 C61 C68 -0.3(4) . . . . ?
C45 C60 C62 C20 -2.3(3) . . . . ?
C16 C20 C62 C60 -2.3(3) . . . . ?
C55 C20 C62 C60 174.6(2) . . . . ?
C51 C29 C63 C69 -0.8(3) . . . . ?
C18 C29 C63 C69 177.3(2) . . . . ?
C46 C59 C64 C65 0.7(3) . . . . ?
C59 C64 C65 C66 -1.2(3) . . . . ?
C46 C37 C66 C65 0.7(3) . . . . ?
C0 C37 C66 C65 -179.0(2) . . . . ?
C64 C65 C66 C37 0.4(3) . . . . ?
C48 C58 C67 C42 3.0(4) . . . . ?
C10 C42 C67 C58 -4.1(4) . . . . ?
C51 C61 C68 C69 0.0(4) . . . . ?
C61 C68 C69 C63 -0.1(4) . . . . ?
C29 C63 C69 C68 0.5(4) . . . . ?

_refine_diff_density_max    0.227
_refine_diff_density_min   -0.236
_refine_diff_density_rms    0.046

_shelxl_version_number 2014-3

_shelx_res_file
;
TITL
REM  Yadorkari-X generated
CELL 0.71075 12.5580 14.1800 26.3850 90.0000 102.7200 90.0000
ZERR 8.0 0.0040 0.0040 0.0080 0.0000 0.0050 0.0000
LATT 1
SYMM -X, 1/2+Y, 1/2-Z
REM  SPGR P21/c monoclinic
SFAC C H
UNIT 280 176
SIZE 0.50 0.50 0.05
TEMP -180.0
L.S. 5
FMAP 2
PLAN -20
ACTA
CONF
HTAB
LIST 4
BOND $H
OMIT -10.000000 55.000000

WGHT    0.043400    1.938000
FVAR       3.62912
C0    1    0.657106    0.681817    0.196814    11.00000    0.01991    0.02058 =
         0.02220   -0.00365    0.00490    0.00337
AFIX  13
H43   2    0.721339    0.647107    0.189434    11.00000   -1.20000
AFIX   0
C1    1    0.679973    0.857941    0.303781    11.00000    0.01560    0.01811 =
         0.02055    0.00268    0.00212    0.00187
C2    1    0.959674    0.636812    0.187265    11.00000    0.01908    0.01688 =
         0.02845    0.00152    0.00164    0.00201
C3    1    0.883726    0.541350    0.263157    11.00000    0.02013    0.02067 =
         0.01949    0.00106    0.00109    0.00470
C4    1    0.828611    0.399388    0.219939    11.00000    0.01354    0.01997 =
         0.02028    0.00108    0.00232    0.00168
C5    1    0.605727    0.622951    0.327378    11.00000    0.01530    0.01709 =
         0.02444    0.00051    0.00564    0.00246
C6    1    0.621575    0.883030    0.344032    11.00000    0.01737    0.01572 =
         0.01962    0.00160    0.00139    0.00224
C7    1    0.873284    0.496987    0.214677    11.00000    0.01530    0.01627 =
         0.02099   -0.00069    0.00241    0.00254
C8    1    0.562070    0.538635    0.226934    11.00000    0.02447    0.01980 =
         0.02577   -0.00271   -0.00114    0.00263
AFIX  43
H18   2    0.553974    0.508491    0.194151    11.00000   -1.20000
AFIX   0
C9    1    0.900823    0.551217    0.173296    11.00000    0.01547    0.01691 =
         0.02269    0.00190    0.00281    0.00192
C10   1    0.967452    0.340607    0.142832    11.00000    0.01940    0.01703 =
         0.02525   -0.00007    0.00378    0.00189
AFIX  43
H28   2    0.997215    0.388497    0.167000    11.00000   -1.20000
AFIX   0
C11   1    0.785900    0.919125    0.242468    11.00000    0.02271    0.02259 =
         0.02828    0.00360    0.00998   -0.00214
AFIX  43
H9    2    0.833322    0.965564    0.233698    11.00000   -1.20000
AFIX   0
C12   1    0.796322    0.396894    0.267379    11.00000    0.01865    0.02242 =
         0.02057    0.00109    0.00289    0.00309
C13   1    0.625775    0.674412    0.283681    11.00000    0.01437    0.01544 =
         0.02437   -0.00043    0.00309    0.00313
C14   1    0.546448    0.536500    0.316621    11.00000    0.01767    0.01613 =
         0.03217    0.00275    0.00504    0.00324
C15   1    0.611093    0.626988    0.235779    11.00000    0.01879    0.01814 =
         0.02121    0.00115    0.00071    0.00305
C16   1    0.645068    0.647721    0.382206    11.00000    0.01880    0.01759 =
         0.02362    0.00271    0.00628    0.00496
C17   1    0.525768    0.496202    0.266687    11.00000    0.02036    0.01777 =
         0.03423   -0.00153   -0.00023   -0.00083
AFIX  43
H19   2    0.486090    0.438773    0.260417    11.00000   -1.20000
AFIX   0
C18   1    0.831707    0.484568    0.299104    11.00000    0.02049    0.02404 =
         0.02053   -0.00108    0.00564    0.00409
AFIX  13
H44   2    0.765134    0.518625    0.304216    11.00000   -1.20000
AFIX   0
C19   1    0.816352    0.314016    0.189757    11.00000    0.01547    0.01853 =
         0.02231    0.00132    0.00089    0.00064
C20   1    0.603040    0.599253    0.420755    11.00000    0.02310    0.02524 =
         0.02797    0.00502    0.00922    0.00409
C21   1    0.747598    0.928343    0.288657    11.00000    0.01898    0.02036 =
         0.02379    0.00095    0.00357    0.00009
C22   1    0.530042    0.832068    0.351678    11.00000    0.01991    0.01712 =
         0.02180   -0.00038    0.00119    0.00334
AFIX  43
H1    2    0.505549    0.779032    0.330278    11.00000   -1.20000
AFIX   0
C23   1    0.784489    0.466735    0.096909    11.00000    0.01919    0.02515 =
         0.02264    0.00188    0.00266    0.00313
AFIX  43
H20   2    0.741615    0.440292    0.118840    11.00000   -1.20000
AFIX   0
C24   1    0.975031    0.674013    0.237745    11.00000    0.02470    0.01698 =
         0.03180   -0.00210   -0.00228   -0.00209
AFIX  43
H21   2    1.014793    0.730986    0.246162    11.00000   -1.20000
AFIX   0
C25   1    0.668281    0.771014    0.275360    11.00000    0.01602    0.01726 =
         0.02056    0.00054    0.00317    0.00072
C26   1    0.746812    0.242657    0.203276    11.00000    0.01787    0.02032 =
         0.02786    0.00186    0.00218    0.00042
C27   1    0.696539    0.770474    0.226921    11.00000    0.01971    0.02056 =
         0.02212   -0.00084    0.00297    0.00273
C28   1    0.754968    0.843323    0.210100    11.00000    0.02631    0.02528 =
         0.02344    0.00177    0.00979    0.00036
AFIX  43
H10   2    0.772987    0.840607    0.176999    11.00000   -1.20000
AFIX   0
C29   1    0.903231    0.462044    0.352090    11.00000    0.02730    0.02140 =
         0.01934   -0.00150    0.00588    0.00263
C30   1    0.728130    0.714242    0.399194    11.00000    0.02047    0.02202 =
         0.02313    0.00191    0.00526    0.00225
AFIX  43
H2    2    0.763446    0.742113    0.374555    11.00000   -1.20000
AFIX   0
C31   1    0.933075    0.628722    0.274932    11.00000    0.02652    0.02185 =
         0.02352   -0.00344   -0.00070    0.00162
AFIX  43
H22   2    0.937660    0.656538    0.308099    11.00000   -1.20000
AFIX   0
C32   1    0.716676    0.162958    0.169591    11.00000    0.02733    0.02067 =
         0.03943   -0.00100    0.00869   -0.00433
AFIX  43
H29   2    0.667589    0.117464    0.177834    11.00000   -1.20000
AFIX   0
C33   1    0.508157    0.488728    0.357029    11.00000    0.02507    0.01944 =
         0.03925    0.00368    0.00801   -0.00183
AFIX  43
H30   2    0.465363    0.433274    0.348876    11.00000   -1.20000
AFIX   0
C34   1    0.650269    0.966720    0.373334    11.00000    0.02155    0.01819 =
         0.02076   -0.00063    0.00096    0.00130
C35   1    0.774437    1.011730    0.319505    11.00000    0.02102    0.01849 =
         0.03153    0.00139    0.00516   -0.00311
AFIX  43
H11   2    0.823661    1.056246    0.310459    11.00000   -1.20000
AFIX   0
C36   1    0.475247    0.857379    0.389470    11.00000    0.01900    0.02132 =
         0.02633    0.00132    0.00500    0.00129
AFIX  43
H3    2    0.414860    0.821049    0.394506    11.00000   -1.20000
AFIX   0
C37   1    0.576272    0.701908    0.145588    11.00000    0.02767    0.01662 =
         0.02157   -0.00140    0.00540   -0.00097
C38   1    0.873331    0.291604    0.149023    11.00000    0.02126    0.01779 =
         0.02296   -0.00034    0.00379    0.00298
C39   1    0.707922    0.248539    0.248996    11.00000    0.02266    0.02500 =
         0.03063    0.00637    0.00679   -0.00283
AFIX  43
H31   2    0.660852    0.200940    0.256887    11.00000   -1.20000
AFIX   0
C40   1    0.922738    0.576672    0.082911    11.00000    0.02057    0.02581 =
         0.02565    0.00703    0.00657    0.00646
C41   1    1.006144    0.686202    0.149906    11.00000    0.02293    0.01997 =
         0.03832    0.00763    0.00400   -0.00069
AFIX  43
H23   2    1.046832    0.742192    0.160008    11.00000   -1.20000
AFIX   0
C42   1    1.016795    0.320477    0.102632    11.00000    0.02225    0.02755 =
         0.03372   -0.00249    0.00967    0.00193
AFIX  43
H32   2    1.079264    0.355190    0.098825    11.00000   -1.20000
AFIX   0
C43   1    0.762073    0.442924    0.045040    11.00000    0.02150    0.03506 =
         0.02306   -0.00305    0.00073    0.00324
AFIX  43
H24   2    0.704628    0.400025    0.031702    11.00000   -1.20000
AFIX   0
C44   1    0.869595    0.529435    0.118134    11.00000    0.01895    0.01798 =
         0.02073    0.00268    0.00619    0.00491
C45   1    0.759733    0.740133    0.450634    11.00000    0.02229    0.02694 =
         0.02485   -0.00235    0.00351    0.00164
AFIX  43
H4    2    0.813865    0.787379    0.460786    11.00000   -1.20000
AFIX   0
C46   1    0.473033    0.737323    0.145501    11.00000    0.03035    0.02506 =
         0.02280   -0.00095    0.00543    0.00386
AFIX  43
H12   2    0.452415    0.747559    0.177611    11.00000   -1.20000
AFIX   0
C47   1    0.737551    0.322772    0.282415    11.00000    0.02271    0.02924 =
         0.02140    0.00429    0.00678   -0.00065
AFIX  43
H33   2    0.718287    0.323586    0.315270    11.00000   -1.20000
AFIX   0
C48   1    0.838582    0.213246    0.116032    11.00000    0.02576    0.02334 =
         0.03104   -0.00574    0.00732   -0.00010
C49   1    0.731207    1.028234    0.361099    11.00000    0.02442    0.01772 =
         0.02787   -0.00263    0.00089   -0.00297
AFIX  43
H13   2    0.754818    1.081396    0.382545    11.00000   -1.20000
AFIX   0
C50   1    0.823476    0.481595    0.011888    11.00000    0.03016    0.04845 =
         0.02026    0.00179    0.00573    0.00605
AFIX  43
H25   2    0.811820    0.461436   -0.023241    11.00000   -1.20000
AFIX   0
C51   1    1.014874    0.446285    0.358775    11.00000    0.02671    0.02994 =
         0.02364    0.00260    0.00267    0.00291
AFIX  43
H34   2    1.048036    0.452257    0.329862    11.00000   -1.20000
AFIX   0
C52   1    0.508835    0.936900    0.420484    11.00000    0.02459    0.02869 =
         0.02372   -0.00313    0.00802    0.00422
AFIX  43
H5    2    0.473087    0.953135    0.447475    11.00000   -1.20000
AFIX   0
C53   1    0.593238    0.991061    0.411772    11.00000    0.02544    0.02150 =
         0.02227   -0.00418    0.00168    0.00281
AFIX  43
H6    2    0.613719    1.046152    0.432067    11.00000   -1.20000
AFIX   0
C54   1    0.756431    0.151231    0.126561    11.00000    0.03028    0.02275 =
         0.04142   -0.01090    0.00785   -0.00487
AFIX  43
H35   2    0.729690    0.101460    0.103099    11.00000   -1.20000
AFIX   0
C55   1    0.531447    0.520648    0.406297    11.00000    0.03169    0.02493 =
         0.03493    0.00898    0.01564   -0.00099
AFIX  43
H36   2    0.500016    0.490660    0.431703    11.00000   -1.20000
AFIX   0
C56   1    0.993177    0.654656    0.100657    11.00000    0.02620    0.02731 =
         0.03486    0.01146    0.01150    0.00140
AFIX  43
H26   2    1.031130    0.684495    0.077639    11.00000   -1.20000
AFIX   0
C57   1    0.900613    0.548836    0.030537    11.00000    0.02969    0.03696 =
         0.02419    0.01050    0.01015    0.00685
AFIX  43
H27   2    0.939875    0.577162    0.007589    11.00000   -1.20000
AFIX   0
C58   1    0.889696    0.195265    0.074674    11.00000    0.03759    0.03470 =
         0.03936   -0.01878    0.01559   -0.00587
AFIX  43
H37   2    0.864138    0.144813    0.051492    11.00000   -1.20000
AFIX   0
C59   1    0.399533    0.757999    0.099351    11.00000    0.03366    0.02206 =
         0.03552   -0.00011   -0.00047    0.00356
AFIX  43
H14   2    0.329498    0.782589    0.100042    11.00000   -1.20000
AFIX   0
C60   1    0.712348    0.697058    0.487930    11.00000    0.03225    0.04101 =
         0.02255   -0.00236    0.00677    0.00516
AFIX  43
H7    2    0.732304    0.716353    0.523233    11.00000   -1.20000
AFIX   0
C61   1    1.078244    0.422129    0.406693    11.00000    0.03347    0.02971 =
         0.03223    0.00423   -0.00289    0.00111
AFIX  43
H38   2    1.154250    0.411341    0.410464    11.00000   -1.20000
AFIX   0
C62   1    0.636867    0.626768    0.473237    11.00000    0.03517    0.03724 =
         0.02425    0.00592    0.01362    0.00293
AFIX  43
H8    2    0.606791    0.596024    0.498867    11.00000   -1.20000
AFIX   0
C63   1    0.856482    0.454018    0.394860    11.00000    0.03589    0.03768 =
         0.02682    0.00174    0.01035    0.00448
AFIX  43
H39   2    0.780612    0.465246    0.391296    11.00000   -1.20000
AFIX   0
C64   1    0.428298    0.742790    0.052394    11.00000    0.04567    0.02552 =
         0.02224    0.00378   -0.00273   -0.00584
AFIX  43
H15   2    0.378604    0.757509    0.020701    11.00000   -1.20000
AFIX   0
C65   1    0.529971    0.705983    0.051926    11.00000    0.04502    0.03592 =
         0.02133   -0.00210    0.01018   -0.01127
AFIX  43
H16   2    0.549583    0.694304    0.019717    11.00000   -1.20000
AFIX   0
C66   1    0.603951    0.685862    0.098302    11.00000    0.03082    0.02980 =
         0.02628   -0.00280    0.00977   -0.00376
AFIX  43
H17   2    0.673803    0.660989    0.097500    11.00000   -1.20000
AFIX   0
C67   1    0.975331    0.248769    0.067092    11.00000    0.03437    0.04214 =
         0.03652   -0.01532    0.01842   -0.00322
AFIX  43
H40   2    1.006575    0.237509    0.037973    11.00000   -1.20000
AFIX   0
C68   1    1.031489    0.413647    0.449017    11.00000    0.05019    0.03430 =
         0.02484    0.00525   -0.00513    0.00127
AFIX  43
H41   2    1.074978    0.397051    0.482020    11.00000   -1.20000
AFIX   0
C69   1    0.921100    0.429405    0.443180    11.00000    0.05759    0.04825 =
         0.02023    0.00556    0.01115    0.00524
AFIX  43
H42   2    0.888671    0.423455    0.472331    11.00000   -1.20000

AFIX   0
HKLF 4 1 1 0 0 0 1 0 0 0 1

REM
REM R1 =  0.0817 for    9028 Fo > 4sig(Fo)  and  0.0985 for all   10523 data
REM    631 parameters refined using      0 restraints

END

WGHT      0.0434      1.9378

REM No hydrogen bonds found for HTAB generation

REM Highest difference peak  0.227,  deepest hole -0.236,  1-sigma level  0.046
Q1    1   0.7401  0.8982  0.2169  11.00000  0.05    0.23
Q2    1   0.6374  0.6519  0.3064  11.00000  0.05    0.21
Q3    1   0.8991  0.5550  0.1018  11.00000  0.05    0.20
Q4    1   0.7440  0.9281  0.2594  11.00000  0.05    0.20
Q5    1   0.6384  0.8748  0.3221  11.00000  0.05    0.20
Q6    1   0.8788  0.5425  0.1468  11.00000  0.05    0.20
Q7    1   0.6565  0.7234  0.2895  11.00000  0.05    0.19
Q8    1   0.5757  0.8609  0.3482  11.00000  0.05    0.19
Q9    1   0.6409  0.9644  0.3966  11.00000  0.05    0.19
Q10   1   0.8787  0.1962  0.1026  11.00000  0.05    0.19
Q11   1   0.6392  0.9237  0.3627  11.00000  0.05    0.19
Q12   1   0.6357  0.6424  0.2160  11.00000  0.05    0.19
Q13   1   0.7757  0.2787  0.1964  11.00000  0.05    0.19
Q14   1   0.6225  0.9367  0.3530  11.00000  0.05    0.19
Q15   1   0.9513  0.4370  0.3546  11.00000  0.05    0.19
Q16   1   0.6132  0.5723  0.2331  11.00000  0.05    0.18
Q17   1   0.5169  0.8730  0.4136  11.00000  0.05    0.18
Q18   1   1.0756  0.7366  0.2380  11.00000  0.05    0.18
Q19   1   0.6377  0.5996  0.4477  11.00000  0.05    0.18
Q20   1   0.7785  0.6802  0.3258  11.00000  0.05    0.18
;
_shelx_res_checksum   60075

_shelx_hkl_file
;
   0   0  -3  -25.47   76.45
   0   0  -3  -45.81  150.58
   0   0   3   20.63   66.76
   0   0  -5  305.22  199.54
   0   0   5 -165.45  184.03
   0   0  -5  277.61  222.22
   0   0  -5  164.27  184.39
   0   0   5  270.68  208.52
   0   0  -7  308.40  128.48
   0   0   7   69.29   95.03
   0   0   7  323.51  191.82
   0   0  -7  -47.20  262.61
   0   0   7  414.56  133.68
   0   0  -7  -14.02  174.86
   0   0  -7 -374.36  415.16
   0   0   7  342.31  111.05
   0   0  -816139.28  696.60
   0   0   816351.12  633.35
   0   0   817947.11  797.65
   0   0  -816249.88  641.17
   0   0   818104.38  775.03
   0   0  -816057.86  711.02
   0   0  -815367.01  674.65
   0   0   815745.99  675.30
   0   0  -9  -15.61  199.77
   0   0   9 -130.09  186.27
   0   0  -9  -27.23  147.59
   0   0   9  180.92  200.13
   0   0  -9   39.42  143.65
   0   0  -9 -353.30  289.90
   0   0   9 -236.99  227.78
   0   0 -10 7939.06  805.01
   0   0  10 7093.60  347.48
   0   0  10 7703.15  267.46
   0   0 -10 6738.48  238.43
   0   0  10 8048.64  784.12
   0   0 -10 6069.48  969.57
   0   0 -10 8301.32  494.49
   0   0  10 7950.98  375.28
   0   0 -11   -1.63  244.39
   0   0  11  -55.31  144.56
   0   0  11  144.37  124.99
   0   0 -11  231.46  123.83
   0   0  11  480.82  395.58
   0   0 -11  263.03  170.09
   0   0 -11  485.11  293.71
   0   0  11  -10.41  229.16
   0   0 -12 6967.63  828.37
   0   0  12 6733.59  448.93
   0   0  12 6811.07  817.32
   0   0  12 6127.33  816.93
   0   0 -12 5385.95  417.49
   0   0 -12 6363.28  702.69
   0   0 -13  115.10  163.78
   0   0  13   44.62  135.81
   0   0  13   -2.21  342.81
   0   0  13  273.65  242.36
   0   0 -13  630.70  257.67
   0   0  14 1304.54  371.79
   0   0  14 1768.12  470.31
   0   0  14 1789.28  777.44
   0   0 -14 1299.53  477.08
   0   0  15  297.47  123.71
   0   0  15   17.85  108.90
   0   0  15 -137.73  321.13
   0   0  15  235.67  149.83
   0   0 -15  187.10  408.86
   0   0  1656543.25 1126.79
   0   0  1656336.55 1376.58
   0   0  1653779.90 1490.25
   0   0  1661077.68 2104.98
   0   0 -1660181.81 1577.69
   0   0  17  244.24  138.30
   0   0  17  373.19  270.69
   0   0  17  610.36  385.33
   0   0 -17 -442.27  497.71
   0   0  18  536.75  144.00
   0   0  18 1057.80  335.80
   0   0  18 1066.63  415.38
   0   0  18  495.12  330.37
   0   0 -18  592.75  551.09
   0   0  19  185.48   95.06
   0   0  19  -39.13  213.91
   0   0  19  994.59  385.37
   0   0  19  -47.28  459.31
   0   0 -19 -260.23  540.57
   0   0  2023489.24 1121.11
   0   0  2023428.74 1100.73
   0   0  2025339.25 1253.47
   0   0  2023262.43 1204.61
   0   0 -2023727.55 1601.99
   0   0  21  148.76  181.94
   0   0  21  -14.32  199.64
   0   0  21  110.96  256.76
   0   0  21 -434.76  447.48
   0   0 -21  168.75  266.23
   0   0  2225741.25 1182.66
   0   0  2231084.20 1349.11
   0   0  2227103.53 1345.57
   0   0  2229688.09 1307.28
   0   0 -2229763.24 1505.53
   0   0  23 -124.33  221.65
   0   0  23  478.61  493.58
   0   0  23  576.11  346.21
   0   0  2439060.99 1567.58
   0   0  2441377.57 1680.98
   0   0 -2436280.14 2986.70
   0   0  25  414.99  361.59
   0   0  25 1122.25  382.62
   0   0 -25   60.12  269.18
   0   0 -25 -290.41  568.64
   0   0  26  113.13  344.03
   0   0 -26  303.31  269.52
   0   0 -26  250.97  405.15
   0   0  27  382.04  400.80
   0   0 -27  411.70  543.77
   0   0  28 1031.50  699.88
   0   0 -28  325.40  264.65
   0   0 -28 1147.55  731.47
   0   0  29   76.68  408.34
   0   0 -29  453.88  392.70
   0   0 -29  717.43  280.25
   0   0  3010212.33 1158.98
   0   0 -30 9888.48 1352.28
   0   0 -3011170.10 3176.89
   0   0  31   84.98  669.01
   0   0 -31  594.17  393.92
   0   0 -31  927.82  525.61
   0   0  32 4146.41 1511.30
   0   0 -32 5105.57  874.00
   0   0 -32 4818.38 1371.40
   0   0  33  969.96  582.78
   0   0 -33  457.55  304.34
   0   0 -33  864.67  455.30
   0   0  34 2197.59 1285.38
   0   0 -34 1705.29  864.82
   0   0 -34 3259.76 1410.48
   0   0  35 -447.04  558.69
   0   0 -35  816.78  608.21
   0   0  36  685.24  688.40
   0   0 -36  645.62  440.40
   0   0 -36  441.38  413.36
   0   0 -37  477.28  399.34
   0  -1   312811.26  545.54
   0   1   311938.48  494.03
   0  -1  -313160.63  462.67
   0   1  -314408.27  601.72
   0   1  -313316.61  500.06
   0  -1  -313110.88  571.92
   0  -1   312102.49  681.92
   0   1   311830.66  624.31
   0  -1   4  593.33  341.88
   0   1   4 1130.11  285.44
   0  -1  -4 1121.47  135.54
   0   1  -4 1217.54  376.27
   0   1  -4  830.84  335.54
   0  -1  -4 1116.74  548.92
   0  -1   4  537.12  364.07
   0   1   4  908.79  447.45
   0   1  -5  629.11  229.97
   0  -1   5  424.36  229.38
   0  -1  -5  467.31  165.64
   0   1   5  580.09  237.11
   0   1   5  -54.68  346.83
   0  -1  -5  268.18  242.63
   0   1  -5  163.62  146.94
   0  -1   5  281.17  185.28
   0   1  -5  443.46  339.26
   0   1   5 1083.85  559.05
   0  -1  -5  195.22  473.20
   0   1  -5 -369.52  417.56
   0  -1   5  629.13  473.61
   0   1   5 1046.30  723.33
   0   1  -6 7907.77  854.38
   0  -1   6 8597.20 1081.21
   0  -1  -6 8080.41  567.86
   0   1   6 7664.17  262.83
   0   1   6 8834.30  467.91
   0  -1   6 8007.13  347.03
   0  -1  -6 7843.61  504.84
   0  -1   6 8495.95  895.21
   0   1  -6 8485.93  957.68
   0   1   6 8649.91 1895.95
   0  -1  -6 8170.46 2314.63
   0   1  -6 8624.44  900.30
   0  -1   6 8902.84 1039.54
   0  -1  -6 8278.69  666.22
   0   1   6 7085.42  432.80
   0   1  -7 5902.45  961.12
   0  -1   7 5092.52 1119.53
   0  -1  -7 4886.03  488.20
   0   1   7 4812.26  173.80
   0   1   7 5796.01  801.67
   0  -1   7 5456.26  321.20
   0  -1  -7 4835.41  248.63
   0   1  -7 4827.48  629.93
   0  -1   7 5316.93  760.17
   0   1   7 5003.25  520.72
   0   1  -7 4153.00  341.27
   0  -1  -7 4685.75  389.90
   0   1  -7 5384.50  560.91
   0  -1   7 5758.43  694.05
   0  -1  -7 4299.32  470.73
   0   1   7 4694.85  567.22
   0   1  -8  172.43  191.89
   0  -1   8  272.04  106.85
   0  -1  -8  676.93  128.68
   0   1   8  615.65  153.58
   0   1   8 1035.70  290.99
   0  -1   8  922.17  327.16
   0  -1  -8  916.59  188.48
   0   1  -8  348.19  158.17
   0  -1   8  286.10  143.78
   0   1  -8  333.70  261.22
   0   1   8   66.61  375.25
   0  -1  -8  111.64  382.73
   0   1  -8  643.42  263.88
   0  -1   8  209.20  143.68
   0  -1  -8  340.23  262.77
   0   1   8  332.85  202.85
   0   1  -9 1624.67  317.27
   0  -1  -9 1570.03  383.49
   0  -1   9 2049.63  587.72
   0   1   9 2047.60  362.49
   0   1   9 2153.69  501.27
   0  -1   9 1840.55  577.28
   0  -1  -9 1589.02  357.91
   0   1  -9 1629.13  378.38
   0  -1   9 1977.87  403.60
   0   1  -9 1548.75  287.98
   0   1   9 1350.94  629.17
   0  -1  -9 1761.20  517.85
   0   1  -9 3079.42  829.74
   0  -1   9 1417.80  341.91
   0  -1  -9 1808.77  646.91
   0   1   9 2355.95  576.90
   0   1 -10  269.61  146.69
   0  -1 -10  280.58  121.76
   0  -1  10   97.76  202.90
   0   1  10  129.60   76.32
   0   1  10 -164.89  224.13
   0  -1  10 -173.43  213.75
   0  -1 -10 -151.94  130.17
   0   1 -10  -43.02  201.57
   0  -1  10  -18.92  283.10
   0   1  10  197.17  388.98
   0   1 -10  149.98  148.35
   0  -1 -10  -37.88  291.72
   0   1 -10  324.69  360.44
   0  -1 -10  224.25  175.00
   0  -1  10   23.97  111.83
   0   1  10 -288.34  240.77
   0  -1 -1116380.73  819.29
   0  -1  1115747.06  658.50
   0   1  1114865.15  536.60
   0   1  1115533.67  662.91
   0  -1  1117543.26  730.15
   0  -1 -1115822.27  686.03
   0  -1  1114853.36  673.26
   0   1  1116561.13 1170.34
   0   1 -1114151.92  924.81
   0  -1 -1113409.39  835.11
   0   1 -1115897.29 1112.44
   0  -1 -1114435.84 1226.88
   0   1  1115019.98  667.08
   0  -1 -1220980.79  734.68
   0  -1  1221327.33  666.54
   0   1  1219831.90  704.56
   0  -1  1221332.49  564.70
   0   1  1221960.77  957.13
   0  -1  1222518.46  979.94
   0   1  1222988.95 1155.67
   0   1 -1219400.45 1412.77
   0   1 -1223622.67 1859.32
   0  -1 -1221790.61 1714.28
   0  -1 -1311791.78  948.37
   0  -1  1310288.08  640.79
   0   1  1311607.01  551.91
   0  -1  1311023.73  697.86
   0   1  1310494.05  587.28
   0  -1  1311596.90  594.62
   0  -1  1311336.64  647.51
   0   1  1311412.84  957.94
   0   1 -1310633.25 1190.25
   0   1 -1312713.75  841.92
   0  -1 -1310723.80  952.33
   0  -1 -14 7311.18  614.65
   0  -1  14 6493.77  659.53
   0   1  14 6944.77  357.21
   0  -1  14 5929.91  731.02
   0   1  14 6430.88  415.88
   0  -1  14 6546.28  851.43
   0  -1  14 7652.12 1313.78
   0   1  14 7522.96  970.67
   0   1 -14 7043.11  702.77
   0  -1 -14 7298.79 1255.47
   0  -1 -15 1506.12  305.94
   0  -1  15 1348.86  238.90
   0   1  15 1484.60  244.02
   0  -1  15 1371.63  409.54
   0   1  15 1370.54  413.77
   0  -1  15 1312.04  375.02
   0  -1  15 2054.33  560.12
   0   1  15 1503.05  462.64
   0   1 -15 1139.51  472.09
   0  -1 -15  876.15  322.55
   0  -1  16 6350.47  830.76
   0   1  16 7074.06  379.63
   0  -1  16 7522.92  555.58
   0   1  16 7355.28  534.67
   0   1  16 7994.73 1271.71
   0  -1  16 6564.17  534.33
   0   1  16 7923.37  859.11
   0   1 -16 8435.27 1151.27
   0  -1 -16 8004.66 1759.11
   0  -1  1711892.27  599.29
   0   1  1711917.60  296.60
   0  -1  1711948.28  478.38
   0   1  1711944.69  495.35
   0   1  1713307.61  838.88
   0  -1  1713586.96  757.62
   0   1  1712810.25  858.65
   0   1 -1713314.43 1690.83
   0  -1 -1712173.70 1174.51
   0  -1  18 4118.62  716.03
   0   1  18 4815.38  373.00
   0  -1  18 4384.28 1122.73
   0   1  18 4338.70  867.36
   0   1  18 4006.87 1814.01
   0  -1  18 5358.64  652.07
   0   1  18 5880.44 1801.34
   0   1 -18 6114.45 1582.97
   0  -1 -18 4391.51  773.41
   0  -1  19  144.07   93.16
   0   1  19  126.79   81.51
   0  -1  19  521.79  222.59
   0   1  19   88.03  148.59
   0   1  19  667.87  339.07
   0  -1  19 -566.91  365.24
   0   1  19 -656.97  493.64
   0   1 -19 1198.71  547.93
   0  -1 -19 -180.78  504.93
   0  -1  2022396.65 1362.95
   0   1  2022970.54  971.04
   0   1  2024120.42 1053.37
   0  -1  2024949.63 1180.09
   0   1  2023696.42 1196.38
   0  -1  2021313.28 1023.91
   0   1  2024304.01 1260.12
   0   1 -2025410.77 1152.06
   0   1 -2023642.68 1392.52
   0  -1 -2023706.24 2144.91
   0   1  21 1330.44  335.33
   0   1  21 1630.14  457.40
   0  -1  21 1638.94  768.82
   0  -1  21 2041.64  547.03
   0   1  21 1454.54  761.98
   0   1  21 1788.08  674.66
   0   1 -21 2176.20  582.81
   0   1 -21 1289.39  452.08
   0  -1 -21 1124.26  400.87
   0   1  2219296.07  785.48
   0  -1  2220554.83 1016.67
   0   1  2220715.22 1172.07
   0   1  2224708.76 1369.41
   0  -1  2219698.48 1405.42
   0   1  2223122.73 1894.58
   0   1 -2224617.53 1152.70
   0   1 -2221389.90 1619.40
   0  -1 -2221845.60 1904.42
   0   1  23 5374.31  924.67
   0  -1  23 4124.70 1388.51
   0   1  23 5145.73 1318.33
   0  -1  23 6007.23 1533.56
   0   1  23 5653.63 1248.79
   0   1 -23 4974.74 1578.93
   0   1 -23 5880.99 1429.46
   0  -1 -23 4617.08 1259.65
   0   1  24 3041.68  871.73
   0  -1  24 4411.13 1052.03
   0   1  24 4839.17 1279.21
   0  -1  24 5349.56 1088.13
   0   1  24 6013.93 1513.53
   0   1 -24 4970.87 1331.71
   0   1 -24 4612.58  953.74
   0  -1 -24 4968.96 1076.90
   0  -1  25  240.94  442.68
   0  -1  25 -665.95  518.76
   0   1  25 -550.53  469.76
   0   1 -25   17.44  281.62
   0   1 -25  434.97  241.82
   0  -1 -25 1332.10  681.65
   0  -1  26  259.16  525.95
   0   1  26  -31.02  547.10
   0  -1  26 -260.67  552.06
   0   1  26 -130.67  448.09
   0   1 -26 1179.43  333.23
   0   1 -26  136.49  635.38
   0  -1 -26  393.36  434.77
   0  -1  27 3399.19  911.86
   0   1  27 3112.20  808.94
   0   1 -27 3834.44 1292.81
   0   1 -27 3687.01 1225.98
   0  -1 -27 3909.51 1091.31
   0   1  28 6215.49 2696.53
   0  -1  28 5695.53 1503.90
   0   1 -28 4554.83  764.67
   0  -1 -28 5826.36 2130.42
   0   1 -28 6527.08 2255.05
   0  -1 -28 7734.98 1226.32
   0   1  29 3700.65 1406.83
   0  -1  29 2734.47 1092.16
   0   1 -29 2560.25  936.86
   0  -1 -29 1956.51  585.35
   0   1 -29 1219.42 1151.94
   0  -1 -29 2562.68 1002.97
   0   1  30  -17.79  391.47
   0  -1  30  -15.60  642.41
   0   1 -30  -56.62  404.19
   0  -1 -30 -221.40  433.78
   0   1 -30 2564.74 1096.54
   0  -1 -30  762.64  745.76
   0   1  31  792.10  655.37
   0  -1  31  958.42  786.54
   0   1 -31  200.96  429.98
   0  -1 -31  163.85  167.96
   0   1 -31  899.97  793.18
   0  -1 -31  489.96  361.41
   0  -1  32 2311.90 1322.72
   0   1  32 2111.42  898.79
   0   1 -32 1232.53  798.04
   0  -1 -32 1787.42  841.85
   0   1 -32 2369.78  786.67
   0  -1 -32  664.41  755.05
   0  -1  33 1535.39  856.77
   0   1  33  599.45  837.67
   0   1 -33  -58.42  409.59
   0  -1 -33 1468.77  691.60
   0   1 -33  609.33  778.09
   0  -1 -33  828.86  609.50
   0   1  34  -34.47  593.57
   0  -1  34  966.13  949.79
   0   1 -34  333.21  254.91
   0  -1 -34  139.54  243.19
   0   1 -34-1524.13  779.55
   0  -1 -34  976.70  879.11
   0   1  35 1963.65 1042.44
   0  -1  35 1536.41  818.52
   0   1 -35 1471.76  830.34
   0  -1 -35  952.09  535.02
   0   1 -35 1782.75 1472.32
   0  -1 -35  839.48  845.57
   0   1  36 -275.53  643.03
   0  -1  36  779.72  598.88
   0   1 -36  659.77  188.92
   0  -1 -36  425.62  281.91
   0   1 -37  383.53  433.34
   0  -1 -37  294.39  438.20
   0   2   0 2657.73  394.54
   0   2   0 2352.61  145.24
   0  -2   0 2864.97  181.22
   0  -2   0 2778.08  715.96
   0   2   1 1993.13  539.46
   0   2  -1 2396.03  536.47
   0   2  -1 1595.69  458.89
   0  -2  -1 1355.03  392.48
   0  -2   1 1731.48  393.05
   0  -2  -1 1704.83  459.89
   0  -2   1 1179.89  477.44
   0   2   2 -172.73  172.65
   0   2  -2  281.76  131.04
   0  -2  -2 -153.56   66.82
   0   2  -2   -8.94  180.60
   0  -2  -2 -133.05  264.70
   0  -2   2  -24.01  123.51
   0  -2  -2  241.57  200.73
   0  -2   2  369.24  146.64
   0  -2   3 6198.29  519.53
   0   2   3 5289.27  336.90
   0  -2  -3 6216.01  208.59
   0   2  -3 6339.91  260.59
   0  -2  -3 6544.02  587.74
   0  -2   3 5643.23  291.30
   0  -2   3 6027.10  539.58
   0   2   3 5401.30  393.10
   0  -2   4 1218.58  466.94
   0  -2  -4  754.56  331.37
   0   2   4 1100.65  319.20
   0  -2   4 1029.67  493.44
   0   2   4  834.32  252.52
   0  -2  -4  685.87  190.36
   0  -2   4  238.53  156.88
   0   2  -4  757.62  370.78
   0   2   4 -256.96  975.66
   0  -2  -4 1373.05  753.83
   0   2  -4  914.42  255.91
   0  -2   4  831.81  220.07
   0   2  -4 -386.44  526.01
   0  -2   4  952.66  642.58
   0  -2  -4   97.62  636.39
   0   2   4  161.97  367.34
   0  -2   5  452.50  236.07
   0  -2  -5  881.19  241.00
   0   2   5  942.55  418.47
   0  -2   5  500.96  342.39
   0   2   5  685.58  389.92
   0  -2  -5  293.36  184.12
   0  -2   5  885.38  262.29
   0   2  -5  346.44  373.98
   0   2   5  224.68  192.06
   0  -2  -5  439.58  390.23
   0   2  -5  661.59  318.87
   0  -2   5  100.42  131.38
   0   2  -5  825.08  741.96
   0  -2   5  246.03  282.07
   0  -2  -5  217.76  253.77
   0   2   5  327.47  323.25
   0  -2   6 -302.67  310.35
   0  -2  -6 -203.81  135.38
   0   2   6 -108.55  158.21
   0  -2   6 -479.62  383.60
   0   2   6 -475.83  243.76
   0  -2  -6 -360.13  162.45
   0  -2   6 -307.29  250.05
   0   2  -6 -134.39  256.21
   0   2  -6 -166.21  171.66
   0   2   6 -762.47  648.30
   0  -2  -6 -525.50  453.98
   0   2  -6 -208.98  191.28
   0   2  -6 -474.34  419.96
   0  -2   6  265.21  359.57
   0  -2  -6 -375.47  384.65
   0   2   6    4.59  152.62
   0  -2   7 1149.25  313.10
   0  -2  -7 1254.54  278.52
   0   2   7 1208.94  240.59
   0  -2   7  759.46  375.71
   0   2   7 1292.17  283.19
   0  -2  -7 1429.42  391.47
   0  -2   7 1222.41  418.57
   0   2  -7 1044.95  377.06
   0   2  -7 1150.50  306.47
   0   2   7  827.83  642.68
   0  -2  -7  981.25  414.71
   0   2  -7  620.90  198.32
   0   2  -7 1428.98  392.22
   0  -2   7  955.06  283.06
   0  -2  -7 1121.26  266.68
   0   2   7 1603.02  322.94
   0  -2   8 1547.54  440.76
   0  -2  -8 1631.32  355.37
   0   2   8 1472.81  322.58
   0  -2   8 2734.46  572.65
   0   2   8 1172.49  443.26
   0  -2   8 1991.43  560.48
   0  -2  -8 1919.59  445.68
   0   2  -8 1317.73  273.78
   0   2  -8 1084.48  371.42
   0   2   8 1847.32  719.53
   0  -2  -8  791.68  146.10
   0   2  -8 1325.51  324.36
   0   2  -8 1104.38  397.89
   0  -2   8 1066.77  230.52
   0  -2  -8 2228.70  733.71
   0   2   8 1466.55  542.61
   0  -2   9 3875.37  781.22
   0  -2  -9 3060.86  234.28
   0   2   9 3025.32  388.41
   0  -2   9 3584.55  490.29
   0   2   9 4052.17  943.98
   0  -2   9 3099.51  328.69
   0  -2  -9 3287.44  205.75
   0   2  -9 3460.91  828.33
   0   2  -9 2813.02  714.09
   0   2   9 2798.15 1212.36
   0  -2  -9 2883.75  843.44
   0   2  -9 3317.13  347.97
   0   2  -9 4007.64 1242.90
   0  -2   9 3762.77  418.67
   0  -2  -9 3768.80 1181.04
   0   2   9 3486.38  673.85
   0  -2  1012535.78  718.21
   0  -2 -1012574.56  538.70
   0   2  1011702.27  478.62
   0  -2  1013032.78 1090.04
   0   2  1012255.84  818.08
   0  -2  1013721.04  966.65
   0  -2 -1012458.22  496.40
   0   2 -1010954.58  511.24
   0   2 -1012272.15  958.81
   0   2  1011205.60 1203.86
   0  -2 -1011359.27  888.32
   0   2 -1012442.76  623.59
   0   2 -1013732.79 1233.01
   0  -2  1012776.55 1163.02
   0  -2 -1012305.54  701.26
   0   2  1011542.27  611.30
   0  -2  11  459.46  238.41
   0  -2 -11   39.67  139.90
   0   2  11   64.35   99.34
   0  -2  11  249.05  171.91
   0   2  11  123.37  142.77
   0  -2  11  -28.39  261.44
   0  -2 -11 -134.50  134.91
   0   2  11  960.47  650.11
   0   2 -11  246.45  222.49
   0   2 -11   28.19  257.75
   0   2 -11 -158.12  533.08
   0  -2 -11  407.92  336.60
   0   2  11  201.57  220.68
   0  -2  12 8298.21 1236.54
   0  -2 -12 8164.97  701.56
   0   2  12 8911.95  383.50
   0  -2  1210862.44 1021.80
   0   2  12 8082.58  659.48
   0  -2  12 9394.43  394.72
   0   2 -12 8502.78  538.55
   0   2  12 9902.36  970.32
   0   2 -12 8708.20  383.98
   0   2 -1211145.74 1079.87
   0  -2 -1210587.19  968.72
   0  -2  1377371.21 1459.31
   0   2  1379505.16 1381.06
   0  -2  1379801.16 1550.07
   0   2  1383318.12 1482.11
   0  -2  1378589.44 1721.86
   0   2  1384169.83 1757.56
   0   2 -1377218.36 1450.78
   0   2 -1381436.79 1446.73
   0   2 -1373205.14 2384.32
   0  -2 -1377987.07 1747.53
   0  -2 -14 1174.09  280.76
   0  -2  14 1190.58  303.39
   0   2  14 1215.54  264.60
   0  -2  14 1193.36  387.35
   0   2  14  625.09  338.17
   0  -2  14 1799.91  335.51
   0   2  14  803.46  600.70
   0   2 -14 1200.99  234.10
   0   2 -14  453.59  335.35
   0   2 -14  746.60  427.13
   0  -2 -14 1127.55  423.35
   0  -2 -1514053.85  585.54
   0  -2  1515941.96  625.49
   0   2  1514949.53  500.77
   0  -2  1517279.81  715.96
   0   2  1514994.37 1345.04
   0  -2  1515271.52  629.38
   0   2  1516318.97  900.65
   0   2 -1516898.19  545.05
   0   2 -1515313.10 1146.62
   0  -2 -1515769.86  735.86
   0  -2 -16  298.06   75.05
   0  -2  16  396.16  198.14
   0  -2  16  330.10  165.90
   0   2  16  352.61  196.91
   0  -2  16 -117.97  301.06
   0   2  16  712.65  569.83
   0   2 -16  213.46  167.11
   0   2 -16  219.47  317.20
   0  -2 -16  155.18  210.53
   0   2  1717989.92  774.41
   0  -2  1721368.81 1078.09
   0   2  1718878.62  925.77
   0   2  1718209.03  941.46
   0  -2  1717706.82  945.04
   0   2  1719652.35 1102.62
   0   2 -1717740.52 1237.82
   0   2 -1720826.98 1230.49
   0  -2 -1717900.34 1141.28
   0   2  1812391.68  370.81
   0  -2  1813690.21  798.70
   0   2  1811507.85  677.44
   0   2  1813700.52 2017.97
   0  -2  1811784.67  522.68
   0   2  1812644.60 1112.96
   0   2 -1813335.94 1222.33
   0   2 -1813846.56 1616.01
   0  -2 -1814039.98 1944.88
   0   2  1919253.77  683.09
   0  -2  1920324.81 1562.10
   0   2  1919795.67  662.78
   0   2  1919648.43 1207.21
   0  -2  1919838.73  769.09
   0   2  1921940.15 1058.34
   0   2 -1919572.58  764.32
   0   2 -1922763.17 1856.01
   0  -2 -1920486.39  917.12
   0   2  2023893.28 1061.41
   0  -2  2027544.64 1843.01
   0   2  2025992.50 1163.79
   0   2  2026420.36 2002.29
   0   2  2027055.04 2207.28
   0   2 -2027433.89 1981.48
   0   2 -2026609.69 2240.69
   0  -2 -2028564.89 2377.59
   0   2  2121408.45  901.13
   0   2  2123211.17 1049.13
   0  -2  2126546.43 1485.05
   0   2  2126856.53 1506.04
   0   2  2124297.00 1928.01
   0   2 -2124128.75 1302.59
   0   2 -2124450.08 3483.40
   0  -2 -2123699.83 1756.27
   0   2  2211612.00  358.51
   0  -2  2213141.26  763.40
   0   2  2211324.20  849.12
   0   2  2211231.94 1061.72
   0  -2  2211648.14 1346.48
   0   2  2213683.12 1548.48
   0   2 -2212890.29  620.34
   0   2 -2213648.20 1193.75
   0  -2 -2216303.45 1723.17
   0   2  23 1578.75  396.99
   0  -2  23 2309.56  620.60
   0   2  23 1715.00  521.49
   0   2  23 2270.99  798.38
   0   2 -23 2668.97  696.57
   0   2 -23 2385.63  616.93
   0  -2 -23 3541.12  740.94
   0  -2  24 6453.22 1504.72
   0   2  24 7426.86 1788.21
   0   2  24 7947.60  783.39
   0   2 -24 7018.19 1965.92
   0   2 -24 8119.60 1104.12
   0  -2 -24 7745.81 2160.68
   0  -2  25  430.84  181.99
   0   2  25  818.78  478.28
   0   2  25  599.27  459.58
   0   2 -25   37.23  166.29
   0   2 -25  231.49  294.15
   0  -2 -25  446.28  328.31
   0  -2  26  938.46  370.44
   0   2  26  518.99  702.92
   0   2  26 -364.15  487.91
   0   2 -26 1053.36  550.01
   0   2 -26   49.36  423.39
   0  -2 -26  582.77  422.11
   0  -2  27  583.59  175.21
   0   2  27  175.02  835.64
   0   2  27  413.41  338.34
   0   2 -27  506.45  340.39
   0   2 -27 -422.72  597.53
   0  -2 -27  476.89  235.28
   0   2  28 1011.19  248.13
   0  -2  28  540.48  264.92
   0   2  28  376.74  254.70
   0   2 -28 1272.64  493.93
   0   2 -28 1701.13  586.07
   0  -2 -28  947.56  623.78
   0   2  29 1765.76 1178.53
   0  -2  29 2002.22  851.63
   0   2 -29 1806.34  627.46
   0   2 -29 4662.49  950.69
   0  -2 -29 1982.73  585.23
   0   2  30  578.26  339.38
   0  -2  30  523.72  492.31
   0   2 -30  304.45  208.20
   0  -2 -30  805.55  288.24
   0   2 -30 -206.37  745.86
   0  -2 -30  398.90  417.41
   0   2  31  975.40  508.58
   0  -2  31  835.88  500.95
   0   2 -31 1064.30  640.16
   0  -2 -31  649.49  648.81
   0   2 -31  737.66  590.93
   0  -2 -31  673.16  694.76
   0   2  32  512.85  272.03
   0  -2  32  601.69  463.04
   0   2 -32  735.60  381.33
   0  -2 -32  807.30  506.47
   0   2 -32  552.00  492.38
   0  -2 -32  809.47  679.29
   0   2  33  688.32 1257.25
   0  -2  33  -68.74  660.99
   0   2 -33  776.88  591.75
   0  -2 -33 1295.25  619.68
   0   2 -33 1072.31  680.66
   0  -2 -33 1667.93 1170.47
   0   2  34 3842.93 2081.31
   0  -2  34 5730.93 1815.80
   0   2 -34 3720.28 2042.64
   0  -2 -34 4853.65 2426.17
   0   2 -34 4909.56 1543.31
   0  -2 -34 4968.31 1538.69
   0   2  35  725.16  706.29
   0  -2  35  -33.03  637.79
   0   2 -35  353.77  479.07
   0  -2 -35  462.51  524.81
   0   2 -35  537.37  509.35
   0  -2 -35  605.32  611.91
   0   2  36  292.69  423.48
   0  -2 -37  148.43  423.22
   0  -3   0   31.35  218.65
   0   3   0  647.53  345.71
   0  -3   0 1229.61  362.83
   0   3   0  624.71  338.18
   0   3   0  761.47  503.35
   0  -3   0  823.06  529.19
   0   3   0  643.89  373.29
   0  -3   0  851.77  834.63
   0  -3  -1 7082.11  949.52
   0   3   1 7256.71  560.45
   0   3  -1 6410.09  671.99
   0  -3  -1 8412.35  590.93
   0  -3   1 9609.98  793.88
   0   3  -1 9265.58  935.44
   0  -3  -1 8628.87  532.82
   0   3   111558.27 2761.25
   0  -3  -1 8967.72  880.17
   0   3  -1 9756.73  922.93
   0  -3   1 8606.06  648.75
   0   3   1 9058.95 2058.64
   0  -3  -1 8747.34 1926.20
   0   3  -1 8649.93 2732.71
   0  -3   1 7866.74  917.84
   0  -3  -2 8704.23  599.10
   0   3   2 9262.64  601.81
   0  -3   210126.04 1212.40
   0  -3  -2 9106.35  412.11
   0  -3   2 9623.58 1293.27
   0   3  -211837.11 1661.23
   0   3   212421.62 2777.33
   0  -3  -211285.05 1050.59
   0   3  -211197.44 1067.77
   0  -3   2 9827.41  578.27
   0   3   210720.85  988.45
   0  -3  -210097.36  920.33
   0   3  -2 9816.95 2556.52
   0  -3   210744.79  958.40
   0  -3   3216909.7 3877.76
   0   3  -3206527.9 3692.16
   0  -3   3207300.9 3664.23
   0  -3  -3208365.7 3842.68
   0   3  -3224778.7 4073.36
   0  -3   3214781.9 3864.84
   0  -3   410387.08 1327.36
   0  -3  -4 9273.94  448.68
   0   3   4 9899.71  486.93
   0  -3   410496.48 1462.29
   0   3   4 9270.71  716.61
   0  -3  -4 9607.84  372.42
   0  -3   4 9787.16  395.44
   0   3  -4 9084.86  442.14
   0   3   410025.85 1337.68
   0  -3  -4 9628.37  634.87
   0   3  -4 9167.68  494.08
   0  -3   4 8875.90  321.80
   0  -3  -4 9998.17  868.01
   0   3  -4 8486.82  753.95
   0  -3   4 8796.36  991.45
   0  -3  -4 9201.26  535.55
   0  -3   520817.47  920.65
   0  -3  -521659.48  839.65
   0   3   521020.96  806.47
   0  -3   522135.40  638.60
   0   3   520399.37  774.19
   0  -3  -520617.19  728.90
   0  -3   522509.46  392.52
   0   3  -522392.73  414.83
   0   3   518963.97  901.80
   0  -3  -519541.84  871.68
   0   3  -519785.13  755.07
   0  -3   520792.58  798.44
   0   3  -518189.23 1625.01
   0  -3   520953.31 1033.05
   0  -3  -521534.10  937.17
   0   3   521672.14  917.37
   0  -3   6 1511.74  412.24
   0  -3  -6 1173.98  322.39
   0   3   6 1435.94  324.56
   0  -3   6 1993.78  723.40
   0   3   6 1399.75  287.44
   0  -3  -6 1293.98  248.61
   0  -3   6 1463.94  385.35
   0   3  -6 1607.81  458.12
   0   3   6 1302.56  475.88
   0  -3  -6 1218.47  535.40
   0   3  -6 1547.10  278.88
   0  -3   6  972.36  272.31
   0   3  -6 1287.45  463.36
   0  -3   6 1684.37  447.02
   0  -3  -6 1665.08  453.50
   0   3   6 1499.40  471.55
   0  -3   726481.82 1088.19
   0  -3  -725391.61  896.64
   0   3   724174.29 1006.14
   0  -3   723752.21 1052.58
   0   3   724816.27  874.05
   0  -3  -724067.84  820.53
   0  -3   725717.24  875.64
   0   3  -723098.15  397.69
   0   3   725543.59 1089.52
   0  -3  -725996.60 1843.58
   0   3  -724327.97  952.64
   0   3  -725092.51 1063.34
   0  -3   725330.93  974.26
   0  -3  -724942.27 1674.90
   0  -3   8  841.63  265.58
   0  -3  -8  876.87  144.50
   0   3   8  910.49  255.10
   0  -3   8  199.59  222.60
   0   3   8  699.11  158.55
   0  -3  -8  849.10  184.19
   0  -3   8 1133.11  342.10
   0   3  -8  463.97  235.23
   0   3  -8  749.12  164.94
   0   3   8  373.57  275.41
   0  -3  -8  877.53  347.66
   0   3  -8 1040.78  212.75
   0   3  -8 1196.33  476.71
   0  -3   8  869.00  336.39
   0  -3  -8 1127.19  371.73
   0   3   8  905.25  353.45
   0  -3   952617.42 2033.25
   0  -3  -956379.07  463.95
   0   3   955225.14  720.37
   0  -3   956591.55  882.61
   0   3   953866.08 1798.75
   0  -3  -952884.76 1701.54
   0   3  -954002.97 1783.01
   0   3  -953156.18 1741.86
   0   3   955666.02 1595.28
   0  -3  -951502.47 1884.64
   0   3  -952399.03 1792.97
   0   3  -954836.05  993.76
   0  -3  10  545.95  331.42
   0  -3 -10  699.52  178.87
   0   3  10  455.45  101.83
   0  -3  10  694.23  408.15
   0   3  10  362.23  211.21
   0  -3  10  351.77  218.64
   0  -3 -10  667.20  139.83
   0   3 -10  566.60  276.81
   0   3 -10  212.05  200.34
   0   3  10 1060.03  583.57
   0   3 -10  774.63  305.07
   0   3 -10  817.16  494.80
   0  -3 -10  408.85  369.49
   0   3  10  468.56  315.18
   0  -3  11 1456.86  431.55
   0  -3 -11 1817.52  352.03
   0   3  11 1365.14  297.29
   0  -3  11 2192.14  619.91
   0   3  11 2085.05  465.12
   0  -3  11 2855.49  615.46
   0  -3 -11 1905.73  389.29
   0   3 -11 2183.23  502.77
   0   3  11 1589.16  456.90
   0   3 -11 1214.56  274.00
   0   3 -11  962.26  782.35
   0  -3 -11 1816.87  429.26
   0  -3  12  781.77  298.30
   0  -3 -12  564.72  119.22
   0   3  12  307.52  108.59
   0  -3  12  450.80  284.92
   0   3  12  358.18  219.66
   0  -3  12  582.29  224.27
   0  -3 -12  506.71  110.91
   0   3 -12  585.31  174.98
   0   3  12  372.80  632.60
   0   3 -12  300.87  134.32
   0   3 -12  983.14  438.85
   0  -3 -12 1105.36  624.70
   0  -3  13 3918.44  900.71
   0  -3 -13 3592.04  368.03
   0   3  13 4605.01  374.75
   0  -3  13 4704.62 1536.15
   0   3  13 5165.92 1256.45
   0  -3  13 5849.47  683.43
   0   3  13 3814.15 1529.53
   0   3 -13 4349.56  356.28
   0   3 -13 3536.39  951.61
   0   3 -13 5119.57 1087.32
   0  -3 -13 5038.90 1419.59
   0  -3 -14 2133.97  395.51
   0   3  14 2219.96  480.61
   0  -3  14 2786.92  945.15
   0   3  14 3321.37  859.29
   0  -3  14 2643.76  666.04
   0   3  14 2147.60  763.31
   0   3 -14 2029.55  427.40
   0   3 -14 2094.65  499.49
   0   3 -14 2812.45  655.47
   0  -3 -14 3036.86  829.12
   0  -3 -15   60.75   58.33
   0   3  15  149.94  132.14
   0  -3  15  355.41  249.80
   0   3  15  297.69  336.36
   0  -3  15  408.06  176.87
   0   3  15   96.86  400.07
   0   3 -15  142.75  143.58
   0   3 -15  420.91  434.20
   0  -3 -15   21.49  264.91
   0  -3 -16 2319.28  565.24
   0   3  16 1741.51  333.97
   0  -3  16 1708.58  468.37
   0   3  16 1219.83  532.07
   0  -3  16 2455.19  683.30
   0   3  16 2001.49  625.06
   0   3 -16 1366.42  584.12
   0   3 -16 2453.44  771.91
   0  -3 -16 2029.06  556.33
   0   3  1719996.68  903.53
   0  -3  1721348.23 1037.91
   0   3  1721919.81 1075.16
   0  -3  1719539.26 1003.85
   0   3  1722597.39 2716.59
   0   3 -1722180.60 1168.01
   0   3 -1722071.84 1996.02
   0  -3 -1721845.68 1828.61
   0   3  18 4990.17  313.41
   0  -3  18 3919.80 1342.71
   0   3  18 5307.86  511.60
   0   3  18 6391.84 1579.91
   0  -3  18 6034.96  604.40
   0   3  18 5858.53 1821.05
   0   3 -18 5130.38  402.24
   0   3 -18 6212.04 1341.27
   0  -3 -18 6861.52 1152.40
   0   3  19 3589.71  576.89
   0  -3  19 4067.90 1060.26
   0   3  19 4049.11  531.88
   0   3  19 5577.30 1458.84
   0  -3  19 5572.30  965.99
   0   3  19 4767.01 1197.77
   0   3 -19 3854.44  937.18
   0   3 -19 3606.03  946.23
   0  -3 -19 6091.93 1355.53
   0   3  20  588.46  115.47
   0   3  20  849.73  579.71
   0  -3  20 1159.11  402.18
   0   3  20  799.75  580.86
   0   3 -20  808.60  478.81
   0   3 -20  999.20  733.56
   0  -3 -20  927.13  301.58
   0   3  21194249.1 7313.45
   0   3  21181112.6 6816.46
   0  -3  21206387.6 8425.26
   0   3  21184466.4 7128.01
   0  -3  21185680.6 7341.58
   0   3  21203707.1 8102.25
   0   3 -21209286.3 8030.02
   0   3 -21199907.4 7850.44
   0  -3 -21204770.9 7998.69
   0  -3  22 8882.93 2033.27
   0   3  22 8882.85 2641.91
   0  -3  22 8887.63  562.87
   0   3  22 9684.89 1504.81
   0   3 -22 9228.07 3090.49
   0   3 -22 8333.53 2349.76
   0  -3 -2210476.96 1100.13
   0  -3  23118016.3 3982.14
   0   3  23117333.9 4400.18
   0  -3  23127250.0 4213.29
   0   3  23115883.2 4320.59
   0   3 -23112769.6 4246.94
   0   3 -23112091.7 3985.44
   0  -3 -23117998.0 4006.52
   0  -3  24 1863.99  543.09
   0   3  24 1159.28  409.77
   0   3  24 1723.76  710.15
   0   3 -24 1360.84  439.18
   0   3 -24  220.81  648.64
   0  -3 -24 1727.17 1071.40
   0  -3  25  639.89  343.73
   0   3  25  175.82  298.48
   0  -3  25  348.18  352.74
   0   3  25  -82.29  516.24
   0   3 -25 -170.75  339.95
   0   3 -25  511.48  721.30
   0  -3 -25  -43.52  484.48
   0  -3  26   88.83  106.37
   0   3  26   98.49  543.67
   0  -3  26   80.48  300.07
   0   3  26   -4.61  483.52
   0   3 -26 -213.21  368.88
   0   3 -26  916.08  353.78
   0  -3 -26  345.24  459.89
   0  -3  27 1515.53  755.42
   0   3  27 1076.87  403.54
   0  -3  27 1068.81  397.37
   0   3  27 1369.47  524.79
   0   3 -27 1652.10  574.45
   0   3 -27 1274.65  944.84
   0  -3 -27 2195.58  825.36
   0  -3  28 1744.05  816.14
   0   3  28 1275.43  882.12
   0  -3  28 2797.92  913.89
   0   3  28 1942.44  482.60
   0   3 -28 1709.49  794.67
   0   3 -28 2105.03  780.02
   0  -3 -28 1982.19  741.04
   0   3  29  292.53  307.88
   0  -3  29 1761.34  673.50
   0   3  29  630.59  199.65
   0   3 -29  338.71  514.74
   0   3 -29 1175.78  557.05
   0  -3 -29  808.26  503.67
   0   3  30  637.33  534.89
   0  -3  30 1202.65  535.96
   0   3  30  887.59  509.96
   0   3 -30 1796.99  657.61
   0   3 -30  210.49  849.41
   0  -3 -30  634.24  765.75
   0   3  31    5.55  332.22
   0  -3  31  444.62  759.00
   0   3 -31  557.35  285.47
   0   3 -31  511.86  772.82
   0  -3 -31  710.01  626.20
   0   3  32  293.79  386.95
   0   3 -32  285.91  505.72
   0  -3 -32  279.66  241.27
   0   3 -32  581.53  736.77
   0  -3 -32  560.29  279.08
   0   3  33  186.65  768.33
   0   3 -33  807.41  497.63
   0  -3 -33  -89.16  292.10
   0   3 -33  443.77  555.63
   0  -3 -33  905.11  574.57
   0   3  34  431.94  414.98
   0   3 -34  493.45  319.06
   0  -3 -34  387.16  495.00
   0   3 -34  615.20  892.69
   0  -3 -34  577.48  360.84
   0   3  35  812.35  957.78
   0  -3 -35 1992.22  627.50
   0   3 -35 2161.71 1246.34
   0  -3 -35 1055.01  450.63
   0   3  36 1591.18 1038.71
   0  -3 -36  401.20  563.95
   0   4   0213046.1 3802.29
   0  -4   0195218.0 3818.62
   0   4   0202165.3 3789.45
   0  -4  -1142468.3 2632.34
   0  -4   1139451.9 2606.68
   0   4   1142089.5 2613.30
   0  -4  -1138050.5 2400.22
   0   4  -1138209.2 2424.24
   0  -4  -1138871.2 2404.52
   0   4   1145307.9 2710.53
   0   4  -1139080.9 2555.85
   0  -4  -1138928.3 2547.69
   0  -4   1137039.4 2607.69
   0   4   1144139.8 2784.01
   0  -4  -1143408.5 2751.25
   0   4  -1139866.2 2700.24
   0  -4   1134634.6 2642.99
   0  -4  -215609.95  723.06
   0  -4   214855.54  711.99
   0   4   216741.76  832.56
   0   4  -214196.08  847.20
   0  -4  -214476.67  617.14
   0  -4   214377.82  565.44
   0   4  -214607.53  636.35
   0   4   217376.40 2060.84
   0  -4  -216202.09 1135.50
   0   4  -215166.79 1154.81
   0  -4   214868.62  685.53
   0   4   214017.31  987.06
   0  -4  -215784.65  843.50
   0   4  -215574.02  834.53
   0  -4   215164.83  930.58
   0  -4  -3197995.6 3532.37
   0   4   3193581.3 3433.93
   0   4  -3192295.0 3471.36
   0   4   3198468.7 3738.44
   0  -4  -3192059.4 3452.49
   0  -4   3189933.4 3362.82
   0   4   3192386.1 3545.16
   0  -4  -3196342.3 3827.62
   0   4  -3197759.8 3671.47
   0  -4   3196500.6 3612.50
   0  -4   4 4703.11 1036.33
   0  -4  -4 3850.90  310.57
   0   4   4 4494.32  294.94
   0  -4   4 4587.35  435.26
   0   4   4 4003.11  232.53
   0  -4  -4 4288.40  273.71
   0  -4   4 4769.04  310.39
   0   4  -4 4245.78  310.38
   0   4   4 5082.44 1464.73
   0  -4  -4 3910.92  461.85
   0   4  -4 4803.54  627.82
   0  -4   4 4552.52  450.97
   0  -4  -4 4858.04  895.97
   0   4  -4 3985.03 1427.32
   0  -4   4 4920.25  558.52
   0  -4  -4 4111.54 1154.21
   0  -4   550461.64 1806.51
   0  -4  -549912.31 1812.77
   0   4   549157.20 1644.28
   0  -4   547937.18 2015.31
   0   4   550573.63 1715.66
   0  -4   551453.78 1656.71
   0   4  -551206.42 1692.39
   0   4   551967.89 1848.22
   0  -4  -549180.88 1734.91
   0   4  -550887.34 1795.71
   0  -4   548458.04 1636.46
   0  -4  -550776.69 1794.21
   0   4  -553349.35 1920.67
   0  -4   548535.46 1723.16
   0  -4  -551826.45 1824.13
   0  -4   614904.87  980.33
   0  -4  -614967.34  777.03
   0   4   615442.51 1010.61
   0  -4   616748.60 1430.64
   0   4   614043.45  599.51
   0  -4  -614217.54  590.74
   0  -4   616689.44  695.34
   0   4  -614559.62  604.10
   0   4   614075.04 1195.52
   0  -4  -616164.64 1225.75
   0   4  -614562.65  708.48
   0  -4   614821.36  698.86
   0  -4  -614720.48  750.72
   0   4  -615279.97 1432.82
   0  -4   614949.34 1082.07
   0  -4  -614197.46  931.27
   0  -4   722750.00  989.56
   0  -4  -726864.21 1079.92
   0   4   724247.23  871.45
   0  -4   723725.02 1522.58
   0   4   724636.37 1048.05
   0  -4  -725174.10  901.72
   0  -4   725864.68  895.02
   0   4  -723298.99  842.43
   0   4   727249.81 1224.00
   0  -4  -723489.91 1062.35
   0   4  -725678.27 1224.95
   0  -4   724493.07  889.19
   0   4  -722050.18 1398.71
   0  -4   722979.76 1010.13
   0  -4  -722970.70  722.60
   0   4   721614.66 1069.39
   0  -4   8 3947.29  951.09
   0  -4  -8 4453.44  708.56
   0   4   8 3629.45  343.64
   0  -4   8 4353.19 1805.76
   0   4   8 4029.21  392.66
   0  -4  -8 4041.74  325.22
   0  -4   8 4229.42  326.02
   0   4  -8 3663.29  310.03
   0   4   8 3468.62 1089.84
   0  -4  -8 3808.44  837.35
   0   4  -8 4362.58  855.38
   0  -4   8 4175.50  273.91
   0   4  -8 3294.83 1483.33
   0  -4   8 3544.03  431.31
   0  -4  -8 5419.74 1469.58
   0   4   8 3268.37  678.95
   0  -4   917389.83 1213.76
   0  -4  -916613.52  742.87
   0   4   914786.56  813.33
   0  -4   915253.90 1269.74
   0   4   914019.36  600.36
   0  -4  -915318.97  579.63
   0  -4   916706.64  689.16
   0   4  -914889.52  641.11
   0   4  -914817.53  689.63
   0   4   915902.60 1122.14
   0   4  -915273.94 1236.78
   0   4  -914351.07 1110.32
   0  -4  -916834.67  914.27
   0  -4  10 5932.36  558.74
   0  -4 -10 7645.13  470.09
   0   4  10 6899.52  439.53
   0  -4  10 6579.02  729.18
   0   4  10 6441.79  913.06
   0  -4  10 7888.22  608.58
   0  -4 -10 6589.62  241.29
   0   4 -10 6063.84  270.13
   0   4  10 4809.20 1603.09
   0   4 -10 6506.02  791.30
   0   4 -10 7319.35 1987.35
   0  -4 -10 6245.45  717.68
   0  -4 -11 1002.70  220.73
   0   4  11  698.46  191.68
   0  -4  11  923.86  417.76
   0   4  11 1326.82  647.00
   0  -4  11  433.19  237.38
   0  -4 -11  859.13  195.98
   0   4 -11 1031.25  349.04
   0   4  11  789.89  565.29
   0   4 -11  920.43  284.81
   0   4 -11 1279.96  861.42
   0  -4 -11  998.70  555.89
   0  -4 -12 2195.41  310.75
   0   4  12 2058.49  385.97
   0  -4  12 2751.48  660.73
   0   4  12 2511.58  701.76
   0  -4  12 2674.30  992.76
   0  -4 -12 1783.56  477.25
   0   4 -12 1916.70  458.78
   0   4  12 2755.78  676.98
   0   4 -12 2430.05  584.15
   0   4 -12 2314.14  874.44
   0  -4 -12 2669.42  868.61
   0  -4 -13 7593.37  335.78
   0   4  13 7129.30  430.00
   0  -4  13 8108.88  602.75
   0   4  13 8087.66  577.01
   0  -4  13 8055.06  570.58
   0   4 -13 6262.76  769.15
   0   4  13 8389.23 2004.12
   0   4 -13 7097.49  902.06
   0   4 -13 8202.67 1999.41
   0  -4 -13 7075.00  825.00
   0  -4 -14 4981.53  453.09
   0   4  14 4760.37  385.04
   0  -4  14 5148.65 1709.47
   0   4  14 5601.83  953.24
   0  -4  14 5358.62  561.59
   0   4 -14 4670.37  947.18
   0   4  14 4700.47  929.61
   0   4 -14 5890.60  933.54
   0   4 -14 5991.98 1326.09
   0  -4 -14 7057.99 1840.83
   0  -4 -15  202.59  123.24
   0  -4  15  544.68  414.68
   0   4  15 -305.51  305.38
   0  -4  15  416.70  256.23
   0   4 -15  345.23  235.20
   0   4  15  407.30  316.70
   0   4 -15  640.55  202.66
   0   4 -15  909.59  523.36
   0  -4 -15  550.27  390.10
   0  -4 -16  418.89  117.31
   0   4  16  751.93  167.53
   0  -4  16  611.95  383.49
   0   4  16  303.78  171.16
   0  -4  16  849.54  355.77
   0   4  16  468.93  475.76
   0   4 -16  685.55  280.50
   0   4 -16 1123.00  248.32
   0  -4 -16 1186.71  412.81
   0  -4 -17 1425.73  260.99
   0  -4  17 2117.05  598.33
   0   4  17 1892.43  536.81
   0  -4  17 2472.53  717.79
   0   4  17 2649.27  727.07
   0   4 -17 2365.77  854.39
   0   4 -17 2918.18  821.19
   0  -4 -17 2801.25  793.28
   0  -4  18 1893.02  466.54
   0   4  18 1447.59  379.02
   0  -4  18 2912.53  688.10
   0   4  18 2201.78  644.09
   0   4 -18 1344.72  399.65
   0   4 -18 1201.03  826.35
   0  -4 -18  704.48  331.88
   0  -4  19 5018.71 1787.01
   0   4  19 3001.99  749.70
   0  -4  19 5327.05 1035.25
   0   4  19 3564.59 1141.66
   0   4 -19 3738.90 1266.29
   0   4 -19 4114.04 1011.90
   0  -4 -19 4343.58 1117.79
   0  -4  2014836.44  789.78
   0   4  2015203.44  951.70
   0  -4  2015919.10  951.85
   0   4  2012849.83 2783.10
   0   4 -2014834.06  731.64
   0   4 -2015861.22 1350.36
   0  -4 -2016949.43 2449.57
   0  -4  2126959.04 1308.40
   0   4  2129099.46 1359.50
   0  -4  2130318.32 1327.61
   0   4  2127780.64 2516.85
   0   4 -2126929.80 1320.67
   0   4 -2127123.52 1964.24
   0  -4 -2127965.29 2560.25
   0  -4  22 5179.57 1363.99
   0   4  22 5800.76 1291.94
   0  -4  22 5421.54 1402.94
   0   4  22 5445.76 1268.27
   0   4 -22 4444.20 1360.65
   0   4 -22 5096.05  875.71
   0  -4 -22 6257.97 1697.95
   0  -4  23 1510.60  387.00
   0   4  23 2545.61  965.65
   0  -4  23 1919.92  483.92
   0   4  23 2383.45  681.10
   0   4 -23 1712.84  527.11
   0   4 -23 1457.38  594.25
   0  -4 -23  990.95  603.37
   0  -4  24 2367.32  711.59
   0   4  24 1273.94  568.20
   0  -4  24 2139.55  686.26
   0   4  24 2034.38  563.04
   0   4 -24 2289.50  749.60
   0   4 -24  765.10  774.05
   0  -4 -24 1511.24  739.91
   0  -4  25 9153.38 2031.11
   0   4  2514673.30 2445.99
   0  -4  2515142.31 1896.37
   0   4  2512550.60  856.67
   0   4 -2513281.76 1782.88
   0   4 -2511609.58 2415.49
   0  -4 -2515830.44 1537.82
   0  -4  26 4298.60 1231.31
   0   4  26 3700.39 1601.47
   0  -4  26 4244.72  952.51
   0   4  26 5633.00  902.03
   0   4 -26 4721.98 1097.05
   0   4 -26 4357.11 1341.54
   0  -4 -26 5507.02 1565.06
   0  -4  27  628.42  382.42
   0   4  27  757.51  461.03
   0  -4  27  985.56  691.57
   0   4  27 1690.04  528.98
   0   4 -27 1786.73  513.94
   0   4 -27  995.00  362.33
   0  -4 -27 1446.65  649.77
   0  -4  28  183.10  342.68
   0   4  28  224.65  307.60
   0  -4  28  902.88  544.80
   0   4  28  302.20  320.69
   0   4 -28  156.14  345.67
   0   4 -28 -165.52  585.49
   0  -4 -28 -157.10  499.64
   0   4  29  476.48  664.23
   0  -4  29  552.97  539.01
   0   4  29  598.15  298.12
   0   4 -29 -200.03  390.16
   0  -4 -29 1334.06  495.37
   0   4  30 1038.66  535.15
   0  -4  30  891.36  701.41
   0   4  30  838.46  467.84
   0   4 -30  430.33  281.95
   0   4 -30 -390.47  774.87
   0  -4 -30 -282.54  530.69
   0   4  31  697.27  416.96
   0  -4  31   71.63  471.22
   0   4  31  -44.77  413.48
   0   4 -31  216.70  295.87
   0   4 -31  841.26  585.55
   0  -4 -31  588.08  649.86
   0   4  32  712.09  327.77
   0  -4  32  633.68  674.29
   0   4  32  658.21  399.76
   0   4 -32  428.83  265.92
   0   4 -32  835.03  944.97
   0  -4 -32  799.16  797.20
   0   4  33  556.67  259.18
   0  -4  33 -311.06  529.84
   0  -4 -33  124.92  367.08
   0   4 -33 1132.74  870.56
   0  -4 -33  754.00  547.35
   0   4  34  353.71  409.77
   0  -4  34  315.43  569.47
   0  -4 -34  116.93  263.98
   0   4 -34  169.62 1096.12
   0  -4 -34  884.22  609.97
   0   4  35  853.26  724.55
   0  -4  35  992.87  791.29
   0  -4 -35  297.07  307.06
   0  -4 -35  891.05  627.63
   0   4  36 1920.45  814.90
   0  -4 -36 1029.94  648.79
   0  -5   0  142.39  326.53
   0   5   0 -319.96  268.55
   0  -5   0   42.87   51.84
   0   5   0 -111.55  116.36
   0   5   0  309.68  161.39
   0  -5   0    4.47  253.84
   0   5   0 -204.52  544.44
   0  -5   0  -56.10  190.15
   0  -5  -175639.10 1879.40
   0   5   174352.38 1497.72
   0   5  -169127.71 1449.66
   0  -5  -170522.97 1305.46
   0  -5   172346.36 1397.15
   0  -5  -170773.40 1390.12
   0   5  -168179.84 1274.98
   0   5   174949.67 1960.15
   0   5  -172943.90 1654.96
   0  -5  -172279.89 1736.97
   0  -5   173889.04 1753.80
   0   5   169761.90 2391.75
   0   5  -174572.73 1881.32
   0  -5  -170205.97 1650.80
   0  -5   169233.90 2220.38
   0  -5  -2229261.7 4153.12
   0   5   2223593.1 4003.92
   0   5  -2241152.2 4388.54
   0   5  -2226644.0 3934.98
   0   5   2230346.1 4137.98
   0   5  -2233528.3 4112.81
   0  -5  -2232914.2 4211.59
   0  -5   2225441.2 3985.95
   0   5   2226520.8 4176.78
   0  -5  -2223076.4 4139.95
   0   5  -2230974.4 4470.91
   0  -5   2223481.8 4195.99
   0  -5  -3 4716.04  730.86
   0  -5   3 5017.10  769.95
   0   5   3 4595.79  623.58
   0   5  -3 4468.54 1268.35
   0  -5  -3 4495.05  314.41
   0  -5   3 4572.25  247.21
   0   5  -3 5362.32  319.29
   0   5   3 5698.37 1752.72
   0  -5  -3 5283.68  515.97
   0   5  -3 4729.89  423.03
   0  -5   3 4802.19  821.43
   0   5   3 5821.56 1453.88
   0  -5  -3 5485.53  895.11
   0   5  -3 6596.34 1481.75
   0  -5   3 3381.11  975.47
   0  -5   414228.06 1643.71
   0  -5  -414081.19  710.41
   0   5   414783.69  661.82
   0  -5   414250.65  878.83
   0   5   414535.38  613.26
   0  -5  -413945.09  521.71
   0  -5   414924.95  654.70
   0   5  -414343.71  667.12
   0   5   413343.95  905.47
   0  -5  -413028.25  691.17
   0   5  -414889.29  670.61
   0  -5   413947.69  666.22
   0   5   413330.82  836.42
   0  -5  -415321.21 1078.58
   0   5  -415699.45 1310.15
   0  -5   413705.91  749.08
   0  -5   5 8188.90 1859.51
   0  -5  -5 7040.89  647.29
   0   5   5 6721.42  505.25
   0  -5   5 7090.73  577.97
   0   5   5 7216.11  361.54
   0  -5  -5 6747.99  371.89
   0  -5   5 7019.80  309.34
   0   5  -5 7818.23  641.95
   0   5   5 6525.73  584.54
   0  -5  -5 7563.85 1274.37
   0   5  -5 6480.60  360.22
   0  -5   5 6832.97  779.43
   0  -5  -5 7188.06 1682.50
   0   5  -5 7115.96 2437.18
   0  -5   5 7614.70  608.58
   0  -5  -5 7425.25 1174.99
   0  -5   6103833.6 1995.21
   0  -5  -6106058.1 1891.71
   0  -5   6102568.6 2003.21
   0   5   699145.87 1859.19
   0   5   6101302.4 1756.30
   0  -5  -6104070.6 1637.17
   0  -5   6106454.3 1891.52
   0   5  -6100519.3 1688.36
   0   5   699386.27 1932.51
   0  -5  -696399.01 2249.70
   0   5  -6105357.1 1814.96
   0  -5   6105561.6 1757.00
   0  -5  -699856.30 1967.54
   0   5  -6108258.3 3011.67
   0  -5   697771.06 1965.07
   0  -5  -6105103.0 2235.53
   0  -5  -720541.67 1573.31
   0   5   718299.48 4044.92
   0  -5   719626.73 1212.36
   0   5   720385.69 1162.77
   0  -5  -719249.11  717.17
   0  -5   720414.64  757.40
   0   5  -718985.81  772.38
   0   5   722608.61 1286.94
   0  -5  -721291.19 1739.01
   0   5  -719943.13  942.41
   0  -5   719093.50  830.06
   0   5  -718072.29 1098.92
   0  -5  -719175.44 1027.62
   0  -5  -8143541.5 2518.05
   0   5   8136945.4 2300.90
   0  -5   8135022.4 2497.47
   0   5   8141893.4 2385.05
   0  -5   8142255.5 2495.34
   0   5  -8146323.6 2576.14
   0   5   8136515.0 2537.73
   0   5  -8144239.0 2466.85
   0  -5   8135286.6 2217.05
   0   5  -8141651.2 2775.67
   0  -5  -8139016.9 2553.55
   0  -5  -924662.16 1247.16
   0   5   922880.61 1140.11
   0  -5   925443.14 1404.88
   0   5   927514.59 1534.74
   0  -5  -924926.46 1000.61
   0  -5   927779.89 1189.12
   0   5   927157.91 1375.63
   0   5  -925033.45 1117.56
   0  -5   923402.50 1016.18
   0   5  -924767.57 1343.81
   0  -5  -926180.00 1420.61
   0  -5 -1012841.78  679.80
   0   5  1012214.20  784.94
   0  -5  1012736.74 1296.10
   0   5  1013778.96  837.50
   0  -5  1012976.69  596.03
   0  -5 -1011441.22  438.50
   0   5 -1011605.18  663.76
   0   5 -1012475.43  649.21
   0   5 -1010996.51 2524.30
   0  -5 -1011828.23  756.01
   0  -5 -11 4030.27  417.04
   0   5  11 3299.16  318.54
   0  -5  11 4651.69 1696.98
   0   5  11 3309.93  644.93
   0  -5  11 4157.42  384.11
   0  -5 -11 3615.64  253.86
   0   5 -11 3319.46  541.63
   0   5  11 5052.08 1127.44
   0   5 -11 4117.67  706.80
   0   5 -11 3817.35 1109.14
   0  -5 -11 4027.24 1507.81
   0  -5 -12 4405.69  443.13
   0   5  12 4658.36  436.52
   0  -5  12 4760.15 1409.76
   0   5  12 4272.92  820.76
   0  -5  12 4574.85  672.33
   0  -5 -12 3892.33  251.42
   0   5 -12 3869.10  470.69
   0   5  12 4483.16  979.30
   0   5 -12 5353.00 1199.11
   0   5 -12 5718.46 1105.42
   0  -5 -12 5699.31 1276.63
   0  -5 -13  -11.30   74.44
   0   5  13  381.50  149.33
   0  -5  13 -282.49  447.20
   0  -5  13  340.72  207.44
   0   5 -13   41.69   70.47
   0   5  13  325.92  399.26
   0   5 -13  275.28  242.25
   0   5 -13  -97.75  618.27
   0  -5 -13  919.44  520.83
   0  -5 -14 1344.83  289.81
   0   5  14 1449.16  260.75
   0  -5  14 1143.97  678.75
   0   5  14 2058.04  596.25
   0  -5  14 1956.15  464.51
   0   5 -14 1411.27  300.16
   0   5  14 1285.27  628.36
   0   5 -14 1368.14  481.70
   0   5 -14 2087.79  725.37
   0  -5 -14 2078.17  593.67
   0  -5 -15  816.93  207.37
   0  -5  15  323.79  437.92
   0   5  15  640.19  328.55
   0  -5  15  404.18  372.88
   0   5  15  884.38  683.81
   0   5 -15  864.36  373.75
   0   5 -15 1084.93  250.00
   0   5 -15 1120.04  724.66
   0  -5 -15 1839.82  561.81
   0  -5 -16  793.31  150.12
   0  -5  16 1566.13  308.59
   0   5  16  618.43  132.96
   0   5  16  667.64  225.76
   0  -5  16 1520.77  400.76
   0   5  16  -79.09  513.12
   0   5 -16  770.30  399.33
   0   5 -16 1855.93  996.86
   0  -5 -16 1766.21  456.43
   0  -5 -17   46.77   37.05
   0  -5  17  800.39  409.73
   0   5  17  358.82  216.58
   0  -5  17  -94.97  355.09
   0   5  17  561.14  235.52
   0   5 -17  126.83  397.82
   0   5 -17  698.00  747.68
   0  -5 -17   50.13  368.85
   0  -5  18  325.39  159.91
   0  -5  18  189.89  352.20
   0   5  18  543.49  454.34
   0   5 -18  375.46  317.62
   0   5 -18  470.64  374.92
   0  -5 -18  349.86  576.04
   0  -5  19 1027.21  460.19
   0   5  19  587.20  327.36
   0  -5  19  829.37  614.79
   0   5  19 1692.14  655.43
   0   5 -19 1183.22  557.33
   0   5 -19   89.09  401.94
   0  -5 -19 1738.23  504.82
   0  -5  20  538.08  271.92
   0   5  20  -74.17  389.29
   0  -5  20 1033.67  371.56
   0   5  20  632.92  408.10
   0   5 -20  211.78  486.30
   0   5 -20  623.58  735.65
   0  -5 -20  -58.42  549.92
   0  -5  2124518.39 2540.66
   0   5  2121172.80 1660.43
   0  -5  2121414.93  778.07
   0   5  2124126.51 1057.09
   0   5 -2123081.09 1091.14
   0   5 -2124695.76 2467.12
   0  -5 -2124541.33 2212.11
   0  -5  22  713.58  281.89
   0   5  22  -25.45  539.21
   0  -5  22 1006.07  303.00
   0   5  22  650.01  623.46
   0   5 -22  305.01  197.83
   0   5 -22  472.30  668.63
   0  -5 -22 1006.49  319.80
   0   5  23  117.37  318.88
   0  -5  23  441.96  162.56
   0   5  23  802.56  400.53
   0   5 -23  440.04  214.37
   0   5 -23  789.71  625.67
   0  -5 -23  382.77  366.43
   0  -5  24  929.25  417.97
   0   5  24  656.52  527.35
   0  -5  24  111.19  285.52
   0   5  24 -184.85  559.41
   0   5 -24  496.40  483.79
   0   5 -24 -453.68  690.91
   0  -5 -24  601.62  371.49
   0  -5  25 4476.51 1881.17
   0   5  25 3879.41 1192.43
   0  -5  25 3373.30 1062.32
   0   5  25 4777.43  976.79
   0   5 -25 4621.33  986.49
   0   5 -25 2897.14 1431.37
   0  -5 -25 3883.23  997.53
   0  -5  2612530.23 1590.81
   0   5  2615245.56 2880.73
   0  -5  2615192.17 1649.97
   0   5  2613803.90 1650.69
   0   5 -2613392.86 1694.80
   0   5 -2614696.59 2333.11
   0  -5 -2616821.75 1623.04
   0  -5  27 1303.06  633.64
   0   5  27  192.02  424.04
   0  -5  27  394.04  334.07
   0   5  27 1228.40  946.57
   0   5 -27  390.98  219.25
   0   5 -27  841.76  729.53
   0  -5 -27 1192.58  396.42
   0  -5  28  903.41  874.51
   0   5  28 1104.05  768.95
   0  -5  28  884.79  351.71
   0   5  28 2227.86  635.97
   0   5 -28  971.50  515.69
   0   5 -28  893.28  682.63
   0  -5 -28  829.22  364.18
   0  -5  29  816.12  466.95
   0   5  29 1108.80  322.05
   0  -5  29  760.75  567.52
   0   5  29  990.07  656.02
   0   5 -29 1300.59  786.13
   0   5 -29  715.38 1463.11
   0  -5 -29 1608.92  545.63
   0   5  30 -123.82  568.10
   0  -5  30  598.99  481.28
   0   5  30  714.78  290.07
   0   5 -30  416.56  441.24
   0   5 -30  793.54  728.44
   0  -5 -30 -128.97  580.79
   0   5  31  871.72  525.28
   0  -5  31  486.90  743.07
   0   5  31  851.31  683.44
   0   5 -31  670.51  783.31
   0  -5 -31  679.01  418.33
   0   5  32 1291.08  650.59
   0  -5  32  461.12  671.25
   0   5  32  965.58  833.42
   0   5 -32  224.22  970.50
   0  -5 -32 1185.52  407.76
   0   5  33  916.79  624.80
   0  -5  33 1436.54  885.92
   0   5  33  734.14  659.22
   0   5 -33 1776.62 1154.43
   0  -5 -33 1572.56 1047.24
   0   5  34 8955.03 3616.79
   0  -5  3415080.65 1974.07
   0  -5 -3419883.68 2065.40
   0   5 -34 8729.31 4119.67
   0  -5 -3416323.46 3664.40
   0   5  35 1174.88  574.97
   0  -5 -35 1377.27  667.93
   0  -5 -35 1130.32  539.66
   0   5  36 2534.80 2074.91
   0  -6   060095.42 1982.31
   0  -6   062034.54 1046.77
   0   6   057975.28 1115.26
   0  -6   060330.54 1413.93
   0  -6   058207.14 1339.63
   0  -6  -1  635.14  514.90
   0  -6   1  607.47  612.47
   0   6   1  -47.75  140.10
   0   6  -1  611.06  352.81
   0  -6  -1  107.64  141.76
   0  -6   1  322.08  188.39
   0  -6  -1  106.85   71.61
   0   6  -1  286.42  145.80
   0   6   1  172.18  255.79
   0   6  -1  369.32  273.03
   0  -6  -1  252.67  266.38
   0  -6   1  361.77  286.45
   0   6   1  387.37  571.34
   0   6  -1  489.26  929.60
   0  -6  -1  379.08  221.23
   0  -6   1  238.50  212.17
   0  -6  -2116764.0 2814.99
   0  -6   2116694.7 2233.08
   0   6  -2114339.0 2076.70
   0  -6  -2115735.5 1829.13
   0  -6   2120046.4 1911.10
   0  -6  -2115034.1 1809.79
   0   6  -2111535.7 1908.26
   0   6   2111153.4 2334.62
   0   6  -2118229.2 2228.57
   0  -6  -2108838.1 2010.01
   0  -6   2115450.4 2030.93
   0   6   2120747.8 2407.26
   0  -6  -2115175.0 2203.23
   0   6  -2117082.4 2372.78
   0  -6  -3  623.94  225.82
   0  -6   3  507.56  494.37
   0   6   3  247.39  177.19
   0  -6  -3  102.89  100.27
   0  -6   3  259.98  162.15
   0   6  -3  190.81  217.67
   0  -6  -3  226.62   79.38
   0   6   3  709.08  470.39
   0  -6  -3  574.16  367.32
   0   6  -3  195.16  190.31
   0  -6   3  347.17  430.83
   0   6   3  861.33  905.78
   0  -6  -3  297.02  236.20
   0   6  -3  -72.72  649.61
   0  -6  -495321.58 1824.73
   0  -6   493009.17 2485.79
   0   6   489031.13 1620.84
   0   6   491645.63 1572.22
   0  -6  -488632.49 1423.59
   0  -6   489663.06 1482.20
   0   6  -491624.92 1584.38
   0   6   490280.15 1814.30
   0  -6  -484845.19 2128.47
   0   6  -492961.22 1649.24
   0  -6   489801.20 1875.93
   0   6   493199.60 1992.79
   0   6  -487771.22 2076.46
   0  -6  -5 -144.63  369.26
   0  -6   5  567.66  366.24
   0   6   5 -130.85  248.96
   0   6   5   67.05  173.35
   0  -6  -5  150.14   95.04
   0  -6   5  321.67  204.80
   0   6  -5 -229.77  245.69
   0   6   5   91.20  315.89
   0  -6  -5  321.40  347.44
   0   6  -5 -139.80  286.53
   0  -6   5  -15.48  234.25
   0   6  -5  859.37  361.35
   0  -6  -6106625.8 1996.26
   0   6   6111430.7 1879.85
   0   6  -6108539.5 1952.11
   0   6   6115160.5 2290.66
   0   6  -6114918.9 2368.17
   0  -6   6105498.5 1938.45
   0   6  -6117024.2 2432.62
   0  -6  -6115357.8 2466.36
   0  -6  -7 4971.40 1261.91
   0   6   7 4586.89  409.74
   0  -6   7 4289.27  904.00
   0   6   7 4220.83  629.28
   0  -6  -7 4031.16  355.68
   0  -6   7 4049.83  227.47
   0   6  -7 4302.22 1031.89
   0   6   7 3512.71 1596.54
   0   6  -7 4610.57 1039.10
   0  -6   7 3809.14  881.21
   0   6  -7 5528.94 1288.78
   0  -6  -7 5597.44 1167.62
   0  -6  -823226.78 1182.17
   0  -6   824791.22 1283.26
   0   6   822821.17  952.42
   0   6   823218.25 1133.74
   0  -6  -821534.31  292.95
   0  -6   824672.90 1130.23
   0   6  -820534.20  838.39
   0   6   825030.53 1393.36
   0   6  -824092.55 1438.90
   0  -6   821873.10  914.61
   0   6  -824302.73 1433.89
   0  -6  -823403.33 1386.32
   0  -6  -9   34.74  203.42
   0  -6   9   -3.29  516.16
   0   6   9  -89.45  184.78
   0   6   9  160.57  263.39
   0  -6  -9   71.44   45.18
   0  -6   9 -149.82  208.08
   0   6   9  301.50  404.85
   0   6  -9 -251.68  283.87
   0  -6   9   63.91   59.90
   0   6  -9  473.67  707.41
   0  -6  -9  661.80  373.81
   0  -6 -10112084.2 2345.28
   0   6  10106250.6 2020.19
   0  -6  10101384.2 2585.58
   0   6  10107572.0 2083.96
   0  -6 -10101425.5 1841.90
   0   6  10102730.1 2925.74
   0   6 -10109791.3 2217.26
   0  -6  10106848.3 1937.37
   0   6 -10101327.7 2330.18
   0  -6 -10104293.2 2261.85
   0  -6 -11 1189.39  306.31
   0   6  11  536.42  210.91
   0  -6  11 -200.93  519.66
   0   6  11  911.08  280.59
   0  -6  11 1147.21  283.70
   0  -6 -11  818.14  180.47
   0   6 -11  869.26  196.88
   0   6  11  791.03  485.58
   0   6 -11  695.34  392.18
   0   6 -11   37.10  485.26
   0  -6 -11  484.13  445.12
   0  -6 -12 7318.62  439.74
   0  -6  12 6918.18 2007.89
   0   6  12 8065.51  550.34
   0   6  12 7436.19 1145.20
   0  -6  12 8184.88  369.91
   0  -6 -12 6833.59  196.10
   0   6 -12 7227.03  611.99
   0   6 -12 8259.21 1216.66
   0   6 -12 6284.93 1479.62
   0  -6 -12 8682.81 1371.55
   0  -6 -13  324.29  182.76
   0   6  13   76.44   77.16
   0  -6  13   48.85  308.81
   0   6  13  855.44  426.63
   0  -6  13  -58.35  262.62
   0   6 -13  331.61  144.43
   0   6 -13  268.32  245.89
   0   6 -13  891.65  586.68
   0  -6 -13  500.53  298.54
   0  -6 -14  175.00  123.99
   0   6  14   43.44   71.16
   0  -6  14  338.13  364.50
   0   6  14  189.13  249.40
   0  -6  14  141.36  215.22
   0   6 -14  217.86  112.85
   0   6  14  655.80  600.13
   0   6 -14  437.86  267.84
   0   6 -14 -460.49  631.77
   0  -6 -14 -131.56  516.44
   0  -6 -15 2428.08  368.06
   0  -6  15 3559.70  842.10
   0   6  15 1996.45  508.72
   0   6  15 2662.76  625.90
   0  -6  15 3108.23 1073.85
   0   6 -15 1832.01  501.29
   0   6  15 2825.10  619.88
   0   6 -15 2501.58  740.63
   0   6 -15 4050.53  734.42
   0  -6 -15 3171.04  612.62
   0  -6 -16  110.52   93.69
   0  -6  16  222.06  331.67
   0   6  16  276.72  121.21
   0   6  16  178.97  188.29
   0  -6  16  481.80  173.35
   0   6 -16  -15.91  175.70
   0   6  16  792.01  432.22
   0   6 -16  632.56  382.74
   0   6 -16 1554.94  854.33
   0  -6 -16  298.30  285.19
   0  -6 -17   68.85   35.84
   0  -6  17 1118.44  580.76
   0   6  17  364.32  251.72
   0  -6  17  -69.14  358.28
   0   6  17 1060.29  541.31
   0   6 -17  207.27  194.94
   0   6 -17  700.60  691.46
   0  -6 -17 -258.94  411.83
   0  -6  18 3679.57 1452.00
   0   6  18 3745.59 1189.05
   0  -6  18 4512.07 1449.81
   0   6  18 4504.53 1140.23
   0   6 -18 4835.97 1050.20
   0   6 -18 3318.91 1729.31
   0  -6 -18 4956.59 1540.64
   0  -6  19 -696.45  470.09
   0   6  19 -788.09  420.61
   0  -6  19  390.48  250.55
   0   6  19  544.13  312.93
   0   6 -19  139.69  167.73
   0   6 -19-1105.16  717.73
   0  -6 -19  886.68  587.16
   0  -6  20  512.89  314.88
   0   6  20  559.87  258.59
   0  -6  20  740.86  318.16
   0   6  20  491.88  516.86
   0   6 -20  -56.56  372.16
   0   6 -20  800.36  722.56
   0  -6 -20 1318.99  391.93
   0  -6  21 5788.99 2268.52
   0   6  21 4256.76  841.21
   0  -6  21 4990.32 1377.07
   0   6  21 4380.41 1152.48
   0   6 -21 4964.96 1055.04
   0   6 -21 5977.72 1318.76
   0  -6 -21 6006.50 1774.29
   0  -6  22 1053.11  549.19
   0   6  22  283.75  291.68
   0  -6  22  727.71  435.61
   0   6  22 -313.30  640.91
   0   6 -22   98.71  486.19
   0   6 -22 1074.37  804.90
   0  -6 -22  304.50  406.04
   0  -6  23  497.03  375.29
   0   6  23 1742.36  655.50
   0  -6  23  155.62  283.12
   0   6  23  501.92  472.33
   0   6 -23  395.59  443.42
   0   6 -23 1286.88  426.82
   0  -6 -23  656.13  373.35
   0  -6  24 4396.52 1250.17
   0   6  24 4284.88 1248.40
   0  -6  24 6236.56  808.74
   0   6  24 5384.21 1971.59
   0   6 -24 5558.92 1449.85
   0   6 -24 2889.02 1079.13
   0  -6 -24 5150.68 1524.44
   0  -6  25  255.74  357.20
   0   6  25  -72.09  527.19
   0  -6  25  995.37  486.09
   0   6  25  333.25  242.67
   0   6 -25  213.94  355.79
   0   6 -25 1174.06  597.33
   0  -6 -25  299.22  432.45
   0  -6  26  687.52  407.03
   0   6  26  438.84  391.41
   0  -6  26  -36.93  461.80
   0   6  26  596.62  295.80
   0   6 -26 -282.81  365.51
   0   6 -26  137.75  594.43
   0  -6 -26  822.18  478.26
   0  -6  27 -165.22  425.41
   0   6  27  679.79  815.19
   0  -6  27  290.21  237.95
   0   6  27  386.89  300.28
   0   6 -27  340.47  369.99
   0   6 -27 1034.33  705.24
   0  -6 -27  500.39  281.75
   0  -6  28  519.11  462.51
   0   6  28 1964.30  697.72
   0  -6  28  186.53  510.96
   0   6  28 1244.71  492.74
   0   6 -28  687.46  559.18
   0   6 -28 1935.00 1295.20
   0  -6 -28  977.93  548.71
   0  -6  29  -65.89  424.28
   0   6  29  502.00  606.39
   0  -6  29  159.75  323.24
   0   6  29  -17.94  610.03
   0   6 -29 1283.20 1311.40
   0  -6 -29 -388.54  532.20
   0   6  30  590.03  495.03
   0  -6  30  776.14  648.85
   0   6  30  214.83  396.29
   0   6 -30 1503.61 1087.53
   0  -6 -30  606.32  517.71
   0   6  31 -202.66  524.90
   0  -6  31 -654.51  603.11
   0   6  31  793.25  482.62
   0   6 -31  771.43 1052.46
   0  -6 -31  310.92  517.04
   0   6  32  830.71  779.77
   0  -6  32  779.81  778.29
   0   6  32 1169.76  781.27
   0   6 -32  154.84  763.63
   0  -6 -32  956.61 1202.01
   0   6  33 1057.24  797.41
   0  -6  33  988.78  742.84
   0   6  33  945.82  545.44
   0   6 -33 -126.24  942.91
   0  -6 -33  920.11  461.17
   0   6  34 1522.86  591.09
   0  -6  34  432.87  709.93
   0   6  34  215.16  637.97
   0   6 -34  631.92  522.52
   0  -6 -34 -571.92  525.10
   0   6  35  416.38  558.74
   0   6  36 1511.89  898.77
   0  -7   0  450.21  529.25
   0  -7   0   25.25  119.08
   0  -7   0   40.01   80.26
   0   7   0 -102.65  412.45
   0  -7   0  358.83  313.82
   0   7   0  151.92  509.62
   0  -7  -1 4123.27  983.10
   0  -7   1 3943.65 1095.95
   0  -7  -1 4211.24  656.88
   0  -7   1 3972.00  630.76
   0  -7  -1 4304.43  496.86
   0   7  -1 3639.11  506.30
   0   7   1 5066.84 1244.72
   0   7  -1 4220.63  996.40
   0  -7  -1 4479.44  727.97
   0  -7   1 4362.76  726.05
   0   7   1 3135.41  975.68
   0   7  -1 4710.88 1346.03
   0  -7  -211309.97  775.21
   0  -7   211343.56 1089.04
   0  -7  -211366.57  637.85
   0  -7   210223.10  276.90
   0  -7  -211147.95  532.67
   0   7  -211098.95  705.44
   0   7   2 9963.27  573.22
   0   7  -210312.64 1190.77
   0  -7  -2 9187.59  577.64
   0  -7   211326.77  606.59
   0   7   211210.14 1620.69
   0   7  -213273.41 1642.19
   0  -7  -3 4719.05 1048.49
   0  -7   3 4450.80 1160.07
   0   7   3 3013.64  589.11
   0  -7  -3 3045.87  401.82
   0  -7   3 3044.65  313.95
   0  -7  -3 3443.94  561.81
   0   7  -3 3642.76  739.41
   0   7   3 2953.85  578.81
   0   7  -3 2817.24  635.17
   0  -7   3 3301.65  743.15
   0   7   3 3765.49  959.72
   0  -7  -438643.87 1663.27
   0  -7   439368.20 1914.11
   0   7   438541.62 1737.77
   0  -7  -437592.59 1432.14
   0  -7   441385.09 1585.46
   0   7  -439461.40 1722.47
   0  -7  -440701.06 1588.43
   0   7   441211.38 1786.24
   0   7  -441195.75 1982.65
   0  -7   439065.76 1595.11
   0   7   439411.35 2123.01
   0  -7  -528944.11 1484.64
   0  -7   529900.87 1521.33
   0   7   530555.35 1304.01
   0   7   525872.08 1084.98
   0  -7  -525837.11  995.97
   0  -7   529895.11 1429.79
   0   7  -527327.84 1143.06
   0   7   525987.56 1483.64
   0   7  -528174.53 1361.91
   0  -7   527889.56 1283.00
   0   7   527125.49 1692.37
   0  -7  -614730.02  721.84
   0   7   612495.91  467.45
   0   7   614038.52  585.65
   0  -7  -614853.48  461.78
   0  -7   613733.22  357.29
   0   7  -613432.31  901.53
   0   7   616038.00 1078.86
   0   7  -614078.44  633.34
   0  -7   612323.60  812.90
   0  -7  -613369.03  985.40
   0  -7  -7 1347.24  390.25
   0  -7   7 1133.34  654.40
   0   7   7  739.48  197.05
   0   7   7  840.84  381.56
   0  -7  -7  800.51  150.27
   0  -7   7  874.99  200.30
   0   7  -7 1593.40  356.89
   0   7   7 -210.63  592.26
   0   7  -7 1076.31  584.23
   0  -7   7 1028.52  181.91
   0   7  -7  548.67  608.60
   0  -7  -7  964.52  656.03
   0  -7  -8 4307.36 1153.30
   0   7   8 3412.82  723.90
   0   7   8 3652.20  994.15
   0  -7  -8 3354.42  223.03
   0  -7   8 4082.30  390.10
   0   7   8 4236.90  936.77
   0   7  -8 4583.98 1090.51
   0  -7   8 2799.07  542.52
   0   7  -8 3636.61  550.96
   0  -7  -8 3615.10 1304.80
   0  -7  -918577.37  996.35
   0  -7   918748.08 1253.97
   0   7   918607.65  822.60
   0   7   919934.17 1037.74
   0  -7  -917942.58  707.51
   0  -7   919095.83  937.51
   0   7   920559.59 1256.65
   0   7  -919651.26 1011.30
   0  -7   917655.32  928.48
   0   7  -917966.81 1251.04
   0  -7  -921217.50 1273.59
   0  -7 -10 4073.07 1125.95
   0  -7  10 2896.00 1180.91
   0   7  10 2704.93  524.98
   0   7  10 3005.10  763.06
   0  -7  10 4703.22  769.27
   0  -7 -10 2724.22  321.00
   0   7  10 2613.47  943.38
   0   7 -10 4211.63  945.60
   0  -7  10 2548.72  505.72
   0   7 -10 6250.91 1539.35
   0  -7 -10 3719.07 1393.06
   0  -7 -1131179.03 2063.22
   0  -7  1133579.36 1662.06
   0   7  1130922.44 1083.13
   0   7  1130198.18 1177.42
   0  -7  1131372.04 1325.84
   0  -7 -1128101.73  910.19
   0   7  1130462.54 1441.42
   0   7 -1132055.21 1210.57
   0  -7  1132128.48 1064.07
   0   7 -1131220.29 1716.80
   0  -7 -1210333.79 1116.88
   0  -7  12 9065.97  877.95
   0   7  12 9818.01 1035.40
   0  -7  1211115.85  616.06
   0  -7 -12 9737.22  247.38
   0   7 -12 9529.65  398.97
   0   7  12 9860.59  945.93
   0   7 -12 9936.07  542.27
   0   7 -1210809.61  937.10
   0  -7 -1211654.02 1939.78
   0  -7 -13 3055.27  716.19
   0  -7  13 3545.22 1144.98
   0   7  13 2253.50  543.27
   0   7  13 2501.44  609.23
   0  -7  13 3262.01  391.69
   0   7 -13 2178.23  653.25
   0   7  13 3728.35 1171.46
   0   7 -13 3097.81  814.00
   0   7 -13 3148.24  749.69
   0  -7 -13 2329.29  714.17
   0  -7 -14 1088.98  319.66
   0  -7  14 1082.08  617.34
   0   7  14  480.75  188.04
   0   7  14  862.67  425.22
   0  -7  14 1235.53  405.73
   0   7 -14  598.20  192.21
   0   7  14  999.97  756.04
   0   7 -14 1349.90  458.13
   0   7 -14  665.36  712.13
   0  -7 -14  474.17  392.00
   0  -7 -15  801.39  324.24
   0  -7  15 1830.95  811.47
   0   7  15  660.50  252.46
   0   7  15  320.52  367.63
   0  -7  15  832.49  324.44
   0   7 -15  535.11  236.95
   0   7 -15  379.91  414.46
   0   7 -15  535.70  465.55
   0  -7 -15 1273.98  467.98
   0  -7 -16 2852.20  498.67
   0  -7  16 5230.11 1073.56
   0   7  16 2310.54  624.20
   0   7  16 2505.21  845.74
   0  -7  16 3265.96  719.02
   0   7 -16 1988.83  583.34
   0   7 -16 3357.64  741.55
   0   7 -16 2434.34 1007.14
   0  -7 -16 3479.05  912.98
   0  -7 -17 6128.36  267.82
   0  -7  17 7486.68 1729.57
   0   7  17 7673.53 2150.12
   0  -7  17 6984.67 1304.60
   0   7  17 5788.60 1723.93
   0   7 -17 7070.27 1394.01
   0   7 -17 6635.98 1329.67
   0  -7 -17 7680.86 2509.80
   0  -7 -18 5882.68  152.85
   0  -7  18 6186.62 1613.54
   0   7  18 7435.92 2045.33
   0  -7  18 6718.99  605.68
   0   7  18 5543.89 1904.70
   0   7 -18 5628.81 1227.48
   0   7 -18 7108.70 1896.00
   0  -7 -18 6262.32 2130.40
   0  -7  19  931.73  593.37
   0   7  19  590.11  571.08
   0  -7  19  183.96  227.87
   0   7  19  -97.42  388.21
   0   7 -19    0.48  328.23
   0   7 -19 -264.05  717.33
   0  -7 -19 1765.88  569.46
   0  -7  20 5431.59 1112.26
   0   7  20 7071.83 1616.43
   0  -7  20 7503.99 1373.61
   0   7  20 6681.59 1646.89
   0   7 -20 5588.62 2041.63
   0   7 -20 5313.13  895.99
   0  -7 -20 5508.36 1773.71
   0  -7  2113462.61 1423.89
   0   7  2112323.58  968.95
   0  -7  2113491.66 1645.85
   0   7  2116199.98 1642.96
   0   7 -2115155.01 1289.87
   0   7 -2113167.26 3168.38
   0  -7 -2115237.22 1827.99
   0  -7  22 5042.04 1498.24
   0   7  22 6001.42 1567.10
   0  -7  22 6426.64 1574.33
   0   7  22 5446.54 1568.30
   0   7 -22 5038.73 1430.29
   0   7 -22 4554.44 1402.58
   0  -7 -22 4919.58 1714.81
   0  -7  23 9085.37 1843.72
   0   7  23 9031.51  914.90
   0  -7  23 9437.82 1034.11
   0   7  2310067.92 1689.48
   0   7 -23 9642.56 1185.29
   0   7 -23 9657.60 2840.19
   0  -7 -23 9863.07 2382.34
   0  -7  24 3122.44 1298.44
   0   7  24 3005.27 1283.44
   0  -7  24 3391.32 1246.70
   0   7  24 3129.76  935.52
   0   7 -24 3699.52 1061.15
   0   7 -24 2608.12  824.68
   0  -7 -24 3906.33  876.50
   0  -7  25 1116.44  667.28
   0   7  25  797.31  511.47
   0  -7  25 1208.08  470.65
   0   7  25  947.83  388.39
   0   7 -25 1614.16  560.79
   0   7 -25  937.67 1330.00
   0  -7 -25  506.18  579.00
   0  -7  26 7757.26 2589.83
   0   7  26 6964.09 2692.29
   0  -7  26 6513.37 1933.18
   0   7  26 9446.56 2345.33
   0   7 -26 6994.55 1260.39
   0   7 -26 8710.26 2726.83
   0  -7 -26 7138.80 2342.45
   0  -7  27  845.64  518.83
   0   7  27  413.98  581.46
   0  -7  27 1363.38  437.12
   0   7  27  906.55  927.97
   0   7 -27 1380.84  879.87
   0  -7 -27  727.76  374.75
   0  -7  28   78.84  433.67
   0   7  28  498.54  375.39
   0  -7  28  405.77  520.84
   0   7  28  834.79  414.24
   0   7 -28 -625.33  823.79
   0  -7 -28  350.34  331.45
   0  -7  29  152.88  298.55
   0   7  29  662.37  706.64
   0  -7  29  205.34  602.26
   0   7  29 -298.64  632.78
   0   7 -29  156.19  447.99
   0  -7 -29  352.48  253.31
   0  -7  30  478.28  569.41
   0   7  30 -991.77  524.90
   0  -7  30  581.73  723.83
   0   7  30  534.44  355.10
   0   7 -30 1568.32  854.19
   0  -7 -30  609.63  440.85
   0   7  31  270.72  516.87
   0  -7  31  408.04  449.14
   0   7  31 1331.55  589.00
   0   7 -31  645.53  933.51
   0  -7 -31  -52.00  637.20
   0   7  32  296.49  325.02
   0  -7  32 -495.98  631.88
   0   7  32 -295.50  619.28
   0   7 -32 1229.06 1851.16
   0  -7 -32  781.62  673.16
   0   7  33  388.50  236.86
   0  -7  33  625.07  393.28
   0   7  33  465.45  377.81
   0   7 -33  942.90  739.97
   0  -7 -33 1159.93  756.51
   0   7  34 1856.66 1849.92
   0   7  35 1707.60 1141.47
   0  -8   0 -126.29  548.80
   0  -8   0  123.66  106.31
   0  -8   0  246.91   97.23
   0   8   0  -32.09  386.27
   0  -8   0  252.33  317.61
   0   8   0  167.72  405.16
   0  -8  -128434.52 1408.00
   0  -8   123501.05 1347.75
   0  -8  -125910.72 1148.28
   0  -8   123890.49  933.47
   0  -8  -127691.64 1053.67
   0   8  -124068.99  999.77
   0   8   126489.47 1241.24
   0   8  -126678.32 1272.92
   0  -8  -126124.61 1162.71
   0   8   127126.43 2763.84
   0   8  -125458.95 2594.08
   0  -8  -226098.45 1295.44
   0  -8   223159.77 1343.45
   0  -8  -223562.93  989.33
   0  -8   225601.46 1068.40
   0  -8  -222913.34  920.54
   0   8  -222935.80 1149.51
   0   8   225090.44 2227.30
   0   8  -223832.69 1244.69
   0  -8  -223027.96 1071.91
   0  -8   221724.17 1323.05
   0   8   222654.60 2715.88
   0   8  -223710.94 3683.94
   0  -8  -3104216.8 2723.52
   0  -8   3102432.9 3587.98
   0  -8  -3101657.7 1845.12
   0  -8   3102911.7 1890.43
   0  -8  -3103951.9 1868.20
   0   8  -399357.04 2016.82
   0   8   3101915.5 2195.10
   0   8  -3104183.0 2319.79
   0  -8   3104338.5 2156.93
   0  -8  -418382.54 1906.92
   0  -8   418081.31 1248.71
   0  -8  -420497.92  838.87
   0  -8   421162.44  892.72
   0  -8  -420243.78  940.94
   0   8  -418872.15  885.82
   0   8   420604.68 1560.57
   0   8  -421435.80 1024.10
   0  -8   419565.96  981.18
   0   8   422275.16 2799.10
   0  -8  -519303.47 1003.59
   0  -8   521485.28 1314.60
   0  -8  -518693.52  769.47
   0  -8   519784.85  801.10
   0   8  -519160.35  863.51
   0  -8  -520304.05  941.10
   0   8   517739.78 1037.33
   0   8  -520019.24 1389.94
   0  -8   519528.84  973.62
   0   8   520086.70 2856.75
   0  -8  -6   22.72  363.10
   0  -8   6 -221.89  421.75
   0  -8  -6  -17.67   48.55
   0  -8   6  161.07   93.66
   0   8  -6  -69.93  198.11
   0   8   6  -53.21  567.02
   0   8  -6  183.68  162.48
   0  -8  -6  739.60  961.13
   0  -8  -7  264.45  184.97
   0  -8   7  401.44  315.25
   0   8   7  446.49  161.23
   0   8   7  223.12  158.89
   0  -8  -7  435.70   78.74
   0  -8   7  789.15  155.90
   0   8  -7  244.55  168.71
   0   8   7  594.05  547.35
   0   8  -7  423.75  262.68
   0  -8   7  201.41  116.40
   0  -8  -7  749.52  398.21
   0  -8  -8  288.28  386.29
   0  -8   8  185.51  394.26
   0   8   8  258.33  195.41
   0   8   8   15.25  122.16
   0  -8  -8  373.39  126.51
   0  -8   8  489.19  125.88
   0   8   8  -13.63  671.67
   0   8  -8  205.23  300.22
   0  -8   8  183.45  156.54
   0  -8  -8  505.46  424.44
   0  -8  -9 4631.31 1041.50
   0   8   9 2244.50  803.68
   0   8   9 3689.68  735.30
   0  -8   9 3128.34  234.10
   0  -8  -9 2925.46  135.74
   0   8   9 3097.89 1009.13
   0   8  -9 2915.00  750.42
   0  -8   9 2552.48  520.08
   0   8  -9 4596.62 1561.85
   0  -8  -9 2435.88 1652.55
   0  -8 -10  431.92  401.80
   0  -8  10  694.28  382.08
   0   8  10  241.91  141.32
   0   8  10  455.00  181.87
   0  -8  10  166.82  159.92
   0  -8 -10  101.79   55.23
   0   8  10 -204.42  494.03
   0   8 -10   45.48  203.09
   0  -8  10  229.64  130.63
   0   8 -10  924.93  568.43
   0  -8 -10  282.13  637.50
   0  -8 -11  834.94  426.55
   0  -8  11  -62.59  628.74
   0   8  11 1170.21  360.40
   0   8  11 1151.37  387.52
   0  -8 -11  906.71  220.47
   0   8  11  983.61  461.82
   0   8 -11 2109.85  585.73
   0  -8  11  537.86  398.78
   0   8 -11 1126.59  979.46
   0  -8 -11 1038.91  675.59
   0  -8 -12  291.76  267.23
   0  -8  12  386.90  358.54
   0   8  12  878.23  174.03
   0   8  12 1156.24  446.09
   0  -8  12  503.90  176.83
   0  -8 -12  403.90  114.76
   0   8  12  951.97  722.64
   0   8 -12  804.61  359.33
   0  -8  12  573.11  261.07
   0   8 -12  880.28  441.73
   0  -8 -12  938.97  649.94
   0  -8 -1311460.06  921.31
   0  -8  1311843.95 2599.32
   0   8  13 9394.86  822.34
   0   8  13 9726.03  596.83
   0  -8  1310042.86  425.32
   0  -8 -13 8629.59  258.09
   0   8 -13 9292.91  461.48
   0   8  13 8471.42 3391.64
   0   8 -1310125.70  691.85
   0   8 -1311539.68 3008.16
   0  -8 -1311248.82 1942.64
   0  -8 -14 1920.86  538.61
   0  -8  14 1288.91  901.16
   0   8  14 1889.95  528.20
   0   8  14 1934.85  489.02
   0  -8  14 2529.04  419.25
   0   8 -14 1588.84  312.89
   0   8  14 1084.94  551.62
   0   8 -14 3350.94  705.62
   0   8 -14 2341.75  489.64
   0  -8 -14 2614.15  806.79
   0  -8 -15 9928.12  835.01
   0  -8  1511134.91  887.99
   0   8  15 9852.02 1152.68
   0  -8  1510769.41  494.26
   0   8 -15 9054.66  536.04
   0   8  15 9618.18 3025.13
   0   8 -1510951.20 1252.42
   0   8 -1510460.84  971.59
   0  -8 -1510608.21 3421.73
   0  -8 -16 1582.30  471.74
   0  -8  16 1690.89  786.72
   0   8  16 2314.01  808.62
   0   8 -16 1270.21  407.59
   0   8  16 2178.15  852.61
   0   8 -16  801.28  549.06
   0   8 -16 3082.52 1135.03
   0  -8 -16 2258.46  873.27
   0  -8 -17 4165.95  542.78
   0  -8  17 4699.89 1041.96
   0   8  17 4595.17 1226.71
   0  -8  17 5168.79  838.02
   0   8  17 3792.89 1455.91
   0   8 -17 5589.03 1166.58
   0   8 -17 3490.49 1037.74
   0  -8 -17 7405.34 1056.00
   0  -8 -18 1454.12  391.64
   0  -8  18 3202.70 1024.60
   0   8  18 1449.79  663.42
   0  -8  18 2407.59  557.02
   0   8 -18 1409.26  482.50
   0   8 -18 1668.33  424.89
   0  -8 -18 2584.57  732.70
   0  -8  1926291.86 1388.76
   0   8  1922904.69  942.87
   0  -8  1927479.20 2248.56
   0   8 -1923300.65 1405.21
   0   8 -1927292.24 2191.04
   0  -8 -1931082.22 3169.64
   0  -8  20 3590.29  929.55
   0   8  20 3890.03 1199.74
   0  -8  20 4946.81 1390.61
   0   8  20 3742.74 1445.41
   0   8 -20 3743.32 1045.35
   0   8 -20 3208.83  843.12
   0  -8 -20 5200.74 1567.40
   0  -8  2127595.32 2705.69
   0   8  2126737.65 1638.93
   0  -8  2127018.67 2206.71
   0   8  2124060.58 2279.39
   0   8 -2121288.24 1349.17
   0   8 -2129932.33 5001.41
   0  -8 -2126378.89 2093.67
   0  -8  22  -64.81  590.89
   0   8  22  536.80  373.92
   0  -8  22  504.82  189.56
   0   8  22 -920.20  661.06
   0   8 -22  485.35  397.47
   0   8 -22 -291.33  881.68
   0  -8 -22  831.85  348.29
   0  -8  23  381.41  460.01
   0   8  23 1000.29  461.13
   0  -8  23  376.46  203.00
   0   8  23  640.87  376.72
   0   8 -23 1000.97  523.55
   0   8 -23 1615.82 1435.53
   0  -8 -23  675.01  481.78
   0  -8  24  682.69  341.87
   0   8  24   -9.25  456.82
   0  -8  24 -315.68  427.06
   0   8  24  611.00  319.39
   0   8 -24  224.08  284.02
   0   8 -24 -278.46  836.54
   0  -8 -24  345.49  310.40
   0  -8  25  794.93  511.04
   0   8  25  365.64  531.10
   0  -8  25 1777.02  534.60
   0   8  25 1914.27  571.07
   0   8 -25 1975.76 1558.66
   0  -8 -25 2130.13  476.45
   0  -8  26  141.16  412.56
   0   8  26  388.31  387.45
   0  -8  26  502.33  287.08
   0   8  26  -22.89  616.86
   0   8 -26  743.95  625.32
   0  -8 -26  263.63  259.00
   0  -8  27  115.64  459.63
   0   8  27  594.51  475.14
   0  -8  27  840.49  473.39
   0   8  27  575.84  663.14
   0   8 -27  269.20  805.78
   0  -8 -27    5.29  275.51
   0  -8  28 2415.67 1677.68
   0   8  28 2754.05 1414.80
   0   8  28 3548.15  786.80
   0   8 -28 2670.76 1623.59
   0  -8 -28 4641.91 1374.51
   0  -8  29 4776.17 2323.92
   0   8  29 4311.73 1944.08
   0  -8  29 4154.65 2492.10
   0   8  29 5902.71 1678.81
   0   8 -29 8481.90 2442.94
   0  -8 -29 6431.34 1839.77
   0  -8  30 1067.65  797.79
   0   8  30  221.56  467.48
   0  -8  30 1387.85  601.39
   0   8  30  446.41  966.40
   0   8 -30 1390.83  514.11
   0  -8 -30 1799.67 1222.87
   0   8  31 1516.29  805.60
   0  -8  31 1042.32  811.20
   0   8  31 3928.13 1101.06
   0   8 -31 2627.20 1624.84
   0  -8 -31 2577.22 1770.99
   0   8  32  -16.66  244.21
   0  -8  32  255.81  330.95
   0   8  32  409.05  436.27
   0   8 -32  785.23  484.98
   0  -8 -32  397.49  285.41
   0  -8  33 -202.54  534.33
   0  -8 -33 -279.68  464.43
   0  -9   0  218.26  478.36
   0  -9   0  244.80  128.63
   0  -9   0  -85.74   76.73
   0   9   0 -282.97  382.68
   0   9   0  868.56  764.00
   0  -9   123265.68 1335.35
   0  -9   121232.64 1001.84
   0  -9  -121892.06 1102.82
   0  -9   122523.85  887.98
   0  -9  -120777.50  812.54
   0   9   123090.41 1145.75
   0   9  -120645.38 1012.40
   0  -9   122109.06 1042.64
   0   9   121976.77 2971.54
   0   9  -123425.64 1635.27
   0  -9  -2 7147.04  735.60
   0  -9   2 7392.00  845.13
   0  -9  -2 5547.95  379.81
   0  -9   2 6628.32  251.94
   0  -9  -2 6396.15  205.77
   0   9  -2 7386.34  389.17
   0   9   2 6348.34 1771.26
   0   9  -2 7116.72 1250.83
   0  -9   2 6315.38 1016.83
   0   9   2 6502.02 2339.18
   0   9  -2 7379.23 2029.17
   0  -9  -3 3583.42  733.37
   0  -9   3 3997.15 1261.80
   0  -9  -3 2997.86  431.12
   0  -9   3 2921.33  345.55
   0  -9  -3 3068.16  252.97
   0   9  -3 2607.68  569.59
   0   9   3 2496.18 1235.21
   0   9  -3 3849.34  953.19
   0  -9   3 1705.81  921.90
   0   9   3 2970.87 1637.20
   0   9  -3 3091.10  961.01
   0  -9  -414745.65 1158.97
   0  -9   413663.74 1256.52
   0  -9  -412904.30  253.04
   0  -9   413429.13  680.04
   0  -9  -412921.73  248.03
   0   9  -412504.57  875.97
   0   9  -413054.66  606.62
   0  -9   412761.80  492.17
   0   9   413023.66  895.19
   0   9  -414054.04 2040.63
   0  -9  -514482.06  880.52
   0  -9   516921.20 3096.67
   0  -9  -514490.14  599.14
   0  -9   515155.69  714.31
   0  -9  -513777.81  652.70
   0   9  -514348.43  747.26
   0   9   514979.84 1014.68
   0   9  -516667.06 1053.70
   0  -9   513783.62 1299.78
   0   9   516607.29 1637.77
   0   9  -512653.04 1257.00
   0  -9   6 2066.86  932.79
   0  -9  -6 1757.61  193.46
   0  -9   6 1950.34  464.38
   0   9  -6 1185.65  451.29
   0  -9  -6 1798.84  385.82
   0   9   6 1402.50  174.16
   0   9  -6 1849.80  564.59
   0  -9   6 1120.61  283.39
   0  -9  -7 6060.19 1414.15
   0  -9   7 6794.19 2463.50
   0  -9  -7 4951.71  120.11
   0  -9   7 5535.58  481.80
   0  -9  -7 6100.94  449.45
   0   9   7 6052.93 2033.69
   0   9  -7 6103.14 1337.74
   0  -9   7 4427.81  597.79
   0  -9  -7 5865.57 1631.35
   0  -9  -8  846.85  537.25
   0  -9   8 1025.31  628.98
   0   9   8  411.87  314.33
   0  -9   8  267.41  168.71
   0  -9  -8  233.59   74.55
   0   9   8  363.17  374.34
   0   9  -8  439.86  271.47
   0  -9   8  309.47  174.08
   0  -9  -8  600.34  750.65
   0  -9  -9 4050.66 1423.89
   0  -9   9 4173.56 1060.03
   0   9   9 3659.13  382.10
   0  -9   9 3695.49  710.81
   0  -9  -9 3416.60  252.14
   0   9   9 2535.31  728.70
   0   9  -9 4172.19 1345.28
   0  -9   9 3363.96  529.34
   0  -9  -9 5004.47 1147.67
   0  -9 -10  306.35  274.24
   0   9  10  -27.67  167.66
   0  -9  10 -113.11  208.53
   0  -9 -10   28.11   67.92
   0   9  10 -729.64  788.36
   0   9 -10  -18.50  259.88
   0  -9  10   67.22  117.15
   0  -9 -10  -99.56  678.20
   0  -9 -11 6750.73 1476.35
   0  -9  11 4296.49 1241.79
   0   9  11 5924.93  981.50
   0  -9  11 4993.34  691.18
   0  -9 -11 4246.83  156.14
   0   9  11 4859.72 1680.85
   0   9 -11 4309.57 1108.67
   0  -9  11 4455.40  583.73
   0   9 -11 3500.53  887.41
   0  -9 -11 5858.97 1748.99
   0  -9 -12  426.10  352.06
   0  -9  12  270.79  457.32
   0   9  12  204.65  171.05
   0   9  12  -31.31  307.71
   0  -9  12 -227.56  241.76
   0  -9 -12  176.44   93.08
   0   9  12  563.09  661.37
   0   9 -12  132.67  221.61
   0  -9  12  161.56   91.74
   0   9 -12  661.84  633.63
   0  -9 -12  202.11  356.80
   0  -9 -13 3809.24 1041.76
   0  -9  13 4380.51 1883.77
   0   9  13 3057.39  982.20
   0  -9  13 3684.09  724.38
   0  -9 -13 3044.28  318.61
   0   9 -13 3399.97  611.04
   0   9  13 5205.36 1389.13
   0   9 -13 3235.75 1078.85
   0   9 -13 4557.69 1316.53
   0  -9 -13 4634.88  872.90
   0  -9 -14   69.53  119.35
   0  -9 -14 -149.09  273.35
   0  -9  14  574.31  480.64
   0   9  14  197.79  247.31
   0  -9  14  161.53  205.46
   0  -9 -14   27.88   67.63
   0   9 -14  338.59  116.36
   0   9  14  528.52  451.37
   0   9 -14  387.63  369.73
   0   9 -14  292.96  777.39
   0  -9 -14   95.33  513.00
   0  -9 -15 5463.99  647.96
   0  -9  15 4436.15 1964.47
   0   9  15 5002.66 1355.36
   0  -9  15 5108.80  413.47
   0   9 -15 4212.41  690.51
   0   9  15 6574.36 2003.70
   0   9 -15 6892.85  648.62
   0   9 -15 5718.21 1517.21
   0  -9 -15 5650.68 1742.90
   0  -9 -16 3322.53  869.02
   0  -9  16 4749.62 1236.21
   0   9  16 3432.26  700.62
   0  -9  16 3821.91  692.92
   0   9  16 2791.83  725.63
   0   9 -16 3251.11  912.85
   0   9 -16 5995.18 1413.34
   0  -9 -16 3644.41  958.30
   0  -9 -17  189.83  195.34
   0  -9  17  540.54  562.61
   0   9  17  440.83  358.91
   0  -9  17  -16.78  292.81
   0   9  17  924.99  574.33
   0   9 -17  561.71  384.54
   0   9 -17 -400.09  703.71
   0  -9 -17  521.39  438.01
   0  -9  18  127.02  251.58
   0   9  18 -309.78  380.41
   0  -9  18 -376.08  350.65
   0   9  18 -166.89  758.80
   0   9 -18  370.65  193.53
   0   9 -18  373.83  655.07
   0  -9 -18  110.41  622.97
   0  -9  19 6963.58 2650.09
   0   9  19 7476.79 1207.52
   0  -9  19 7618.66 1712.11
   0   9  19 7937.15 1844.64
   0   9 -19 6893.23 1489.18
   0   9 -19 6134.41 1218.64
   0  -9 -19 7531.32 1522.20
   0  -9  20  627.82  416.10
   0   9  20  494.65  380.44
   0  -9  20  555.20  313.00
   0   9 -20  746.72  301.55
   0   9 -20 1268.54  421.75
   0  -9 -20 1111.81  711.23
   0  -9  21 4857.07 1330.45
   0   9  21 4530.16 1363.24
   0  -9  21 4033.81 1146.25
   0   9 -21 3808.09 1849.42
   0  -9 -21 4239.70 1461.09
   0  -9  22  433.37  761.33
   0   9  22  769.75  535.71
   0  -9  22  961.51  289.04
   0   9 -22  740.83  417.51
   0  -9 -22  504.21  391.85
   0  -9  23 4740.38 1922.13
   0   9  23 3809.61 1283.27
   0  -9  23 6055.68 1066.12
   0   9  23 6537.25 1749.48
   0   9 -23 7503.39 1862.22
   0  -9 -23 6319.95 1949.78
   0  -9  24 -109.05  694.30
   0   9  24  337.42  253.59
   0  -9  24  749.96  225.07
   0   9  24  782.00  433.16
   0   9 -24 1483.21 1098.48
   0  -9 -24  123.63  240.80
   0  -9  25 3008.58 1146.09
   0   9  25 2108.48 1238.63
   0  -9  25 3516.61  993.16
   0   9  25 2263.64  550.77
   0   9 -25 2603.19 1412.75
   0  -9 -25 3298.25  652.17
   0  -9  2612620.83 1827.65
   0   9  2610372.45 2143.99
   0  -9  2611604.97 1386.50
   0   9  2614746.54 3022.55
   0   9 -2613635.57 3999.36
   0  -9  27  384.01  585.34
   0   9  27  185.83  426.81
   0  -9  27  918.04  460.25
   0   9  27    1.53  704.42
   0   9 -27  -34.11  855.41
   0  -9 -27 1215.17  582.59
   0  -9  28 1714.60  674.84
   0   9  28 2669.89  922.71
   0  -9  28 1918.96  399.61
   0   9  28 2815.99  968.57
   0   9 -28 1809.38  948.48
   0  -9 -28 2355.55  827.55
   0  -9  29 3133.06 1757.49
   0  -9  29 4988.81 1560.62
   0   9  29 3274.04 1161.73
   0   9 -29 2987.30 2298.15
   0  -9 -29 4511.27 1333.52
   0  -9  30 1858.57 1208.42
   0  -9  30 2964.72 1451.60
   0   9  30 3293.23 1345.38
   0   9 -30 4938.08 2241.47
   0  -9 -30 2715.13 1083.02
   0  -9  31 1343.09  936.37
   0  -9  31 2235.70 1132.72
   0   9  31  594.30  505.60
   0   9 -31 2238.34 1149.19
   0  -9 -31 2425.71 1217.21
   0  -9  32  775.53  638.23
   0  -9 -32  437.72  433.89
   0 -10   033923.29 1420.81
   0 -10   030005.69 1016.31
   0 -10   029213.55  841.80
   0  10   032077.45 1575.32
   0  10   028829.51 2871.16
   0 -10  -114201.65 1736.97
   0 -10   115292.28  961.07
   0 -10   112062.78  793.24
   0 -10  -113631.46  570.21
   0 -10   113567.68  249.28
   0 -10  -113882.48  264.11
   0  10  -114436.55 1747.56
   0  10   113949.09 1863.64
   0  10  -115497.13 1197.35
   0 -10  -2  858.44  772.11
   0 -10   2 2823.62 1290.21
   0 -10  -2  967.92  243.61
   0 -10   2 1252.77  402.06
   0 -10  -2  891.02  179.47
   0  10  -2 1057.40  381.00
   0  10   2  535.05  356.63
   0  10  -2 1558.11  527.64
   0 -10   2  945.64  301.74
   0  10   2 1031.64  827.96
   0  10  -2  307.59  648.06
   0 -10  -3 2162.46  719.07
   0 -10   3 1736.28  419.50
   0 -10  -3  833.51  164.63
   0 -10   3 1554.82  260.14
   0 -10  -3  766.98  159.43
   0  10  -3 1121.76  342.09
   0  10   3  869.44  192.72
   0  10  -3 1606.19  557.81
   0 -10   3  160.29  329.22
   0  10   3  862.31 1028.74
   0  10  -3 1546.59  782.49
   0 -10  -4 8953.71  826.00
   0 -10   4 9730.47 3014.33
   0 -10  -4 7216.05  105.27
   0 -10   4 7352.53  579.45
   0 -10  -4 6822.31   84.90
   0  10  -4 7340.02  372.59
   0  10   4 8959.43  976.50
   0  10  -4 6829.07  829.98
   0 -10   4 6719.60  753.51
   0  10   410531.02 2999.96
   0  10  -4 7318.99 2311.18
   0 -10  -5 5281.30 1055.98
   0 -10   5 6349.46 1740.89
   0 -10  -5 4451.73   83.03
   0 -10   5 5225.76  307.96
   0  10  -5 4215.61  791.25
   0  10   5 3656.56 1201.78
   0  10  -5 7100.84 1621.05
   0 -10   5 4000.59  748.29
   0  10   5 6830.11 1556.65
   0  10  -5 4385.51 1403.72
   0 -10  -6  543.66  551.05
   0 -10   6 -333.60  716.55
   0 -10   6  251.56  177.60
   0 -10  -6   18.22   16.89
   0 -10  -6  -10.26   34.24
   0  10  -6  -16.89  203.80
   0  10   6 -257.23  516.78
   0  10  -6  339.24  231.84
   0 -10   6   98.88  140.08
   0  10   6  364.15  320.27
   0  10  -6  305.99  483.28
   0 -10  -7 5407.08 1446.42
   0 -10   7 5594.93 1978.52
   0 -10   7 4321.66  921.96
   0 -10  -7 3613.18  148.85
   0 -10  -7 3503.63  413.38
   0  10   7 3311.70 1068.95
   0  10  -7 3704.82 1015.35
   0 -10   7 2349.42  611.18
   0  10  -7 4034.04 1385.47
   0 -10  -7 4145.66 1471.16
   0 -10  -8  587.95  385.53
   0 -10   8  921.62  558.15
   0 -10   8  653.52  186.22
   0 -10  -8  318.98   72.32
   0 -10  -8  213.06   78.11
   0  10   8 1361.05  801.56
   0  10  -8  611.14  285.44
   0 -10   8  -34.94  154.30
   0 -10  -8  697.21  639.98
   0 -10  -9  943.15  612.54
   0 -10   9  792.13  652.99
   0 -10   9 1031.68  258.38
   0 -10  -9  597.07  114.95
   0  10   9 1087.94  621.76
   0  10  -9 1057.96  268.59
   0 -10   9  441.70  126.66
   0 -10  -9 1253.57 1003.02
   0 -10 -10  639.76  366.00
   0  10  10 1553.99  368.66
   0 -10  10 1565.93  422.49
   0 -10 -10  934.87  258.32
   0  10  10 1633.50  777.80
   0  10 -10 2258.05  476.40
   0 -10  10 1134.37  274.35
   0 -10 -10 1578.13  408.15
   0 -10 -11  541.45  471.93
   0  10  11  138.55  140.42
   0 -10  11 -103.79  259.89
   0 -10 -11  -11.92   70.93
   0  10  11  376.16  402.94
   0  10 -11  191.61  163.25
   0 -10  11  108.08   84.14
   0 -10 -11  593.27  794.10
   0 -10  1213189.96 3431.87
   0  10  1213237.95  975.24
   0 -10  1213330.31  849.38
   0 -10 -1210926.39  267.52
   0  10  1210341.61 3444.78
   0  10 -1212344.75  729.25
   0 -10  1211896.01  507.07
   0 -10 -1215887.06 1926.43
   0 -10 -13 1018.27  498.60
   0 -10  13 1120.82  774.36
   0  10  13  920.85  354.22
   0 -10  13  728.93  161.66
   0  10  13  532.01  435.96
   0  10 -13  205.29  279.82
   0  10 -13 1465.74  630.99
   0 -10 -13  474.97  395.92
   0 -10 -1412560.45 1254.33
   0 -10  1411490.01 3158.89
   0  10  1411757.53 1337.89
   0 -10  1412746.00  486.51
   0  10  1411879.87 2610.63
   0  10 -1411281.18 1576.67
   0  10 -1413757.92 3598.21
   0 -10 -1414206.06 1190.19
   0 -10 -1516033.61  908.14
   0 -10  1519056.37 1851.43
   0  10  1516331.21  852.00
   0 -10  1517681.47 1140.59
   0  10  1518089.20 4573.48
   0  10 -1516832.14  642.34
   0  10 -1517129.74 2613.50
   0 -10 -1520225.67 1496.55
   0 -10 -16 4909.17  583.44
   0 -10  16 6279.87 2344.42
   0  10  16 3823.83 1245.35
   0 -10  16 4870.93  545.61
   0  10  16 5715.82 2342.50
   0  10 -16 4292.92 1381.79
   0  10 -16 4469.07 1645.03
   0 -10 -16 8938.71 2429.46
   0 -10 -17  609.17  245.12
   0 -10  17 -136.96  728.84
   0  10  17  288.83  227.31
   0 -10  17  558.31  353.27
   0  10  17  484.78  609.52
   0  10 -17  206.37  206.68
   0  10 -17  623.00  766.78
   0 -10 -17  257.34  611.54
   0 -10  18  607.96  566.20
   0  10  18  451.65  298.35
   0 -10  18  392.51  226.84
   0  10  18 1097.95  847.09
   0  10 -18   75.15  462.74
   0 -10 -18 -160.50  575.95
   0 -10  19  514.11  507.39
   0  10  19  538.51  246.85
   0 -10  19  670.07  196.03
   0  10  19  327.65  362.88
   0  10 -19 1053.25  885.37
   0 -10 -19  -51.64  581.67
   0 -10  20  845.53  794.61
   0  10  20  657.28  375.14
   0 -10  20  256.31  243.75
   0  10  20  735.75  580.50
   0  10 -20  530.91  898.38
   0 -10 -20  466.76  433.52
   0 -10  21 1246.05  685.68
   0  10  21 1230.95  639.61
   0 -10  21  535.61  263.37
   0  10  21  156.06  328.28
   0  10 -21  676.17 1039.85
   0 -10 -21  549.85  583.55
   0 -10  22   63.65  351.36
   0  10  22  547.21  268.88
   0 -10  22  521.37  290.44
   0  10  22  -23.14  670.62
   0  10 -22  462.88  887.58
   0 -10 -22 -378.89  508.21
   0 -10  23 1830.02  595.10
   0  10  23 1236.68  743.81
   0 -10  23 2197.90  617.44
   0  10  23 3342.74  927.44
   0  10 -23 3410.45 1422.44
   0 -10 -23 2490.00 1251.57
   0 -10  24 1579.23  971.87
   0  10  24  460.17  495.94
   0 -10  24  526.77  265.30
   0  10 -24  -90.62  865.93
   0 -10 -24  319.21  665.88
   0 -10  25  667.41  560.39
   0 -10  25  977.54  226.51
   0  10  25  674.72  355.91
   0  10 -25 1026.80  436.59
   0 -10 -25  833.59  580.96
   0 -10  26  638.41  423.27
   0  10  26 1107.07  709.58
   0  10 -26  189.33  715.37
   0 -10 -26  953.14  417.01
   0 -10  27 3151.68 1837.00
   0 -10  27 3021.95  940.75
   0  10  27 4479.34 1315.26
   0  10 -27 4349.31 1193.67
   0 -10 -27 4278.55 2072.93
   0 -10  28  425.15  387.95
   0 -10  28  952.19  560.96
   0  10  28 1162.30  393.66
   0  10 -28    1.32 1294.61
   0 -10 -28  383.39  450.25
   0 -10  29 1285.03 1196.89
   0 -10  29  344.18  800.53
   0  10  29  949.16  492.72
   0  10 -29 1561.63  960.85
   0 -10 -29 2586.05 1434.04
   0 -10  30  624.40  681.37
   0 -10  30  352.37  551.94
   0  10  30 1260.13 1024.03
   0  10 -30 1610.77 1530.00
   0 -10 -30  966.40  426.87
   0 -10  31  807.81  717.91
   0 -10  31  606.06  731.17
   0 -10 -31  952.37  780.48
   0 -11   0  592.00  629.42
   0 -11   0  -19.19  100.75
   0 -11   0   16.90   41.25
   0  11   0  -54.43  569.46
   0  11   0  665.75  579.67
   0 -11  -1  460.95  559.89
   0 -11   1  539.14  690.59
   0 -11   1  102.57  126.01
   0 -11  -1  329.38  146.93
   0 -11   1   62.35   43.91
   0 -11  -1  137.85   48.90
   0  11   1  533.53  524.61
   0  11  -1  -26.10  517.06
   0  11   1 -446.85  803.02
   0  11  -1 -608.30  774.20
   0 -11  -2 1126.02  501.34
   0 -11   2 1009.42  486.71
   0 -11   2  676.96  206.98
   0 -11  -2  771.65  169.01
   0 -11  -2  826.04  165.78
   0 -11   2 1124.43  224.77
   0  11   2 1034.13  610.63
   0  11  -2 2303.55  856.92
   0  11   2  794.17  844.57
   0  11  -2  607.96  328.81
   0 -11  -3 7804.24 2068.82
   0 -11   3 6472.45 1534.70
   0 -11   3 7179.17  295.72
   0  11   3 7906.10  910.42
   0  11  -3 6927.86  959.93
   0  11   3 7369.38 1923.44
   0  11  -3 6948.35 2766.97
   0 -11  -417921.57 1414.12
   0 -11   414228.96  407.77
   0  11  -412646.01  455.68
   0  11   414423.99  886.05
   0  11  -414201.90 1374.78
   0 -11   411998.79  675.67
   0  11   417260.96 1716.50
   0  11  -412885.10  981.62
   0 -11  -5  729.63  583.01
   0 -11   5  904.19  540.15
   0 -11   5 1091.47  213.21
   0  11  -5 1113.18  362.54
   0  11   5 1641.47  821.93
   0  11  -5  135.26  429.81
   0 -11   5  709.74  358.69
   0  11   5  894.99  619.25
   0  11  -5  614.38  756.94
   0 -11  -6  431.91  388.31
   0 -11   6 -118.32  723.27
   0 -11   6  293.31   79.52
   0  11  -6  210.33  222.34
   0  11   6  578.37  444.50
   0  11  -6  446.22  233.20
   0 -11   6  278.60  213.72
   0  11   6  311.96  366.15
   0  11  -6 2172.36 1248.77
   0 -11  -7 2542.89 1476.14
   0 -11   7 2105.18  658.40
   0 -11   7 2054.81  653.21
   0  11   7 2203.16  612.35
   0  11  -7 2920.09  863.21
   0 -11   7 1542.60  509.05
   0  11  -7 2107.59  879.34
   0 -11  -7 2953.98 1108.30
   0 -11  -8 6421.52 1845.55
   0 -11   8 7799.70 2283.14
   0 -11   8 6160.21  367.44
   0  11   8 5709.88 1443.88
   0  11  -8 5108.39 1373.74
   0 -11   8 5957.00  747.08
   0  11  -8 5638.89 1993.76
   0 -11  -8 5743.06 1508.62
   0 -11  -9 3589.84  856.92
   0 -11   9 3989.94  911.74
   0 -11   9 3173.76  657.24
   0  11   9 2411.09  851.04
   0  11  -9 2444.68  512.30
   0 -11   9 1670.99  480.23
   0  11  -9 2632.96  891.93
   0 -11  -9 3797.48  876.82
   0 -11  10 7705.25 1770.60
   0 -11 -10 2378.54  156.63
   0  11  10 6536.32 1823.51
   0  11 -10 6104.93 1310.84
   0  11 -10 6421.17 1769.74
   0 -11 -10 9385.43 2982.59
   0 -11 -11 3385.95  937.37
   0  11  11 3068.45  648.02
   0 -11  11 3474.64  721.07
   0  11  11 4205.10 1216.76
   0  11 -11 3230.98  987.98
   0 -11 -11 6377.16 1345.39
   0 -11 -1216104.09 2072.20
   0 -11  1217862.80 2277.10
   0  11  1216771.25  713.34
   0 -11  1216472.12 1180.34
   0  11  1216774.44 1320.07
   0  11 -1215693.60  894.14
   0 -11 -1218188.86 1403.92
   0 -11 -13 1616.16  741.43
   0 -11  13  626.68  947.00
   0  11  13  676.32  231.58
   0 -11  13 1336.45  260.85
   0  11  13 1315.62  826.32
   0  11 -13 1398.62  334.81
   0 -11 -13  -37.94  874.43
   0 -11 -1421826.29  938.74
   0 -11  1423326.55 3885.04
   0  11  1420708.38 1295.11
   0 -11  1421966.60  585.24
   0  11  1420564.21 1694.46
   0  11 -1421266.45  642.16
   0 -11 -1426260.97 2176.91
   0 -11 -15  -31.34  311.86
   0 -11  15 1129.23  864.87
   0  11  15  127.82  217.72
   0 -11  15   14.61  288.99
   0  11  15  553.31  615.35
   0  11 -15  309.21  178.12
   0 -11 -15  544.11  543.33
   0 -11 -16  997.27  507.07
   0 -11  16  451.30  317.78
   0  11  16  651.19  245.52
   0 -11  16 1032.32  360.03
   0  11  16 1506.86  599.95
   0  11 -16 1505.51 1290.64
   0 -11 -16 1936.34  896.11
   0 -11  17 1509.85  975.28
   0  11  17 1106.60  413.38
   0 -11  17 1530.92  442.06
   0  11  17 1873.32  874.46
   0  11 -17 1640.56  828.32
   0 -11 -17 2126.48  640.33
   0 -11  18  446.08  490.71
   0 -11  18  412.14  194.28
   0  11  18  865.85  412.16
   0  11 -18  474.50  769.94
   0 -11 -18  754.24  277.40
   0 -11  19  471.13  670.37
   0 -11  19  708.79  376.90
   0  11  19  -89.73  711.75
   0  11 -19 1843.86  967.14
   0 -11 -19  769.72  587.66
   0 -11  20  200.29  804.27
   0 -11  20 -287.74  332.16
   0  11  20  352.09  287.71
   0  11 -20  276.82  655.59
   0 -11 -20  425.49  300.85
   0 -11  21  884.14  385.99
   0 -11  21 1224.92  548.65
   0  11  21  846.60  699.21
   0  11 -21   -2.52  904.59
   0 -11 -21  222.20  465.14
   0 -11  22 1192.91  596.70
   0 -11  22  232.51  341.92
   0  11  22 -211.26  822.75
   0  11 -22 1553.58 1239.46
   0 -11 -22  298.88  323.39
   0 -11  23 2191.18  782.13
   0 -11  23 2040.56  705.75
   0  11  23 2190.23 1293.45
   0  11 -23 2207.14 1507.09
   0 -11 -23 2404.62  944.86
   0 -11  24 4041.94 1539.82
   0 -11  24 3680.15 1154.67
   0  11  24 6068.16 1278.27
   0  11 -24 3842.66 2635.67
   0 -11 -24 4325.11 1495.21
   0 -11  25 1415.92  678.55
   0 -11  25 1759.62  546.06
   0  11  25 1619.81  454.25
   0  11 -25 1635.37  927.57
   0 -11 -25 3561.72 1024.09
   0 -11  26  537.37  647.45
   0 -11  26  555.35  235.12
   0  11  26  875.12  859.53
   0  11 -26 1758.61 1251.84
   0 -11 -26  505.69  606.00
   0 -11  27 -322.27  537.22
   0 -11  27  198.13  242.65
   0  11 -27  972.11 1449.30
   0 -11 -27  170.75  525.41
   0 -11  28  347.88  500.17
   0 -11  28  584.55  426.37
   0  11  28  201.07  482.58
   0  11 -28  932.67 1172.59
   0 -11 -28  977.50  467.56
   0 -11  29  762.95  782.92
   0 -11  29   76.52  287.94
   0  11  29  584.70  424.45
   0  11 -29  175.37  428.13
   0 -11 -29  562.78  474.15
   0 -11  30  449.64  593.12
   0 -11  30 1073.04  312.84
   0 -11 -30 1817.49  799.43
   0 -11  31  487.87  509.06
   0 -12   0 5120.54 2094.26
   0 -12   0 2336.94  351.74
   0 -12   0 1578.04  399.38
   0  12   0 4580.84 1596.77
   0  12   0 3144.85 1685.31
   0 -12  -1  919.85  369.78
   0 -12   1  804.98  629.87
   0 -12   1  537.41  165.16
   0 -12  -1  380.25  127.97
   0 -12  -1  273.50   83.96
   0 -12   1  473.90  144.24
   0  12   1  533.65  509.93
   0  12  -1  262.79  349.52
   0  12   1 1228.58 1286.38
   0  12  -1 2005.38 1189.63
   0 -12  -2 3384.71 1502.83
   0 -12   2 2228.24  935.32
   0 -12   2 1455.39  402.77
   0 -12   2 2735.82  256.44
   0  12   2 3710.57 1169.89
   0  12  -2 4179.16 1093.84
   0  12   2 3491.30 1074.78
   0  12  -2 4151.95 1189.50
   0 -12  -3  279.99  435.93
   0 -12   3  471.93  796.34
   0 -12   3  340.40  144.89
   0  12   3  -62.47  641.67
   0  12  -3  210.99  253.55
   0  12   3  693.25  878.83
   0  12  -3  201.16  726.10
   0 -12  -4 7819.43  959.99
   0 -12   4 9409.23 3082.01
   0 -12   4 7069.80  342.42
   0  12   4 7590.07 2759.07
   0  12  -4 7569.41 2037.18
   0  12   4 7978.67 2001.60
   0  12  -4 6244.98 3152.62
   0 -12  -5 2225.32  700.43
   0 -12   5 1639.73  570.68
   0 -12   5  589.94  232.11
   0  12   5 1877.32  468.46
   0  12  -5  618.06  672.42
   0  12   5  517.90  612.07
   0  12  -5 1398.43 1109.65
   0 -12  -623977.58 1682.10
   0 -12   625261.64 1959.04
   0 -12   623569.10  888.27
   0  12   625926.14 1387.72
   0  12  -621448.56 1213.63
   0  12   625904.89 3015.68
   0  12  -624683.47 3783.30
   0 -12  -7  558.49  496.88
   0 -12   7 1820.23  599.74
   0 -12   7  861.09  216.53
   0  12   7  419.18  395.67
   0  12  -7  667.18  339.09
   0  12  -7 1065.60  559.66
   0 -12  -7 1063.58  740.26
   0 -12  -8 6734.12 2306.28
   0 -12   8 6916.55 1802.80
   0 -12   8 5680.21  705.45
   0  12   8 4006.12 1015.51
   0  12  -8 3862.32 1180.42
   0  12  -8 5034.32 1335.30
   0 -12  -8 9059.51 2455.39
   0 -12  -9 2038.11  679.65
   0 -12   9 2506.17  839.23
   0 -12   9 2172.10  474.34
   0  12   9 1613.51  752.69
   0  12  -9 1552.37  389.84
   0  12  -9 1796.21 1126.58
   0 -12  -9 3707.26 1067.50
   0 -12 -10 2286.26  887.29
   0 -12  10 2050.99  989.34
   0 -12  10 2528.25  493.53
   0  12  10 3071.53 1088.21
   0  12 -10 2133.86  645.17
   0  12 -10 3172.15  881.24
   0 -12 -10 2350.20  813.07
   0 -12 -11 3469.99  858.91
   0 -12  11 1908.95  945.87
   0 -12  11 1059.28  320.86
   0  12  11  422.16  823.20
   0  12 -11  328.13  271.56
   0  12 -11  856.20  547.60
   0 -12 -11 2962.04  766.03
   0 -12 -12  870.94  457.42
   0 -12  12  205.21  175.71
   0  12  12  993.00  508.94
   0  12 -12  780.22  275.50
   0 -12 -12 1304.03  795.34
   0 -12 -13  698.78  438.63
   0 -12  13  112.53  135.77
   0  12  13  952.96  449.34
   0  12 -13 1189.77 1009.69
   0 -12 -13 -332.38  669.83
   0 -12 -14 9666.73 1399.65
   0 -12  1410437.90 3103.66
   0 -12  14 8834.04  704.35
   0  12  14 7059.05 2662.67
   0 -12 -14 6625.09 2391.24
   0 -12 -15 4137.61  933.84
   0 -12  15 3065.24  787.59
   0 -12  15 1969.76  841.56
   0  12  15 2381.45 1009.79
   0 -12 -15 3871.49 1063.09
   0 -12  16   85.93  468.09
   0 -12  16  424.98  319.97
   0  12  16   42.81  517.12
   0 -12 -16  -43.64  652.55
   0 -12  17  614.84  557.52
   0 -12  17  127.29  129.72
   0  12  17  490.13  469.78
   0 -12 -17 -562.38  570.35
   0 -12  18  506.16  751.11
   0 -12  18  166.82  171.33
   0  12  18  613.20  468.72
   0  12 -18 -601.51  852.44
   0 -12 -18  -82.05  608.62
   0 -12  19  233.69  693.78
   0 -12  19  657.75  238.32
   0  12  19 2383.06  875.97
   0  12 -19  110.40  487.63
   0 -12 -19  684.48  472.41
   0 -12  20 8346.93 3023.10
   0 -12  20 7131.76 1881.80
   0  12  20 7802.74 1904.93
   0  12 -20 6602.45 4400.70
   0 -12 -2010073.07 1036.85
   0 -12  21 1177.28  884.01
   0 -12  21 -155.44  393.05
   0  12  21  781.90  642.71
   0 -12 -21  517.77  367.74
   0 -12  22 1567.77  877.83
   0 -12  22  558.31  482.94
   0  12  22 1003.94  588.28
   0  12 -22 -712.70  891.71
   0 -12 -22 1682.53  775.45
   0 -12  23  164.98  618.98
   0 -12  23  177.36  470.31
   0  12  23  587.14  519.29
   0  12 -23 1649.59 1025.83
   0 -12 -23 1067.19  692.13
   0 -12  24 6476.93 3840.88
   0 -12  24 6887.23  773.48
   0  12  2410675.81 1098.17
   0  12 -24 6752.52 3904.92
   0 -12 -24 8804.31 3029.09
   0 -12  25  297.33  569.05
   0 -12  25  254.50  192.10
   0  12  25 -384.51  742.99
   0 -12 -25  733.37  664.91
   0 -12  26 4719.47 2714.66
   0 -12  26 7213.19 1181.01
   0  12  26 6373.34 1820.52
   0  12 -26 6723.72 3673.41
   0 -12 -26 8435.95 2806.18
   0 -12  27  836.23 1140.33
   0  12  27  -92.95  664.42
   0  12 -27-1187.79  913.35
   0 -12 -27 1137.57  952.02
   0 -12  28 1209.67  989.75
   0 -12  28  367.02  282.38
   0  12  28  395.72  418.29
   0 -12 -28  610.79  581.53
   0 -12  29 1555.65  844.60
   0 -12  29  960.01  342.71
   0 -12 -29  505.07  578.83
   0 -12  30  536.99  679.08
   0 -13   0 -338.06  721.41
   0  13   0  801.82  447.62
   0  13   0-1000.55 1002.00
   0 -13  -1 3328.67 1879.55
   0 -13   1 2207.95 1026.80
   0  13  -1 3736.73  752.72
   0  13   1 2702.34  675.93
   0  13   1 5032.32 1217.00
   0  13  -1 5107.48 1598.31
   0 -13  -2 1041.37  646.79
   0 -13   2 2961.47 1161.42
   0 -13   2 1709.95  395.21
   0  13   2 2284.51  700.49
   0  13  -2 2632.91  801.62
   0  13   2 1887.66 1295.58
   0  13  -2 2577.75  790.70
   0 -13  -3 3995.24  848.36
   0 -13   3 3914.13 1105.47
   0 -13   3 3372.45  456.11
   0  13   3 3172.31  862.55
   0  13  -3 3808.89 1266.12
   0  13   3 5473.48 1484.69
   0  13  -3 3736.08 1250.98
   0 -13  -4 1426.65 1044.97
   0 -13   4  746.94  816.63
   0 -13   4  692.15  242.26
   0  13   4  375.63  452.28
   0  13  -4 -208.75  338.33
   0  13   4 1527.10  548.07
   0  13  -4  754.60  840.21
   0 -13  -5 1867.27  783.66
   0 -13   5 1539.54  793.94
   0 -13   5 1649.45  476.86
   0  13   5 1311.93  618.31
   0  13  -5 1007.47  367.04
   0  13   5 2905.79 1524.17
   0  13  -5 1797.83 1127.83
   0 -13  -6 -122.43  450.62
   0 -13   6  598.12  534.76
   0 -13   6  607.70  193.36
   0  13   6 1550.33  812.73
   0  13  -6  554.04  322.30
   0  13  -6  533.99  804.68
   0 -13  -7 1736.69  681.09
   0 -13   7  430.38  674.42
   0 -13   7 1028.40  342.25
   0  13   7 2554.38  930.54
   0  13  -7 1976.77  626.18
   0  13  -7 1233.18 1244.52
   0 -13  -7 1552.77  871.60
   0 -13  -8 1106.96  544.00
   0 -13   8 1378.26  620.53
   0 -13   8  179.67  148.83
   0  13   8  893.34  713.89
   0  13  -8  532.96  344.81
   0  13  -8  930.33  843.48
   0 -13  -8  875.18  519.16
   0 -13  -9  590.65  307.54
   0 -13   9 1502.33  487.58
   0 -13   9   68.56  126.89
   0  13   9  970.22  534.73
   0  13  -9  734.52  294.76
   0  13  -9 1149.99  504.38
   0 -13  -9  -14.75  755.24
   0 -13 -10 5336.03 1772.86
   0 -13  10 7478.52 2429.92
   0 -13  10 6037.68  580.98
   0  13  1011471.21 3084.08
   0  13 -10 9833.78 2947.14
   0 -13 -10 7728.70 1878.19
   0 -13 -11 5740.19 1531.48
   0 -13  11 6536.96 3017.62
   0 -13  11 5855.91  654.44
   0  13  11 7107.12 1209.51
   0  13 -11 5196.76 2771.27
   0 -13 -11 7036.53 2293.19
   0 -13 -12  713.61  457.58
   0 -13  12 1772.66  903.69
   0 -13  12  315.07  168.85
   0  13  12  453.58  392.18
   0  13 -12  201.35  724.16
   0 -13 -12 1669.98  923.02
   0 -13 -13 4237.22 1246.33
   0 -13  13 3616.35  952.69
   0  13  13 6215.65 1332.47
   0  13 -13 2940.48 1058.23
   0 -13 -13 5549.79 1663.06
   0 -13 -14 1687.88  649.43
   0 -13  14  934.12  521.86
   0 -13  14  982.48  220.72
   0  13  14 -220.30  515.66
   0 -13 -14  774.35  410.95
   0 -13  15  490.35  479.19
   0 -13  15  739.07  249.69
   0  13  15 -360.53  724.30
   0 -13 -15  618.12  381.07
   0 -13  16 1430.50  774.60
   0 -13  16 2197.50  895.04
   0  13  16 1953.01  773.24
   0 -13 -16 2330.99 1005.57
   0 -13  17 1370.92  847.68
   0 -13  17 2210.59  598.71
   0  13  17 2062.64  687.33
   0 -13 -17 2489.80 1211.03
   0 -13  18 1073.00  405.16
   0 -13  18  510.20  255.61
   0  13  18 1279.52  641.93
   0 -13 -18 -694.08  566.32
   0 -13  19 1796.46  976.80
   0 -13  19  760.27  390.39
   0  13  19  605.72  636.29
   0 -13 -19  830.00  459.61
   0 -13  20 -519.91  761.46
   0 -13  20  493.05  355.51
   0  13  20  505.01  520.13
   0 -13 -20 -271.49  598.15
   0 -13  21 2170.82 1082.27
   0 -13  21  861.53  407.72
   0  13  21 1335.88  408.40
   0  13 -21  620.55 1052.28
   0 -13 -21 3067.57 1298.92
   0 -13  22 3202.16 1017.90
   0 -13  22 1372.06  644.42
   0  13  22 1539.00  913.80
   0  13 -22 2504.10 1390.18
   0 -13 -22 2661.86 1084.79
   0 -13  23   98.99  601.28
   0 -13  23 1407.69  771.58
   0  13  23 1014.97  597.63
   0  13 -23 1594.31 1043.82
   0 -13 -23 1103.24  599.93
   0 -13  24 4318.96 1222.21
   0  13  24 5286.09 1047.88
   0  13 -24 2531.34 1254.33
   0 -13 -24 4539.80 2154.04
   0 -13  25 2377.02 1174.28
   0 -13  25 1428.34  801.05
   0  13  25 1547.02  779.49
   0  13 -25 3783.04 2118.58
   0 -13 -25  924.63  928.16
   0 -13  26 1027.05 1380.75
   0 -13  26  601.79  365.13
   0  13  26 1157.71  763.88
   0  13 -26  824.47 1060.67
   0 -13 -26  374.24  385.67
   0 -13  27 2403.86 1575.63
   0 -13  27 3164.97 1499.44
   0 -13 -27 4455.22 1422.16
   0 -13  28  513.14  596.25
   0 -13  28  210.94  356.14
   0 -13  29 -293.59  625.24
   0 -13  29  231.83  211.31
   0 -14   0 8218.20 1784.86
   0  14   0 6879.93 1438.79
   0  14   0 5996.66 1550.27
   0 -14   111222.84 2529.20
   0 -14  -111031.33 3585.18
   0  14   110908.90 1666.50
   0  14  -111616.63 1503.22
   0  14   115947.73 4323.57
   0  14  -115279.74 3537.29
   0 -14  -2 4542.33 2031.62
   0 -14   2 4562.50 1859.78
   0  14   2 5441.99 1237.44
   0  14  -2 2755.94  436.38
   0  14   2 7619.32 1722.21
   0  14  -2 5792.77 1990.57
   0 -14  -317074.02 1445.92
   0 -14   317677.33 1700.64
   0  14   312184.09 2252.00
   0  14  -313735.20 1658.24
   0  14   312782.04 2409.43
   0  14  -317146.84 3435.37
   0 -14  -4  804.64  510.20
   0 -14   4 1005.83  350.58
   0  14   4 1752.55  581.75
   0  14  -4  641.00  419.53
   0  14   4 1230.03  768.85
   0  14  -4  108.00  633.28
   0 -14  -5 8543.72 1985.37
   0 -14   5 8552.16 2458.87
   0  14   5 6154.44 1649.98
   0  14  -5 5879.73 1796.00
   0  14   512067.49 3522.14
   0  14  -5 7687.73 2753.91
   0 -14  -6  731.82  618.11
   0 -14   6 -507.29  785.17
   0  14   6 1182.13  478.68
   0  14  -6  565.05  369.73
   0  14  -6 -342.46  841.85
   0 -14  -7  280.40  312.16
   0 -14   7 1165.27  872.08
   0  14   7 -222.18  530.25
   0  14  -7  488.30  290.79
   0  14  -7  324.99  956.56
   0 -14  -7 1666.12  699.93
   0 -14  -8  591.04  694.54
   0 -14   8  638.20  372.32
   0 -14   8  333.60  265.51
   0  14   8 1285.62  689.25
   0  14  -8  423.58  443.61
   0 -14  -8 1220.43  593.11
   0 -14  -9 2119.52 1032.79
   0 -14   9 2585.42  751.27
   0 -14   9 2300.91  783.28
   0  14   9 2584.61  616.85
   0  14  -9 3076.87  808.47
   0 -14  -9 3286.49 1258.14
   0 -14 -10 3231.94  976.63
   0 -14  10 4028.33  949.10
   0 -14  10 2609.39  808.34
   0  14  10 2218.54 1100.09
   0  14 -10 2961.85 1334.52
   0 -14 -10 3235.79  928.72
   0 -14 -11 -567.02  489.53
   0 -14  11-1377.82  877.65
   0 -14  11 -156.57  209.57
   0  14  11  822.16  459.20
   0  14 -11  743.19  736.16
   0 -14 -11  830.42  469.80
   0 -14 -12  595.49  525.66
   0 -14  12  608.27 1321.55
   0 -14  12  527.79  278.95
   0  14  12 2965.81  908.33
   0  14 -12 1658.34  988.03
   0 -14 -12 1104.33  650.46
   0 -14 -13  293.69  318.54
   0 -14  13  608.12  686.36
   0 -14  13   -6.88  201.98
   0  14  13 1458.14  527.99
   0  14 -13  957.10  387.95
   0 -14 -13 1002.65  799.26
   0 -14  14  295.94  285.33
   0  14  14  248.50  311.64
   0  14 -14 1319.37  730.38
   0 -14 -14 -465.08  674.55
   0 -14  15 7261.84 3193.13
   0 -14  15 7500.03 1086.98
   0  14  15 9321.92 2108.79
   0  14 -15 7422.39 1894.74
   0 -14 -15 7217.39  747.70
   0 -14  16  616.53  604.93
   0 -14  16   62.52  281.88
   0  14  16  735.14  619.90
   0  14 -16  915.22  780.02
   0 -14 -16  308.28  262.75
   0 -14  17 1317.14 1456.79
   0 -14  17  512.56  275.96
   0  14  17 1013.91  676.83
   0 -14 -17  127.70  317.87
   0 -14  18  -32.00  864.70
   0 -14  18  521.03  347.24
   0  14  18 1097.42  735.45
   0 -14 -18  -68.46  400.86
   0 -14  19 2337.60 1341.18
   0 -14  19 1067.50  682.82
   0  14  19 1660.83  471.87
   0 -14 -19 2355.70 1054.47
   0 -14  20 1078.21  878.09
   0 -14  20  -98.63  312.08
   0  14  20 -344.80  687.84
   0  14 -20  626.11  643.82
   0 -14 -20   92.83  752.45
   0 -14  21  938.80  400.84
   0 -14  21 1149.76  389.67
   0  14  21  372.00  464.20
   0 -14 -21 1125.31  386.63
   0 -14  22  677.81  426.38
   0 -14  22  144.80  270.42
   0  14  22  870.37  686.34
   0  14 -22 -143.34  493.94
   0 -14 -22  563.97  818.26
   0 -14  23 3132.10 1084.89
   0 -14  23 2417.21 1522.16
   0  14  23 3202.35 1190.49
   0 -14 -23 5073.56 1872.89
   0 -14  24  957.78 1033.74
   0 -14  24 1078.24  679.64
   0  14  24 2686.26  687.48
   0  14 -24  148.84  832.57
   0 -14 -24 2655.18 1030.75
   0 -14  25  446.15  667.70
   0 -14  25  226.31  317.80
   0  14  25  799.92  525.63
   0  14 -25 -144.29  919.80
   0 -14 -25    3.17  280.46
   0 -14  26   89.36  765.60
   0 -14  27  804.11  991.69
   0 -14  27  967.25  575.72
   0 -14  28  186.99  270.01
   0 -15   0   -9.26  609.49
   0  15   0 -230.45  418.63
   0 -15  -1  544.09  389.75
   0 -15   1  225.80  523.97
   0  15  -1  610.41  476.25
   0  15  -1  642.52  637.20
   0  15   1  304.76  602.79
   0 -15  -2 2112.16  975.16
   0 -15   2 2239.42  757.10
   0  15   2 1230.02  336.32
   0  15  -2 2028.40  666.53
   0  15   2 1869.12 1147.07
   0  15  -2 1581.56  532.53
   0 -15  -3  935.53  769.24
   0 -15   3 1901.16  442.46
   0  15   3 2183.76  505.36
   0  15  -3 2185.91  594.92
   0  15   3 1457.72 1441.92
   0  15  -3 4036.59  962.27
   0 -15  -4 1206.72  525.33
   0 -15   4  713.21  431.48
   0  15   4  157.21  353.09
   0  15  -4  124.78  282.03
   0  15   4  435.65  439.46
   0  15  -4  309.54  546.44
   0 -15  -510595.80 1311.79
   0 -15   5 4929.12 3333.88
   0  15   5 6562.42 1586.56
   0  15   5 8366.20 3108.74
   0  15  -5 7302.22 2548.50
   0 -15  -616237.79 1784.79
   0 -15   616059.27 1099.88
   0  15   613699.80 3029.16
   0  15  -617556.75 2846.47
   0 -15  -616092.47 2079.41
   0 -15  -719220.75 2837.96
   0 -15   718213.94 1369.50
   0  15   719845.68 1275.73
   0  15  -723118.63 4502.94
   0 -15  -720337.29 4107.11
   0 -15  -8 -400.82  561.41
   0 -15   8  857.31  844.40
   0  15   8 -144.35  643.81
   0  15  -8  -12.38  920.30
   0 -15  -8  713.98 1044.72
   0 -15  -9 4089.87  806.87
   0 -15   9 1387.31  841.81
   0  15   9 4505.03 1432.48
   0  15  -9 4942.83 2168.78
   0 -15  -9 3795.52 1419.50
   0 -15 -10 6319.04 2225.78
   0 -15  10 4553.89 1517.95
   0  15  10 4998.69 1097.17
   0  15 -1010562.55 2139.63
   0 -15 -10 6720.93 2534.73
   0 -15 -11 5226.17 2741.77
   0 -15  1110932.06 1605.53
   0  15  1110360.94 1846.61
   0  15 -11 9643.62 1711.82
   0 -15 -11 7509.08 1787.25
   0 -15 -12  735.02  548.57
   0 -15  12 1102.82  461.05
   0  15  12 2743.61  775.78
   0  15 -12 1580.57  929.46
   0 -15 -12  439.45  645.28
   0 -15  13  225.55  439.58
   0  15  13  688.74  560.29
   0  15 -13  626.51  907.15
   0 -15 -13 1524.13  560.38
   0 -15  14  216.58  723.57
   0  15  14 1908.10  674.12
   0  15 -14 1281.79  775.45
   0 -15 -14  225.52  303.33
   0  15  15  176.97  302.49
   0  15 -15  507.34  767.84
   0 -15 -15 1150.54  435.20
   0 -15  16  379.72  791.20
   0  15  16 1052.34  520.01
   0  15 -16 1008.77  846.80
   0 -15 -16  460.89  413.85
   0 -15  17 1413.24  819.19
   0  15  17 1234.89  607.82
   0  15 -17 2304.49  746.29
   0 -15 -17 1112.90  417.39
   0 -15  18  -45.33  643.17
   0  15  18  841.02  551.45
   0  15 -18 1176.20  635.23
   0 -15 -18 1262.25  737.97
   0 -15  19  375.60  927.78
   0  15  19 1440.61  896.46
   0 -15 -19 1207.15  791.98
   0 -15  20 1254.33  585.00
   0  15  20  846.92  427.27
   0 -15 -20  626.46  810.61
   0 -15  21 -134.47  981.64
   0  15  21  323.06  364.84
   0 -15 -21  536.01  402.55
   0 -15  22 -663.90  766.58
   0  15  22   52.68  460.24
   0 -15 -22  -65.43  651.68
   0 -15  23  588.28  484.39
   0  15  23 1037.28  668.01
   0 -15 -23   75.97  499.35
   0 -15  24  621.32  568.38
   0 -15 -24 1347.72  572.11
   0 -16   0  673.23  629.19
   0  16   0 1032.45  466.09
   0  16   0 3303.98 1102.69
   0 -16  -1  275.75  526.67
   0 -16   1  765.11  508.45
   0  16  -1  390.87  311.01
   0  16   1  788.52  530.99
   0  16   1  965.40  773.52
   0  16  -1  329.64  879.27
   0 -16  -2 1551.88  720.22
   0 -16   2  531.21  340.46
   0  16   2 1016.46  378.73
   0  16   2  754.04 1057.03
   0  16  -2  786.15  840.27
   0 -16  -3 6076.19 1910.72
   0 -16   3 3459.84 1600.34
   0  16   3 5575.41 1607.17
   0  16   3 7410.94 2362.98
   0  16  -3 6529.24 2352.75
   0 -16  -411477.41 1196.63
   0 -16   4 9943.32 3528.68
   0  16   410915.45 2737.49
   0  16   412277.60 3151.98
   0  16  -412285.22 2804.84
   0 -16  -5 3602.67 1453.79
   0 -16   5 4369.34 1447.36
   0  16   5 4063.08 1194.68
   0  16  -5 6712.10 1471.54
   0 -16  -6  555.59  321.26
   0 -16   6   -0.00  790.05
   0  16   6  491.14  354.56
   0  16  -6 -701.55  935.48
   0 -16  -6  614.85  644.02
   0 -16  -7 3468.05 1051.94
   0 -16   7 2990.33  945.40
   0  16   7 4838.78 1095.67
   0  16  -7 3340.96 2084.29
   0 -16  -7 4081.43 1253.87
   0 -16  -814641.68 1024.73
   0 -16   814259.65 4383.39
   0  16   811930.72 2723.09
   0  16  -813407.23 3974.59
   0 -16  -817049.89 2199.01
   0 -16  -9  765.23  609.80
   0 -16   9  692.07  729.09
   0  16   9 1544.36  889.45
   0  16  -9 2443.58 1641.45
   0 -16  -9 -100.18  653.62
   0 -16 -10  618.67  740.19
   0 -16  10 1773.56 1560.45
   0  16  10  861.73  475.50
   0  16 -10 2262.46  776.96
   0 -16 -10 1002.98  653.93
   0 -16 -11  792.85  563.34
   0 -16  11 1386.91  554.18
   0  16  11  283.24  515.75
   0  16 -11 1714.75 1361.90
   0 -16 -11 -553.04  761.78
   0 -16  12 2894.96 1430.35
   0  16  12 1987.06  868.33
   0  16 -12 4523.78 2061.08
   0 -16 -12 1842.83  784.04
   0 -16  13 1042.20  744.98
   0  16  13  812.51  338.99
   0  16 -13 1637.07 1166.52
   0 -16 -13  261.47  505.22
   0 -16  14 1031.40  611.67
   0  16  14 1095.10  409.42
   0  16 -14 1154.38  986.51
   0 -16 -14  972.67  783.82
   0 -16  15  736.44  665.29
   0  16  15 1353.10  459.36
   0  16 -15  730.44  839.07
   0 -16 -15 1318.25  838.43
   0 -16  16  946.29  792.65
   0  16  16  679.07  728.59
   0  16 -16  863.47  678.87
   0 -16 -16  939.83  601.69
   0 -16  17 1800.31  729.75
   0  16  17  624.55  395.75
   0  16 -17 1189.52 1104.12
   0 -16 -17 1307.32  463.06
   0 -16  18  364.04  939.94
   0  16  18 1672.21  666.79
   0  16 -18 1593.19 1207.21
   0 -16 -18 1481.29 1003.69
   0 -16  19 1280.66  972.86
   0  16  19 2575.98 1239.09
   0  16 -19 1866.89 1327.69
   0 -16 -19 1137.23  648.95
   0 -16  20 1705.61  857.14
   0  16  20 1622.52  683.50
   0  16 -20  555.12  580.06
   0 -16 -20 1270.72 1300.73
   0 -16  21  918.62  550.59
   0  16  21 1505.63  641.69
   0 -16 -21  589.98  499.13
   0 -16 -22  854.29  682.38
   0 -17   0  282.09  518.87
   0  17   0 1147.46  904.59
   0 -17   1 1780.29  790.72
   0  17   1 1038.55  524.50
   0  17  -1  865.36  647.82
   0 -17  -2 2991.75 1167.04
   0 -17   2 2959.62 1034.80
   0  17   2 5243.48 1848.09
   0  17  -2 5197.23 1658.03
   0 -17  -3 2061.12 1125.45
   0 -17   3 1250.46  767.90
   0  17   3  173.63  446.52
   0  17   3  622.69  982.75
   0  17  -3  645.41  708.46
   0 -17  -4 1798.82 1087.79
   0 -17   4  800.79  767.42
   0  17   4  778.69  349.64
   0  17   4 1295.96 1556.34
   0  17  -4 1635.56  543.54
   0 -17  -5 2028.69  712.98
   0 -17   5  676.21  856.57
   0  17   5  483.28  294.28
   0  17  -5 1691.03  952.27
   0 -17  -5  270.88  462.90
   0 -17  -6 3423.29 2025.26
   0 -17   6 4595.55 2158.29
   0  17   6 4463.28 1211.51
   0  17  -6 4105.64 1200.93
   0 -17  -6 5047.37 1193.87
   0 -17  -7   15.22  503.07
   0 -17   7  545.84  692.70
   0  17   7  891.63  351.03
   0  17  -7 1142.00  944.18
   0 -17  -7  777.98  699.16
   0 -17  -8  945.96  313.20
   0 -17   8  885.39 1530.80
   0  17   8 1731.70  687.32
   0  17  -8 1917.68 1128.11
   0 -17  -8 1807.54  990.74
   0 -17  -9 1752.39  903.51
   0 -17   9 1925.20 1336.39
   0  17   9 1205.22  616.65
   0  17  -9  182.52  774.81
   0 -17  -9 4493.78 1318.89
   0 -17  10 1122.61  610.72
   0  17  10 1392.63  546.66
   0  17 -10  348.06  622.86
   0 -17 -10  825.81  840.33
   0 -17  11 2177.68  820.55
   0  17  11 1409.75  467.21
   0  17 -11  990.48  639.88
   0 -17 -11  261.62  686.86
   0 -17  12  349.08  535.00
   0  17  12  575.73  361.95
   0  17 -12  832.38 1015.01
   0 -17 -12 3943.01 1776.52
   0 -17  13  851.15  889.46
   0  17  13  668.64  269.34
   0  17 -13 1317.07  606.29
   0 -17 -13  703.63  769.54
   0 -17  14  901.57  668.25
   0  17  14  634.87  487.02
   0  17 -14 1109.38 1074.69
   0 -17 -14   99.38  669.00
   0 -17  15 1639.72 1288.59
   0  17  15 2505.75  858.06
   0  17 -15 2708.52 1036.62
   0 -17 -15  333.50  773.40
   0  17  16  448.89  334.46
   0  17 -16 3359.58 1353.64
   0 -17 -16 1462.86  722.46
   0 -17  17  488.63  701.22
   0  17  17  616.74  415.77
   0  17 -17  792.87  706.88
   0 -17 -17  780.67  659.52
   0 -17  18 -258.92  870.15
   0  17  18  953.63  581.06
   0  17 -18 -253.29 1003.08
   0 -17 -18  -13.94  620.09
   0  17  19  345.39  398.41
   0 -17 -19  357.00  651.75
   0  17  20 3665.05 1130.32
   0 -18   0 2541.50 1583.55
   0  18   0 4623.67 2292.31
   0 -18  -1   78.34  601.28
   0 -18   1 1503.95  953.60
   0  18  -1 1835.69  906.99
   0  18   1  844.64  820.15
   0 -18  -2 1733.86  990.10
   0 -18   2 1125.79  586.58
   0  18   2 2021.32  973.76
   0  18  -2 2105.86 1995.98
   0 -18  -3 2515.66 1116.71
   0 -18   3  281.40  624.98
   0  18   3 1162.51  882.72
   0  18  -3 2591.10 1319.51
   0 -18  -4 1920.41 1149.66
   0 -18   4 2784.74  994.08
   0  18  -4  652.37  578.09
   0 -18  -5 1253.61 1076.41
   0 -18   5  339.77  735.72
   0  18  -5  898.04  741.37
   0 -18  -5  983.37  676.05
   0 -18  -6  469.13  492.35
   0 -18   6  939.29  784.85
   0  18  -6 -313.78  906.93
   0 -18  -6  613.62  624.21
   0 -18  -7 3142.27  908.45
   0 -18   7 1584.43 1274.76
   0  18   7  581.61  251.35
   0  18  -7 1068.61  835.35
   0 -18  -7 2175.94 1400.87
   0 -18  -8  -75.35  555.82
   0 -18   8  440.62  944.90
   0  18   8  793.10  389.88
   0  18  -8 -234.72  947.15
   0 -18  -8  296.31  948.84
   0 -18   9  712.16  914.68
   0  18   9 2829.58 1294.76
   0  18  -9 3325.20 1027.29
   0 -18  -9  813.89  980.30
   0 -18  10 2340.30 1078.63
   0  18  10  -86.63  344.98
   0  18 -10 1152.13  542.31
   0 -18 -10 1718.76 1394.98
   0 -18  11 -385.53  871.31
   0  18  11  293.71  458.36
   0 -18 -11 1192.15  596.89
   0 -18  12  114.49  723.29
   0  18  12 -448.75  569.92
   0  18 -12 1004.25  504.36
   0 -18 -12 1334.55  614.66
   0 -18  13  373.04  732.59
   0  18  13  -80.13  561.06
   0  18 -13  599.13 1099.17
   0 -18 -13  906.30  600.85
   0 -18  14 1054.88 1266.14
   0  18  14  858.96  525.48
   0  18 -14 1987.74  937.87
   0 -18 -14  929.89  607.38
   0  18  15  304.05  374.99
   0  18 -15 1312.22 1408.00
   0 -18 -15 1301.73  732.83
   0  18  16 8770.31 2551.72
   0  18  17  808.78  503.73
   0  18  18 3221.02  690.30
   0 -19   0   21.63 1004.04
   0  19   0 1090.49  562.00
   0 -19  -1 -794.09  614.31
   0 -19   1 1473.36 1115.20
   0  19   1 1809.03 1168.44
   0  19  -1  955.89 1628.05
   0 -19  -2  860.79  352.96
   0 -19   2  874.37  919.64
   0  19   2 1373.23 1074.14
   0  19  -2 1231.77 1046.00
   0 -19  -3 1877.85 1169.23
   0 -19   3 1498.18  835.74
   0  19   3 1032.79 1147.59
   0  19  -3 3687.03 2304.30
   0 -19  -4  899.66  430.20
   0 -19   4 1134.31 1252.31
   0  19  -4 1601.66  998.76
   0 -19  -4 1250.68  752.63
   0 -19  -5 1902.49  977.21
   0 -19   5  621.50  913.42
   0  19  -5 1070.40 1178.66
   0 -19  -5 2843.99  899.50
   0 -19  -6  858.93  597.13
   0  19  -6  236.18  874.93
   0 -19  -6 1250.30  894.54
   0 -19  -7  494.87  317.75
   0 -19   7  455.89  938.66
   0  19  -7 -731.16  987.70
   0 -19  -7  688.11 1056.81
   0 -19   8  491.51  742.67
   0  19  -8 2519.86 1316.71
   0 -19  -8  908.51  736.03
   0 -19   9 2738.87 1140.48
   0  19  -9 5141.26 2394.30
   0 -19  -9 1576.12 1320.93
   0 -19  10  619.68  495.53
   0 -19 -10  825.57  692.22
   0 -19 -11  899.67  492.27
   0  19  13 1195.18  469.17
   0  19  14 4195.24  971.09
   0  19  15  296.21  228.73
   0  19  16  408.86  339.50
   0 -20   0  839.53  938.40
   0 -20  -1 7219.28 1337.67
   0 -20   1 1936.78  914.23
   0 -20   2  635.90  560.39
   0 -20  -2 1420.91 1024.62
   0 -20  -3 1197.36  650.63
   0 -20   3 1536.79 1147.66
   0 -20  -4  401.59  663.20
   0 -20   4  431.25  450.75
   0 -20  -5  399.61  621.49
   1   0 -38  262.03  370.67
   1   0 -37  460.34  525.04
  -1   0  36  585.55  454.67
   1   0 -36 1081.66  760.98
   1   0 -36 1963.39  962.90
  -1   0  35  515.81  541.91
   1   0 -35 1051.19  416.30
   1   0 -35  333.30  447.37
  -1   0  34  200.83  494.66
   1   0 -34  817.42  305.14
   1   0 -34  748.39  769.13
  -1   0  33 -674.80  689.20
   1   0 -33  427.26  423.86
   1   0 -33 1774.39  955.69
  -1   0  32  480.55  625.05
   1   0 -32  212.45  285.59
   1   0 -32  802.87  352.44
  -1   0  31  107.11  447.90
   1   0 -31  522.10  514.91
   1   0 -31  512.06  540.32
  -1   0  30 -163.81  503.48
   1   0 -30  465.94  403.49
   1   0 -30  -64.50  556.74
  -1   0  29  575.17  596.17
   1   0 -29  -51.39  196.63
   1   0 -29  160.62  686.29
  -1   0  28 2746.87 1093.66
   1   0 -28 3335.74  647.69
   1   0 -28 2566.52  332.30
  -1   0  27  692.98  388.64
   1   0 -27  477.30  324.47
   1   0 -27 -910.30  591.09
  -1   0  26 5068.45 1623.09
   1   0 -26 3574.75 1356.15
   1   0 -26 4462.06  958.62
  -1   0  25  106.51  125.70
  -1   0  25   84.05  322.16
   1   0 -25  364.26  228.17
   1   0 -25  404.81  567.09
  -1   0  24  100.95  268.25
  -1   0  24   38.95  251.67
   1   0 -24  143.55  282.91
   1   0 -24 1333.20  653.61
  -1   0  23  125.86   94.18
  -1   0  23  169.16  131.53
  -1   0  23  788.64  468.28
   1   0 -23  175.59  207.94
   1   0 -23  333.00  516.20
  -1   0  22  331.63   87.90
  -1   0  22   -5.64  187.90
  -1   0  22  332.07  324.84
   1   0 -22  423.31  369.75
   1   0 -22  490.66  340.26
  -1   0  21  197.77  186.88
  -1   0  21  419.33  348.81
  -1   0  21 1317.06  578.17
   1   0 -21  -41.12  424.95
   1   0 -21  239.73  713.46
  -1   0  20 1541.21  272.05
  -1   0  20 1834.27  460.76
  -1   0  20 1646.82  459.85
   1   0 -20 1643.15  662.94
   1   0 -20 1595.30  494.48
  -1   0  19  332.03  122.78
  -1   0  19  326.31  114.53
  -1   0  19  231.24  182.04
   1   0 -19  824.01  381.46
   1   0 -19  729.13  325.46
  -1   0  18  129.01   82.79
  -1   0  18  105.02  105.49
  -1   0  18  470.92  235.12
   1   0 -18  507.31  310.44
  -1   0  17  -23.21  110.09
  -1   0  17   68.15  119.62
  -1   0  17  324.83  261.79
  -1   0  17  227.94  177.65
   1   0 -17  194.34  493.09
  -1   0  16 3836.13  544.04
  -1   0  16 3513.95  713.62
  -1   0  16 5267.48  513.64
  -1   0  16 4414.47 1363.72
   1   0 -16 3935.11  583.39
  -1   0  15  287.05  131.87
  -1   0  15   95.36  211.46
  -1   0  15   42.65  304.26
   1   0 -15  413.45  286.80
  -1   0  14 -273.70  136.51
  -1   0  14   39.18  160.27
  -1   0  14  302.95  259.24
   1   0 -14 -224.33  438.75
  -1   0  13  186.19  102.62
  -1   0  13  252.37  201.38
  -1   0  13 -211.20  358.03
  -1   0  13  251.01  442.83
   1   0 -13  442.09  382.49
  -1   0  12 8796.17  493.89
  -1   0  12 9174.19  524.82
  -1   0  12 9744.96 1067.43
  -1   0  12 9863.20 1152.55
   1   0 -12 7162.38  632.85
   1   0 -12 8446.99  525.10
  -1   0  11  141.96  119.69
  -1   0  11 -240.40  171.03
  -1   0  11 -128.72  279.68
   1   0 -11   44.77   81.72
  -1   0  11  -60.40  341.52
   1   0 -11 -288.70  255.32
   1   0 -11 -100.87  348.99
  -1   0  11  -88.65  189.88
  -1   0  10  489.39  134.17
  -1   0  10  382.58  232.77
  -1   0  10  600.10  292.03
   1   0 -10  514.90  159.06
  -1   0  10  413.23  180.64
   1   0 -10  531.04  204.97
   1   0 -10  773.61  334.72
  -1   0  10  266.38   96.73
  -1   0   9  295.65  113.41
  -1   0   9  131.51   72.26
  -1   0   9  -73.95  270.71
   1   0  -9   55.75   88.27
  -1   0   9  189.20  145.01
   1   0  -9 -142.83  253.41
   1   0  -9  372.69  260.91
  -1   0   9  109.36  114.59
  -1   0   8  183.57  188.63
  -1   0   8  322.11   87.25
  -1   0   8  203.60  208.10
   1   0  -8  149.63  142.58
  -1   0   8   73.83  167.59
   1   0  -8  439.57  201.28
   1   0  -8  290.65  181.51
  -1   0   8  237.01  141.92
  -1   0   7   87.51  111.14
   1   0  -7 -109.70  126.32
  -1   0   7 -844.90  394.95
   1   0  -7 -292.90  258.55
  -1   0   7 -194.17  327.87
   1   0  -7 -280.99  320.18
   1   0  -7 -266.37  299.25
  -1   0   7 -493.56  272.00
   1   0  -6 1192.82  283.79
  -1   0   6  865.38  566.47
   1   0  -6 1295.52  549.21
   1   0  -6 1198.47  406.29
   1   0  -6 1473.80  412.08
   1   0  -6  818.06  351.40
  -1   0   6 1098.28  528.93
   1   0  -5  153.39  102.23
   1   0  -5  497.43  312.68
   1   0  -5 -138.24  286.17
  -1   0   5  147.43  179.33
   1   0  -4 6049.71  276.50
   1   0  -4 6419.02  274.72
  -1   0   4 7313.19  561.74
  -1   0   4 6627.93  359.24
   1   0  -3  -55.46  146.13
  -1   0   3   14.09  127.91
  -1   0   3   13.78   51.10
   1   0   2 1547.11  174.37
  -1   0  -2 1473.55  152.36
  -1   0  -2 1492.81  479.06
   1   0   2 1392.25  110.89
   1   0   3  -44.55  157.95
  -1   0  -3 -192.41  213.35
  -1   0  -3  -96.27  265.69
   1   0   3   -5.26  184.97
   1   0   4 2986.31  812.85
  -1   0  -4 3046.94  883.75
  -1   0  -4 3299.37  840.40
   1   0   4 3992.81  890.90
  -1   0  -5  511.32  319.76
   1   0   5  614.41  302.06
   1   0   5  815.94  647.58
  -1   0  -5 1836.95  636.73
   1   0   5  632.99  329.55
  -1   0  -5  750.22  612.58
  -1   0  -5  263.66  272.22
   1   0   5 1052.03  504.13
  -1   0  -6 -223.84  259.06
   1   0   6  127.96  227.50
   1   0   6 -542.58  349.53
  -1   0  -6 -479.79  387.99
   1   0   6 -723.27  492.23
  -1   0  -6 -171.84  440.52
  -1   0  -6 -425.50  329.03
   1   0   6 -402.81  321.79
  -1   0  -7  -41.15  104.79
   1   0   7  -32.78   83.04
   1   0   7 -113.40  245.78
  -1   0  -7   80.80  289.06
   1   0   7   30.63  237.69
  -1   0  -7   64.20  161.26
  -1   0  -7  -46.87  258.83
   1   0   7   40.08  133.57
  -1   0  -8 2684.61  677.06
   1   0   8 3180.05  420.30
   1   0   8 2925.26  255.16
  -1   0  -8 3445.74  273.81
   1   0   8 3094.04  943.31
  -1   0  -8 2698.15  303.63
  -1   0  -8 3724.57 1048.87
   1   0   8 2603.87  258.88
  -1   0  -9   -3.56  230.32
   1   0   9 -112.29  147.74
   1   0   9  239.22   73.54
  -1   0  -9  161.26  124.77
   1   0   9  -94.38  389.06
  -1   0  -9  -44.57  205.62
  -1   0  -9   54.44  149.48
   1   0   9 -225.08  219.96
  -1   0 -10 3775.84 1110.14
   1   0  10 3916.22  327.01
   1   0  10 3535.47  351.03
  -1   0 -10 3044.15  228.97
   1   0  10 3596.55  954.25
  -1   0 -10 2924.97  940.93
  -1   0 -10 3376.80 1000.16
   1   0  10 4093.76  453.04
  -1   0 -11  593.45  318.11
   1   0  11  -92.42  125.79
   1   0  11 -208.02  294.40
   1   0  11  203.53  274.48
  -1   0 -11  154.95  134.60
  -1   0 -11  420.92  215.40
  -1   0 -12  314.35  222.27
   1   0  12  420.11  126.62
   1   0  12  573.77  253.74
   1   0  12   61.21  256.14
  -1   0 -12  398.56  314.99
  -1   0 -12  569.90  420.20
  -1   0 -13  279.34  223.20
   1   0  13  118.60  110.91
   1   0  13 -290.70  260.12
   1   0  13  168.21  304.94
  -1   0 -13   85.39  260.79
  -1   0 -14  319.77  316.30
   1   0  14  706.94  130.11
   1   0  14  896.47  260.84
   1   0  14  668.00  217.25
  -1   0 -14  483.06  356.03
  -1   0 -15  274.35  180.28
   1   0  15  107.27   98.14
   1   0  15  464.89  175.56
   1   0  15 -327.57  356.88
  -1   0 -15  294.95  180.43
  -1   0 -16 1705.51  551.55
   1   0  16 1909.02  306.64
   1   0  16 2109.79  544.67
   1   0  16 2553.98  539.25
  -1   0 -16 1724.56  574.42
  -1   0 -17  324.73  259.20
   1   0  17   22.91  116.39
   1   0  17  603.31  344.92
   1   0  17  528.88  197.22
  -1   0 -17  278.02  211.45
  -1   0 -18  369.82  220.94
   1   0  18  526.92  183.91
   1   0  18  202.09  194.40
   1   0  18  210.03  503.37
  -1   0 -18  709.29  541.63
  -1   0 -19  315.17  217.52
   1   0  19   27.33  104.08
   1   0  19  408.27  256.13
   1   0  19 -218.89  405.99
  -1   0 -19   38.17  200.14
   1   0  20  258.02  121.83
   1   0  20  -96.61  410.44
   1   0  20  549.02  440.29
  -1   0 -20  918.76  689.66
   1   0  21  215.46  134.04
   1   0  21   43.65  234.63
   1   0  21  631.75  196.78
   1   0  21  284.81  334.71
  -1   0 -21  -43.66  551.63
   1   0  22 3759.19  981.85
   1   0  22 3659.15  966.02
   1   0  22 4657.14 1310.29
  -1   0 -22 5140.74 1417.53
   1   0  23  783.31  349.33
   1   0  23  285.79  241.52
   1   0  23  365.90  278.94
  -1   0 -23 -736.97  580.39
   1   0  24 5560.45 1389.05
   1   0  24 6797.81  824.31
   1   0  24 7237.83 1029.40
  -1   0 -24 5149.02 1341.48
   1   0  25  202.22  210.29
   1   0  25 -202.15  461.03
   1   0  25  246.44  240.30
  -1   0 -25 1020.32  407.07
   1   0  26  566.40  292.64
   1   0  26 -127.01  482.93
   1   0  26 1374.25  391.19
  -1   0 -26 1149.64  858.94
   1   0  27 -124.29  552.35
   1   0  27  -81.73  422.56
  -1   0 -27  339.28  298.69
   1   0  28 2381.93 1048.95
  -1   0 -28 3029.22  867.62
  -1   0 -28 4231.09  921.75
   1   0  29  249.21  363.93
  -1   0 -29  628.27  525.94
  -1   0 -29  412.78  200.75
   1   0  30 2016.24  866.26
  -1   0 -30  640.06  290.54
  -1   0 -30 1789.83  893.27
   1   0  31  486.53  413.88
  -1   0 -31  195.41  362.94
  -1   0 -31  776.41  738.09
   1   0  32  331.12  404.36
  -1   0 -32  176.23  252.64
  -1   0 -32  724.26  320.82
   1   0  33  175.68  675.59
  -1   0 -33  -62.90  393.62
  -1   0 -33  347.94  564.09
   1   0  34 2055.23  959.18
  -1   0 -34  666.01  579.72
  -1   0 -34  205.97  535.96
   1   0  35  419.15  336.57
  -1   0 -35  196.08  347.23
  -1   0 -35  442.53  846.14
  -1   0 -36  467.94  465.34
  -1   0 -37   56.67  220.75
   1   1 -38  561.32  339.07
   1  -1 -38  456.57  444.40
   1   1 -37  310.72  468.82
   1  -1 -37  -80.09  441.16
  -1  -1  36  -84.84  672.76
  -1   1  36  417.12  295.77
   1   1 -36  527.11  606.51
   1  -1 -36  992.02  536.21
   1   1 -36  215.21  463.19
   1  -1 -36  565.27  628.25
  -1  -1  35 1274.13 1436.48
  -1   1  35 2018.53  931.34
   1   1 -35 1050.64  675.91
   1  -1 -35  578.22  679.25
   1   1 -35 1452.44 1039.48
   1  -1 -35   -0.68  595.93
  -1   1  34  285.56  896.77
  -1  -1  34 1015.55  513.17
   1  -1 -34  500.41  305.94
   1   1 -34  265.62  481.45
   1  -1 -34  550.66  765.98
  -1   1  33 2313.99 1139.22
  -1  -1  33 1777.14 1240.32
   1   1 -33 2934.06 1097.14
   1  -1 -33 3350.15  908.80
   1   1 -33 3166.43 1379.10
   1  -1 -33 4655.12 1898.38
  -1   1  32 1998.05 1021.98
  -1  -1  32 2141.92  697.85
   1   1 -32 1401.26 1857.83
   1  -1 -32 2033.32  732.96
   1   1 -32 1938.97  941.60
   1  -1 -32 2649.46 1041.25
  -1   1  31  153.65  288.83
  -1  -1  31 1213.33  582.22
   1   1 -31 1255.03  625.21
   1  -1 -31 1286.55  526.30
   1   1 -31 1800.09  712.86
   1  -1 -31 1870.05  696.70
  -1   1  30  -48.11  525.86
  -1  -1  30 1141.91 1103.31
   1   1 -30  987.97  475.58
   1  -1 -30  270.00  390.87
   1   1 -30  304.87  374.93
   1  -1 -30  292.85  529.86
  -1  -1  29  906.32  734.72
  -1   1  29 1569.30  941.36
   1   1 -29  719.79  395.50
   1  -1 -29  542.30  335.37
   1   1 -29 1081.74  927.50
   1  -1 -29 1316.24  729.84
  -1  -1  28 1159.51  663.55
  -1   1  28 1396.03  378.16
   1   1 -28 1884.56  518.68
   1  -1 -28 1887.16  682.47
   1   1 -28 1085.18  483.03
   1  -1 -28 1088.33  474.39
  -1  -1  27  -90.99  282.05
  -1   1  27 -509.27  623.82
   1   1 -27  254.79  156.31
   1  -1 -27  179.93  464.59
   1   1 -27 -844.69  580.35
   1  -1 -27  311.18  558.54
  -1  -1  26 2014.44  502.57
  -1   1  26 3091.56 1239.59
  -1  -1  26 2226.56  938.07
   1   1 -26 3070.96  802.78
   1  -1 -26 2256.72  708.41
   1   1 -26 2987.68  935.39
   1  -1 -26 2762.70 1122.35
  -1  -1  25  280.36  320.68
  -1   1  25  139.35  481.42
  -1  -1  25  757.66  383.97
   1   1 -25  -21.11  392.32
   1  -1 -25  228.00  496.23
   1   1 -25  808.11  330.76
   1  -1 -25  641.63  495.06
  -1   1  24 3821.90  722.55
  -1  -1  24 5142.26 1213.20
  -1   1  24 5984.61 1194.49
  -1  -1  24 4268.78 1104.21
   1   1 -24 4663.01 1170.99
   1  -1 -24 5865.96 1443.49
   1   1 -24 4680.19 1113.89
   1  -1 -24 6073.57  841.56
  -1   1  23   60.20  114.79
  -1  -1  23  189.97  304.00
  -1   1  23   -6.28  446.77
  -1  -1  23  -65.69  547.24
   1   1 -23  256.75  262.61
   1   1 -23 -402.00  645.12
  -1  -1  22 2065.93  343.72
  -1   1  22 1995.05  384.03
  -1   1  22 2104.61  467.53
  -1  -1  22 2520.83  651.03
  -1   1  22 3463.01  858.57
  -1  -1  22 2892.69  504.38
  -1   1  22 2167.67  695.75
   1   1 -22 2251.58  520.57
   1   1 -22 2160.24  659.58
   1  -1 -22 3846.97  830.83
  -1  -1  2112821.92 1116.78
  -1   1  2113896.52  592.08
  -1   1  2113920.73 1080.98
  -1  -1  2114102.72 1141.55
  -1   1  2115357.95 1112.44
  -1   1  2116327.08 1269.12
   1   1 -2114730.78  673.11
   1   1 -2117020.45 3695.71
   1  -1 -2115273.20 2243.84
  -1  -1  20  192.25  142.27
  -1   1  20  127.34   90.84
  -1   1  20  251.20  170.24
  -1  -1  20 -256.90  303.22
  -1   1  20  -38.83  290.37
  -1   1  20 -346.13  500.29
   1   1 -20  131.35  263.16
   1   1 -20   53.42  380.02
   1  -1 -20  137.55  328.44
  -1  -1  1913834.82  773.35
  -1   1  1914892.73  485.96
  -1   1  1914512.47  510.55
  -1  -1  1914676.17 1007.19
  -1   1  1913971.46 1016.67
  -1   1  1914425.19 1318.79
   1   1 -1915428.95  717.37
   1   1 -1915387.63  870.52
   1  -1 -1916115.17 1534.38
  -1  -1  18 3990.19  565.84
  -1   1  18 4564.16  419.48
  -1   1  18 4837.21  598.72
  -1  -1  18 5839.32 1695.46
  -1   1  18 4432.23  435.82
  -1  -1  18 5322.10 1614.42
  -1   1  18 6783.61 1871.40
   1   1 -18 5515.22 1557.47
   1   1 -18 5098.37 1527.51
   1  -1 -18 6086.59 1737.94
  -1  -1  1712931.03  705.17
  -1   1  1715741.08  676.36
  -1   1  1714237.16  826.32
  -1  -1  1713779.35 1156.47
  -1   1  1715822.33 1870.32
  -1  -1  1713571.02  796.10
  -1   1  1715779.98 1219.61
   1   1 -1714616.19 1223.36
   1   1 -1715990.72 1164.45
   1  -1 -1716639.89 1127.55
  -1  -1  1618575.24 1216.50
  -1   1  1618641.03  735.45
  -1   1  1617616.30  838.18
  -1  -1  1618364.68 1129.85
  -1   1  1618263.67  928.50
  -1  -1  1617192.66  778.38
  -1   1  1620751.15 1109.96
   1   1 -1617395.60  679.84
   1   1 -1620539.86 2158.60
   1  -1 -1618764.29 1888.07
  -1  -1  1511790.12  592.87
  -1   1  1514134.03  311.07
  -1   1  1512034.25  509.65
  -1  -1  1513692.08 1101.47
  -1   1  1513897.00  626.76
  -1  -1  1513086.47  512.15
  -1   1  1514724.38  954.77
   1   1 -1513857.61  777.36
   1   1 -1513237.99  863.56
   1  -1 -1514677.88 1959.10
  -1  -1  1412863.20  736.02
  -1   1  1413236.15  350.21
  -1   1  1412852.86  612.08
  -1  -1  1411818.71 1172.98
  -1   1  1411796.06  577.54
  -1  -1  1411873.28  584.89
  -1   1  1412934.45 1877.09
   1   1 -1412677.98  637.75
   1   1 -1411993.45 1580.71
   1  -1 -1411956.96 1043.92
  -1  -1  1335465.06 1529.71
  -1   1  1336524.73 1372.45
  -1   1  1334748.72 1351.79
  -1  -1  1335201.09 1620.41
  -1   1  1340033.28 1619.63
  -1  -1  1341214.13 1664.98
  -1   1  1340323.29 1671.49
   1   1 -1336252.55 1794.22
   1   1 -1337405.76 1629.73
   1  -1 -1337961.82 1599.08
  -1  -1  1221369.86  798.97
  -1   1  1224230.43  930.23
  -1   1  1222507.35  906.32
  -1  -1  1221233.09  917.82
  -1   1  1221027.88  665.29
  -1  -1  1219168.10  923.07
  -1   1  1223002.58 1065.24
   1   1 -1221173.14  715.15
   1   1 -1223427.60 1015.20
   1   1 -1222352.88 1150.29
   1  -1 -1224225.24 1215.82
  -1  -1  11 3978.04  628.92
  -1   1  11 3541.14  332.08
  -1   1  11 3621.23  360.34
  -1  -1  11 5074.26 1239.95
  -1   1  11 4143.43 1290.26
  -1  -1  11 3991.54  455.56
   1  -1 -11 3283.62  197.69
   1   1 -11 3508.03  199.14
  -1   1  11 4262.94  987.04
   1   1 -11 3730.59  862.91
   1  -1 -11 3303.16  739.28
   1   1 -11 3720.92  377.98
   1   1 -11 5670.52 1082.51
  -1  -1  11 3837.52  293.64
   1  -1 -11 3202.72  350.41
  -1   1  11 4282.60  883.52
  -1  -1  10 4675.46  762.03
  -1   1  10 4701.01  246.06
  -1  -1  10 4916.48  769.73
  -1   1  10 4247.84  327.31
  -1  -1  10 5136.89  416.02
   1  -1 -10 4431.47  380.77
   1   1 -10 5081.40  399.13
  -1   1  10 4713.23 1077.87
   1   1 -10 4169.87  279.30
   1  -1 -10 5095.78 1098.08
   1   1 -10 5184.72  965.09
   1   1 -10 7040.88 1925.09
  -1  -1  10 5227.47  547.64
   1  -1 -10 5258.83  689.07
  -1   1  10 4866.08  550.98
  -1  -1   9  794.91  425.96
  -1   1   9  831.89  128.06
  -1  -1   9  574.85  251.30
  -1   1   9  415.92  244.18
  -1  -1   9  809.28  254.50
   1  -1  -9  841.33  237.04
   1   1  -9  440.41  149.45
  -1   1   9 1218.31  571.80
   1   1  -9  563.34  253.71
   1  -1  -9  458.20  160.22
   1   1  -9  354.26  190.71
   1   1  -9  426.49  482.47
  -1  -1   9  767.95  254.72
   1  -1  -9  483.81  242.71
  -1   1   9  573.31  412.11
  -1   1   8  998.50  176.86
  -1  -1   8 1125.79  427.58
  -1   1   8  999.27  255.15
  -1  -1   8  945.30  302.59
   1  -1  -8 1002.89  207.11
   1   1  -8 1284.08  320.44
   1   1  -8  875.84  242.30
   1  -1  -8  885.55  266.91
   1   1  -8 1106.90  359.13
   1   1  -8   73.67  264.42
  -1  -1   8 1104.41  253.45
   1  -1  -8 1289.13  370.64
  -1   1   8 1093.79  347.97
  -1   1   715924.74  581.01
  -1  -1   718103.70  832.69
   1   1  -716368.84  669.35
  -1   1   717334.36 1095.72
   1  -1  -718190.59  713.20
  -1  -1   718556.09  801.77
   1   1  -716444.32  664.11
   1   1  -716701.71  870.25
  -1   1   717512.73  850.45
   1  -1  -716588.88 1075.17
   1   1  -717018.56 1003.87
   1   1  -716826.40  810.96
  -1  -1   717835.29 1056.69
   1  -1  -716290.58  705.99
  -1   1   716183.26  692.47
  -1  -1   6 3517.91  842.14
   1   1  -6 3949.06  858.43
  -1   1   6 4280.78  970.28
   1  -1  -6 3788.51  898.05
  -1  -1   6 4801.30  781.30
   1   1  -6 3554.67  250.77
  -1   1   6 3516.28  781.98
   1  -1  -6 3477.60  865.19
   1   1  -6 3880.66  955.24
  -1  -1   6 3594.03  807.11
   1   1  -6 4635.75 1036.15
  -1  -1   6 3216.95  929.30
   1  -1  -6 4065.00  833.21
  -1   1   6 4307.82 1150.50
  -1  -1   521450.73 1313.71
   1   1  -519976.62 1052.55
  -1   1   523183.02 1497.70
   1  -1  -521659.18 1082.88
   1   1  -520713.19  831.98
   1  -1  -522479.59  730.33
   1   1  -520472.15 1248.16
  -1  -1   519135.18  834.00
  -1  -1   521830.00 1378.92
  -1   1   521096.78  976.71
   1  -1  -4 4305.57  160.33
   1   1  -4 4380.30  374.13
   1  -1  -4 5023.40  428.98
   1   1  -4 4604.51  267.54
   1  -1  -4 4966.21  353.07
  -1  -1   4 4392.50  687.09
  -1  -1   4 5210.01  575.51
  -1   1   4 4451.86  267.95
   1  -1  -312536.07  443.06
   1   1  -311834.93  599.32
   1  -1  -311664.21  465.87
   1   1  -312002.41  580.27
   1  -1  -313012.52  517.07
  -1  -1   312347.63  632.77
  -1   1   312541.38  507.47
   1   1  -2  623.25  171.40
   1  -1  -2  136.00  151.59
   1   1  -2  -23.22  105.75
   1  -1  -2  318.43   65.15
  -1  -1   2  222.55  134.91
  -1  -1   2  163.23  116.34
  -1   1  -1101204.6 1800.87
   1   1   197895.88 1751.42
   1  -1   2 -101.25  205.68
   1   1   2  106.86   92.17
  -1  -1  -2 -111.33  124.21
  -1   1  -2   12.86  232.27
  -1  -1  -2   94.82  176.17
  -1   1  -2   54.13   75.72
   1  -1   2  -11.68  136.37
   1   1   2  177.82  105.39
   1  -1   3  624.88  418.39
   1   1   3  110.62  212.98
  -1  -1  -3  310.62  186.63
  -1   1  -3  240.08  396.01
  -1   1  -3 -143.79  210.65
  -1  -1  -3  -71.49  418.50
   1  -1   3  573.71  139.79
   1   1   3  186.27  119.67
   1  -1   4175706.9 3143.01
  -1  -1  -4182235.9 3412.12
   1   1   4176272.7 3214.96
  -1  -1  -5343476.7 6047.53
  -1   1  -6 -281.72  349.03
   1  -1   6 -145.34  773.16
  -1  -1  -6 -127.15  175.97
   1   1   6   17.46  146.25
   1   1   6 -122.94  311.18
   1  -1   6 -288.59  367.14
  -1  -1  -6 -333.08  344.37
  -1   1  -6 -285.50  404.84
   1  -1   6   71.76  265.15
   1   1   6-1318.77  705.90
  -1   1  -6 -144.36  327.59
  -1  -1  -6 -505.23  489.20
  -1   1  -6 -374.65  405.74
   1  -1   6   49.49  196.84
  -1  -1  -6 -325.22  349.42
   1   1   6  -86.49  357.59
  -1   1  -712823.09 1026.24
   1  -1   712804.59  748.69
  -1  -1  -712942.83  529.59
   1   1   714011.57  574.79
   1   1   713189.91  555.71
   1  -1   713927.67  978.87
  -1  -1  -711902.31  506.20
  -1   1  -711369.75  509.45
   1  -1   713283.61  637.54
   1   1   712943.46  843.32
  -1   1  -712538.32  887.08
  -1  -1  -713295.29  671.14
  -1   1  -712417.07  784.98
   1  -1   712081.72  552.04
  -1  -1  -710559.90 1051.89
   1   1   712763.86  615.07
  -1   1  -8 1328.96  308.94
   1  -1   8  939.58  243.07
  -1  -1  -8  819.70  254.34
   1   1   8  753.57  192.19
   1   1   8  940.92  225.95
   1  -1   8  667.01  269.21
  -1  -1  -8  867.17  205.83
  -1   1  -8  445.28  165.04
   1  -1   8  550.85  329.11
   1   1   8  773.69  558.44
  -1   1  -8  803.45  283.82
  -1  -1  -8  630.96  296.81
  -1   1  -8  684.53  196.89
   1  -1   8 1042.36  252.24
  -1  -1  -8  327.94  258.76
   1   1   8  659.44  262.57
  -1   1  -9  266.99  364.85
   1  -1   9  350.74  157.02
  -1  -1  -9  105.79   99.08
   1   1   9  116.66  113.32
   1   1   9  287.12  164.50
   1  -1   9  322.60  151.94
  -1  -1  -9  193.90  176.49
  -1   1  -9  256.68  212.23
   1  -1   9  423.72  178.38
   1   1   9  366.28  544.75
  -1   1  -9  559.46  233.78
  -1  -1  -9  482.64  234.18
  -1   1  -9   98.28  219.48
   1  -1   9  -48.76  209.46
  -1  -1  -9  -75.06  294.13
   1   1   9   79.60  202.60
  -1   1 -1027031.30 1764.69
  -1  -1 -1029219.91 1575.10
   1   1  1027456.45 1063.77
   1   1  1030143.04 1250.77
   1  -1  1029356.45 1271.73
  -1  -1 -1026747.60 1102.82
   1  -1  1030472.63 1373.15
   1   1  1027127.41 1755.90
  -1   1 -1027075.09 1126.29
  -1  -1 -1026148.80 1483.62
  -1   1 -1030442.90 1876.01
   1  -1  1028347.86 1185.11
  -1  -1 -1029159.34 1478.68
  -1   1 -11173319.3 2947.18
  -1  -1 -11173033.3 2926.09
   1   1  11166194.1 2600.62
   1  -1  11182857.8 3442.64
   1   1  11178908.2 3249.63
  -1   1 -11165633.9 2766.15
  -1  -1 -11165825.2 2888.76
  -1  -1 -11178328.1 3096.39
  -1   1 -1230216.21 1431.70
  -1  -1 -1232276.83 1541.65
   1  -1  1231283.84 1513.42
   1   1  1231188.38 1334.94
   1   1  1232876.15 1297.41
   1  -1  1232464.52 1508.66
   1   1  1228867.74 1363.23
  -1   1 -1234515.80 2404.25
  -1  -1 -1232007.91 2019.88
  -1   1 -13  426.29  304.35
  -1  -1 -13  259.12  217.77
   1  -1  13  301.28  179.46
   1   1  13  233.45  191.33
   1   1  13 -203.73  258.12
   1  -1  13  132.87  308.80
   1  -1  13   29.52  101.88
   1   1  13   86.28  270.86
  -1   1 -13  186.70  229.15
  -1   1 -13 -277.43  480.18
  -1  -1 -13 1419.92  470.44
  -1   1 -14 5154.98 1923.42
  -1  -1 -14 4336.66  749.32
   1  -1  14 4335.46  403.70
   1   1  14 4381.81  528.79
   1   1  14 5050.00  808.77
   1  -1  14 5190.05  923.13
   1   1  14 4986.54 1235.20
  -1   1 -14 6337.92 1255.02
  -1  -1 -14 6142.88 1518.27
  -1   1 -15  602.00  282.28
  -1  -1 -15  972.05  419.33
   1  -1  15  624.62  150.85
   1   1  15  813.40  201.06
   1   1  15  837.77  177.06
   1  -1  15  865.88  259.34
   1   1  15  937.36  788.31
  -1   1 -15  693.24  436.96
  -1  -1 -15 1122.08  448.20
  -1   1 -16 7328.23  583.79
  -1  -1 -16 8263.33 1082.77
   1  -1  16 6878.44  726.24
   1   1  16 8582.97  672.38
   1   1  16 9091.36  473.57
   1  -1  16 6972.51  643.46
   1   1  16 8015.37  929.47
  -1   1 -1610783.69 2413.58
  -1  -1 -16 7768.00  716.58
  -1   1 -1711555.80  862.24
  -1  -1 -1714273.46 1326.46
   1  -1  1711545.16  821.35
   1   1  1713245.37  533.42
   1   1  1715272.60  810.11
   1  -1  1714127.55 1197.76
   1  -1  1713133.91  525.39
   1   1  1713249.07  916.94
  -1   1 -1714244.10  981.05
  -1  -1 -1713323.75  868.56
  -1   1 -18  -92.64  338.72
  -1  -1 -18  335.50  229.81
   1   1  18  111.44   59.54
   1   1  18  164.30  146.79
   1  -1  18 -208.90  331.22
   1  -1  18  337.49  295.80
   1   1  18  323.05  248.15
  -1   1 -18 -167.63  523.36
  -1  -1 -18  681.98  417.99
  -1  -1 -19  118.50  231.47
   1   1  19  232.52  161.62
   1   1  19 1102.70  458.48
   1  -1  19   84.41  224.80
   1  -1  19  425.41  190.02
   1   1  19  790.87  426.07
  -1   1 -19 -162.47  544.88
  -1  -1 -19  866.33  335.40
  -1  -1 -20  687.83  218.26
   1   1  20  695.02  239.84
   1  -1  20 1017.95  331.16
   1  -1  20  713.00  365.83
   1   1  20 1341.45  400.19
   1  -1  20 1504.69  346.17
   1   1  20  662.59  320.98
  -1   1 -20  919.85  596.41
  -1  -1 -20  792.87  549.80
   1   1  21 2794.01  554.05
   1  -1  21 5568.01 1581.34
   1  -1  21 4753.58 1302.45
   1   1  21 4987.94 2005.25
   1  -1  21 5036.06  829.29
   1   1  21 5730.07 1846.21
  -1   1 -21 8003.26 1411.83
  -1  -1 -21 5255.44 1080.49
   1  -1  2214963.42  669.26
   1   1  2215190.21  538.63
   1   1  2217293.17 1048.62
   1  -1  2215116.81  946.27
   1  -1  2215997.56 1887.95
   1   1  2216777.56 1922.25
  -1   1 -2215275.52 1181.97
  -1  -1 -2215700.41 1126.24
   1   1  2317908.47  766.78
   1  -1  2318303.91 1030.43
   1   1  2319901.79 2722.19
   1  -1  2317471.73 2050.11
   1  -1  2318962.93 1446.86
   1   1  2319143.75 1556.21
  -1   1 -2316907.63 1512.77
  -1  -1 -2319099.04 1759.12
   1   1  24  258.16  225.42
   1  -1  24  803.19  364.38
   1   1  24  354.29  292.59
   1  -1  24  606.33  446.47
   1   1  24  350.05  326.24
  -1   1 -24  238.27  433.13
  -1  -1 -24  237.52  363.50
   1  -1  2511335.69 1135.19
   1   1  2510863.35  836.08
   1   1  2512463.42 1811.38
   1  -1  2511203.85 2597.09
   1   1  2514093.47 1195.79
  -1   1 -2514320.80  616.61
  -1   1 -2513844.92 1457.75
  -1  -1 -25 9982.32  907.92
   1  -1  26 1255.18  403.80
   1   1  26 1176.97  446.26
   1  -1  26  991.57  442.29
   1   1  26  948.13  444.92
  -1   1 -26 1393.20  656.87
  -1   1 -26  774.92  588.11
  -1  -1 -26  649.03  328.91
   1   1  27 4643.57 1567.75
   1  -1  27 4171.26 1422.39
   1   1  27 5541.91  920.21
  -1   1 -27 4270.03 1191.48
  -1   1 -27 3629.49 1446.01
  -1  -1 -27 4678.36 1362.38
   1   1  28 1976.11  715.03
   1  -1  28 2604.55  885.29
   1   1  28 3169.15  759.20
  -1   1 -28 3074.64 1240.81
  -1   1 -28 2487.58  883.57
  -1  -1 -28 3824.31 1531.27
   1   1  29 1580.65  725.99
   1  -1  29 2415.80  840.62
   1   1  29 2339.99  609.85
  -1   1 -29 3805.18 1220.94
  -1   1 -29 3881.88 1239.63
  -1  -1 -29 1773.04  968.47
   1   1  30  693.95  455.41
   1  -1  30 1395.20  788.76
  -1   1 -30  243.44  511.76
  -1  -1 -30  649.47  332.08
  -1   1 -30  113.87  615.82
  -1  -1 -30  521.86  973.40
   1   1  31  378.35  603.10
   1  -1  31  696.65  495.66
  -1   1 -31  998.86  687.97
  -1  -1 -31  523.03  457.08
  -1   1 -31 1507.06 1078.97
  -1  -1 -31  534.25  510.42
   1   1  32 -217.20  564.51
   1  -1  32  580.14  377.78
  -1   1 -32  385.58  217.66
  -1  -1 -32  738.50  580.29
  -1   1 -32  434.39  721.26
  -1  -1 -32  408.32  602.83
   1   1  33 1065.15  625.54
   1  -1  33  682.84  335.20
  -1   1 -33  424.28  336.78
  -1  -1 -33  955.92  388.53
  -1   1 -33  672.16  948.92
  -1  -1 -33  844.99  419.72
   1  -1  34  -91.62  674.13
   1   1  34 1078.81  624.71
  -1   1 -34  317.42  335.10
  -1  -1 -34   23.02  358.89
  -1   1 -34 1389.18 1425.10
  -1  -1 -34 1501.56  588.84
   1   1  35  970.14  600.78
   1  -1  35  570.06  520.93
  -1   1 -35  899.29  713.06
  -1  -1 -35  452.12  815.34
  -1   1 -35 1242.28  637.48
  -1  -1 -35  676.07  486.28
  -1   1 -36  575.22  487.96
  -1  -1 -36  276.70  373.85
  -1  -1 -37  177.01  259.83
   1   2 -37  452.84  294.72
   1  -2 -37  388.91  593.44
  -1   2  36 4969.30 1659.49
   1   2 -36 3699.93 2037.46
   1  -2 -36 3220.23 1921.75
   1   2 -36 3767.79 1875.14
   1  -2 -36 3274.60 1616.45
  -1   2  35  984.63  839.43
  -1  -2  35 1358.07  675.61
   1   2 -35  392.32  725.69
   1  -2 -35  945.59  683.51
   1   2 -35 1346.65  966.89
   1  -2 -35  528.83  466.48
  -1   2  34 1157.85 1056.88
  -1  -2  34  788.50  709.64
   1   2 -34  -77.12  427.26
   1  -2 -34  536.31  326.50
   1   2 -34  613.29  548.16
   1  -2 -34  530.13 1059.17
  -1   2  33 1528.40  874.34
  -1  -2  33  717.74  335.26
   1   2 -33  867.83  340.81
   1  -2 -33  347.29  406.08
   1   2 -33  125.92  556.09
   1  -2 -33 1362.44  700.69
  -1   2  32 2026.56 1699.59
  -1  -2  32 2157.82  730.34
   1   2 -32 2377.03 1031.38
   1  -2 -32 3365.26 1370.05
   1   2 -32 2265.40  610.98
   1  -2 -32 4237.76 1421.66
  -1   2  31 1188.41  608.19
  -1  -2  31 2850.31 1107.02
   1   2 -31 1109.64  525.15
   1  -2 -31 2150.22  962.28
   1   2 -31 1448.18  418.26
   1  -2 -31 2469.14 1215.67
  -1   2  30 1764.25  871.31
   1   2 -30 1198.39 1172.42
   1  -2 -30 1366.50  624.29
   1   2 -30  -64.60  638.58
   1  -2 -30 2120.01  647.45
  -1   2  29  340.13  380.37
   1   2 -29  669.91  585.98
   1  -2 -29  195.98  380.36
   1   2 -29  887.13  502.85
   1  -2 -29  304.61  515.86
  -1   2  28 1715.26  739.02
   1   2 -28 1882.29  565.90
   1  -2 -28 1705.27  825.21
   1   2 -28 2124.42 1196.52
   1  -2 -28  717.85  631.45
  -1  -2  27 1609.38  546.88
  -1   2  27 2148.48  754.08
   1   2 -27 1282.71  450.69
   1  -2 -27 2365.79  799.25
   1   2 -27  423.29  629.57
   1  -2 -27  581.87  279.53
  -1  -2  26 5205.40 2012.51
  -1   2  26 7698.92 2650.07
   1   2 -26 5761.27 1491.40
   1   2 -26 7660.77 1366.30
   1  -2 -26 5927.68 2380.87
  -1  -2  25  636.98  378.66
  -1   2  25  960.47  543.93
  -1  -2  25  359.36  683.59
  -1   2  25 -369.84  489.29
   1   2 -25  386.20  241.98
   1   2 -25  423.97  685.01
   1  -2 -25 -567.62  563.65
  -1  -2  2419540.85  901.82
  -1   2  2419314.03 1140.17
  -1  -2  2422148.15 1425.43
  -1   2  2420136.66  863.80
   1   2 -2416112.74 1324.51
   1   2 -2419675.91 1831.23
   1  -2 -2418228.82 1609.11
  -1  -2  2322460.03 1123.62
  -1   2  2320604.07 1113.25
  -1  -2  2321987.27 1955.49
  -1   2  2321923.88  843.12
   1   2 -2321615.70 1526.97
   1   2 -2321793.42 1373.57
   1  -2 -2322269.03 1151.92
  -1  -2  22  597.65  345.45
  -1   2  22  721.60  500.78
  -1  -2  22  407.55  502.40
  -1   2  22  204.77  185.76
   1   2 -22   79.84  324.61
   1   2 -22  349.63  412.35
   1  -2 -22  423.73  354.31
  -1  -2  21  379.45  363.49
  -1   2  21  726.20  437.04
  -1  -2  21  890.79  503.36
  -1   2  21  339.35  305.51
   1   2 -21  390.75  298.73
   1   2 -21 1646.79 1139.16
   1  -2 -21 2076.61  538.29
  -1  -2  20  166.28  392.40
  -1   2  20 1019.00  565.44
  -1  -2  20  615.14  276.92
  -1   2  20  690.07  448.18
   1   2 -20  -44.68  355.23
   1   2 -20  598.50  648.17
   1  -2 -20 1083.58  515.80
  -1  -2  19  530.20  523.83
  -1   2  19  398.43  569.86
  -1  -2  19  851.63  342.82
  -1   2  19  597.40  265.70
   1   2 -19  356.44  266.97
   1   2 -19  297.57  347.64
   1  -2 -19  647.93  327.17
  -1  -2  1822150.39 1287.80
  -1  -2  1822489.74 1167.23
  -1   2  1823486.32 1567.29
  -1  -2  1824414.26 1282.28
  -1   2  1824823.80 1313.78
   1   2 -1823136.04 1581.69
   1   2 -1824306.87 1338.69
   1  -2 -1822424.29 1366.21
  -1  -2  17 4251.76  913.50
  -1   2  17 4353.35  193.48
  -1  -2  17 4088.47 1281.62
  -1   2  17 5148.41 1632.58
  -1  -2  17 4958.80 1179.09
  -1   2  17 5417.75 1561.01
   1   2 -17 4981.97  517.26
   1   2 -17 5660.32 1038.19
   1  -2 -17 4955.04 1483.85
  -1  -2  16 5826.61 1166.22
  -1  -2  16 6695.66 1333.02
  -1   2  16 6417.45  610.66
  -1  -2  16 8167.36 1933.82
  -1   2  16 6371.11  528.67
   1   2 -16 5262.92  472.06
   1   2 -16 7097.04 1608.04
   1  -2 -16 5853.39  583.02
  -1  -2  15 1603.13  513.64
  -1  -2  15 1494.79  678.59
  -1   2  15 2599.86 1277.85
  -1  -2  15 3084.86  794.30
  -1   2  15 1784.21  792.47
   1   2 -15 2053.83  547.43
   1   2 -15 1496.23  887.41
   1  -2 -15 2432.73  694.00
  -1  -2  1442328.77 1134.58
  -1   2  1440650.30 1163.91
  -1  -2  1443089.84 1045.38
  -1   2  1442918.51 1194.73
   1   2 -1442170.06 1205.63
   1   2 -1440227.01 1260.50
   1  -2 -1437624.47 1035.77
  -1  -2  13 2202.98  633.55
  -1  -2  13 2350.81 1017.60
  -1   2  13 2452.19  550.75
  -1  -2  13 3736.74 1016.40
  -1   2  13 4243.36 1535.52
   1   2 -13 2342.88  815.75
   1   2 -13 2631.87  798.51
   1   2 -13 2820.61  615.52
   1  -2 -13 2997.68  836.08
  -1  -2  1255635.60 2188.90
  -1  -2  1253765.70 2140.79
  -1   2  1259048.61 1212.53
  -1  -2  1250171.59 2279.25
   1   2 -1252766.55 2035.06
  -1   2  1257795.58 1250.77
   1   2 -1256591.58  948.72
   1   2 -1257611.56 2772.71
   1  -2 -1257895.89 1323.04
  -1  -2  11 1284.20  354.96
  -1  -2  11  448.08  351.76
  -1   2  11  713.62  314.29
  -1  -2  11  870.04  349.41
   1  -2 -11  851.07  185.71
   1   2 -11  933.46  303.86
  -1   2  11  541.80  440.33
   1   2 -11  948.39  309.11
   1   2 -11  934.32  383.11
  -1  -2  11  764.42  236.23
   1  -2 -11  399.51  441.23
  -1   2  11  803.97  291.03
  -1  -2  1030704.80 1802.37
  -1  -2  1030656.38 1829.73
  -1   2  1030010.09 1094.55
  -1  -2  1027395.24 1293.60
   1  -2 -1026017.97  883.93
   1   2 -1028428.66 1055.20
   1   2 -1028509.63  984.88
  -1   2  1031039.26 1859.17
   1  -2 -1028714.79 1291.32
   1   2 -1027388.27 1280.93
   1   2 -1031792.48 1306.26
  -1  -2  1029430.22 1085.54
   1  -2 -1028462.80 1058.08
  -1   2  1028223.49 1027.20
  -1  -2   910003.56  755.56
  -1  -2   911607.38 1327.87
  -1   2   9 9737.84  829.74
  -1  -2   910238.02  506.29
   1  -2  -9 9341.26  233.94
   1   2  -911200.07  482.69
   1   2  -910668.43  472.63
  -1   2   911518.45 1290.90
   1  -2  -9 9619.58  542.91
   1   2  -910113.63  564.15
   1   2  -911616.99 1413.04
  -1  -2   910658.78  889.92
   1  -2  -910818.09  571.92
  -1   2   9 9704.29  520.74
  -1  -2   8  -66.38  307.31
   1   2  -8  490.57  235.85
  -1   2   8  971.08  191.76
   1  -2  -8  461.34  150.01
  -1  -2   8  759.56  296.83
   1   2  -8  259.85  121.87
  -1   2   8  422.16  251.87
   1  -2  -8  144.97  340.88
   1   2  -8  969.84  298.69
  -1  -2   8  601.70  199.31
   1   2  -8  686.76  327.01
  -1  -2   8  521.89  229.42
   1  -2  -8  647.73  338.13
  -1   2   8  715.63  201.77
  -1  -2   712012.51  762.79
   1   2  -713625.60  652.96
  -1   2   712034.22  762.85
   1  -2  -712022.99  513.40
  -1  -2   713579.85  578.38
   1   2  -714302.91  541.83
  -1   2   714858.67  796.10
   1  -2  -714858.24 1097.89
   1   2  -713071.69  611.69
  -1  -2   712877.05  645.32
   1   2  -713593.42  750.12
  -1  -2   711928.82  730.74
   1  -2  -713370.95  622.94
  -1   2   713289.80  916.41
   1  -2  -6 5014.90  158.53
   1  -2  -6 5118.63  264.54
  -1  -2   6 5933.69 1590.33
   1   2  -6 4844.71  771.45
  -1   2   6 4533.44  368.44
   1  -2  -6 5291.95  415.03
  -1  -2   6 4756.55  335.61
  -1   2   6 5682.83 2030.87
   1  -2  -6 4630.10 1549.14
   1   2  -6 3959.39  448.05
  -1  -2   6 5442.95  703.20
   1   2  -6 5446.70 1750.92
  -1  -2   6 4992.78  421.99
   1  -2  -6 5452.65 1518.20
  -1   2   6 5266.45  415.52
   1  -2  -516996.39  671.59
  -1  -2   519119.92 1046.80
   1   2  -517620.26  817.72
   1  -2  -517825.70  770.96
  -1   2   517171.18 1195.25
   1  -2  -517866.83 1203.94
  -1  -2   520324.57  940.83
   1   2  -518259.93  870.47
  -1   2   519927.59 1127.38
   1  -2  -518495.66  995.51
   1   2  -520202.19 1751.94
  -1  -2   517388.90 1200.07
   1   2  -519150.23 1256.33
  -1  -2   517498.94  849.24
   1  -2  -518279.22  883.74
  -1   2   516495.97 1305.97
   1  -2  -4117203.2 2050.84
  -1  -2   4120235.9 2522.89
   1   2  -4118741.7 2306.18
  -1   2   4120545.9 2646.83
   1  -2  -4127062.5 2743.26
   1  -2  -4121740.1 2375.88
   1   2  -4121843.8 2794.64
  -1  -2   4119582.0 2202.41
   1   2  -4117442.6 2338.36
  -1  -2   4120638.5 2523.17
   1  -2  -4122715.8 2373.78
  -1   2   4114869.5 2520.90
   1   2  -3159365.3 2888.53
   1  -2  -3163699.2 3025.40
  -1  -2   3164008.5 3079.96
   1  -2  -298314.95 1779.85
  -1  -2   293562.94 1730.14
   1  -2  -295615.74 1814.93
  -1  -2   294387.98 1840.85
   1  -2  -114616.32  573.07
   1  -2  -113482.69  656.61
   1   2  -113418.22  499.65
   1  -2  -115002.02  590.41
  -1  -2   113846.56  618.77
   1  -2  -114056.40  853.54
  -1  -2   113120.03  666.72
   1   2   082125.51 1555.50
  -1   2   083891.55 1576.60
  -1  -2   081393.86 1607.21
   1  -2   081391.23 1506.90
   1  -2   1 5227.89 1729.55
   1   2   1 4666.15 1353.32
  -1   2  -1 3571.09  368.81
  -1  -2  -1 3901.12  277.08
  -1  -2  -1 3918.91  410.74
  -1  -2  -1 4663.88 1095.80
   1  -2   1 4493.94  281.03
   1  -2   239324.69 1689.65
   1   2   240080.30 1561.22
  -1  -2  -236829.58 1278.09
  -1   2  -236543.40 1300.07
  -1  -2  -238762.90 1819.30
  -1  -2  -238369.55 1502.62
   1  -2   237986.18 1698.40
  -1   2  -325002.98 3224.13
   1  -2   326403.17 1288.06
  -1  -2  -323202.39  943.94
   1   2   323442.95 1186.26
   1   2   326627.43 1113.97
  -1  -2  -325748.03 1020.21
  -1   2  -326534.12 1405.77
  -1  -2  -326747.66 2318.95
  -1   2  -325843.26 1230.88
   1  -2   324986.61 1202.49
  -1  -2  -322209.80  936.37
   1   2   325680.26 1306.57
  -1  -2  -4231785.0 4177.93
  -1   2  -5 1418.23  231.58
   1  -2   5 1263.15  552.36
  -1  -2  -5 1030.49  363.82
   1   2   5  912.90  290.88
   1   2   5 1789.54  561.42
  -1  -2  -5 1780.78  467.58
   1  -2   5  874.43  476.57
  -1   2  -5 1577.28  509.57
   1  -2   5 1464.88  328.75
  -1   2  -5  862.22  385.16
   1   2   5 1469.71  866.26
  -1  -2  -5 1473.88  796.06
  -1   2  -5 1608.05  556.04
   1  -2   5 1753.98  546.85
  -1  -2  -5 1173.29  569.71
   1   2   5 1824.65  761.13
  -1   2  -682293.20 1775.42
   1  -2   685229.78 1815.78
  -1  -2  -686036.83 1776.64
   1   2   682614.92 1530.64
   1  -2   684366.41 1565.03
  -1   2  -681796.49 1549.82
   1  -2   683596.10 1484.07
  -1   2  -682797.37 1519.71
   1   2   679512.14 1811.18
  -1  -2  -682127.37 1654.29
  -1   2  -684591.71 1691.75
   1  -2   684711.81 1655.41
   1   2   684357.50 1822.28
  -1   2  -7 5000.57 1236.00
   1  -2   7 4197.55  574.42
  -1  -2  -7 5090.89  368.64
   1   2   7 4926.87  500.59
   1   2   7 5491.34  588.86
   1  -2   7 4532.65  482.53
  -1  -2  -7 5486.13  391.44
  -1   2  -7 4904.34  367.31
   1  -2   7 2809.08 1036.98
  -1   2  -7 5206.20  370.93
   1   2   7 4164.20 1824.48
  -1  -2  -7 5646.42  525.15
  -1   2  -7 5998.39  483.80
   1  -2   7 4138.30  431.86
  -1  -2  -7 5018.27  803.13
   1   2   7 4797.32  694.84
  -1   2  -8 3448.78 1327.22
   1  -2   8 3388.48  376.69
  -1  -2  -8 2895.20  443.09
   1   2   8 3107.46  268.67
   1   2   8 2967.03  216.78
   1  -2   8 2638.89  270.00
  -1  -2  -8 3038.31  588.52
  -1   2  -8 2467.66  272.73
   1  -2   8 2760.63  342.37
   1   2   8 2886.42 1024.38
  -1   2  -8 3032.22  831.91
  -1  -2  -8 3441.78  944.54
  -1   2  -8 3889.69  803.92
   1  -2   8 3015.96  514.35
  -1  -2  -8 4077.51 1017.31
   1   2   8 3181.65  882.76
  -1   2  -9  305.59  265.34
   1  -2   9  365.24  201.31
  -1  -2  -9  277.01  187.03
   1   2   9  604.65  186.04
   1   2   9  231.31  136.03
   1  -2   9  441.72  181.87
  -1  -2  -9  233.38  138.77
  -1   2  -9  321.14  251.44
   1  -2   9  165.93   89.79
   1   2   9   -3.65  533.59
  -1   2  -9  308.61  223.61
  -1  -2  -9  387.84  384.92
  -1   2  -9  435.47  246.83
   1  -2   9  113.60  201.94
  -1  -2  -9 -131.28  368.92
   1   2   9  399.27  210.58
  -1   2 -1012135.87 1169.86
   1  -2  1012286.57  578.51
  -1  -2 -1011878.81  531.17
   1   2  1012643.72  553.19
   1   2  1012317.95  514.90
   1  -2  1014721.24 1143.39
  -1  -2 -1013191.16  623.31
   1  -2  1013319.11  812.82
   1   2  1014099.64  941.95
  -1   2 -1012553.38  639.98
  -1  -2 -1013594.56 1341.66
  -1   2 -1013829.41 1025.06
  -1  -2 -1013581.32  922.95
  -1   2 -11  707.09  441.42
   1  -2  11 1167.06  435.49
  -1  -2 -11  934.42  228.18
   1   2  11 1058.35  287.17
   1   2  11  728.80  190.80
   1  -2  11 1482.10  440.64
  -1  -2 -11  661.93  333.54
   1  -2  11 1113.29  332.40
   1   2  11 1134.72  645.51
  -1   2 -11 1049.93  180.90
  -1   2 -11 1002.74  469.31
  -1  -2 -11  395.35  337.54
  -1   2 -1218141.10 1587.92
   1  -2  1215658.40  697.33
  -1  -2 -1217429.92 1023.71
   1   2  1216057.62  647.44
   1   2  1217846.77 1168.90
   1  -2  1216993.54  725.65
   1  -2  1217173.47  801.45
   1   2  1219427.71 1189.33
  -1   2 -1214957.99  749.41
  -1   2 -1218060.10 1186.95
  -1  -2 -1218252.69 1314.98
  -1   2 -13 5875.94 1583.72
  -1  -2 -13 4134.91  674.93
   1  -2  13 4204.01  939.52
   1   2  13 4146.45  557.22
   1   2  13 4857.18  624.89
   1  -2  13 4536.84  361.67
   1  -2  13 4708.19 1020.28
   1   2  13 3650.25 2032.03
  -1   2 -13 4287.00 1092.18
  -1   2 -13 5077.21 1066.60
  -1  -2 -13 5370.97 1425.49
  -1   2 -1412740.36 2157.15
  -1  -2 -14 9779.86 1199.09
   1  -2  14 8673.02 1022.37
   1   2  14 9805.87  353.07
   1   2  14 9276.97  420.28
   1  -2  14 9202.55  733.43
   1  -2  14 9918.57  465.56
   1   2  1410994.26  871.07
  -1   2 -14 8123.75  856.24
  -1   2 -1410052.51 1861.45
  -1  -2 -14 9523.26 1122.21
  -1   2 -15  231.03  143.12
  -1  -2 -15  673.74  239.16
   1   2  15  338.33  315.26
   1   2  15 1230.66  317.78
   1  -2  15 1302.71  366.17
   1  -2  15  918.83  212.75
   1   2  15  489.64  347.73
  -1   2 -15 1009.63  431.92
  -1  -2 -15  310.67  321.17
  -1   2 -1638687.64 1513.24
  -1  -2 -1639073.88 1569.32
   1   2  1641134.01 1370.04
   1   2  1644895.58 1586.65
   1  -2  1642655.07 1657.95
   1  -2  1642767.98 1811.53
   1   2  1642826.46 3142.96
  -1   2 -1643794.81 2480.14
  -1  -2 -1643900.52 1607.09
  -1   2 -17  996.16  616.74
  -1  -2 -17 1264.49  255.48
   1   2  17  226.49  183.64
   1  -2  17 1376.35  499.89
   1  -2  17  324.62  177.82
   1   2  17  759.21  468.03
  -1   2 -17 1584.66  642.28
  -1  -2 -17 1054.71  448.80
  -1  -2 -18 2371.18  543.24
   1   2  18 1846.91  297.14
   1  -2  18 1400.22  415.76
   1   2  18 2703.33  724.58
   1  -2  18 3140.31  750.60
   1  -2  18 2091.22  445.89
   1   2  18 2027.29  747.10
  -1   2 -18 2159.59  666.25
  -1  -2 -18 1823.70  608.05
  -1  -2 -19  971.22  343.68
   1   2  19  808.93  278.29
   1  -2  19  601.73  760.45
   1   2  19  527.49  250.14
   1  -2  19 1070.89  346.46
   1  -2  19  572.05  228.44
   1   2  19  999.49  655.43
  -1   2 -19  926.15  481.73
  -1  -2 -19 1193.96  515.02
  -1  -2 -2039918.54 1301.91
   1   2  2040767.53 1357.37
   1  -2  2040659.97 1523.76
   1   2  2047082.09 1648.77
   1   2  2045324.80 2009.07
  -1  -2 -2040639.03 1495.69
  -1  -2 -21  943.61  297.86
   1   2  21  707.45  187.88
   1  -2  21  433.98  424.10
   1   2  21   59.38  487.34
   1  -2  21  447.25  358.00
   1   2  21  367.33  398.40
  -1   2 -21  669.18  319.28
  -1   2 -21 1570.93  833.83
  -1  -2 -21  389.37  329.00
   1  -2  22  279.66  334.61
   1   2  22  849.62  549.21
   1   2  22 1654.05  388.37
  -1   2 -22 1516.24  492.93
  -1   2 -22  512.00  389.72
  -1  -2 -22  585.49  454.18
   1  -2  23 2289.62  606.01
   1   2  23 2203.58  545.44
   1   2  23 4309.84 1269.50
   1   2  23 3369.65 1184.46
  -1   2 -23 3095.08  917.00
  -1   2 -23 1502.77  619.65
  -1  -2 -23 2685.82  992.75
   1  -2  24 9598.07 2057.82
   1   2  24 9059.80  921.06
   1  -2  2413125.76 1414.49
   1   2  2412398.59 1882.29
  -1   2 -2412086.72  596.91
  -1   2 -24 9278.38 2282.08
  -1  -2 -2412085.97 1145.72
   1  -2  2515868.02  998.90
   1   2  2516681.34 1366.84
   1  -2  2516179.27 1131.38
   1   2  2516953.13 2658.90
  -1   2 -2517976.70 1109.17
  -1   2 -2514850.97 3183.10
  -1  -2 -2517387.97 2316.07
   1  -2  26 3883.97  948.29
   1   2  26 6545.53 1631.03
   1  -2  26 5993.66 2260.10
   1   2  26 6934.41 1514.81
  -1   2 -26 4534.59 1351.26
  -1   2 -26 6015.53 1395.41
  -1  -2 -26 4638.46 1353.88
   1  -2  27 5918.77 1500.18
   1   2  27 6350.13 2137.81
   1  -2  27 5376.54 1541.98
   1   2  27 8853.89 1632.71
  -1   2 -27 5549.72 1668.34
  -1   2 -27 7495.64 1857.61
  -1  -2 -27 5663.85 2402.08
   1   2  28 1865.38 2230.86
   1  -2  28 2783.01  890.98
   1   2  28 3467.36 1255.54
  -1   2 -28 3084.23 1073.79
  -1   2 -28 2743.16 1035.91
  -1  -2 -28 3054.29  897.90
   1   2  29  459.23  396.34
   1  -2  29  -11.61  555.90
   1   2  29  594.15  287.75
  -1   2 -29  866.76  408.11
  -1   2 -29  347.62  625.84
  -1  -2 -29  408.90  610.65
   1   2  30 2221.53 1204.27
   1  -2  30 2613.24  854.45
   1   2  30 1838.50  503.58
  -1   2 -30 1887.13  915.97
  -1   2 -30 2017.25  852.41
  -1  -2 -30 1588.52 1417.06
   1   2  31  933.83  290.83
   1  -2  31 2314.03  880.92
   1   2  31 2091.22  748.14
  -1   2 -31 1352.20  755.13
  -1   2 -31  615.86  614.39
  -1  -2 -31 1028.98  494.15
   1   2  32  312.01  447.46
   1  -2  32  265.87  334.32
  -1   2 -32  381.44  397.89
  -1  -2 -32  285.18  339.03
  -1   2 -32  417.43  762.13
  -1  -2 -32 1037.51  795.11
   1   2  33 2131.87  964.69
   1  -2  33 1804.78 1271.71
  -1   2 -33  669.62  674.18
  -1  -2 -33 2073.40 1204.16
  -1   2 -33 2134.41  987.40
  -1  -2 -33 2546.97 1200.77
   1   2  34 1780.41 1087.63
   1  -2  34 1761.22  873.04
  -1   2 -34 1407.25  484.77
  -1  -2 -34 1911.83 1037.65
  -1   2 -34 1589.68  636.38
  -1  -2 -34 1173.25 1007.09
   1  -2  35 1009.77  497.96
   1   2  35  993.46  484.23
  -1  -2 -35  623.53  369.56
  -1   2 -35  -86.98  623.93
  -1  -2 -35  977.89  583.49
  -1  -2 -36   31.59  325.16
  -1  -2 -37   -3.00  364.59
   1  -3 -37  301.80  192.57
  -1   3  36  834.74  384.92
   1  -3 -36  275.62  361.64
  -1   3  35  185.02  442.44
   1   3 -35  206.88  511.47
   1  -3 -35  460.45  280.54
   1   3 -35  582.99  582.11
   1  -3 -35 1125.54  689.90
  -1   3  34   80.62  613.79
   1   3 -34 1252.92  677.52
   1  -3 -34  564.05  431.08
   1   3 -34  969.41  717.90
   1  -3 -34  675.35  465.03
  -1   3  33  737.42  649.82
  -1  -3  33  494.65  459.19
   1   3 -33  464.91  324.24
   1  -3 -33  537.68  655.79
   1   3 -33 1248.12 1022.10
   1  -3 -33  486.64  409.11
  -1   3  32 2603.90 1097.48
  -1  -3  32 2045.94  924.94
   1   3 -32 2128.61  722.66
   1  -3 -32 1946.71 1280.12
   1   3 -32 2708.62 1099.36
   1  -3 -32 2583.17 1120.10
  -1   3  31 1496.66  904.80
  -1  -3  31 2180.18 1447.12
   1   3 -31 1806.23  876.45
   1  -3 -31 3730.01 1489.42
   1   3 -31 1200.78  727.96
   1  -3 -31 1989.76  738.25
  -1   3  30  685.93  557.24
  -1  -3  30 -539.07  598.49
   1   3 -30  176.21  353.30
   1  -3 -30 -104.29  484.31
   1   3 -30  -27.84  317.88
   1  -3 -30 -179.50  537.61
  -1   3  29 -497.47  504.38
  -1  -3  29  356.36  405.29
   1   3 -29  495.77  273.30
   1  -3 -29  605.75  310.52
   1   3 -29  500.21  565.46
   1  -3 -29 -437.95  527.98
  -1  -3  28  558.03  485.94
  -1   3  28  795.02  888.82
  -1  -3  28  -33.92  497.77
  -1   3  28 1318.08  508.33
   1   3 -28 1043.26  646.99
   1   3 -28 1020.65  759.07
   1  -3 -28  642.93  324.99
  -1  -3  27 1132.55  589.48
  -1   3  27  488.56  546.99
  -1  -3  27  330.33  319.09
  -1   3  27 1549.83  741.93
   1   3 -27  435.25  267.27
   1   3 -27  372.99  561.47
   1  -3 -27 -734.16  480.84
  -1  -3  26  359.66  349.23
  -1   3  26  630.35  625.15
  -1  -3  26  111.66  481.12
  -1   3  26  475.81  492.37
   1   3 -26  508.58  468.09
   1   3 -26 -480.43  657.67
   1  -3 -26 1108.37  669.72
  -1  -3  25  376.17  181.43
  -1   3  25  685.04  545.84
  -1  -3  25  502.04  393.13
  -1   3  25 -244.24  464.84
   1   3 -25  274.79  256.08
   1   3 -25 -672.48  707.46
   1  -3 -25  458.11  435.23
  -1  -3  2416949.90 1148.16
  -1   3  2418440.10 1010.87
  -1  -3  2416936.30 1242.61
  -1   3  2417087.28 1135.24
   1   3 -2416599.59 1715.97
   1   3 -2414669.37 3730.67
   1  -3 -2417514.78 1021.29
  -1  -3  23 7156.25 1575.45
  -1   3  23 5489.42 2092.50
  -1  -3  23 8357.27 2300.59
  -1   3  23 8588.50 1526.26
   1   3 -23 7644.92 1858.93
   1   3 -23 7568.38 2302.42
   1  -3 -23 8423.80 2394.47
  -1  -3  22 8531.33 1524.78
  -1   3  22 8842.99  828.55
  -1  -3  22 8367.18  751.56
  -1   3  22 9916.23 2405.87
   1   3 -22 7992.67  712.64
   1   3 -22 7573.55 2012.23
   1  -3 -22 9571.14 1906.07
  -1  -3  21 6573.97 1724.60
  -1   3  21 6581.75 2682.05
  -1  -3  21 8180.92 1937.66
  -1   3  21 6974.84 1679.67
   1   3 -21 7179.35 1716.57
   1   3 -21 7290.81 1494.28
   1  -3 -21 7627.88 1960.02
  -1  -3  20 2520.10  921.48
  -1   3  20 2549.52  897.31
  -1  -3  20 4319.83  967.33
  -1   3  20 3631.10  705.64
   1   3 -20 2791.06  822.72
   1   3 -20 4243.17 1405.92
   1  -3 -20 2423.99  604.17
  -1  -3  19  845.08  543.64
  -1   3  19  430.44  295.91
  -1  -3  19 -108.75  465.66
  -1   3  19  603.46  359.54
   1   3 -19  -23.73  272.58
   1   3 -19 -127.28  713.94
   1  -3 -19  531.17  309.00
  -1  -3  1844564.38 1380.15
  -1   3  1844124.22 2518.43
  -1  -3  1849387.23 1480.26
  -1   3  1845774.96 2549.82
   1   3 -1846025.91 1825.31
   1   3 -1849640.33 2446.75
   1  -3 -1845720.74 1767.09
  -1  -3  17 8859.37  891.30
  -1   3  17 8648.56  722.94
  -1  -3  17 8432.95 1264.01
  -1   3  17 9405.56  899.15
   1   3 -17 8502.52 2093.85
   1   3 -1710375.48 2472.89
   1  -3 -17 9531.89 1147.14
  -1  -3  1615238.87 1476.20
  -1   3  1616174.45  902.69
  -1  -3  1617777.62  906.73
  -1   3  1618191.39 1719.88
   1   3 -1617433.67  850.12
   1   3 -1619729.21 2988.00
   1  -3 -1617021.36 1347.18
  -1  -3  15  633.58  423.30
  -1   3  15  360.91  416.74
  -1  -3  15  772.52  291.36
  -1   3  15  861.26  434.67
   1   3 -15  684.02  250.63
   1   3 -15 1030.11  607.30
   1  -3 -15  428.51  453.18
  -1  -3  1415609.09 1039.65
  -1  -3  1413821.55  607.98
  -1   3  1414034.29  589.44
  -1  -3  1413801.76  982.62
  -1   3  1415026.74 1198.11
   1   3 -1413985.01  534.63
   1   3 -1412307.49  908.53
   1  -3 -1417052.02  993.43
  -1  -3  13  282.80  149.01
  -1  -3  13  513.24  519.96
  -1   3  13  235.30  278.86
  -1  -3  13  707.31  462.89
   1   3 -13  148.87  189.24
  -1   3  13   53.66  443.75
   1   3 -13   22.65  351.42
   1   3 -13  248.55  300.29
   1  -3 -13 -441.78  432.57
  -1  -3  1269681.97 1527.25
  -1  -3  1265144.34 2149.14
  -1   3  1270825.63 1427.05
  -1  -3  1266751.60 1274.57
  -1   3  1269038.24 1462.95
   1   3 -1269268.21 1699.30
   1   3 -1267480.52 1983.87
   1  -3 -1266230.28 1342.20
  -1  -3  11 2761.17  499.52
  -1  -3  11 2167.58 1060.03
  -1   3  11 2924.99  833.70
  -1  -3  11 2917.17  699.78
   1  -3 -11 1953.99  516.69
   1   3 -11 1937.16  508.80
  -1   3  11 2639.54 1087.50
   1   3 -11 2723.38  674.04
   1   3 -11 2702.93  648.53
   1  -3 -11 3070.76  819.10
  -1   3  11 1879.18  509.63
  -1  -3  1054694.40 2276.18
  -1  -3  1055839.61 1160.68
  -1   3  1056603.41 1516.07
   1  -3 -1054435.20 2063.12
  -1  -3  1059399.07 1265.42
   1   3 -1058915.66 1038.23
   1   3 -1052160.39 1995.54
  -1   3  1050087.70 2302.90
   1   3 -1059846.88 1502.44
   1   3 -1057528.87 1519.97
  -1  -3  1052370.19 2053.78
   1  -3 -1056305.00  825.53
  -1   3  1051566.23 2050.84
   1  -3  -9  824.34  117.78
   1  -3  -9  659.42  110.90
  -1  -3   9  661.95  530.83
  -1   3   9 1009.29  257.93
  -1  -3   9  251.45  176.38
   1  -3  -9  690.37  194.70
   1   3  -9  865.51  197.10
  -1   3   9  777.28  281.55
   1  -3  -9  552.86  502.65
   1   3  -9  990.44  293.69
  -1  -3   9  740.27  181.02
   1   3  -9 1060.84  717.94
  -1  -3   9  780.09  340.45
   1  -3  -9  696.67  385.38
  -1   3   9  820.75  214.20
   1  -3  -811901.41  462.59
   1  -3  -812102.93  524.35
  -1  -3   812049.73  733.04
   1   3  -811334.20  569.92
  -1   3   811967.77  833.28
   1  -3  -811460.16  578.25
  -1  -3   812962.54  626.81
   1   3  -811102.49  464.13
  -1   3   813225.34  657.70
   1  -3  -811988.94 1633.78
   1   3  -811924.96  801.58
  -1  -3   810834.70  717.61
   1   3  -811600.86  887.31
  -1  -3   810475.14  566.95
   1  -3  -811367.74  630.86
  -1   3   810637.99  953.35
   1  -3  -7 2096.04  305.86
   1  -3  -7 1964.26  429.04
  -1  -3   7 2510.72  667.30
   1   3  -7 1841.32  571.08
  -1   3   7 1909.25  583.88
   1  -3  -7 1910.64  500.71
  -1  -3   7 2268.54  600.80
   1   3  -7 2300.18  555.86
  -1   3   7 1813.55  613.00
   1  -3  -7 1892.67  490.15
   1   3  -7 2800.71  616.75
  -1  -3   7 1882.22  506.83
   1   3  -7 2642.95  810.75
  -1  -3   7 2615.47  788.49
   1  -3  -7 1706.31  458.61
  -1   3   7 1775.53  636.44
   1  -3  -6 1921.00  421.34
   1  -3  -6 2019.79  405.58
  -1  -3   6 1533.15  595.38
   1   3  -6 1791.68  364.14
  -1   3   6 1248.15  291.24
   1  -3  -6 1602.87  355.39
  -1  -3   6 2319.77  709.69
   1   3  -6 1745.12  140.54
  -1   3   6  986.44  492.41
   1  -3  -6 1565.00  610.57
   1   3  -6 1590.03  375.02
  -1  -3   6 1451.92  394.24
   1   3  -6 1258.10  383.20
  -1  -3   6 1288.83  355.78
   1  -3  -6 1494.99  475.50
  -1   3   6 1545.52  272.70
   1  -3  -5  702.46  282.76
  -1  -3   5 1024.59  655.40
   1  -3  -5 1194.44  330.29
   1   3  -5 1311.58  482.83
  -1   3   5  679.03  451.09
  -1  -3   5 1505.14  442.01
   1   3  -5 1519.90  470.85
  -1   3   5 1033.18  777.55
   1  -3  -5 1015.61  333.52
   1   3  -5 1315.72  407.50
  -1  -3   5  925.15  238.07
   1  -3  -5  862.94  317.16
   1   3  -5 1487.77  378.04
   1  -3  -5 2033.73  439.22
  -1  -3   4196754.0 3552.49
   1   3  -4199802.8 3567.23
   1  -3  -4194917.5 3503.02
   1   3  -4206692.7 3754.66
  -1  -3   4195298.6 3529.74
   1  -3  -4208456.2 3706.35
   1  -3  -3 2650.24  891.44
  -1  -3   3 4655.35  755.64
   1   3  -3 5485.78 1389.42
   1  -3  -3 4701.43 1046.17
  -1   3   3 5067.08 1290.66
   1  -3  -3 4059.00  388.66
  -1  -3   3 4249.59  381.40
   1   3  -3 4453.42  263.74
  -1   3   3 4659.15 1169.10
   1  -3  -3 4201.48 1416.68
   1   3  -3 5055.97  684.95
  -1  -3   3 4849.82 1025.51
  -1   3   3 5621.93 1081.46
   1  -3  -3 4822.17 1356.03
   1   3  -3 5163.85  866.35
  -1  -3   3 4657.29 1201.44
  -1   3   1 2713.39  622.05
   1  -3  -1 1604.19  525.95
  -1  -3   1 2476.09  646.74
   1   3  -1 2052.50  613.31
   1  -3  -1 2391.95  424.95
  -1  -3   1 1909.36  299.15
   1   3  -1 2081.93  407.16
   1  -3  -1 1944.62  448.02
   1  -3  -1 2502.00  482.50
   1   3  -1 2306.66  863.31
  -1  -3   1 2028.11  478.98
  -1   3   1 1743.57  873.39
   1   3  -1  889.18  668.75
   1  -3  -1 1449.67  512.32
  -1  -3   1  486.58  876.72
  -1   3   050584.69 1823.93
   1  -3   054436.89 1270.29
  -1  -3   049617.38 2042.39
   1  -3   050098.79 1783.00
  -1   3   051077.09 1804.80
  -1   3   051032.18 1703.80
   1  -3   051854.95 1783.93
   1   3   053496.32 2323.55
  -1  -3   051466.84 2704.86
   1   3   049433.04 1934.96
  -1  -3   050481.18 1833.03
  -1   3   054016.26 1928.77
   1  -3   048512.73 2222.84
  -1   3  -1  430.87  380.36
   1  -3   1 1012.27  582.23
  -1  -3  -1 1036.32  449.71
   1   3   1  489.22  470.85
   1  -3   1   75.30  283.22
  -1   3  -1 1120.31  523.37
   1  -3   1  450.34  342.30
   1   3   1 1946.33 1087.36
  -1  -3  -1 1485.21  842.55
   1   3   1  432.03  590.76
  -1  -3  -1 1647.88  814.81
  -1   3  -1  620.39  596.27
   1  -3   1  694.07  432.77
  -1   3  -3 8201.24 3170.05
   1  -3   310545.35  672.94
  -1  -3  -312344.03  716.29
   1   3   313727.95  964.68
   1  -3   312482.56 1002.90
  -1  -3  -313645.47  550.43
  -1   3  -311012.83  691.13
   1   3   311393.03  965.00
  -1  -3  -314483.32  932.57
  -1  -3  -311896.94  793.45
  -1   3  -313391.04  823.06
   1  -3   314135.26 1455.82
  -1  -3  -3 9942.41  924.94
  -1   3  -4204645.1 4079.99
   1  -3   4207085.4 3731.46
   1   3   4204324.5 3600.57
   1   3   4213565.0 3876.28
  -1  -3  -4203049.8 3721.63
  -1  -3  -4210500.0 3804.75
  -1   3  -4208774.8 3775.74
   1  -3   4204586.0 3651.34
  -1  -3  -4197941.9 3560.07
   1  -3   5 8376.93 1070.38
  -1  -3  -5 8744.10  387.74
   1   3   5 8970.08  422.12
  -1  -3  -5 8887.30  413.32
   1  -3   5 8625.61  376.52
  -1   3  -5 9173.87  464.93
  -1   3  -5 9227.95  363.58
   1   3   5 8842.97  592.66
  -1  -3  -5 8578.58  474.92
  -1   3  -5 9316.93  545.82
  -1  -3  -5 8688.88  474.22
   1   3   5 9233.39  529.33
  -1   3  -6 -185.60  503.28
   1  -3   6  345.09  336.28
  -1  -3  -6   39.46  156.12
   1   3   6   54.31  159.92
   1   3   6    3.95   40.84
   1  -3   6 -312.86  313.93
  -1  -3  -6   49.19   43.50
  -1   3  -6  177.94  134.38
  -1   3  -6   52.03   47.30
   1   3   6  -91.35  482.21
  -1  -3  -6 -228.83  392.81
  -1   3  -6   84.39   56.05
  -1   3  -6 -184.43  391.45
   1  -3   6  -28.89  260.92
  -1  -3  -6  133.27  377.60
   1   3   6  228.32  192.14
  -1   3  -7  283.95  423.24
   1  -3   7  430.03  183.61
  -1  -3  -7  472.11  229.89
   1   3   7  779.31  306.14
   1   3   7  107.89  128.85
   1  -3   7  429.85  253.54
  -1  -3  -7  -12.77  137.31
  -1   3  -7  220.77  123.86
  -1   3  -7  170.00   81.22
   1   3   7  218.03  381.67
  -1  -3  -7  156.22  226.87
  -1   3  -7  154.60   74.22
  -1   3  -7  345.76  339.60
   1  -3   7  413.86  160.17
  -1  -3  -7  306.41  265.25
   1   3   7   98.52  312.98
  -1   3  -829179.87 1548.33
   1  -3   829867.74 1210.75
  -1  -3  -829143.03 1000.21
   1   3   829568.08 1082.38
   1   3   830050.55 1014.51
   1  -3   829386.78 1068.06
  -1  -3  -830819.43 1039.74
  -1   3  -828616.62 1088.25
  -1   3  -828813.60 1059.43
   1   3   830010.07 1362.79
  -1  -3  -830593.19 1246.05
  -1   3  -829670.90  984.13
  -1   3  -828409.10 1281.59
   1  -3   830507.67 1121.99
  -1  -3  -831925.86 1229.95
   1   3   827561.27 1217.93
  -1   3  -9 1514.13  446.86
   1  -3   9 1819.14  611.09
  -1  -3  -9 2462.93  596.11
   1   3   9 2088.34  410.33
   1   3   9 2974.04  564.29
   1  -3   9 2481.03  673.91
  -1  -3  -9 1700.47  227.33
  -1   3  -9 2337.31  558.88
  -1   3  -9 2177.02  654.33
   1   3   9 2319.00  953.18
  -1  -3  -9 2106.76  832.19
  -1   3  -9 2150.45  418.91
  -1   3  -9 1919.59  955.17
   1  -3   9 1746.63  523.16
  -1  -3  -9 2743.16  734.27
  -1   3 -1076644.01 1762.75
   1  -3  1081084.32 1883.87
  -1  -3 -1082244.17 1381.35
   1   3  1077820.09 1353.72
   1   3  1080483.69 1355.48
   1  -3  1083758.63 1494.02
  -1  -3 -1080111.10 1454.77
   1   3  1077982.04 1722.20
  -1   3 -1079020.01 1407.95
  -1   3 -1076811.58 1363.25
  -1   3 -1085182.98 1795.23
  -1  -3 -1080978.80 2211.09
   1  -3  11 1479.87  384.48
  -1  -3 -11 1601.82  377.83
   1   3  11 1108.48  224.09
   1   3  11 1983.29  565.08
   1  -3  11 2282.08  561.75
  -1  -3 -11 1244.93  300.35
  -1   3 -11 1480.76  365.00
   1   3  11 1287.86  660.67
  -1   3 -11 1593.35  319.36
  -1   3 -11 1919.75  468.61
  -1  -3 -11 2033.17  592.84
  -1   3 -12 3257.29 1196.93
  -1  -3 -12 3494.11  297.46
   1   3  12 3326.50  598.05
   1   3  12 3169.10  647.50
   1  -3  12 4443.96 1076.62
  -1  -3 -12 2639.77  579.29
  -1   3 -12 3124.30  695.92
   1   3  12 3475.73 1156.57
  -1   3 -12 2996.88  682.85
  -1   3 -12 2162.21 1142.56
  -1  -3 -12 3232.18 1102.69
  -1   3 -13 3041.48  824.82
  -1  -3 -13 2519.37  541.05
   1   3  13 2538.11  559.14
   1   3  13 2195.12  528.96
   1  -3  13 3210.00  660.84
   1   3  13  896.11  913.92
  -1   3 -13 1416.23  294.00
  -1   3 -13 2516.05  578.71
  -1   3 -13 3782.34 1334.05
  -1  -3 -13 2405.16  566.91
  -1   3 -14  -26.11  423.70
  -1  -3 -14  554.86  243.62
   1   3  14 1018.87  225.91
   1   3  14  867.81  381.19
   1  -3  14 1344.30  323.77
   1   3  14  906.21  591.98
  -1   3 -14  890.40  224.02
  -1   3 -14 1206.19  241.28
  -1   3 -14  672.27  355.74
  -1  -3 -14 1449.07  414.00
  -1  -3 -15  -21.55  140.62
   1   3  15  -71.57  145.36
   1   3  15  157.66  119.13
   1  -3  15  -37.09  319.75
   1   3  15 -107.63  636.22
  -1   3 -15 -109.30  212.79
  -1   3 -15  332.88  175.69
  -1   3 -15 -149.91  547.84
  -1  -3 -15  163.13  250.96
  -1  -3 -16  748.32  239.50
   1   3  16  995.80  259.95
   1  -3  16  987.67  195.22
   1   3  16  613.07  246.25
   1  -3  16 1170.13  228.82
   1   3  16   58.29  435.48
  -1   3 -16  791.00  280.08
  -1   3 -16 1334.91  501.95
  -1  -3 -16 1717.69  437.76
  -1  -3 -17  120.50   92.09
   1   3  17   65.63  102.35
   1  -3  17  352.39  180.04
   1   3  17  388.64  165.00
   1  -3  17  141.78  212.47
   1   3  17 -234.54  658.82
  -1   3 -17  214.86  176.42
  -1   3 -17  -84.62  577.72
  -1  -3 -17  360.16  313.54
  -1  -3 -18 6217.47  727.83
   1   3  18 5602.79  336.78
   1  -3  18 6982.98 1571.85
   1   3  18 7571.63 1006.74
   1  -3  18 7596.15  845.31
   1   3  18 5806.47 2380.69
  -1   3 -18 6197.00  639.36
  -1   3 -18 6722.79 1563.86
  -1  -3 -18 8020.09 1535.75
  -1  -3 -19 1873.24  557.28
   1   3  19 2055.28  526.24
   1  -3  19 2391.42  755.50
   1   3  19 2840.92  670.56
   1  -3  19 2838.94 1008.16
   1   3  19 2953.73  687.45
  -1   3 -19 2570.11  704.72
  -1   3 -19 2241.08 1637.72
  -1  -3 -19 3059.28  757.94
  -1  -3 -20  571.93  308.58
   1   3  20  429.48  169.59
   1  -3  20  727.44  555.66
   1   3  20 1464.97  436.63
   1  -3  20  797.38  292.49
   1   3  20 1017.23  536.21
  -1   3 -20  681.91  368.14
  -1   3 -20  556.61  568.61
  -1  -3 -20 1062.60  456.83
  -1  -3 -21 2000.02  482.42
   1   3  21 1493.58  411.73
   1  -3  21 2043.84  645.75
   1   3  21 2223.43  566.56
   1  -3  21 1985.46  443.85
   1   3  21 2331.14  861.37
  -1   3 -21 1831.50  547.92
  -1   3 -21 1214.71  890.77
  -1  -3 -21 1741.63  561.97
   1  -3  2234977.60 1506.30
   1   3  2233082.19 2540.04
   1  -3  2232066.23 1942.60
   1   3  2237519.26 2940.04
  -1   3 -2234520.98 1867.61
  -1   3 -2236599.68 2006.41
  -1  -3 -2234812.35 1485.81
   1  -3  23 7824.27  964.16
   1   3  23 7948.14  871.43
   1   3  23 8234.56  657.52
   1  -3  23 9132.98  883.48
   1   3  23 9715.24 1686.73
  -1   3 -23 9426.51  587.54
  -1   3 -23 8131.78 1064.17
  -1  -3 -2310319.80  971.21
   1  -3  24 6806.90 1591.66
   1   3  24 6164.88 1939.39
   1  -3  24 7180.33 1632.24
   1   3  24 6301.14 1429.34
  -1   3 -24 6428.01  653.60
  -1   3 -24 7919.71 1566.76
  -1  -3 -24 8767.79 1660.06
   1  -3  25 1302.31  434.84
   1   3  25 1260.27  534.14
   1  -3  25 1422.57  488.40
   1   3  25 1325.07  566.36
  -1   3 -25  251.33  307.74
  -1   3 -25 1713.43  952.46
  -1  -3 -25  992.81  361.06
   1  -3  26  491.12  313.51
   1   3  26  682.92  294.48
   1  -3  26  457.92  283.62
   1   3  26 -397.06  496.51
  -1   3 -26  314.58  253.26
  -1   3 -26  427.69  318.02
  -1  -3 -26 1241.63  624.14
   1  -3  27 1474.83  934.43
   1   3  27 1252.47  704.81
   1  -3  27 2195.06  891.49
   1   3  27 2308.92  616.00
  -1   3 -27 1578.05  654.30
  -1   3 -27 1793.58  827.75
  -1  -3 -27 2521.40  701.02
   1  -3  28 -214.16  315.20
   1   3  28  195.87  321.88
   1  -3  28 -214.02  481.72
   1   3  28  362.83  377.60
  -1   3 -28  426.05  293.53
  -1   3 -28  730.59  888.97
  -1  -3 -28  820.41  672.06
   1   3  29  880.40  412.47
   1   3  29  815.53  307.90
  -1   3 -29 1196.18  548.27
  -1   3 -29 1257.11  832.28
  -1  -3 -29 2964.50  969.68
   1   3  30  764.68  516.37
   1   3  30 1346.26  425.25
  -1   3 -30 1571.68  489.90
  -1   3 -30 1519.38 1044.43
  -1  -3 -30  549.36  521.43
   1   3  31  820.45  666.96
   1   3  31 1837.85  760.63
  -1   3 -31  769.47  257.15
  -1   3 -31  975.31  524.84
  -1  -3 -31  892.97  387.37
   1   3  3211212.62  929.52
   1  -3  3212538.10 1125.81
   1   3  3211527.78 1028.46
  -1   3 -3212214.18  772.87
  -1   3 -32 7862.57 3824.78
  -1  -3 -32 8230.68 3332.79
   1   3  33 1430.19  591.11
   1  -3  33  551.76  662.40
  -1   3 -33 1336.95 1052.53
  -1  -3 -33 2436.46  818.75
   1   3  34 5579.12 3455.61
   1  -3  34 7689.76 2230.44
  -1  -3 -3413653.94 2400.40
  -1   3 -34 5716.09 3402.54
  -1  -3 -3410524.44 2946.12
   1   3  35 1122.05  605.42
  -1  -3 -35  578.72  922.95
  -1  -3 -35 1341.09  648.11
   1   3  36 -288.99  576.52
  -1  -3 -36  179.19  368.37
  -1   4  36 1594.27 1208.08
   1  -4 -36 1917.35  713.61
  -1   4  35  417.02  454.64
  -1  -4  35  483.42  643.05
   1  -4 -35  243.98  526.60
   1   4 -35 1497.47  996.22
   1  -4 -35  286.95  435.37
  -1   4  34 1523.69  679.19
  -1  -4  34  650.91  405.09
   1  -4 -34  613.43  533.40
   1   4 -34  746.87  799.17
   1  -4 -34  349.13 1014.10
  -1   4  33  784.28  436.76
  -1  -4  33  326.39  476.95
   1   4 -33  518.90  458.01
   1  -4 -33  485.94  338.64
   1   4 -33   92.76  615.98
   1  -4 -33  597.30  768.09
  -1   4  32 -528.16  705.62
  -1  -4  32  579.25  891.58
   1   4 -32  890.93  822.52
   1  -4 -32  857.46  444.63
   1   4 -32  351.85  619.59
   1  -4 -32  270.90  602.15
  -1   4  31 -235.32  608.42
  -1  -4  31  388.51  865.65
   1   4 -31  374.70  287.41
   1  -4 -31  296.73  359.14
   1   4 -31  972.51  562.16
   1  -4 -31 1095.85  623.75
  -1   4  30 2151.55 1025.72
  -1  -4  30  299.53  474.21
   1   4 -30  508.49  591.08
   1   4 -30  534.31  423.75
   1  -4 -30  -75.20  464.93
  -1   4  29  994.99  575.34
  -1  -4  29  873.36  598.15
  -1   4  29  338.72  391.99
   1   4 -29  401.68  607.09
   1   4 -29  462.71  658.13
   1  -4 -29  807.05  415.12
  -1  -4  28  -69.00  234.75
  -1   4  28  215.89  414.81
  -1  -4  28 -229.22  535.75
  -1   4  28  870.87  567.53
   1   4 -28  493.06  367.48
   1   4 -28  617.72  496.95
   1  -4 -28  385.80  458.01
  -1  -4  27  610.52  329.14
  -1   4  27  616.55  395.91
  -1  -4  27  362.30  457.34
  -1   4  27  312.85  302.94
   1   4 -27  860.43  637.07
   1   4 -27  158.21  550.11
   1  -4 -27 -191.89  506.44
  -1  -4  26 3376.83 1292.24
  -1   4  26 4019.07 1229.79
  -1  -4  26 5157.28 1495.89
  -1   4  26 6823.01 1381.31
   1   4 -26 5103.09 1852.82
   1   4 -26 5350.78 2252.03
   1  -4 -26 6177.83 1244.15
  -1  -4  25   95.50  266.07
  -1   4  25  -70.29  557.00
  -1  -4  25 -995.54  516.16
  -1   4  25  200.92  219.01
   1   4 -25  361.76  250.73
   1   4 -25  908.50  798.38
   1  -4 -25 -273.77  477.02
  -1  -4  2431517.99 1658.50
  -1   4  2429788.76 1596.42
  -1  -4  2430214.09 1644.98
  -1   4  2427434.72 1822.79
   1   4 -2430701.33 1565.23
   1   4 -2430846.15 3262.68
   1  -4 -2429080.45 1576.81
  -1  -4  23 7951.91 1241.64
  -1   4  23 8371.09  770.47
  -1  -4  23 9453.31 1219.38
  -1   4  23 9070.30 2066.86
   1   4 -23 9765.42 2253.79
   1   4 -23 9165.39 3277.72
   1  -4 -23 8920.68 2527.21
  -1  -4  2241619.34 2021.35
  -1   4  2243306.52 1691.22
  -1  -4  2237113.72 1620.29
  -1   4  2236237.39 2490.61
   1   4 -2241889.99 2557.31
   1   4 -2242100.65 4120.66
  -1  -4  21 9641.83  854.52
  -1   4  2110186.11 1072.80
  -1  -4  2110725.43 1158.89
  -1   4  21 9992.50 1919.74
   1   4 -21 9667.38 1245.01
   1   4 -2110112.49 2563.72
   1  -4 -2110845.77 1122.34
  -1  -4  2030925.77 1279.88
  -1   4  2032096.84 1684.26
  -1  -4  2030572.30 1555.53
  -1   4  2033263.49 1392.37
   1   4 -2029840.82  849.09
   1   4 -2031736.19 2964.18
   1  -4 -2032942.76 1522.29
  -1  -4  19 1936.33  628.54
  -1   4  19 1911.69  766.33
  -1  -4  19 2096.94  509.25
  -1   4  19 2578.78  829.41
   1   4 -19 2454.44  522.40
   1   4 -19 1858.83 1027.99
   1  -4 -19 2538.04  888.24
  -1  -4  18  582.30  301.36
  -1   4  18  364.34  343.39
  -1  -4  18  233.39  304.75
  -1   4  18  781.46  572.89
   1   4 -18  461.76  186.30
   1   4 -18  495.15  759.40
   1  -4 -18   90.77  337.27
  -1  -4  17  427.15  269.43
  -1   4  17  120.17  310.27
  -1  -4  17  381.94  246.88
  -1   4  17  229.58  391.98
   1   4 -17  751.14  420.90
   1   4 -17  615.20  538.00
   1  -4 -17  144.94  391.74
  -1  -4  16 -177.68  366.00
  -1   4  16  328.28  414.74
  -1  -4  16 -139.41  359.21
  -1   4  16   56.06  348.32
   1   4 -16   84.46  247.04
   1   4 -16 -583.94  661.61
   1  -4 -16  826.27  557.01
  -1  -4  15 2483.50  947.78
  -1   4  15 1844.57  366.55
  -1  -4  15 2293.34  613.96
  -1   4  15 2506.18  775.27
   1   4 -15 2676.79  479.95
   1   4 -15 1916.04  652.63
   1  -4 -15 1900.68  527.37
  -1  -4  14 6359.36  696.40
  -1   4  14 8238.69 1422.34
  -1  -4  14 8040.86  745.84
   1   4 -14 6837.07  697.05
  -1   4  14 6763.93 2134.14
   1   4 -14 6912.87  704.39
   1   4 -14 8134.66 2242.61
   1  -4 -14 9284.77 1773.11
  -1  -4  13   -7.57  404.61
  -1   4  13  -56.92  379.37
  -1  -4  13  360.44  336.71
   1   4 -13  278.75  164.21
  -1   4  13 -140.72  532.67
   1   4 -13 -130.12  314.20
   1   4 -13  598.64 1018.06
   1  -4 -13  120.40  269.77
  -1  -4  12  293.37  315.02
  -1   4  12  603.90  385.28
  -1  -4  12  -43.04  316.45
   1  -4 -12  380.17  105.88
   1   4 -12 -135.47  149.66
  -1   4  12  319.29  374.75
   1   4 -12  -23.82  317.44
   1   4 -12 1061.04  973.03
   1  -4 -12  251.93  224.90
  -1  -4  11 2685.47  586.41
   1  -4 -11 2618.23  250.95
   1  -4 -11 2683.90  261.03
  -1  -4  11 2163.35 1639.37
  -1   4  11 2952.35  570.27
   1  -4 -11 2579.88  243.54
  -1  -4  11 3119.04  773.07
  -1   4  11 3379.34  907.50
   1   4 -11 3069.44 1102.15
  -1  -4  11 2514.51  615.14
   1   4 -11 3665.37 1151.19
   1  -4 -11 2794.43  730.75
  -1  -4  10 1648.52  321.62
   1  -4 -10 1876.21  516.31
   1  -4 -10 1649.91  294.74
  -1  -4  10 1677.81  827.42
  -1   4  10 2025.94  410.68
  -1  -4  10 2165.13  591.46
   1  -4 -10 1617.79  393.12
  -1   4  10 2320.08  842.04
   1   4 -10 1594.32 1202.24
  -1  -4  10 1688.78  455.53
   1   4 -10   37.59  633.51
   1  -4 -10 1568.81  681.66
   1  -4  -9 7120.79  362.97
   1  -4  -9 7327.00  530.60
  -1  -4   9 8318.64 1406.20
   1   4  -9 7161.29  912.03
  -1   4   9 7285.75  430.05
   1  -4  -9 7039.14  478.05
  -1  -4   9 7372.52  718.78
   1   4  -9 7217.17  289.76
  -1   4   9 7467.14 2771.31
   1   4  -9 8093.47  566.65
  -1  -4   9 7166.77  802.35
   1   4  -9 8080.46 1240.20
   1  -4  -9 8134.40 1259.04
  -1   4   9 7372.05  911.75
   1  -4  -8  205.85  178.66
   1  -4  -8  237.01   72.34
  -1  -4   8  404.26  434.92
   1   4  -8  101.85  203.53
  -1   4   8  202.26  226.78
   1  -4  -8  173.96  126.55
  -1  -4   8 -109.34  244.09
   1   4  -8  116.88   76.35
  -1   4   8  479.86  316.97
   1  -4  -8  105.80  218.83
   1   4  -8  210.07  184.68
  -1  -4   8  132.48  229.55
   1   4  -8  789.32  501.23
  -1  -4   8  227.81  223.89
   1  -4  -8  506.53  417.32
  -1   4   8   83.55  106.04
   1  -4  -725459.29 1004.12
   1  -4  -727288.64 1159.44
  -1  -4   728871.33 1192.06
   1   4  -725902.37 1125.90
  -1   4   726381.16 1013.69
   1  -4  -726289.99 1022.04
  -1  -4   728330.41  959.16
   1   4  -724769.82  826.29
   1  -4  -727163.05 1117.36
   1   4  -727039.87 1022.81
  -1  -4   726033.94  968.11
   1  -4  -725205.39 1067.65
   1   4  -727681.28 1247.26
  -1  -4   723642.88 1008.62
   1  -4  -724197.15 1660.85
   1  -4  -621784.54  837.97
   1  -4  -621726.39  917.47
  -1  -4   622016.14  990.46
   1   4  -621308.07 1146.02
  -1   4   621850.19  979.08
   1  -4  -622450.64  397.53
  -1  -4   624109.23  814.13
   1   4  -621651.14  770.82
  -1   4   623641.63  996.43
   1  -4  -621922.70  938.68
   1   4  -621418.29  923.92
  -1  -4   620543.25  829.24
   1  -4  -621576.39 1093.96
   1   4  -622141.78  782.23
  -1  -4   622498.64  632.59
   1  -4  -622323.45  619.80
   1  -4  -5  -58.09  175.82
  -1  -4   5   91.47  420.37
   1  -4  -5   86.27  143.70
   1   4  -5  159.91  205.79
  -1   4   5  -61.80  226.86
   1  -4  -5    7.01  114.42
  -1  -4   5 -133.05  134.36
   1   4  -5  214.42   96.10
  -1   4   5  238.71  238.70
   1  -4  -5  183.38  135.11
   1   4  -5  111.65  144.61
  -1  -4   5  239.41  168.41
   1  -4  -5  540.80  363.39
   1   4  -5 -127.20  527.72
  -1  -4   5 -262.74  357.78
   1  -4  -5 -310.78  363.55
   1  -4  -4 1116.92  214.61
  -1  -4   4 1096.22  371.01
   1  -4  -4 1019.82  210.03
   1   4  -4  886.76  416.33
  -1   4   4  958.07  280.97
   1  -4  -4 1428.45  322.84
  -1  -4   4 1508.79  327.57
   1   4  -4 1241.93  342.64
  -1   4   4 1743.05  441.66
   1  -4  -4 1139.91  298.99
   1   4  -4  484.99  290.65
  -1  -4   4  557.11  155.35
  -1   4   4  761.65  472.26
   1  -4  -4  950.93  235.35
   1   4  -4  513.95  254.00
  -1  -4   4 1044.22  443.75
   1  -4  -3 3959.52  352.16
  -1  -4   3 5161.17 1399.11
   1   4  -3 3177.30 1229.58
   1  -4  -3 4678.90 1185.82
  -1   4   3 3501.36  304.84
   1  -4  -3 3589.91  411.99
  -1  -4   3 3915.56  398.26
   1   4  -3 3674.68  146.80
  -1   4   3 4251.87 1261.89
   1  -4  -3 4585.17  514.98
   1   4  -3 5344.34 1449.66
  -1  -4   3 4014.94  330.40
  -1   4   3 3327.00 1485.16
   1  -4  -3 2884.71  354.06
   1   4  -3 4357.29 1931.02
  -1  -4   3 4495.75  765.54
   1  -4  -253379.73 1827.63
   1   4  -250757.47 1753.90
   1  -4  -251171.72 1736.88
   1  -4  -252830.20 1780.16
  -1   4   252203.93 1734.66
   1  -4  -253426.13 1774.68
   1   4  -254026.87 1853.77
  -1  -4   248464.03 1668.52
  -1   4   251400.17 1941.08
   1  -4  -248938.07 1881.07
   1   4  -250406.07 1835.44
  -1  -4   249758.61 1805.06
   1  -4  -125640.79 1024.21
  -1  -4   122274.05  720.84
   1   4  -120660.03 1184.16
   1  -4  -124932.82  978.60
   1  -4  -122312.95  507.43
  -1  -4   122741.36  412.72
   1   4  -124272.01  824.53
   1  -4  -122405.78  567.79
  -1   4   123202.49 1032.86
   1  -4  -122595.48  466.77
   1   4  -121413.04 1105.80
  -1  -4   121358.73 1596.06
  -1   4   121453.56 1280.80
   1   4  -123340.93 1159.35
  -1  -4   122166.37  924.02
   1  -4  -120802.50 1562.25
   1  -4   052797.10 1823.50
   1   4   048667.33 1666.11
   1  -4   052364.03 1808.40
  -1  -4   052703.90 1665.27
   1   4   053244.79 1691.61
   1  -4   050894.41 1734.25
  -1   4   051802.23 1811.32
  -1   4   052434.57 1717.17
   1  -4   053417.50 1751.70
   1   4   055000.33 2126.23
   1   4   053677.35 2718.59
  -1   4   051503.34 2179.57
   1  -4   051483.86 2070.42
   1  -4   1 3138.57  671.86
  -1  -4  -1 2270.18  500.89
   1   4   1 2471.08  819.69
   1  -4   1 2338.44  559.82
   1  -4   1 2036.02  523.14
  -1   4  -1 2758.74  712.62
  -1   4  -1 2332.95  353.68
   1   4   1 3868.25 1265.63
   1  -4   1 2093.00  516.29
  -1  -4  -1 2081.55  729.13
   1   4   1 2694.99 1010.33
  -1  -4  -1 3126.83  841.47
  -1   4  -1 2581.18  775.58
   1  -4   1 2776.65  713.96
   1  -4   2 5290.23  388.94
  -1  -4  -2 6962.05 1348.61
   1   4   2 5850.71  395.95
   1  -4   2 5719.23  455.48
  -1   4  -2 4688.17  330.69
   1   4   2 5401.08 1752.49
  -1  -4  -2 4454.94  367.19
   1  -4   2 5632.59  323.81
   1   4   2 5498.05 1585.66
  -1  -4  -2 5525.30  494.88
  -1   4  -2 6119.16 1623.15
   1  -4   2 4473.04  354.85
  -1   4  -3  164.22  316.54
   1  -4   3  557.18  384.10
  -1  -4  -3  286.39  273.20
   1   4   3  655.33  430.75
  -1  -4  -3  205.84   65.64
   1  -4   3  372.87  211.17
  -1   4  -3  415.24  210.70
   1   4   3  373.35  411.52
  -1  -4  -3  312.09  216.88
   1  -4   3  471.56  100.67
   1   4   3  414.14  489.37
  -1  -4  -3  294.83  328.94
  -1   4  -3    2.34  508.07
   1  -4   3    1.91  218.47
  -1   4  -4 5376.69 1617.39
   1  -4   4 3637.21 1138.98
  -1  -4  -4 4510.32  897.74
   1   4   4 3385.39  278.40
   1   4   4 4501.47  335.71
  -1  -4  -4 4194.79  220.78
   1  -4   4 4701.11  509.95
  -1   4  -4 3816.52  375.46
   1   4   4 3929.77 1097.73
  -1  -4  -4 4383.79 1316.99
   1  -4   4 4296.91  223.83
  -1  -4  -4 3456.94  875.70
  -1   4  -4 4961.54 1431.25
   1  -4   4 4887.39 1106.43
  -1  -4  -4 4740.48 1531.83
  -1   4  -516582.11 1100.34
   1  -4   518035.46  854.36
  -1  -4  -516808.37  760.62
   1   4   516247.45  726.35
   1   4   516246.64  652.37
  -1  -4  -515942.77  597.32
   1  -4   516865.46  799.77
  -1   4  -515581.06  662.97
   1   4   516927.51 1008.82
  -1  -4  -516198.83  814.69
   1  -4   517788.10  631.46
  -1  -4  -516137.54 1355.29
  -1   4  -518084.95 1500.38
   1  -4   515455.10  704.87
  -1  -4  -517666.32 1836.96
  -1   4  -681260.83 1847.13
   1  -4   684042.65 1745.94
  -1  -4  -686061.14 1693.87
   1   4   685045.08 1634.27
   1   4   688606.41 1562.16
  -1  -4  -686578.30 1593.84
   1  -4   682444.08 2021.46
  -1   4  -684398.07 1631.52
  -1   4  -689219.83 1546.73
  -1  -4  -683034.41 1766.29
  -1   4  -683265.37 1789.36
   1  -4   682279.95 1661.97
  -1  -4  -687001.81 1784.62
  -1   4  -7 -471.06  592.52
   1  -4   7  747.72  303.50
  -1  -4  -7  669.69  427.02
   1   4   7  149.62  128.68
   1   4   7   80.43  141.34
   1  -4   7 -346.26  294.71
  -1  -4  -7   37.15   89.62
  -1   4  -7  138.08  245.07
  -1   4  -7  224.12   88.59
   1   4   7  -26.57  569.70
  -1  -4  -7   -3.45  347.64
  -1   4  -7  175.31  138.34
  -1   4  -7  144.49  380.60
   1  -4   7  149.27  255.45
  -1  -4  -7  -24.73  269.45
   1   4   7  109.23  238.70
  -1   4  -8  322.44  509.95
   1  -4   8  620.43  344.62
  -1  -4  -8  232.46  326.27
   1   4   8  127.55  132.27
   1   4   8  239.24   85.15
   1  -4   8 -275.83  328.52
  -1  -4  -8   58.66   86.26
  -1   4  -8  192.71  207.79
  -1   4  -8  144.84  120.77
   1   4   8  568.41  724.27
  -1   4  -8   65.81  115.11
  -1   4  -8 -371.88  550.85
  -1  -4  -8 1163.68  462.05
  -1   4  -9 1948.04  612.35
  -1  -4  -9 2539.85  447.63
   1   4   9 2206.01  720.14
   1   4   9 1869.70  383.80
   1  -4   9 1392.34  365.35
  -1  -4  -9 1746.60  501.45
  -1   4  -9 1430.20  399.09
   1   4   9 1346.67  627.26
  -1   4  -9 1456.67  372.69
  -1   4  -9 2085.41  700.22
  -1  -4  -9 1860.40  687.30
  -1   4 -10 8981.59  984.02
  -1  -4 -10 9880.50  741.89
   1   4  10 9523.50  471.13
   1   4  1010405.59  812.61
   1  -4  1011508.43 1743.05
  -1  -4 -10 9895.39  327.61
  -1   4 -10 8352.37  608.25
   1   4  10 9380.67  777.19
  -1   4 -10 8519.51  507.69
  -1  -4 -1010291.85 1021.87
  -1  -4 -11 6831.89  762.63
   1   4  11 6379.51  320.85
   1   4  11 7327.65  904.43
   1  -4  11 5907.30  512.11
  -1  -4 -11 5888.92  237.79
  -1   4 -11 6279.19  809.91
   1   4  11 6000.97 1486.45
  -1   4 -11 6252.34  831.49
  -1   4 -11 7162.69 1948.89
  -1  -4 -11 6717.82 1066.59
  -1  -4 -12  256.70  172.94
   1   4  12  453.18  261.61
   1  -4  12 -516.87  466.79
   1   4  12   78.96  208.00
   1  -4  12  460.23  287.35
  -1  -4 -12  220.59  146.26
  -1   4 -12  161.54  173.51
   1   4  12  280.56  388.66
  -1   4 -12  221.75  203.36
  -1   4 -12  315.09  607.11
  -1  -4 -12   41.02  261.35
  -1  -4 -13 1337.11  275.57
   1   4  13 1785.93  355.97
   1  -4  13 2224.54  528.50
   1   4  13 1486.24  360.18
   1  -4  13 1715.41  502.30
  -1   4 -13 1026.35  382.32
   1   4  13  736.77  962.84
  -1   4 -13 1272.79  327.19
  -1   4 -13  506.39  443.98
  -1  -4 -13 1623.10  463.09
  -1  -4 -14 1716.09  415.65
   1   4  14 1739.84  385.36
   1  -4  14 1396.98  508.66
   1   4  14 1949.29  538.36
   1  -4  14 1295.87  448.16
   1   4  14 1401.65  682.07
  -1   4 -14 1248.11  410.03
  -1   4 -14 1834.34  408.92
  -1   4 -14 1399.92  581.54
  -1  -4 -14 1600.00  542.18
  -1  -4 -15 1374.96  317.40
   1   4  15  857.93  187.99
   1  -4  15  769.58  526.94
   1   4  15 1410.74  275.66
   1  -4  15 1073.11  375.07
   1   4  15  795.23  445.43
  -1   4 -15  907.80  434.05
  -1   4 -15  722.95  222.54
  -1   4 -15 1400.56  660.33
  -1  -4 -15 1072.99  372.89
  -1  -4 -16 9792.88  505.32
   1   4  16 9290.26  614.45
   1  -4  1610957.72 2463.53
   1   4  1610124.93  482.87
   1  -4  1610461.74  736.96
   1   4  1612851.39 1067.94
  -1   4 -16 8223.01  915.61
  -1   4 -1610563.58  495.15
  -1   4 -1612936.42  939.56
  -1  -4 -1610654.20  897.01
  -1  -4 -17 3282.77  762.67
   1   4  17 2081.88  736.19
   1  -4  17 4082.63 1026.09
   1   4  17 3288.77  898.33
   1  -4  17 5098.11  852.85
   1   4  17 2669.90  809.11
  -1   4 -17 3619.37  819.33
  -1   4 -17 3834.15 1099.73
  -1  -4 -17 4591.77 1312.01
  -1  -4 -18 1192.32  399.41
   1   4  18  999.78  337.59
   1  -4  18  823.99  339.63
   1   4  18  746.68  217.04
   1  -4  18 1784.33  422.79
   1   4  18 1987.13  617.43
  -1   4 -18 1580.67  374.35
  -1   4 -18 1261.64  697.37
  -1  -4 -18 2191.79  527.46
  -1  -4 -19 3115.21  809.98
   1   4  19 3005.44  636.67
   1  -4  19 4576.36 1502.88
   1   4  19 3683.43 1087.46
   1  -4  19 3820.87  828.65
   1   4  19 3689.12  938.82
  -1   4 -19 3345.42  911.48
  -1   4 -19 3926.53  668.75
  -1  -4 -19 4625.59 1302.34
  -1  -4 -20 2058.05  494.07
   1   4  20  850.72  241.09
   1  -4  20 1381.97  485.39
   1   4  20 1513.55  500.58
   1  -4  20 1550.14  429.15
   1   4  20  800.37  659.64
  -1   4 -20 1187.93  433.35
  -1   4 -20 1168.68  440.63
  -1  -4 -20 1391.94  368.40
  -1  -4 -21 1957.52  464.07
   1  -4  21 1110.28  701.06
   1   4  21 2946.29  843.60
   1  -4  21 1908.14  564.35
   1   4  21 1016.42  391.19
  -1   4 -21 1187.41  711.30
  -1   4 -21 1218.16  473.19
  -1  -4 -21 2745.64  828.30
   1  -4  2270892.97 2861.38
   1   4  2272232.05 2585.35
   1  -4  2265928.59 2564.78
   1   4  2275544.66 2785.10
  -1   4 -2268826.66 2357.28
  -1   4 -2272107.65 2926.64
  -1  -4 -2277183.27 2812.94
   1  -4  23 1893.58  703.10
   1   4  23 2160.78  532.15
   1  -4  23 2822.54  584.25
   1   4  23 2260.06  575.49
  -1   4 -23 1440.96  500.33
  -1   4 -23 3876.20  911.41
  -1  -4 -23 1450.16  420.89
   1  -4  24  547.75  451.17
   1   4  24  144.41  257.81
   1  -4  24  -34.95  397.28
   1   4  24  -35.13  327.88
  -1   4 -24  476.75  253.88
  -1   4 -24  434.08  682.64
  -1  -4 -24   46.80  281.88
   1  -4  25 3190.05  868.16
   1   4  25 2206.91  765.00
   1  -4  25 3029.93 1499.87
   1   4  25 4007.29  777.85
  -1   4 -25 2899.53  834.75
  -1   4 -25 2899.44 1438.73
  -1  -4 -25 2792.74 1219.29
   1  -4  26 1424.30  674.68
   1   4  26 1168.81  291.44
   1  -4  26 1537.71  472.64
   1   4  26 2126.00  733.25
  -1   4 -26  504.23  273.97
  -1   4 -26  259.04  557.15
  -1  -4 -26  698.14  423.23
   1  -4  27  810.77  246.85
   1   4  27  668.17  365.19
   1  -4  27 1202.70  514.20
   1   4  27  609.43  478.49
  -1   4 -27  664.08  353.44
  -1   4 -27  464.21  438.35
  -1  -4 -27 -229.30  563.26
   1  -4  28 4418.79 1904.16
   1   4  28 7584.93 1058.29
   1  -4  28 8226.40 1149.72
   1   4  28 9542.64 1607.87
  -1   4 -28 5877.48 2020.87
  -1   4 -28 7239.58 2528.32
  -1  -4 -28 8117.04  982.06
   1   4  29  250.96  356.27
   1  -4  29  234.27  302.24
   1   4  29  263.47  289.48
  -1   4 -29  333.51  240.71
  -1   4 -29  674.68  761.17
   1   4  30 1244.06  432.61
   1   4  30 -548.70  477.55
  -1   4 -30 -238.34  314.14
  -1   4 -30 2149.19  794.36
  -1  -4 -30  705.35  266.57
   1   4  31  506.76  504.33
   1  -4  31  -46.38  539.55
   1   4  31  719.25  431.17
  -1   4 -31  196.71  211.37
  -1   4 -31  760.33 1094.34
  -1  -4 -31 -514.48  645.30
   1   4  32  333.29  404.58
   1  -4  32  606.51  563.62
   1   4  32  577.77  343.75
  -1   4 -32  920.30 1219.81
  -1  -4 -32 -597.45  761.91
   1   4  33  698.87  714.50
   1  -4  33 1207.81  712.09
   1   4  33  878.04  638.37
  -1   4 -33 1395.70 1169.31
  -1  -4 -33 1736.92  861.08
   1   4  34 1029.36  800.25
   1  -4  34  406.03  462.66
   1   4  34  420.45  265.06
  -1   4 -34  738.25  537.01
  -1  -4 -34  476.31  565.98
   1   4  35 1108.03  837.32
  -1  -4 -35  800.53  369.08
   1   4  36  590.63  648.84
  -1   5  36  502.91  695.65
   1  -5 -35 2763.64 1767.47
   1   5 -35 2182.05 1408.07
   1  -5 -35 2511.94 1051.71
  -1   5  34  323.36  647.53
  -1  -5  34  447.13  478.38
   1  -5 -34 1210.71  454.77
   1   5 -34  900.29  833.20
   1  -5 -34  706.92  695.57
  -1   5  33  913.15  657.84
  -1  -5  33 1112.23  985.95
   1  -5 -33 1329.44  765.50
   1   5 -33 1798.02 1085.08
   1  -5 -33 1166.60  587.62
  -1   5  32 1024.72  595.32
  -1  -5  32  233.34  396.61
   1   5 -32  376.21  421.68
   1  -5 -32  357.44  375.06
   1   5 -32  175.91  775.48
   1  -5 -32  724.08  383.02
  -1   5  31   44.86  666.77
  -1  -5  31 1376.60  606.31
  -1   5  31  351.37  554.72
   1   5 -31  441.52  339.69
   1   5 -31  886.44  522.46
   1  -5 -31  350.16  245.01
  -1   5  30  -62.23  590.10
  -1  -5  30  464.22  408.28
  -1   5  30  606.65  389.29
   1   5 -30 -425.07  379.90
   1   5 -30 1640.27  721.08
   1  -5 -30  317.13  363.34
  -1  -5  29  263.32  211.20
  -1   5  29  329.27  492.57
  -1  -5  29  517.39  717.08
  -1   5  29 -693.08  524.18
   1   5 -29  304.04  289.95
   1   5 -29 1001.52  482.65
   1  -5 -29    0.93  521.41
  -1  -5  28  794.11  763.12
  -1   5  28 1532.14  440.62
  -1  -5  28 1439.88  630.66
  -1   5  28 2303.57  632.45
   1   5 -28 1690.80  575.23
   1   5 -28 1477.44  734.52
   1  -5 -28 2103.07  499.33
  -1  -5  27  187.10  266.87
  -1   5  27  -12.28  527.33
  -1  -5  27  267.38  260.32
  -1   5  27 -143.63  521.02
   1   5 -27  253.14  399.59
   1   5 -27 -896.65  720.77
   1  -5 -27 -289.17  468.55
  -1  -5  26 1663.08  550.07
  -1   5  26 1735.94  532.92
  -1  -5  26 1044.06  881.49
  -1   5  26  848.59  321.97
   1   5 -26 1144.10  705.22
   1   5 -26  902.47  445.08
   1  -5 -26 1980.82  945.05
  -1  -5  25 4832.22 1905.02
  -1   5  25 6084.79 1864.52
  -1  -5  25 5502.08 1107.83
  -1   5  25 6821.75 1446.33
   1   5 -25 4359.27 1480.94
   1   5 -25 4991.23 1390.43
   1  -5 -25 5569.84 1801.49
  -1  -5  24 7520.17 1340.13
  -1   5  24 8469.75 2693.72
  -1  -5  24 8940.46 1825.07
  -1   5  24 9117.24 2164.21
   1   5 -24 7057.96 2448.09
   1   5 -24 8155.48 1791.78
   1  -5 -24 8163.88 1848.87
  -1  -5  23 9930.87  972.88
  -1   5  23 9484.21 1504.23
  -1  -5  2310661.59  748.45
  -1   5  2310614.72 2453.55
   1   5 -23 9264.53  657.10
   1   5 -23 8930.68 3067.20
   1  -5 -2312025.17  778.57
  -1  -5  22  849.06  399.45
  -1   5  22  260.39  532.26
  -1  -5  22  311.84  227.17
  -1   5  22 -460.04  614.34
   1   5 -22 -103.51  318.53
   1   5 -22  326.68  546.13
   1  -5 -22  354.79  379.74
  -1  -5  2120576.73 1215.59
  -1   5  2121169.15 1578.26
  -1  -5  2125990.25 1259.78
  -1   5  2123636.88 1945.80
   1   5 -2123373.14 1503.09
   1   5 -2124419.43 1683.78
   1  -5 -2124219.95 1977.67
  -1  -5  2077804.54 3420.05
  -1   5  2080774.33 3943.09
  -1  -5  2081136.54 3624.64
  -1   5  2084349.91 4986.13
   1   5 -2081454.20 3693.18
   1   5 -2085813.28 3749.03
   1  -5 -2085851.94 3574.38
  -1   5  1931227.49 1304.47
  -1  -5  1933527.10 1277.76
  -1   5  1931661.33 1410.62
   1   5 -1929386.99 2480.00
   1   5 -1932707.63 1587.34
   1  -5 -1934928.91 1420.55
  -1  -5  18 3992.23 1189.83
  -1   5  18 3755.28 1006.00
  -1  -5  18 5985.08 1358.34
  -1   5  18 3620.80 1102.63
   1   5 -18 4980.54  782.79
   1   5 -18 5977.46 1871.11
   1  -5 -18 4617.46 1038.30
  -1  -5  17 3770.56 1402.25
  -1   5  17 4500.98 1154.70
  -1  -5  17 5151.04 1550.46
  -1   5  17 5066.22 1552.76
   1   5 -17 5395.17 1178.51
   1   5 -17 4874.50  932.61
   1  -5 -17 5971.51  791.76
  -1  -5  16 5385.84 1963.34
  -1   5  16 5229.26 1383.62
  -1  -5  16 5521.90  461.39
  -1   5  16 5858.50 1260.42
   1   5 -16 6540.05 1215.99
   1   5 -16 6800.71 1690.96
   1  -5 -16 5463.69 1344.28
  -1  -5  1524999.86 2268.76
  -1   5  1522378.22 1063.82
  -1  -5  1523210.99 1101.15
  -1   5  1524518.14 2063.59
   1   5 -1525298.28 1223.72
   1   5 -1525080.00 2926.16
   1  -5 -1525564.86 1414.60
  -1  -5  14  396.04  402.80
  -1   5  14  733.16  185.23
  -1  -5  14  302.69  262.70
   1   5 -14  390.08  139.39
  -1   5  14 1222.54  518.77
   1   5 -14  504.64  327.11
   1   5 -14  895.24  663.05
   1  -5 -14  345.66  169.66
   1  -5 -13 1886.28  314.72
   1  -5 -13 2259.88  252.62
  -1  -5  13 2478.28  838.22
  -1   5  13 2136.22  869.37
  -1  -5  13 3460.26  778.63
   1   5 -13 2195.68  342.34
  -1   5  13 2153.64  648.40
   1   5 -13 2564.14  633.93
   1   5 -13 3209.18  736.69
   1  -5 -13 2367.50  600.91
   1  -5 -1210463.76  323.69
   1  -5 -1212084.07  424.90
  -1  -5  1210453.21 1998.57
  -1   5  1210523.76  599.41
  -1  -5  1210142.79  615.99
   1  -5 -1210159.90  579.94
   1   5 -1211825.76  631.86
  -1  -5  1210843.99  897.70
   1   5 -1212664.03 1187.11
   1  -5 -1211851.41 1918.82
   1  -5 -1180400.53 1533.91
   1  -5 -1181621.64 1706.05
  -1  -5  1184668.03 2600.65
   1  -5 -1182417.77 1651.32
   1   5 -1185500.48 1770.60
  -1  -5  1186690.44 1665.30
   1   5 -1188588.25 2354.77
   1  -5 -1188093.01 2338.88
   1  -5 -1045682.89 1769.40
   1  -5 -1044025.50 1766.97
  -1  -5  1046164.51 2143.25
  -1   5  1044487.29 1832.88
  -1  -5  1048191.98 2002.72
   1  -5 -1040683.74 1570.10
  -1   5  1050304.02 2121.02
   1   5 -1044872.01 2009.24
  -1  -5  1041304.14 1676.45
   1   5 -1042192.31 1949.40
   1  -5 -1047876.61 2047.75
   1  -5  -946834.88 1842.33
   1  -5  -944581.43 1912.81
  -1  -5   947188.89 2010.86
  -1   5   947134.15 1902.74
   1  -5  -942530.41 1647.90
  -1  -5   943604.35 1834.79
   1   5  -939996.93 1644.63
  -1   5   943330.77 1917.94
   1   5  -947631.71 2110.18
  -1  -5   942812.25 1841.22
   1   5  -944607.77 2131.61
   1  -5  -948227.50 2138.64
   1  -5  -8 1147.21  340.16
   1  -5  -8 1228.93  398.41
  -1  -5   8 -302.54  549.94
  -1   5   8 1331.92  358.84
   1  -5  -8 1413.60  285.75
  -1  -5   8 1693.29  460.84
   1   5  -8  915.67  456.16
  -1   5   8  721.42  538.05
   1   5  -8 1485.73  780.76
  -1  -5   8 1190.16  350.24
   1  -5  -8 1795.21  517.40
   1   5  -8 1427.00  871.53
   1  -5  -8 1560.07  463.06
   1  -5  -7  413.72  243.03
   1  -5  -7   94.27  221.07
  -1  -5   7  426.55  358.79
   1   5  -7  872.12  311.23
  -1   5   7  132.94  211.65
   1  -5  -7  234.22  159.30
  -1  -5   7  250.79  129.39
   1   5  -7  181.20  151.34
  -1   5   7  268.07  471.92
   1  -5  -7  242.82  196.79
   1   5  -7  472.35  337.09
  -1  -5   7  383.32  338.77
   1  -5  -7  277.55  188.90
   1   5  -7  962.57  702.99
   1  -5  -7  696.44  344.12
   1  -5  -6 7727.65  566.55
   1  -5  -6 7650.75 1209.41
  -1  -5   6 6762.24  554.82
   1   5  -6 8151.83  543.78
  -1   5   6 8099.26  551.88
   1  -5  -6 7448.69  705.42
  -1  -5   6 7764.42  241.50
   1   5  -6 7998.11  462.15
  -1   5   6 7724.52  927.41
   1  -5  -6 7572.33  862.30
   1   5  -6 7361.96  486.20
  -1  -5   6 7217.86  889.26
   1  -5  -6 8076.59  816.95
   1   5  -6 8462.09 2237.10
  -1  -5   6 7807.11  612.29
   1  -5  -6 9450.27 1825.99
   1  -5  -516254.91  701.53
  -1  -5   518790.27 1007.41
   1  -5  -519151.58 1018.16
   1   5  -517310.41  835.53
  -1   5   519372.98  808.12
   1  -5  -517495.34  741.60
  -1  -5   517166.03  632.85
   1   5  -516990.69  705.54
  -1   5   516965.77 1013.08
   1  -5  -516610.48  803.02
   1   5  -518908.49 1010.12
  -1  -5   517287.42  828.10
   1  -5  -520014.13 1178.03
   1   5  -518450.06 1002.47
  -1  -5   518046.01  960.92
   1  -5  -517038.95  949.46
   1  -5  -4 8141.00  404.77
  -1  -5   411556.03 2102.29
   1  -5  -410004.14  847.77
   1   5  -4 8227.17  411.70
  -1   5   4 9417.19  656.67
   1  -5  -410033.55  518.15
  -1  -5   4 8974.45  210.23
   1   5  -4 8763.41  304.13
  -1   5   4 9687.25 1112.06
   1  -5  -4 9028.89  377.93
   1   5  -410307.54 1180.33
  -1  -5   4 9123.59  464.20
  -1   5   4 8323.53 1118.09
   1  -5  -4 8866.86  573.37
   1   5  -410106.42  951.54
  -1  -5   4 9800.94  673.06
   1  -5  -3 3834.57  287.77
  -1  -5   3 4259.72  962.12
   1  -5  -3 3917.70  379.31
   1   5  -3 3935.03  489.87
  -1   5   3 3752.05  533.29
   1  -5  -3 4234.93  936.51
  -1  -5   3 4229.97  167.43
   1   5  -3 3835.45  437.44
  -1   5   3 3967.12  320.04
   1  -5  -3 4872.86  961.89
   1   5  -3 3999.17  899.72
  -1  -5   3 3874.84  481.08
  -1   5   3 4549.33 1479.63
   1  -5  -3 5379.81  919.67
   1   5  -3 4230.53 1162.35
  -1  -5   3 4582.20 1027.94
   1  -5  -2  390.46  228.61
  -1  -5   2  415.63  280.29
   1   5  -2  250.54  265.66
   1  -5  -2   64.13  202.51
   1  -5  -2  120.10  122.91
  -1  -5   2   33.21   87.54
   1   5  -2  132.34   88.36
   1  -5  -2 -176.03  231.39
  -1   5   2 -252.69  324.88
   1  -5  -2  355.27  179.12
   1   5  -2  664.10  317.57
  -1  -5   2  489.28  401.63
  -1   5   2  261.04  337.67
   1   5  -2  296.42  343.61
   1  -5  -2  190.57  212.14
  -1  -5   2 -162.92  433.03
   1  -5  -1 7171.83  432.30
  -1  -5   1 8956.74 1523.45
   1   5  -1 8331.54  501.00
   1  -5  -1 7824.21  499.58
   1  -5  -1 7467.54  764.92
  -1  -5   1 7939.71  257.35
   1   5  -1 8322.36  194.92
   1  -5  -1 7464.59  348.92
  -1   5   1 7080.11  783.28
   1  -5  -1 7502.62  339.38
   1   5  -1 7689.46  624.39
  -1  -5   1 7100.29  472.13
  -1   5   1 8484.34  892.04
   1   5  -1 7902.34  749.35
  -1  -5   1 8105.80 1213.95
   1  -5  -1 6370.08 1230.55
   1  -5   042978.73 2026.71
  -1  -5   043662.83 1949.30
   1   5   039376.74 1594.79
   1  -5   046243.13 1683.10
  -1  -5   044948.77 1430.91
   1  -5   041500.71 1478.96
   1   5   039810.15 1276.56
  -1   5   041958.09 1566.10
  -1   5   046685.23 1818.32
   1   5   044819.07 1653.38
   1  -5   043978.13 1552.66
  -1  -5   043187.80 1540.98
   1   5   044682.62 1843.90
  -1   5   045103.80 1830.80
  -1  -5   043926.52 1720.80
   1  -5   040884.09 1667.19
   1  -5   119799.09 1309.04
  -1  -5  -115826.05  920.57
   1   5   114682.61  744.78
   1  -5   117388.95  974.42
   1  -5   117305.13  747.39
  -1   5  -116895.54  732.17
  -1   5  -117626.03  832.33
   1   5   116066.90  905.64
   1  -5   116123.81  754.63
  -1  -5  -114169.08  819.53
   1   5   112236.55 1985.41
  -1  -5  -116730.71  897.27
  -1   5  -115460.52  967.59
   1  -5   116258.18  780.84
   1  -5   2 4244.49  387.61
  -1  -5  -2 5816.94 1425.58
   1   5   2 4343.76  398.77
   1  -5   2 7020.16 1809.86
   1  -5   2 4102.85  419.07
  -1   5  -2 4443.66  515.99
  -1   5  -2 4268.42  237.51
   1   5   2 4963.95 1515.03
  -1  -5  -2 4116.94  925.83
   1  -5   2 4144.65  240.03
   1   5   2 4627.60  852.58
  -1  -5  -2 4534.87 1524.22
  -1   5  -2 4570.51 1387.84
   1  -5   2 5374.30 1102.91
   1  -5   3 5946.38 1502.11
  -1  -5  -3 5997.03 1617.22
   1   5   3 6529.85  558.90
   1  -5   3 4827.12  561.52
   1  -5   3 5161.40  489.18
  -1   5  -3 5859.54  696.22
  -1   5  -3 5963.46  348.05
   1   5   3 6547.18 1959.74
  -1  -5  -3 5836.28 1409.38
   1  -5   3 5385.08  435.15
   1   5   3 5651.04  532.15
  -1  -5  -3 6869.53 1620.98
  -1   5  -3 5809.79  626.99
   1  -5   3 6149.29 1217.56
   1  -5   4  829.61  373.05
  -1  -5  -4 1538.63  602.60
   1   5   4  576.97  218.27
   1  -5   4 1096.33  594.62
   1  -5   4  978.38  214.71
  -1  -5  -4  973.24  166.09
  -1   5  -4 1273.98  237.69
   1   5   4 1212.11  532.47
  -1  -5  -4  792.13  624.22
  -1   5  -4 1069.67  238.09
   1  -5   4  796.96  172.97
  -1  -5  -4 1432.05  583.41
  -1   5  -4  833.16  526.93
   1  -5   4  284.82  436.91
  -1  -5  -4 1060.05  463.04
   1  -5   5 1081.91  296.08
  -1  -5  -5  429.49  241.86
   1   5   5  261.93  354.68
   1  -5   5  597.16  306.62
   1   5   5 1056.01  222.47
  -1  -5  -5  720.92  202.01
   1  -5   5 1400.88  409.28
  -1   5  -5  710.32  297.69
   1   5   5 1073.02  337.86
  -1  -5  -5  589.22  356.87
  -1   5  -5  657.16  198.51
   1  -5   5  698.96  127.54
  -1  -5  -5  395.56  519.85
  -1   5  -5  501.01  427.17
   1  -5   5  599.20  232.25
  -1  -5  -5  188.65  588.90
  -1  -5  -6  594.47  525.21
   1   5   6  825.56  270.10
   1  -5   6 1363.30  431.60
   1   5   6  915.99  329.72
   1  -5   6 1316.51  424.32
  -1  -5  -6 1026.53  284.20
  -1   5  -6 1795.23  432.29
   1   5   6 1610.01  502.53
  -1  -5  -6 2002.97  671.11
  -1   5  -6  890.56  313.39
   1  -5   6  821.67  221.72
  -1   5  -6  190.86  522.40
  -1  -5  -6  740.79  424.31
  -1  -5  -7 2357.34  609.19
   1   5   7 1324.55  230.60
   1  -5   7 1812.35  696.98
   1   5   7 1295.03  230.00
   1  -5   7 1283.35  378.82
  -1  -5  -7 1508.48  349.77
  -1   5  -7 1384.47  375.45
  -1   5  -7 1636.22  271.56
   1   5   7 1423.93  712.01
  -1   5  -7 1933.77  367.95
  -1   5  -7 1767.78  791.92
  -1  -5  -7 1451.34  715.29
  -1  -5  -8 7739.35  965.66
   1   5   8 7939.65  482.43
   1  -5   8 7359.26  718.45
   1   5   8 6682.08  263.97
   1  -5   8 7967.64  546.87
  -1  -5  -8 6947.86  289.28
  -1   5  -8 6887.80  410.32
   1   5   8 6217.05 2054.52
  -1   5  -8 7394.20  581.96
  -1   5  -8 9017.82 2561.88
  -1  -5  -8 7375.99 2187.91
  -1  -5  -9 4343.70  415.49
   1   5   9 3296.10  323.43
   1  -5   9 4103.45  891.39
   1   5   9 4327.68  529.12
   1  -5   9 3729.51  950.82
  -1  -5  -9 3220.11  203.73
  -1   5  -9 3349.38  309.22
   1   5   9 4730.51 1329.03
  -1   5  -9 4402.87  768.73
  -1  -5  -9 3588.54 1106.77
  -1  -5 -10  264.32  351.72
   1   5  10 1019.01  284.65
   1  -5  10  925.69  586.40
   1   5  10  445.67  101.09
   1  -5  10  585.77  359.74
  -1  -5 -10  638.00  145.94
  -1   5 -10  669.95  230.95
   1   5  10 -501.40  725.90
  -1   5 -10  686.64  281.06
  -1  -5 -10  879.43  513.37
  -1  -5 -11 2397.70  501.16
   1   5  11 1568.75  331.93
   1  -5  11 1450.38  663.77
   1   5  11 1741.20  378.43
   1  -5  11 2213.86  489.61
  -1  -5 -11 1421.02  475.46
  -1   5 -11 1459.37  296.06
   1   5  11  866.77  646.50
  -1   5 -11 2257.69  508.13
  -1  -5 -11 2021.55  837.53
  -1  -5 -12  269.77  212.75
   1   5  12  490.38  148.04
   1  -5  12 -377.98  446.77
   1   5  12  316.82  167.09
   1  -5  12  505.55  227.41
  -1  -5 -12  526.79  185.54
  -1   5 -12  582.30  156.83
   1   5  12 -666.16  689.20
  -1   5 -12 1148.04  341.37
  -1  -5 -12  732.99  390.78
  -1  -5 -13 6880.43  423.68
   1   5  13 6448.93  528.37
   1  -5  13 9394.57 1827.69
   1   5  13 7854.55  885.70
   1  -5  13 8031.69  551.75
   1   5  13 5961.91 1497.87
  -1   5 -13 6880.96  786.74
  -1   5 -13 6877.89  464.90
  -1  -5 -13 7268.70  759.94
  -1  -5 -14  149.22  105.76
   1   5  14  -45.27  140.21
   1  -5  14  -38.73  315.31
   1   5  14  229.28  122.98
   1  -5  14  101.40  172.71
   1   5  14  237.13  259.72
  -1   5 -14  258.04  148.77
  -1   5 -14 -130.75  221.28
  -1   5 -14  125.72  379.99
  -1  -5 -14  477.11  474.83
  -1  -5 -15 2313.01  489.36
   1   5  15 1687.07  380.61
   1  -5  15 3968.57  938.35
   1   5  15 2231.95  510.07
   1  -5  15 2550.97  752.80
   1   5  15 1985.79 1477.13
  -1   5 -15 1639.98  280.66
  -1   5 -15 2549.82  619.86
  -1   5 -15 1703.99  634.88
  -1  -5 -15 2812.80  847.76
  -1  -5 -16 4589.48  365.81
   1   5  16 3917.59  764.45
   1  -5  16 3669.14 1190.11
   1   5  16 4942.68 1228.04
   1  -5  16 5147.17 1430.50
   1   5  16 5834.81 2652.28
  -1   5 -16 4787.29  610.82
  -1   5 -16 5071.03 1109.40
  -1   5 -16 5540.41 1437.95
  -1  -5 -16 5080.55 1566.28
  -1  -5 -17 1860.98  486.28
   1   5  17 1552.70  446.78
   1  -5  17 2305.30  591.36
   1   5  17 1454.38  318.41
   1  -5  17 2595.15  596.34
   1   5  17  995.94  618.96
  -1   5 -17 1180.18  427.66
  -1   5 -17 2201.34  579.39
  -1   5 -17 2849.81 1105.98
  -1  -5 -17 2643.68  564.66
  -1  -5 -18 3776.87  746.83
   1   5  18 4386.80  424.13
   1  -5  18 4017.39 1025.69
   1   5  18 4171.03  668.83
   1  -5  18 5539.35 1152.17
   1   5  18 4857.29 1093.48
  -1   5 -18 4085.12  955.60
  -1   5 -18 4929.61 1397.61
  -1  -5 -18 4475.07 2423.61
  -1  -5 -19 5042.25  611.39
   1   5  19 3543.24  837.92
   1  -5  19 3595.51 1259.15
   1   5  19 5943.12 1500.65
   1  -5  19 6394.65 1231.72
   1   5  19 4052.23 1605.93
  -1   5 -19 4425.72 1088.92
  -1   5 -19 4753.63 1194.27
  -1  -5 -19 5720.45 1221.85
  -1  -5 -20 9699.63  318.39
   1  -5  2011022.68 1694.99
   1   5  20 9803.72  613.56
   1  -5  2013786.94 1802.32
   1   5  2011282.45 3268.65
  -1   5 -20 8937.06 1326.23
  -1   5 -2011259.86 2948.91
  -1  -5 -2014668.42 2207.37
   1   5  2171434.01 2525.27
   1  -5  2166493.25 2747.93
   1   5  2163605.00 2446.94
  -1   5 -2163951.99 2697.98
   1  -5  2229603.79 1862.00
   1   5  2230254.45 2607.42
   1  -5  2227042.90 1350.57
   1   5  2231158.97 2716.76
  -1   5 -2225216.96 1393.75
  -1   5 -2226631.11 3740.59
  -1  -5 -2230989.82 1591.25
   1  -5  23  818.87  505.83
   1   5  23  383.35  300.34
   1  -5  23  203.43  200.25
   1   5  23  206.11  449.25
  -1   5 -23  140.02  214.65
  -1   5 -23  565.99 1055.62
  -1  -5 -23  316.79  356.69
   1  -5  24 -598.96  471.22
   1   5  24  625.72  426.53
   1  -5  24  -25.07  380.33
   1   5  24  615.98  493.29
  -1   5 -24  244.99  288.96
  -1   5 -24  494.72  559.94
  -1  -5 -24  -70.52  273.19
   1  -5  25  497.74  661.75
   1   5  25   -2.06  416.33
   1  -5  25  872.03  370.85
   1   5  25 1275.33  795.47
  -1   5 -25  564.44  177.71
  -1   5 -25 2256.06 1020.52
  -1  -5 -25  563.37  376.94
   1  -5  26  849.70  476.00
   1   5  26  748.60  278.97
   1  -5  26  654.82  216.27
   1   5  26  796.56  317.11
  -1   5 -26  343.50  225.65
  -1   5 -26  638.01  578.54
  -1  -5 -26  204.30  604.08
   1  -5  27  441.84  381.56
   1   5  27  692.25  577.82
   1  -5  27 1081.34  586.50
   1   5  27  937.51  442.73
  -1   5 -27  -59.65  317.92
  -1   5 -27 2066.52 1102.91
  -1  -5 -27  781.83  426.00
   1  -5  28  128.03  357.72
   1   5  28 -154.38  464.71
   1  -5  28 -647.01  542.27
   1   5  28  853.24  362.07
  -1   5 -28  286.26  293.84
  -1   5 -28   98.16  716.73
  -1  -5 -28 1339.19  569.02
   1  -5  29  505.61  331.42
   1   5  29  988.83  271.94
   1  -5  29 1475.17  553.31
   1   5  29 -228.90  510.95
  -1   5 -29  387.65  229.95
  -1   5 -29  510.24  959.65
  -1  -5 -29  110.84  564.06
   1   5  30  135.79  317.00
   1  -5  30  216.49  480.31
   1   5  30 -254.72  520.43
  -1   5 -30 -606.33  789.87
  -1  -5 -30 -103.14  614.21
   1   5  31  786.23  440.06
   1  -5  31  -86.95  574.45
   1   5  31 -455.50  556.35
  -1   5 -31 -125.55  988.71
  -1  -5 -31  -70.28  600.17
   1   5  32 1001.87  762.69
   1   5  32  639.64  567.26
  -1   5 -32  658.73  667.06
  -1  -5 -32  406.83  590.62
   1   5  33 2876.88 2058.91
   1  -5  33 4771.84 1956.36
   1   5  33 5777.28 2283.62
  -1   5 -33 6226.12 2420.08
  -1  -5 -3310858.26 1925.05
   1   5  34 -113.68  409.96
   1  -5  34  787.79  379.18
   1   5  34 1079.19  521.96
  -1   5 -34  739.87  828.89
  -1  -5 -34 1533.06 1093.21
   1   5  35  783.64  491.14
   1   5  35  519.47  551.49
   1   5  36 1151.66  557.28
  -1   6  36  492.47  389.73
  -1   6  35 4313.32 2399.44
   1  -6 -35 5559.59 3476.73
  -1   6  34 1345.26  775.40
  -1  -6  34 1480.14 1208.85
   1  -6 -34 1694.46  819.20
   1   6 -34 3058.84 1379.60
   1  -6 -34  688.50  505.74
  -1   6  33  650.35  437.10
  -1  -6  33  749.75  540.23
   1  -6 -33 1354.64  513.34
   1   6 -33 1054.15  986.25
   1  -6 -33  910.87 1017.62
  -1   6  32  273.90  223.24
  -1  -6  32 1567.77  700.64
  -1   6  32 1120.33  906.62
   1   6 -32  374.79  996.30
   1  -6 -32 1623.33  791.77
  -1   6  31  236.33  581.87
  -1  -6  31  696.49  500.94
  -1   6  31 1005.12  535.52
   1  -6 -31 1151.95  544.45
  -1   6  30  630.04  691.31
  -1  -6  30  253.17  284.20
  -1   6  30  788.26  412.91
   1   6 -30  755.90  454.60
   1   6 -30  312.07  412.87
   1  -6 -30  544.87  216.68
  -1  -6  29  329.58  380.62
  -1   6  29 1430.62 1243.09
  -1  -6  29 2449.67  693.36
  -1   6  29  608.12  776.43
   1   6 -29  208.30  399.03
   1   6 -29  862.72  516.77
   1  -6 -29  -98.71  502.10
  -1  -6  28 2234.50 1072.84
  -1   6  28 2745.70 1411.80
  -1  -6  28 2204.90  994.73
  -1   6  28 3173.26  715.20
   1   6 -28 3109.29  932.48
   1   6 -28 2077.27  858.58
   1  -6 -28 3678.62 1436.44
  -1  -6  27 1973.01 1042.44
  -1   6  27 2115.35  972.57
  -1  -6  27 2395.34  826.71
  -1   6  27 3794.57 1242.10
   1   6 -27 2580.40 1014.32
   1   6 -27 1271.53  469.05
   1  -6 -27 1982.74 1219.32
  -1  -6  26   46.51  361.12
  -1   6  26  278.36  331.98
  -1   6  26 -635.99  549.52
   1   6 -26  535.11  343.15
   1   6 -26 1225.47  704.33
   1  -6 -26 -282.29  485.41
  -1  -6  25 1167.03  620.38
  -1   6  25  748.30  464.07
  -1  -6  25 1455.36  529.73
  -1   6  25  898.75  474.60
   1   6 -25  171.21  374.70
   1   6 -25 -226.35  766.35
   1  -6 -25  677.18  661.90
  -1  -6  24 1940.50  799.00
  -1   6  24 1199.20  579.60
  -1  -6  24  406.15  432.50
  -1   6  24 1632.00  488.67
   1   6 -24  461.58  540.01
   1   6 -24 1224.19  498.27
   1  -6 -24  688.86  553.09
  -1  -6  2327338.95 2631.66
  -1   6  2320532.98 1302.17
  -1  -6  2323499.68 1332.33
  -1   6  2326738.74 2043.83
   1   6 -2323924.51 1375.47
   1   6 -2324504.88 3541.26
   1  -6 -2326918.36 1444.72
  -1  -6  22 3319.17 1216.06
  -1   6  22 1502.11 1168.07
  -1  -6  22 1954.68  607.85
  -1   6  22 1783.86  434.00
   1   6 -22 2422.27  693.03
   1   6 -22  734.31 1081.94
   1  -6 -22 4044.45 1075.39
  -1  -6  21112427.5 3923.09
  -1   6  21103001.4 3520.34
  -1  -6  21108020.4 4309.69
  -1   6  21112797.6 3776.70
   1   6 -21105976.5 4070.11
   1   6 -21109533.9 5302.94
   1  -6 -21117813.0 4279.22
  -1  -6  20 1608.05  733.16
  -1   6  20 1139.98  668.52
  -1  -6  20 2352.50  636.55
  -1   6  20 2017.44  453.28
   1   6 -20 1889.97  693.17
   1   6 -20 1259.14  562.63
   1  -6 -20 1371.71  499.64
  -1  -6  1928943.00 1539.33
  -1   6  1925939.36 1330.28
  -1  -6  1929471.30 1458.34
  -1   6  1926895.43 1380.82
   1   6 -1928930.56 1392.78
   1   6 -1934346.49 2076.98
   1  -6 -1928853.59 2064.48
  -1  -6  18 -188.50  514.43
  -1   6  18   88.93  172.73
  -1  -6  18  329.77  312.05
  -1   6  18 -327.82  608.09
   1   6 -18   -9.25  463.69
   1   6 -18  582.13  427.69
   1  -6 -18  252.16  194.35
  -1  -6  17 2298.11  907.37
  -1   6  17 3153.04  849.78
  -1  -6  17 3385.55  869.74
  -1   6  17 2896.93  857.95
   1   6 -17 3073.05 1072.40
   1   6 -17 2699.85 1366.99
   1  -6 -17 4077.03  989.57
  -1  -6  16 1335.46  630.16
  -1   6  16  499.70  189.65
  -1  -6  16 1784.42  313.60
  -1   6  16 1252.73  471.95
   1   6 -16  465.26  539.71
   1   6 -16 3318.16 1098.38
   1  -6 -16 1094.74  517.39
   1  -6 -15   16.06   39.76
   1  -6 -15  128.75   49.61
  -1  -6  15  379.71  427.78
  -1   6  15  355.49  246.49
  -1  -6  15  132.09  111.12
   1   6 -15   28.85  272.25
   1   6 -15 -199.82  699.51
   1  -6 -15  708.44  554.77
   1  -6 -14  279.20  148.62
   1  -6 -14  105.41  105.82
  -1  -6  14  477.69  694.04
  -1   6  14  181.71  231.39
  -1  -6  14  989.52  254.14
   1   6 -14  349.57   93.39
   1   6 -14  431.36  268.52
   1   6 -14 -309.24  695.82
   1  -6 -14   32.67  403.83
   1  -6 -13  119.63   75.95
   1  -6 -13  117.30   82.90
  -1  -6  13  423.33  251.25
  -1   6  13  640.04  320.89
  -1  -6  13  141.59  280.76
  -1   6  13 -653.83  568.73
   1   6 -13  213.15  251.48
  -1  -6  13   32.81   76.48
   1   6 -13  709.72  534.24
   1  -6 -13  125.51  575.27
   1  -6 -12  388.10  204.21
   1  -6 -12  262.28  129.79
  -1  -6  12 -699.73  534.12
  -1   6  12  707.05  230.07
  -1  -6  12  774.39  379.37
   1  -6 -12  631.92  148.98
  -1   6  12  858.34  423.90
   1   6 -12  968.78  316.25
  -1  -6  12  626.61  209.49
   1   6 -12 2354.80 1014.79
   1  -6 -12 -111.23  516.36
   1  -6 -1111047.38  536.46
   1  -6 -1110693.38  563.44
  -1  -6  1110591.71 1006.71
  -1   6  1110717.76  964.19
  -1   6  1110116.70  942.54
   1   6 -1111650.91 1380.11
  -1  -6  1111162.04  515.68
   1   6 -1113039.66 2997.94
   1  -6 -1110002.04  906.97
   1  -6 -10 3662.75  557.80
   1  -6 -10 3366.06  821.41
  -1  -6  10 3016.48 1161.01
  -1   6  10 2756.74  479.29
  -1  -6  10 3343.53  782.56
   1  -6 -10 2488.97  279.50
  -1   6  10 2584.97  665.57
   1   6 -10 2753.36  576.46
  -1  -6  10 2937.62  629.76
   1   6 -10 4335.60 1254.78
   1  -6 -10 3996.19 1027.47
   1  -6  -923103.24  973.96
   1  -6  -923919.57 1123.02
  -1  -6   923222.60 1276.58
  -1   6   922741.18 1553.41
   1  -6  -921154.82  944.34
  -1  -6   922744.62  915.08
   1   6  -921556.75  896.60
  -1   6   925556.38 1252.31
   1   6  -923334.29 1096.36
  -1  -6   922273.39  967.96
   1   6  -927461.39 2999.08
   1  -6  -922155.45 2004.25
   1  -6  -8   46.09  269.05
   1  -6  -8  579.87  256.01
  -1  -6   8  -22.50  415.63
  -1   6   8    6.91  144.60
   1  -6  -8  227.23   95.65
  -1  -6   8  -58.18  176.34
   1   6  -8 -196.76  314.25
  -1   6   8   20.09  454.34
   1   6  -8  421.73  377.66
  -1  -6   8  169.86  127.62
   1   6  -8  337.39  419.89
   1  -6  -8   60.95  551.27
   1  -6  -717952.09  753.32
   1  -6  -718609.37  843.75
  -1   6   718270.63  854.22
   1  -6  -719385.65  943.85
  -1  -6   718428.53  677.27
  -1   6   718231.12  897.09
   1   6  -718873.95  934.95
  -1  -6   718111.81 1209.30
   1   6  -719607.07 3095.81
   1  -6  -720543.01 1090.03
   1  -6  -6 7098.46  689.61
   1  -6  -6 7376.02  774.06
  -1  -6   6 9599.86 2769.22
  -1   6   6 6591.41  667.24
   1  -6  -6 7568.86  405.98
  -1  -6   6 7709.13  301.74
  -1   6   6 6700.11 1981.93
   1  -6  -6 7092.89  589.13
   1   6  -6 7961.24  796.55
  -1  -6   6 7459.64 1152.04
   1   6  -610505.06 1863.18
   1  -6  -6 9438.59  831.12
   1  -6  -5 4731.08 1060.09
  -1  -6   5 3344.51  758.82
   1  -6  -5 3378.72 1022.91
  -1   6   5 3311.07  745.60
   1  -6  -5 3391.79  467.48
  -1  -6   5 2782.73  274.22
   1   6  -5 2240.42  838.32
  -1   6   5 2995.63  709.28
   1  -6  -5 3118.65  466.19
   1   6  -5 3201.45  750.48
  -1  -6   5 3258.46  647.75
  -1   6   5 3360.37  866.09
   1  -6  -5 2834.71 1002.19
   1   6  -5 3982.71 1001.49
   1  -6  -4 3215.71  723.87
  -1  -6   4 3321.53  713.29
   1  -6  -4 2996.71  740.84
  -1   6   4 2483.71  545.98
   1  -6  -4 2793.14  665.15
  -1  -6   4 2475.09  286.32
   1   6  -4 2215.09  563.57
  -1   6   4 2219.63 1004.61
   1  -6  -4 2848.61  651.23
   1   6  -4 2090.22  543.25
  -1  -6   4 2808.81  670.78
  -1   6   4 2536.30  644.84
   1  -6  -4 1895.40  613.23
   1   6  -4 2004.00  884.82
   1  -6  -3 6118.44 1413.55
  -1  -6   3 8312.59 2305.56
   1  -6  -3 7177.01  549.65
   1  -6  -3 5213.54  561.76
  -1  -6   3 6376.28  233.47
   1   6  -3 6294.18  457.13
   1  -6  -3 6811.47  772.07
  -1   6   3 5170.08  620.99
   1  -6  -3 6300.29 1044.18
   1   6  -3 6537.54  570.84
  -1  -6   3 5958.17  520.10
  -1   6   3 4803.34 1742.89
   1  -6  -3 5138.32 1079.75
   1   6  -3 5804.44 2003.47
   1  -6  -219392.33 1298.03
  -1  -6   222107.17 1371.11
   1  -6  -220304.03  952.56
   1   6  -219295.80  870.53
   1  -6  -217592.28  929.59
  -1  -6   220481.50  740.70
   1   6  -219251.97  751.16
   1  -6  -222529.25 1040.83
  -1   6   221340.29  729.83
   1  -6  -218862.25 1090.57
   1   6  -221743.33 1185.62
  -1  -6   219652.00 1347.23
  -1   6   219092.71 1299.22
   1   6  -221254.69 3032.89
   1  -6  -217371.20  850.00
   1  -6  -1 8285.18  912.54
  -1  -6   1 8190.16  785.96
   1   6  -1 7779.70  446.10
   1  -6  -1 7834.10  814.72
   1  -6  -1 6440.31  509.20
   1   6  -1 7463.73  229.56
   1  -6  -1 7967.50  611.13
  -1   6   1 7482.72  465.06
   1  -6  -1 7467.90  598.44
   1   6  -1 8050.90  737.09
  -1  -6   1 7198.09  723.54
  -1   6   1 6729.27 2031.07
   1   6  -1 5026.57 1299.86
   1  -6  -1 7320.34  666.79
   1  -6   011711.10  856.50
  -1  -6   015665.23 2009.24
   1   6   013445.67 1156.38
   1  -6   014858.81 1434.70
  -1  -6   013551.24  515.59
   1  -6   011975.76  615.59
  -1   6   013265.66  628.97
   1   6   014168.08  938.10
   1  -6   011729.15  622.94
  -1  -6   012501.01  764.30
   1   6   013303.69 2919.07
  -1   6   011894.39 2388.98
   1  -6   012033.21  680.76
   1  -6   112315.87  650.77
  -1  -6  -113700.92  932.92
   1   6   112453.68  652.95
   1  -6   113846.72 1802.29
   1  -6   113980.00  875.56
  -1   6  -113459.61  699.23
  -1   6  -113956.05  685.50
   1   6   115683.06 1763.63
   1  -6   113840.50  634.10
  -1  -6  -113920.35  787.94
   1   6   113133.85  930.51
  -1   6  -115192.31 1278.77
   1  -6   113302.26 1328.63
   1  -6   2  489.61  252.90
   1   6   2 -180.19  281.46
   1  -6   2  703.61  655.62
   1  -6   2  146.00  176.57
  -1   6  -2  193.72  228.38
  -1   6  -2  520.47  350.48
   1   6   2  143.64  303.65
  -1  -6  -2  233.69  284.79
   1  -6   2  230.85  195.29
   1   6   2  260.69  466.83
  -1   6  -2 -606.60  588.37
   1  -6   2  313.95  297.79
  -1  -6  -3  367.73  316.81
   1   6   3  347.53  122.48
   1  -6   3  182.72  382.00
   1  -6   3   63.41  199.77
  -1   6  -3  626.20  376.30
   1   6   3  752.91  305.21
  -1   6  -3  362.64  267.48
  -1  -6  -3  943.66  492.98
   1  -6   3  132.54  157.81
   1   6   3 1168.84  643.48
  -1   6  -3  515.41  588.40
   1  -6   3  116.51  201.57
  -1  -6  -4 7521.48 1733.52
   1   6   4 4689.31  570.83
   1  -6   4 5137.33  619.47
   1  -6   4 6568.66  732.18
  -1   6  -4 7153.09  990.57
   1   6   4 7341.79 1505.78
  -1   6  -4 6111.19  418.47
  -1  -6  -4 7078.23 1620.62
   1  -6   4 6826.41  600.22
   1   6   4 8467.05 1933.09
  -1   6  -4 8570.54 1778.71
  -1  -6  -556769.89 2195.66
   1   6   553866.58 2117.52
   1  -6   556419.21 1327.84
   1   6   556279.27  531.45
   1  -6   551116.82 1975.66
  -1  -6  -551370.31 1940.14
  -1   6  -554372.20 2187.26
  -1   6  -556378.99  587.63
   1  -6   554510.74 2116.25
  -1   6  -555466.89 2479.13
  -1  -6  -559790.90 1557.99
  -1  -6  -6 1436.69  431.80
   1   6   6 1380.89  321.75
   1  -6   6 1293.81  631.09
   1   6   6 1862.84  523.97
   1  -6   6 2172.38  483.56
  -1  -6  -6 1972.86  398.82
  -1   6  -6 1660.23  344.41
   1   6   6 1473.58  512.43
  -1   6  -6 1869.71  447.78
   1  -6   6 1543.47  283.55
  -1   6  -6 2210.82  455.86
  -1  -6  -6 2628.11  951.27
  -1  -6  -7  247.56  317.35
   1   6   7  536.34  166.29
   1  -6   7  499.15  189.51
   1   6   7  768.55  311.59
   1  -6   7  659.50  341.24
  -1  -6  -7  563.00  165.96
  -1   6  -7  -54.42  296.17
   1   6   7 -491.13  677.40
  -1   6  -7  748.12  357.96
   1  -6   7  225.44   70.74
  -1   6  -7  -16.08  613.20
  -1  -6  -7  908.78  556.48
  -1  -6  -8 5788.70 1489.08
   1   6   8 5756.26  641.76
   1  -6   8 4408.98 1332.63
   1   6   8 5809.64  825.05
   1  -6   8 6198.96  444.15
  -1  -6  -8 6169.94  215.32
  -1   6  -8 5453.87  427.43
   1   6   8 5979.76 2046.73
  -1   6  -8 6133.34  731.44
  -1   6  -8 7858.15 2469.79
  -1  -6  -8 7020.93 1381.41
  -1  -6  -9   85.37  152.74
   1   6   9  322.33  140.65
   1  -6   9  669.83  328.38
   1   6   9  457.20  170.87
   1  -6   9  108.94  305.45
  -1  -6  -9  333.96  170.18
  -1   6  -9  286.61  129.33
   1   6   9  321.22  438.42
  -1   6  -9  381.60  218.72
  -1   6  -9  221.97  424.46
  -1  -6  -9 -108.85  573.41
  -1  -6 -10  194.30  195.30
   1   6  10  417.11  247.48
   1  -6  10  350.49  348.11
   1   6  10  177.01  130.34
   1  -6  10  -93.58  289.35
  -1  -6 -10   39.27  117.80
  -1   6 -10  166.23   99.53
  -1   6 -10  168.25  170.52
  -1  -6 -10  234.52  531.29
  -1  -6 -11  574.93  355.13
   1   6  11  887.17  212.03
   1  -6  11 1380.05  587.89
   1   6  11  836.80  172.00
   1  -6  11  670.19  190.23
  -1  -6 -11  169.22  182.07
  -1   6 -11  438.12  126.31
   1   6  11 1109.40 1037.21
  -1   6 -11  169.35  228.26
  -1  -6 -11 1380.97  520.18
  -1  -6 -12 1429.13  332.67
   1   6  12  316.55  197.34
   1  -6  12  -45.03  612.53
   1   6  12  740.42  243.89
   1  -6  12 1095.68  287.95
  -1  -6 -12  427.36  133.78
  -1   6 -12  715.60  191.11
   1   6  12  506.45  468.50
  -1   6 -12 1077.54  313.76
  -1  -6 -12  900.61  569.15
  -1  -6 -1324071.03 1039.92
   1   6  1322111.75  967.86
   1  -6  1322028.35 1231.03
   1   6  1324437.72 1397.82
   1  -6  1323242.43 1020.10
  -1  -6 -1320108.67  861.85
  -1   6 -1321296.20 1006.89
   1   6  1323836.47 1439.19
  -1   6 -1323036.09 1139.45
  -1  -6 -1323636.89 1252.49
  -1  -6 -14  268.47  287.80
   1   6  14  192.41  203.55
   1  -6  14  356.15  790.73
   1   6  14  158.77  167.97
   1  -6  14  801.13  339.44
  -1   6 -14  545.75  215.19
   1   6  14  585.95  288.27
  -1   6 -14  412.72  196.53
  -1   6 -14 1166.83  577.46
  -1  -6 -14  -60.93  582.20
  -1  -6 -15 2373.05  297.03
   1   6  15 1998.19  381.56
   1  -6  15 2712.14  791.89
   1   6  15 2447.88  587.37
   1  -6  15 2804.77  609.40
   1   6  15 3196.07  768.24
  -1   6 -15 2230.60  460.74
  -1   6 -15 2530.64  670.77
  -1  -6 -15 2250.49  589.46
  -1  -6 -16 1146.48  291.62
   1   6  16  857.54  275.51
   1  -6  16  492.38  570.08
   1   6  16  885.97  296.83
   1  -6  16  938.63  347.18
   1   6  16  -48.45  742.23
  -1   6 -16  683.18  255.38
  -1   6 -16  812.60  324.01
  -1   6 -16 1361.94  582.44
  -1  -6 -16 1850.02  503.04
  -1  -6 -17 9106.06  466.91
   1   6  17 7394.73  875.42
   1  -6  17 9885.31  930.24
   1   6  17 8083.80  936.97
   1  -6  17 9874.91  576.08
   1   6  1710560.54 1426.63
  -1   6 -17 7757.06  663.10
  -1   6 -17 9190.47 1069.88
  -1   6 -1710053.03 1414.52
  -1  -6 -1710779.36 1222.83
  -1  -6 -18 1054.70  231.99
   1   6  18  898.55  212.04
   1  -6  18  977.45  323.37
   1   6  18  649.35  319.87
   1  -6  18  784.48  389.88
   1   6  18  114.42  636.86
  -1   6 -18 1155.42  338.52
  -1   6 -18 1407.61  720.30
  -1  -6 -18 2151.46  663.40
  -1  -6 -1912072.23  293.22
   1  -6  1911351.97 1714.51
   1   6  1912133.01 1740.24
   1  -6  1912201.08  562.12
   1   6  1912709.14 2604.01
  -1   6 -1912002.12 1365.69
  -1   6 -1913076.61 1422.30
  -1  -6 -1911522.08  846.04
  -1  -6 -20 2251.73  471.00
   1  -6  20 4298.40 1263.66
   1   6  20 3649.67  807.55
   1  -6  20 4041.34  928.23
   1   6  20 2983.03  696.99
  -1   6 -20 2829.91  643.90
  -1   6 -20 2977.14 1004.98
  -1  -6 -20 4979.37 1526.43
   1  -6  21 3018.29 1088.55
   1   6  21 4790.60 1083.23
   1  -6  21 5097.63  856.00
   1   6  21 5035.98 1584.89
  -1   6 -21 5178.00 1401.53
  -1   6 -21 4672.77 1153.78
  -1  -6 -21 6974.66 1264.27
   1  -6  22  727.09  382.09
   1   6  22  357.26  277.34
   1  -6  22  424.38  326.59
   1   6  22  666.47  590.40
  -1   6 -22  639.52  249.64
  -1   6 -22   45.42  338.21
  -1  -6 -22  563.09  345.78
   1  -6  2351252.56 2890.08
   1   6  2343001.61 2359.07
   1  -6  2352859.85 2786.35
   1   6  2345402.72 3119.09
  -1   6 -2343447.55 2752.54
  -1   6 -2337890.59 3108.31
  -1  -6 -2350584.98 2929.17
   1  -6  24  639.27  582.28
   1   6  24 -112.56  474.56
   1  -6  24  204.76  316.27
   1   6  24 -565.58  577.25
  -1   6 -24 -152.78  328.65
  -1   6 -24 -783.59  872.12
  -1  -6 -24  507.35  617.34
   1  -6  25  561.59  496.31
   1   6  25  183.06  326.21
   1  -6  25  492.81  343.40
   1   6  25  944.20  456.48
  -1   6 -25  359.27  463.01
  -1   6 -25 1231.65  902.90
  -1  -6 -25  564.41  422.35
   1  -6  26  380.85  508.75
   1   6  26  744.79  583.01
   1  -6  26 1175.00  481.62
   1   6  26 1480.63  472.02
  -1   6 -26  611.18  372.64
  -1  -6 -26 -109.33  513.60
   1  -6  27  522.01  417.73
   1   6  27  643.29  423.29
   1  -6  27  947.68  428.67
   1   6  27  677.85  489.87
  -1   6 -27 1197.69  721.29
  -1  -6 -27  265.11  482.81
   1  -6  28 1802.27  706.93
   1   6  28  595.70  604.24
   1  -6  28   89.21  292.07
   1   6  28 1195.70 1244.50
  -1   6 -28 2270.26 1086.82
   1  -6  29 1871.92  853.83
   1   6  29 1729.54 1483.64
   1  -6  29 1088.31  489.84
   1   6  29 1858.21  579.25
  -1   6 -29 2220.64 1359.60
  -1  -6 -29 1329.83  606.26
   1   6  30 -969.79  466.66
   1  -6  30 -134.22  531.25
   1   6  30 -412.11  639.05
  -1   6 -30 -100.71  846.51
  -1  -6 -30 -308.80  601.88
   1   6  31 1255.50  850.15
   1  -6  31 2004.97  537.93
   1   6  31 2349.48  745.75
  -1   6 -31  975.79 1240.74
  -1  -6 -31 1595.17  894.35
   1   6  32 -230.25  520.62
   1  -6  32  747.48  621.44
   1   6  32  782.24  538.18
  -1   6 -32 1167.20  912.20
  -1  -6 -32  999.42  551.03
   1   6  33 7035.36 1072.78
   1  -6  33 3181.12 2020.44
   1   6  33 4416.53 1678.35
  -1   6 -33 2454.11 1310.25
  -1  -6 -33 4721.28 2088.34
   1   6  34 1051.64  483.31
   1   6  34 1404.36 1172.81
   1   6  35 1779.56  604.33
  -1   7  35  280.85  651.05
  -1   7  34 1647.39 1624.36
   1  -7 -34 5442.65 1755.99
   1   7 -34 3349.08 1919.59
   1  -7 -34 2446.74 1208.71
  -1   7  33  653.16  503.02
  -1  -7  33  896.68  375.90
  -1   7  33  742.78  328.75
   1   7 -33  334.01  909.86
   1  -7 -33 1512.79  837.09
  -1   7  32  487.11  748.24
  -1  -7  32 1216.82  736.39
  -1   7  32 1385.27  472.16
   1   7 -32 2854.00 1167.39
   1  -7 -32 1140.90  527.47
  -1   7  31  786.18  795.71
  -1  -7  31  310.40  468.17
  -1   7  31 1895.81  736.08
   1   7 -31  851.41 1364.49
   1  -7 -31  412.33  541.85
  -1  -7  30 1066.05  540.13
  -1   7  30  939.85  640.84
  -1  -7  30  829.63  562.53
  -1   7  30  297.19  514.28
   1   7 -30  539.41  834.73
   1  -7 -30  742.87  425.97
  -1  -7  29  230.89  460.25
  -1   7  29  360.45  402.56
  -1  -7  29 -437.59  577.37
  -1   7  29  -10.85  591.61
   1   7 -29  474.58  579.09
   1  -7 -29  380.99  277.17
  -1  -7  28  183.09  430.04
  -1   7  28  514.71  353.36
  -1  -7  28  799.65  341.50
  -1   7  28  128.74  381.28
   1   7 -28 -129.52  360.57
   1   7 -28  547.01  874.92
   1  -7 -28  864.42  341.87
  -1  -7  27  575.77  437.58
  -1   7  27 -313.06  571.61
  -1  -7  27 -158.70  466.72
  -1   7  27  817.12  423.57
   1   7 -27   26.17  413.82
   1   7 -27  682.48  808.87
   1  -7 -27  209.27  171.74
  -1  -7  26 4429.61 1413.29
  -1   7  26 3163.31  823.04
  -1  -7  26 3323.03 1002.74
  -1   7  26 4669.14  828.89
   1   7 -26 2495.66 1207.48
   1   7 -26 6325.30 1178.83
   1  -7 -26 3900.89  636.61
  -1  -7  25 2609.83  891.62
  -1   7  25 2475.00  970.28
  -1  -7  25 3347.24  932.60
  -1   7  25 2292.24  691.20
   1   7 -25 2076.74  490.55
   1   7 -25 1971.88 1293.82
   1  -7 -25 1815.81  721.08
  -1  -7  24  779.58  652.07
  -1   7  24 1634.31 1271.01
  -1  -7  24 2405.05  618.74
  -1   7  24 2529.10  905.23
   1   7 -24  787.54  373.79
   1   7 -24 3353.05  825.46
   1  -7 -24 1829.09  509.57
  -1  -7  23 5382.23 1758.77
  -1   7  23 4179.54 1478.95
  -1  -7  23 5456.61 1010.83
  -1   7  23 5841.93 1289.58
   1   7 -23 4770.45 1410.77
   1   7 -23 5407.21 2025.21
   1  -7 -23 5701.96  965.84
  -1  -7  22 3954.33 1096.11
  -1   7  22 4296.63 1307.73
  -1  -7  22 4303.48 1155.86
  -1   7  22 5325.07 1166.74
   1   7 -22 6182.79 1507.12
   1   7 -22 4992.46 1916.40
   1  -7 -22 6193.86 1183.20
  -1  -7  21 2500.90 1140.53
  -1   7  21 2325.99 1065.48
  -1  -7  21 3841.44 1698.02
  -1   7  21 3987.58 1105.89
   1   7 -21 4765.82 1078.16
   1   7 -21 5605.02 1034.88
   1  -7 -21 3838.13  780.04
  -1  -7  20  416.95  565.32
  -1   7  20  220.38  319.21
  -1  -7  20  415.69  429.19
  -1   7  20  899.46  545.32
   1   7 -20  504.56  281.30
   1   7 -20  784.67  405.27
   1  -7 -20  546.51  572.81
  -1  -7  19 6536.07 2607.53
  -1   7  19 5434.30 1067.30
  -1  -7  19 6511.59 1830.76
  -1   7  19 5125.07 1798.70
   1   7 -19 4929.96 1599.76
   1   7 -19 7994.07 1844.47
   1  -7 -19 6945.16  862.67
  -1  -7  18  646.51  462.07
  -1   7  18  445.36  421.12
  -1  -7  18  291.69  225.14
   1   7 -18  898.70  440.24
   1   7 -18 2140.09 1018.93
   1  -7 -18  605.09  436.66
  -1  -7  17 1126.63  521.53
  -1   7  17 2634.13  789.82
  -1  -7  17 1303.57  484.85
   1   7 -17  610.27  311.45
   1   7 -17 2886.42 1041.97
   1  -7 -17 1311.84  621.95
   1  -7 -16 1015.98  241.63
   1  -7 -16 1198.01  260.31
  -1  -7  16 1190.51  897.99
  -1   7  16 2163.83  649.14
  -1  -7  16 1680.81  469.50
  -1   7  16  782.20  382.55
   1   7 -16 2448.54  790.49
   1   7 -16 2456.29 1064.20
   1  -7 -16 1667.05  720.49
   1  -7 -15   30.88   66.54
   1  -7 -15  362.41  180.13
  -1  -7  15  221.39  666.46
  -1   7  15  281.33  275.52
  -1  -7  15  368.83  349.05
  -1   7  15  453.36  310.34
   1   7 -15  815.90  476.02
   1   7 -15  897.11  705.90
   1  -7 -15  230.24  494.50
   1  -7 -14 1430.17  465.89
   1  -7 -14 2125.66  494.59
  -1  -7  14 3198.35 1107.80
  -1   7  14 1922.65  576.41
  -1  -7  14 1623.63  416.49
  -1   7  14 1929.05  852.97
   1   7 -14 1480.55  498.59
  -1  -7  14 1760.99  405.25
   1   7 -14 2229.01 1038.27
   1  -7 -14 2170.62  665.22
   1  -7 -13  877.43  222.46
   1  -7 -13 1463.71  443.07
  -1  -7  13  979.59  720.62
  -1   7  13 1273.79  344.02
  -1  -7  13 1655.37  449.44
  -1   7  13  767.17  557.02
   1   7 -13 2140.81  673.65
  -1  -7  13 1026.14  323.64
   1   7 -13 2021.37  895.87
   1  -7 -13 2178.86  697.32
   1  -7 -12 9273.31  441.56
   1  -7 -12 9635.96  945.01
  -1  -7  1212440.82 2386.65
  -1   7  1211018.75 1102.05
  -1  -7  1211153.87  543.95
   1  -7 -12 8797.70  539.30
  -1   7  1211084.01  864.10
   1   7 -1210590.01 1230.08
  -1  -7  12 9626.35  409.08
   1   7 -1210506.03 2087.09
   1  -7 -1210496.26 1216.31
   1  -7 -1131705.37 1165.86
   1  -7 -1131940.03 1282.54
  -1  -7  1130561.56 1448.12
  -1   7  1130205.84 1190.36
  -1  -7  1131496.74 1125.46
   1  -7 -1131990.29 1059.53
  -1   7  1132023.89 1348.78
   1   7 -1131390.92 1250.21
  -1  -7  1131014.12 1179.06
   1   7 -1130167.39 1656.52
   1  -7 -1131616.06 1350.84
   1  -7 -1014682.17  589.92
   1  -7 -1014960.66 1530.51
  -1  -7  1017232.63 1837.57
  -1   7  1012731.86  566.27
  -1  -7  1014927.40  578.85
   1  -7 -1013507.55  444.17
  -1   7  1014779.63  870.16
   1   7 -1015500.44 1622.48
  -1  -7  1014310.62  542.65
   1   7 -1015500.89 1926.29
   1  -7 -1016174.75  836.52
   1  -7  -9 4879.28  431.34
   1  -7  -9 6397.81  857.81
  -1  -7   9 4289.94 1112.90
  -1   7   9 4101.08 1180.09
   1  -7  -9 4239.79  239.36
  -1  -7   9 4103.69  279.77
  -1   7   9 4511.81 1167.47
   1   7  -9 5933.64 1200.97
  -1  -7   9 4460.24  465.95
   1   7  -9 5302.56  985.30
   1  -7  -9 5538.14 2054.96
   1  -7  -814267.87  527.77
   1  -7  -816600.36  823.45
  -1   7   817166.64  748.76
   1  -7  -814843.18  344.07
  -1  -7   815979.14  376.53
   1   7  -816425.06  537.04
  -1   7   816016.50  924.14
   1   7  -815608.95 1476.74
  -1  -7   814549.31  617.31
   1   7  -817987.06 1245.47
   1  -7  -818963.88 1571.96
   1  -7  -714535.98  486.63
   1  -7  -715131.35  714.38
  -1  -7   719424.59 2509.03
  -1   7   716790.54  715.07
   1  -7  -714452.99  559.47
  -1  -7   714266.87  567.23
   1   7  -716987.80  601.74
  -1   7   716839.51  840.99
   1   7  -715717.02 1010.34
  -1  -7   714094.83 1058.01
   1   7  -717805.46 1911.40
   1  -7  -713031.33 1092.81
   1  -7  -619523.15 1106.36
  -1  -7   622576.14 1366.19
   1  -7  -622482.48 1053.96
  -1   7   623686.13 1256.19
   1  -7  -624272.41 1259.99
  -1  -7   622544.05  883.34
   1   7  -622527.58  968.07
  -1   7   623475.74 1338.30
   1   7  -624746.39 1573.88
  -1  -7   620880.97 1040.21
   1   7  -624326.96 1728.47
   1  -7  -622087.45 1213.63
   1  -7  -546768.35 1875.00
  -1  -7   553546.41 2325.91
   1  -7  -550033.79 2506.52
  -1   7   548068.80 1950.42
   1  -7  -549327.33 1986.16
  -1  -7   549223.50 1843.65
   1   7  -551014.27 2126.38
  -1   7   549346.69 2415.25
   1  -7  -549148.88 2000.76
   1   7  -550677.06 2071.53
  -1  -7   549592.50 2151.74
  -1   7   549840.60 2130.00
   1   7  -551282.84 2935.77
   1  -7  -4 5905.00  625.93
  -1  -7   4 7533.55 2262.31
   1  -7  -4 7146.48 1738.22
   1  -7  -4 5465.60  643.84
  -1  -7   4 5509.98  655.49
   1   7  -4 5961.78  505.99
   1  -7  -4 6607.83  742.01
  -1   7   4 5994.22  512.52
   1  -7  -4 4483.27 1139.25
   1   7  -4 5903.87 1246.86
  -1  -7   4 7202.22 1148.25
  -1   7   4 6405.72 2087.60
   1   7  -4 4165.74 1865.83
   1  -7  -330686.91 1351.62
  -1  -7   328946.35 1576.13
   1  -7  -333591.26 1501.84
   1  -7  -328254.15 1197.55
  -1  -7   332023.36 1253.71
   1   7  -330069.79 1176.17
   1  -7  -331534.11 1339.97
  -1   7   329959.32 1320.85
   1  -7  -328289.83 1260.68
   1   7  -329888.63 1339.16
  -1  -7   327772.83 1735.92
  -1   7   330403.69 1552.36
   1   7  -327179.45 1507.42
   1  -7  -2 2154.80  499.95
  -1  -7   2 2986.34 1446.96
   1  -7  -2 2325.64 1177.09
   1  -7  -2 2685.31  627.12
  -1  -7   2 2916.26  372.32
   1   7  -2 1964.99  570.30
   1  -7  -2 2637.66  797.89
  -1   7   2 3241.50  755.41
   1  -7  -2 2098.52  679.55
   1   7  -2 2704.14  814.44
  -1  -7   2 2814.84  687.12
  -1   7   2 3536.00 1275.89
   1   7  -2 2312.28  555.67
  -1  -7   142859.68 1988.49
   1  -7  -137305.29 1928.66
   1  -7  -134980.14 1419.21
  -1  -7   139934.39 1515.84
   1  -7  -139402.17 1644.28
   1   7  -135970.34 1492.61
  -1   7   137270.11 1514.65
   1   7  -139562.44 1700.82
   1  -7  -136534.94 1487.14
  -1  -7   136319.18 1619.70
  -1   7   137645.84 2579.99
   1   7  -143476.17 2034.91
  -1  -7   0 4551.79 1438.51
   1  -7   0 3338.63 1144.85
   1  -7   0 2823.73  644.81
  -1  -7   0 3208.62  303.70
  -1  -7   0 3380.77  186.50
   1  -7   0 4348.33  930.10
  -1   7   0 2733.96 1083.36
   1   7   0 3245.85 1182.39
   1  -7   0 3180.06  946.22
  -1  -7   0 3234.35  637.24
   1   7   0 3375.45 1028.13
  -1   7   0 2773.15  904.84
  -1  -7  -166071.73 1632.95
   1  -7   170187.32 2105.88
   1  -7   169528.83 1290.66
  -1   7  -164632.93 1270.67
  -1   7  -170431.75 1537.37
   1   7   171818.14 1581.65
   1  -7   168561.85 1331.73
   1   7   168097.11 2321.63
  -1   7  -171718.38 1759.71
  -1  -7  -270156.84 1602.04
   1  -7   270847.64 2384.71
   1  -7   265122.91 1387.04
  -1   7  -266598.41 1525.15
  -1   7  -263280.35 1418.05
   1   7   269310.17 2001.77
  -1  -7  -261793.41 2182.74
   1  -7   265980.29 1524.93
   1   7   269824.85 2366.73
  -1   7  -269988.46 2197.12
  -1  -7  -367402.46 2095.49
   1  -7   371027.14 1710.76
   1  -7   369379.60 1606.11
  -1   7  -368679.52 1349.86
  -1   7  -368929.60 1325.28
   1   7   369535.12 1856.58
   1  -7   369153.53 1319.04
   1   7   366837.51 1707.24
  -1   7  -371773.28 1994.06
  -1  -7  -419665.64 1113.67
   1   7   420489.35  896.11
   1  -7   420518.27 1067.85
   1  -7   420525.89  846.82
  -1   7  -419455.57  800.09
   1   7   420684.72 1549.66
  -1   7  -418860.54  793.33
   1  -7   419314.72  911.93
   1   7   421363.57 2406.52
  -1   7  -419926.07 1166.09
  -1  -7  -5 5886.98 1198.38
   1   7   5 4945.37  918.45
   1  -7   5 6004.56 1725.21
   1  -7   5 4934.35  486.47
  -1   7  -5 4860.78  410.83
   1   7   5 5532.17 1325.80
  -1   7  -5 5948.31  802.62
   1  -7   5 5378.76  754.33
  -1   7  -5 6400.41 1429.72
  -1  -7  -5 6520.03 2141.29
  -1  -7  -6 1365.77  603.82
   1   7   6 1263.71  254.76
   1  -7   6 1795.90 1059.72
   1   7   6 1678.85  336.04
   1  -7   6 1495.44  512.21
  -1  -7  -6 1365.97  246.30
  -1   7  -6 1264.32  452.60
   1   7   6 2094.89  593.08
  -1   7  -6 1126.59  312.60
   1  -7   6  864.67  203.61
  -1   7  -6 1103.10  447.64
  -1  -7  -6 1871.15 1031.53
  -1  -7  -730786.94 1390.63
   1   7   729052.07 1473.39
   1  -7   732871.21 1609.90
   1   7   728783.41 1337.51
   1  -7   728934.41 1434.76
  -1  -7  -729695.22 1178.38
   1   7   728980.17 1494.23
  -1   7  -730177.93 1189.71
   1  -7   728373.95 1202.55
  -1   7  -731161.42 1584.23
  -1  -7  -732375.78 1621.14
  -1  -7  -8 2732.37  753.71
   1   7   8 2991.03  664.39
   1   7   8 2710.05  406.03
   1  -7   8 2844.78  610.72
  -1  -7  -8 2723.40  294.18
   1   7   8 2691.60 1617.68
  -1   7  -8 2847.57  551.40
   1  -7   8 2697.44  363.40
  -1   7  -8 2848.32  821.60
  -1  -7  -8 3042.17  874.65
  -1  -7  -9  346.13  241.21
   1   7   9 -144.53  192.88
   1  -7   9 -105.92  629.29
   1   7   9  306.14  182.49
   1  -7   9 -253.82  243.97
  -1  -7  -9  -26.85   84.65
  -1   7  -9   68.05   29.33
   1   7   9  -36.56  443.38
  -1   7  -9 -181.42  144.26
  -1   7  -9 -824.56  623.59
  -1  -7  -9  350.80  782.21
  -1  -7 -10 -128.30  383.62
   1   7  10  235.94  213.39
   1  -7  10 1374.79  497.46
   1   7  10  475.27  356.67
   1  -7  10  292.59  226.42
  -1  -7 -10  378.18  124.02
  -1   7 -10  227.21  101.46
   1   7  10   98.59  399.44
  -1   7 -10  191.79  141.61
  -1   7 -10  770.33  642.68
  -1  -7 -10  479.12  634.89
  -1  -7 -11 1408.13  606.58
   1   7  11  571.61  222.34
   1  -7  11 1681.58  615.08
   1   7  11 1111.63  394.06
   1  -7  11 1426.57  505.05
  -1  -7 -11  817.31  209.17
  -1   7 -11  934.03  203.64
   1   7  11 1161.49  652.85
  -1   7 -11  468.38  293.01
  -1   7 -11 1756.25  701.57
  -1  -7 -11  663.86  564.23
  -1  -7 -12  138.42  187.75
   1   7  12 -127.20  157.83
   1  -7  12  662.57  478.38
   1   7  12  269.46  214.86
   1  -7  12  293.21  168.83
  -1  -7 -12  107.67   76.94
  -1   7 -12  -16.00  105.26
  -1   7 -12  220.58  183.84
  -1   7 -12  587.16  517.73
  -1  -7 -12 -278.62  554.72
   1   7  13 1190.10  259.00
   1  -7  13  955.16  566.83
   1   7  13  903.62  534.48
   1  -7  13 1383.21  316.83
  -1  -7 -13  374.26   99.03
  -1   7 -13  277.91  157.98
  -1   7 -13 1188.38  255.43
  -1  -7 -13  873.98  379.73
  -1  -7 -14  719.76  245.34
   1   7  14  160.36  114.22
   1  -7  14  364.71  541.46
   1   7  14   85.40  119.17
   1  -7  14 -172.18  296.37
  -1   7 -14  224.50  130.64
  -1   7 -14   48.76  173.73
  -1  -7 -14  550.14  338.08
  -1  -7 -15 2553.65  713.25
   1   7  15 2201.02  492.53
   1  -7  15 2030.86  828.93
   1   7  15 2026.92  941.37
   1  -7  15 4103.94  825.52
   1   7  15 1884.61  525.26
  -1   7 -15 2389.92  432.35
  -1   7 -15 2575.04  968.21
  -1  -7 -15 2765.60 1151.63
  -1  -7 -16 1632.87  523.71
   1   7  16 1457.90  382.92
   1  -7  16 2814.19 1120.09
   1   7  16 2716.61  648.97
   1  -7  16 2829.72  565.54
   1   7  16 2890.53  889.37
  -1   7 -16 1763.20  594.19
  -1   7 -16 2144.58  457.23
  -1  -7 -16 3660.94 1146.55
  -1  -7 -17 1144.29  431.53
   1   7  17 1123.66  290.89
   1  -7  17 1212.85  350.71
   1   7  17 1682.02  561.19
   1  -7  17 1963.06  529.75
   1   7  17 1202.06  415.88
  -1   7 -17 1415.69  280.26
  -1   7 -17 1474.00  499.26
  -1  -7 -17 1844.81  607.74
  -1  -7 -18  107.20   88.91
   1   7  18  313.28  103.06
   1  -7  18  571.51  303.17
   1   7  18  349.02  232.39
   1  -7  18  -10.33  364.13
   1   7  18 -873.38  696.24
  -1   7 -18  274.49  198.91
  -1   7 -18  801.54  529.29
  -1  -7 -18  -80.33  618.00
  -1  -7 -19 8422.72  270.38
   1  -7  1910278.51 2148.49
   1   7  19 8165.92 1925.61
   1  -7  19 9951.21  632.51
   1   7  19 9994.27 2236.04
  -1   7 -19 8154.28 1070.85
  -1   7 -1911285.85 3077.23
  -1  -7 -1912191.36 2397.84
   1  -7  20  667.62  588.77
   1   7  20 -166.41  407.48
   1  -7  20  494.78  242.09
   1   7  20  270.51  390.08
  -1   7 -20  395.97  170.92
  -1   7 -20 -755.11  821.63
  -1  -7 -20 1231.82  606.03
   1  -7  21 4451.07  844.08
   1   7  21 4691.59 1712.17
   1  -7  21 5429.29  758.76
   1   7  21 5753.05 1314.43
  -1   7 -21 4103.40  995.40
  -1   7 -21 4045.32 1134.91
  -1  -7 -21 5425.71 1071.36
   1  -7  22 2280.04  701.61
   1   7  22 2265.53  587.74
   1  -7  22 2265.23  742.91
   1   7  22 2352.00  753.89
  -1   7 -22 2309.63 1165.65
  -1   7 -22 2912.64 1032.10
  -1  -7 -22 3763.44  995.84
   1  -7  23 3634.11  883.63
   1   7  23 2066.75  881.14
   1  -7  23 3435.88  811.50
   1   7  23 2859.49  893.18
  -1   7 -23 2795.43  864.74
  -1   7 -23 1108.28  852.94
  -1  -7 -23 3144.11  691.20
   1  -7  24  105.81  564.47
   1   7  24 -566.09  522.95
   1  -7  24  314.95  361.65
   1   7  24  956.47  564.67
  -1   7 -24  403.23  190.29
  -1   7 -24  917.54  621.78
  -1  -7 -24 1339.20  475.78
   1  -7  25 6805.77 3012.08
   1   7  2512110.41  959.73
   1  -7  2510058.88  740.68
   1   7  2512059.57 2645.49
  -1   7 -25 6687.35 3310.88
  -1  -7 -2512724.85 1096.01
   1  -7  26 -136.91  568.11
   1   7  26  386.60  533.98
   1  -7  26  504.23  182.09
   1   7  26  237.89  317.75
  -1   7 -26  139.18  800.74
  -1  -7 -26  517.36  502.62
   1  -7  27  313.28  287.17
   1   7  27  242.89  275.32
   1  -7  27  755.88  576.08
   1   7  27  861.61  562.82
  -1  -7 -27  349.84  437.39
   1  -7  28  853.92  622.70
   1   7  28  639.44  502.15
   1  -7  28  236.19  429.83
   1   7  28 1490.97 1037.25
  -1   7 -28 1816.54 1025.03
  -1  -7 -28  891.84  769.11
   1  -7  29  901.01  537.22
   1   7  29 -300.98  483.00
   1  -7  29  157.16  489.73
   1   7  29 1129.84  604.32
  -1   7 -29  139.90  764.74
  -1  -7 -29 -188.13  567.55
   1  -7  30  665.74  335.07
   1   7  30 -165.90  486.98
   1  -7  30  633.90  276.03
   1   7  30  445.94  777.90
  -1   7 -30 -181.59  919.95
  -1  -7 -30  556.69  567.63
   1   7  31 2057.73  851.40
   1  -7  31 1936.50 1009.41
   1   7  31 3777.57 1114.25
  -1   7 -31 2382.20 2405.99
  -1  -7 -31 2327.24 1457.76
   1   7  32 3044.29 1508.43
   1  -7  32 4270.77 1484.70
   1   7  32 4273.91 1438.57
  -1   7 -32 3300.87 1800.26
  -1  -7 -32 3583.85 1890.34
   1   7  33 -272.42  458.49
   1  -7  33  851.80  561.58
   1   7  33 -175.30  568.01
   1   7  34  617.03  606.59
  -1   8  33 2053.36 1415.01
  -1  -8  33 2833.16 1533.09
  -1   8  33 3512.78 1906.84
   1   8 -33 6769.06 1824.64
   1  -8 -33 3136.60 1638.43
  -1   8  32  925.13 1376.59
  -1  -8  32 2881.22 1599.27
  -1   8  32 2210.48 1189.23
   1   8 -32 3429.51 1463.72
   1  -8 -32 3503.39 1492.18
  -1   8  31  624.47  651.31
  -1  -8  31  709.69  528.67
  -1   8  31 -852.06  632.15
   1   8 -31 2198.41 1050.15
   1  -8 -31  527.29  252.91
  -1  -8  30 3590.28 1673.65
  -1   8  30 3807.58  837.62
  -1  -8  30 3369.81 1410.36
  -1   8  30 3334.05 1159.76
   1   8 -30 2412.75 1126.05
   1  -8 -30 4575.70 1807.17
  -1  -8  29  915.02  479.89
  -1   8  29  977.51  491.16
  -1  -8  29 1511.91  764.04
  -1   8  29 1297.80  523.07
   1   8 -29 1302.22  933.92
   1  -8 -29 1576.68  481.18
  -1  -8  28  839.00  667.25
  -1   8  28  704.75  629.36
  -1  -8  28 -116.94  493.34
  -1   8  28  624.74  508.65
   1   8 -28 1037.54  557.52
   1  -8 -28  538.97  229.36
  -1  -8  27  545.96  527.76
  -1   8  27  616.35  603.46
  -1  -8  27  252.22  193.25
  -1   8  27  869.52  687.31
   1   8 -27  589.20  559.58
   1  -8 -27 -494.69  460.95
  -1  -8  26  478.40  360.22
  -1   8  26  311.46  618.80
  -1  -8  26  358.50  228.72
  -1   8  26 -205.58  626.68
   1   8 -26 -527.82  890.82
   1  -8 -26  779.61  335.13
  -1  -8  25  735.35  679.43
  -1   8  25 1180.34  828.13
  -1  -8  25  626.31  363.48
  -1   8  25 1303.40  573.18
   1   8 -25  450.05  381.49
   1   8 -25  329.14  504.90
   1  -8 -25  868.61  680.87
  -1  -8  24  472.52  540.56
  -1   8  24  667.30  522.31
  -1  -8  24  214.04  362.92
  -1   8  24 -433.77  631.13
   1   8 -24  284.15  380.26
   1   8 -24 1064.45  506.74
   1  -8 -24   63.09  287.26
  -1   8  23  816.34  794.64
  -1  -8  23  676.41  375.93
  -1   8  23 -710.62  567.27
   1   8 -23  225.44  235.42
   1   8 -23 -797.18  770.65
   1  -8 -23  256.75  252.65
  -1  -8  22 -605.94  588.65
  -1   8  22  136.90  217.81
  -1   8  22  -88.93  594.68
   1   8 -22   78.61  198.62
   1   8 -22 1221.12  754.00
   1  -8 -22   25.04  317.79
  -1  -8  21  983.16  673.25
  -1   8  21 1156.66  538.56
  -1  -8  21  469.61  242.20
   1   8 -21  909.44  627.27
   1   8 -21 1487.62  614.66
   1  -8 -21 1155.26  515.90
  -1  -8  2036508.96 1946.77
  -1   8  2035737.35 2047.74
  -1  -8  2037776.63 2495.78
   1   8 -2040179.24 1967.52
   1   8 -2039551.31 3646.00
   1  -8 -2039214.87 2805.50
  -1  -8  19 2618.04  761.44
  -1   8  19 2653.81  876.17
  -1  -8  19 1261.61  620.60
  -1   8  19  812.13  378.22
   1   8 -19 1211.46  812.41
   1  -8 -19 1906.21  590.56
  -1  -8  18 1002.79 1280.64
  -1   8  18 1802.06  517.49
  -1  -8  18  554.52  253.93
  -1   8  18  516.05  378.90
   1   8 -18  312.80  369.60
   1   8 -18  883.06 1005.40
   1  -8 -18 1324.86  539.11
   1  -8 -17  110.18   51.82
  -1  -8  17  576.16  434.35
  -1   8  17  511.32  469.86
  -1  -8  17  611.86  325.48
  -1   8  17  504.46  374.47
   1   8 -17  308.28  256.21
   1   8 -17 -124.12  408.86
   1  -8 -17  476.77  586.61
   1  -8 -16  477.30  171.66
   1  -8 -16  325.01  164.16
  -1  -8  16  196.75  345.13
  -1   8  16  106.21  451.89
  -1  -8  16  326.18  232.65
  -1   8  16 -361.88  661.50
   1   8 -16  817.66  403.41
   1   8 -16  895.21  730.23
   1  -8 -16  575.83  366.89
   1  -8 -15 6431.51  325.47
   1  -8 -15 7522.94  968.74
  -1  -8  15 6981.14 2027.66
  -1   8  15 6631.60 1331.62
  -1  -8  15 7467.92  629.34
  -1   8  15 6820.37 1495.71
   1   8 -15 7023.71 1770.03
   1   8 -15 5765.60 2065.04
   1  -8 -15 8334.07 2354.16
   1  -8 -14 6270.36  796.19
   1  -8 -14 7778.41 1016.18
  -1  -8  14 6948.23 2266.25
  -1   8  14 6802.68 1731.43
  -1  -8  14 7514.70  505.70
  -1   8  14 6630.12 1645.16
   1   8 -14 8205.31 2039.14
  -1  -8  14 7169.38  388.48
   1   8 -14 8101.42 2126.66
   1  -8 -14 8690.21 2655.74
   1  -8 -13 1773.89  451.07
   1  -8 -13 2921.96  607.63
  -1  -8  13 2722.38  909.32
  -1   8  13 3342.56  878.33
  -1  -8  13 3262.98  861.97
   1  -8 -13 2112.28  467.03
  -1   8  13 3792.88 1096.57
   1   8 -13 3318.24  864.67
  -1  -8  13 1598.25  455.61
   1   8 -13 3285.04  666.38
   1  -8 -13 3491.01  909.30
   1  -8 -12  820.74  306.04
   1  -8 -12 1151.31  548.19
  -1  -8  12 1048.13  507.58
  -1   8  12 1372.13  483.73
  -1  -8  12 1027.29  291.49
   1  -8 -12  698.56  151.56
  -1   8  12  576.32  647.22
   1   8 -12  892.12  553.76
  -1  -8  12  730.19  309.43
   1   8 -12  785.59  970.78
   1  -8 -12  856.25  641.87
   1  -8 -11 2699.65  871.30
   1  -8 -11 3045.19  631.31
  -1  -8  11 4504.91 1142.00
  -1   8  11 3150.04 1033.67
  -1  -8  11 2883.23  820.41
   1  -8 -11 2313.11  459.20
  -1   8  11 2759.05 1057.80
   1   8 -11 2845.38  801.64
  -1  -8  11 2091.42  491.95
   1   8 -11 2937.97 1372.08
   1  -8 -11 2163.34  766.22
   1  -8 -10  724.50  296.70
   1  -8 -10 1018.94  612.13
  -1  -8  10 1367.02  507.99
  -1   8  10  335.94  221.45
   1  -8 -10  610.09  149.83
  -1  -8  10  649.25  192.72
  -1   8  10  529.70  349.21
   1   8 -10  429.60  326.84
  -1  -8  10  526.21  167.70
   1   8 -10 1802.41  944.39
   1  -8 -10  557.03  239.85
   1  -8  -9 3387.88  891.17
   1  -8  -9 4781.76 1124.75
  -1   8   9 3544.47 1128.99
   1  -8  -9 3060.84  294.00
  -1  -8   9 3876.53  912.58
  -1   8   9 3786.62 1141.79
   1   8  -9 3812.21 1067.04
  -1  -8   9 3069.85  769.51
   1   8  -9 4713.58 1491.73
   1  -8  -9 3807.94  827.43
   1  -8  -8  391.25  256.34
   1  -8  -8  692.19  426.66
  -1  -8   8 1269.29  584.07
  -1   8   8  415.51  279.32
   1  -8  -8  122.37   99.60
  -1  -8   8  385.32  172.69
   1   8  -8  306.37  139.42
  -1   8   8 -489.53  482.58
   1   8  -8  599.17  315.86
  -1  -8   8   26.70  138.98
   1   8  -8 1693.87  505.08
   1  -8  -8  909.07  391.63
   1  -8  -7 4091.03  840.12
   1  -8  -7 4769.13 1095.36
  -1  -8   7 4875.44 1621.41
  -1   8   7 4417.10  567.53
   1  -8  -7 3347.58  354.24
  -1  -8   7 3815.67  591.78
   1   8  -7 4120.69  787.86
  -1   8   7 3145.90 1141.12
   1   8  -7 4430.27 1140.52
  -1  -8   7 4312.31  717.89
   1   8  -7 4988.55 1041.91
   1  -8  -7 4540.76  803.48
  -1  -8   6 2362.17 1008.45
   1  -8  -6 2597.72  667.52
   1  -8  -6 1627.15  382.24
  -1  -8   6 2143.01  533.65
   1   8  -6 1575.04  275.42
  -1   8   6 2069.98  624.08
   1   8  -6 1471.34  386.41
  -1  -8   6 2023.27  533.18
  -1   8   6 2336.39  588.87
   1   8  -6 1430.26  813.57
   1  -8  -5 1542.06  508.14
  -1  -8   5 2030.44  728.84
   1  -8  -5  711.86  169.28
  -1  -8   5 1446.82  372.53
   1   8  -5  903.99  269.27
   1  -8  -5 1208.59  401.94
  -1   8   5  298.89  383.19
   1   8  -5 1060.93  536.23
  -1  -8   5  873.28  644.24
  -1   8   5  377.24  292.34
   1   8  -5  844.96  657.62
   1  -8  -444266.76 2189.37
   1  -8  -441113.13 1016.78
  -1  -8   444891.97  909.52
   1   8  -441933.32  951.27
   1  -8  -445433.40 1299.87
  -1   8   446103.98 1257.41
   1   8  -443316.71 1460.97
  -1  -8   441057.61 1071.34
  -1   8   442879.64 2976.29
   1   8  -447651.74 1619.63
  -1  -8   3 1682.81  551.99
   1  -8  -3 1908.42  488.81
   1  -8  -3 1576.07  278.89
  -1  -8   3 1484.53  357.36
   1   8  -3  847.30  219.74
   1  -8  -3 1255.46  303.18
  -1   8   3 1459.65  473.81
   1   8  -3 1324.06  449.66
   1  -8  -3 1259.03  334.59
  -1  -8   3 1435.40  366.36
  -1   8   3  765.56  427.14
   1   8  -3  770.74  695.42
  -1  -8   237208.22 1395.22
   1  -8  -236396.96 1147.06
   1  -8  -233998.30 1617.56
  -1  -8   233132.41 1241.15
   1  -8  -235564.96  649.80
   1   8  -233647.63 1383.21
  -1   8   236065.10 1514.63
   1   8  -236067.25 1320.02
   1  -8  -232323.53 1471.79
  -1  -8   234263.10 1623.38
  -1   8   236533.73 1351.62
   1   8  -235252.21 1595.87
  -1  -8   116376.75 2849.13
   1  -8  -114091.10  829.51
   1  -8  -113679.37  654.29
  -1  -8   114843.45  336.65
   1  -8  -113465.55  704.23
  -1   8   115653.46  604.61
   1   8  -115603.92 1000.86
   1  -8  -114288.55  591.16
  -1  -8   114748.71  621.38
   1   8  -114651.51 2556.92
  -1   8   112865.59  904.90
  -1  -8   0110016.1 2687.92
   1  -8   0113354.1 2480.63
   1  -8   0103481.3 2194.71
  -1  -8   0108356.8 1926.25
  -1  -8   0108067.4 1893.66
   1  -8   0112335.3 2107.59
  -1   8   0109237.9 2202.28
   1   8   0107253.9 2354.00
   1  -8   0105229.3 2098.51
   1   8   0115909.4 2736.36
  -1   8   0105989.2 2479.42
  -1  -8  -1  478.39  344.93
   1  -8   1  208.37  479.80
   1  -8   1  124.35  157.90
  -1   8  -1  116.04   69.77
  -1   8  -1  436.71  275.18
   1   8   1  826.66  311.29
   1  -8   1  138.66  275.00
   1   8   1  233.63  568.91
  -1   8  -1  195.22  312.97
  -1  -8  -264387.40 2051.94
   1  -8   263404.19 1944.99
   1  -8   264468.83 1571.81
  -1   8  -262111.32 1395.99
  -1   8  -259582.04 1398.24
   1   8   257378.19 1949.15
   1  -8   257926.94 1600.95
   1   8   259480.13 1824.15
  -1   8  -265905.86 1842.65
  -1  -8  -315743.03 1076.12
   1  -8   315416.27  885.95
   1  -8   316016.95  597.31
  -1   8  -316480.80  838.32
   1   8   317886.80 1941.80
   1  -8   314913.43  765.65
  -1   8  -316088.57 2094.38
  -1  -8  -410170.84  685.48
   1  -8   411809.60  988.81
   1  -8   411299.01  885.27
  -1   8  -410555.81  411.75
   1   8   412076.39 1450.85
  -1   8  -411706.66  622.75
   1  -8   411807.31  563.97
  -1   8  -410354.13 1241.04
  -1  -8  -5 9649.23 1882.24
   1  -8   510178.34 2480.41
   1  -8   5 6746.08  544.50
  -1   8  -5 6482.66  409.97
   1   8   5 7004.22 2380.29
  -1   8  -5 6883.52  426.64
   1  -8   5 6790.01  458.42
  -1   8  -5 8769.42 1851.39
  -1  -8  -6 2700.35  635.15
   1  -8   6 1921.23 1151.64
   1  -8   6 1972.06  483.43
  -1  -8  -6 1385.34  235.46
   1   8   6 2168.01  980.70
  -1   8  -6 2390.11  466.08
   1  -8   6 2001.84  388.28
  -1   8  -6 2223.72  529.61
  -1  -8  -6 2847.05  838.83
  -1  -8  -7  403.49  429.66
   1  -8   7   74.87  431.25
   1   8   7   35.32   83.90
   1  -8   7  110.66  182.72
  -1  -8  -7  205.77   73.35
   1   8   7 -517.14  655.86
  -1   8  -7  243.48  158.51
   1  -8   7  119.58  108.87
  -1   8  -7 1192.18  572.16
  -1  -8  -7 1370.46  711.56
  -1  -8  -855484.28 2036.80
   1  -8   856901.67 2180.92
   1   8   853488.22 1717.87
   1  -8   851804.80 1733.63
  -1  -8  -856286.94 1782.38
   1   8   854415.61 2171.63
  -1   8  -853228.70 1769.61
   1  -8   851791.07 1633.67
  -1   8  -851706.24 2593.34
  -1  -8  -855597.78 2168.74
  -1  -8  -911575.71  941.44
   1   8   911918.85  602.20
   1  -8   914172.79  954.60
  -1  -8  -911061.64  281.88
   1   8   911341.09 1120.51
  -1   8  -912837.09  678.82
   1  -8   910354.06  471.11
  -1   8  -913219.13 1444.41
  -1  -8  -910639.31 1332.84
  -1  -8 -1081796.83 2963.65
   1  -8  1083808.28 2968.51
   1   8  1076221.14 2625.43
   1  -8  1082373.15 2713.42
  -1  -8 -1077369.22 2431.51
  -1   8 -1081055.08 2502.65
   1   8  1075915.43 2824.29
  -1   8 -1082935.72 2701.96
  -1   8 -1076496.78 3595.73
  -1  -8 -1081108.35 2862.20
  -1  -8 -11 4824.49 1142.47
   1   8  11 3303.31  408.84
   1  -8  11 3686.20 1438.77
   1   8  11 4115.71  541.39
   1  -8  11 4516.65  333.79
  -1  -8 -11 3762.33  472.88
  -1   8 -11 3527.51  572.54
   1   8  11 4705.10 1983.46
  -1   8 -11 5337.90  915.83
  -1   8 -11 6181.96 1880.88
  -1  -8 -11 4061.44  680.73
  -1  -8 -1225447.19 1107.37
   1   8  1224584.56  967.61
   1  -8  1223474.32 1152.70
   1   8  1224034.30  994.26
   1  -8  1226054.66 1031.42
  -1  -8 -1224140.60  792.69
  -1   8 -1223750.98  701.21
   1   8  1223389.06 1360.33
  -1   8 -1226304.93  831.83
  -1   8 -1225638.71 1381.96
  -1  -8 -1225372.83 1727.80
  -1  -8 -13   15.33  238.87
   1   8  13  -33.05  186.61
   1  -8  13  316.15  276.57
   1   8  13  570.66  240.58
   1  -8  13  116.57  153.20
  -1  -8 -13  179.21  206.23
  -1   8 -13   33.06   96.93
   1   8  13  979.41  888.12
  -1   8 -13   69.04  166.98
  -1   8 -13 1293.44  524.95
  -1  -8 -13  -32.74  627.78
  -1  -8 -1412621.30 1332.36
   1   8  1412726.13  487.77
   1  -8  1412264.20 1153.19
   1   8  1412171.81  593.68
   1  -8  1410984.25  506.45
  -1  -8 -1410876.22  399.65
  -1   8 -1410137.46  681.22
   1   8  1410538.46 1009.18
  -1   8 -1412066.53  602.16
  -1   8 -1412193.14 3173.63
  -1  -8 -1411844.77 1084.92
  -1  -8 -15 3084.17  729.15
   1   8  15 2558.87  342.02
   1  -8  15 2178.32  745.38
   1   8  15 2605.52  673.57
   1  -8  15 3128.35  850.80
  -1   8 -15 1662.81  492.93
  -1   8 -15 2401.40  470.60
  -1  -8 -15 3195.12  783.54
  -1  -8 -1612298.19  596.34
   1   8  1611759.40 1116.89
   1  -8  1613834.54 1168.94
   1   8  1612758.00  688.46
   1  -8  1612277.17  540.31
  -1   8 -1610999.97  539.68
  -1   8 -1611835.05  994.29
  -1  -8 -1613644.30 1290.74
  -1  -8 -17  164.74  173.50
   1  -8  17  218.39  370.03
   1   8  17  409.70  153.19
   1  -8  17  -98.50  318.86
   1   8  17 -133.83  721.65
  -1   8 -17  393.39  286.05
  -1  -8 -17  638.31  579.99
  -1  -8 -18 1920.61  589.43
   1  -8  18 2185.98 1068.68
   1   8  18 1802.46  374.68
   1  -8  18 2188.26  415.93
   1   8  18 2935.44  975.36
  -1   8 -18 1716.31  488.14
  -1  -8 -18 2500.96  588.09
   1  -8  19  925.22  402.36
   1   8  19  326.59  180.38
   1  -8  19  797.52  231.11
   1   8  19  503.15  443.87
  -1   8 -19 1168.67  368.13
  -1  -8 -19 1219.91  817.81
   1  -8  20 6234.81 1731.40
   1   8  20 4620.03 1358.20
   1  -8  20 7493.68 1496.52
   1   8  20 5275.02 1565.47
  -1   8 -20 3887.14 1076.52
  -1  -8 -20 5064.22 1394.19
   1  -8  21 2059.60  642.72
   1   8  21  821.36  434.99
   1  -8  21 1014.74  369.80
   1   8  21  744.77  472.49
  -1   8 -21  439.71  332.77
  -1   8 -21 1612.61 1357.14
  -1  -8 -21 1900.10  978.58
   1  -8  22 2187.53  801.15
   1   8  22 1915.82 1314.70
   1  -8  22 2112.11  436.33
   1   8  22 2219.75  692.09
  -1   8 -22 2892.47 1416.44
  -1  -8 -22 2807.71  639.90
   1  -8  23 1035.95  330.77
   1   8  23  233.96  223.43
   1  -8  23  369.73  236.42
   1   8  23  358.42  297.05
  -1   8 -23 1565.77  896.90
  -1  -8 -23 1204.85  505.02
   1  -8  24 3932.98 2148.11
   1   8  24 5225.41 1309.85
   1  -8  24 4497.21 1282.64
   1   8  24 5544.93 1268.22
  -1   8 -24 5416.65 2654.86
  -1  -8 -24 5624.82 1315.17
   1  -8  25  417.62  351.96
   1   8  25 -224.34  433.43
   1  -8  25  432.60  225.39
   1   8  25 1097.04  378.12
  -1   8 -25 1741.58  716.50
  -1  -8 -25   10.35  353.44
   1  -8  26 2829.07 1314.84
   1  -8  26  866.14  353.20
   1   8  26 1797.09  510.20
  -1   8 -26  169.75  502.08
  -1  -8 -26 1562.70  459.20
   1  -8  27  969.59  712.32
   1   8  27 -256.39  406.28
   1  -8  27  339.62  454.18
   1   8  27 1657.61  991.66
  -1   8 -27 1684.78 1415.88
  -1  -8 -27  885.77  537.84
   1  -8  28   72.36  221.16
   1  -8  28  750.19  334.17
   1   8  28 -968.14  668.35
  -1   8 -28  834.86  556.09
  -1  -8 -28  445.16  555.68
   1  -8  29  625.76  392.67
   1   8  29  477.58  415.48
   1  -8  29   79.60  218.81
   1   8  29  608.30  751.61
  -1   8 -29  275.96 1123.59
  -1  -8 -29 1114.23  798.42
   1  -8  30  544.01  650.11
   1   8  30  160.62  248.67
   1  -8  30  373.85  334.10
   1   8  30  237.21  467.54
  -1   8 -30  410.07  656.92
  -1  -8 -30  417.88  598.36
   1  -8  31 1168.28  648.51
   1   8  31 3522.01  767.09
  -1   8 -31 1203.23  742.49
  -1  -8 -31 1024.63  774.96
   1  -8  32 1242.82  591.95
   1   8  32 1693.74  684.31
  -1   8 -32 1614.88 1139.26
  -1  -8 -32 1890.46  887.16
  -1  -9  32  800.66  285.45
  -1   9  32  558.80  504.74
   1   9 -32  652.90  873.61
   1  -9 -32   68.53  651.85
  -1  -9  31  667.93  689.84
  -1  -9  31  946.24  797.06
  -1   9  31 1111.06  442.19
   1   9 -31  530.37  915.10
   1  -9 -31 1815.03  537.64
  -1  -9  30  449.79  373.53
  -1   9  30 1718.44  878.42
  -1  -9  30 1374.01 1361.32
  -1   9  30 2958.50 1049.96
   1   9 -30 1183.08 1033.98
   1  -9 -30 2657.76 1207.73
  -1  -9  29  801.16  669.72
  -1   9  29  344.60  473.96
  -1  -9  29  246.77  447.40
  -1   9  29  681.51  654.57
   1   9 -29  686.48 1189.73
   1  -9 -29 -157.29  559.87
  -1  -9  28 1795.04 1316.79
  -1   9  28 1105.52  640.05
  -1  -9  28 1814.55  912.41
  -1   9  28 1611.40 1029.59
   1   9 -28 1582.34 1141.06
   1  -9 -28 2416.16 1358.75
  -1  -9  27 2310.80  763.69
  -1   9  27 1577.95  622.54
  -1  -9  27  905.06  399.08
  -1   9  27  913.31  579.66
   1   9 -27 2483.30 1130.39
   1  -9 -27 1569.69  701.96
  -1  -9  26 4770.51 2663.78
  -1   9  26 5319.42 2521.76
  -1  -9  26 6215.95 1960.50
  -1   9  26 5369.76 1715.97
   1   9 -26 5761.40 2075.85
   1  -9 -26 6572.78 1635.46
  -1  -9  25 4030.58 2055.02
  -1   9  25 3866.78 1098.78
  -1  -9  25 4361.60 1704.32
  -1   9  25 3106.41 1209.52
   1   9 -25 4539.58 1280.37
   1  -9 -25 5219.05  966.52
  -1  -9  24 4656.79 1672.28
  -1   9  24 3719.44 1393.53
  -1  -9  24 4377.74 1105.18
   1   9 -24 5569.40 1628.03
   1  -9 -24 5696.30 1945.34
  -1  -9  23  990.81  742.52
  -1   9  23  558.70  646.28
  -1  -9  23  726.48  318.80
   1   9 -23  854.35  387.78
   1   9 -23  791.48  311.94
   1  -9 -23  455.59  349.37
  -1  -9  22  161.97  392.78
  -1   9  22 1222.97  483.95
  -1  -9  22  665.03  326.30
  -1   9  22  795.52  354.01
   1   9 -22  275.17  198.13
   1   9 -22  -42.26  772.55
   1  -9 -22   -7.06  461.65
  -1  -9  21 -494.24  682.04
  -1   9  21  647.81  398.55
  -1  -9  21  322.32  319.42
  -1   9  21  482.17  382.77
   1   9 -21  636.84  306.74
   1   9 -21  248.76  759.81
   1  -9 -21  305.55  211.14
  -1  -9  2017727.80 1428.97
  -1   9  2016739.55 1184.05
  -1  -9  2017339.70 1364.32
  -1   9  2017398.29 3960.61
   1   9 -2016759.76 2251.97
   1   9 -2017005.47 1643.55
   1  -9 -2020641.85 2116.34
  -1  -9  19 -226.76  803.50
  -1   9  19  520.30  248.45
  -1  -9  19  475.61  299.39
  -1   9  19 -143.07  330.63
   1   9 -19  259.19  235.54
   1   9 -19   89.14  548.49
   1  -9 -19  571.59  399.33
  -1  -9  18 4491.21 1922.02
  -1   9  18 4070.83 1366.76
  -1  -9  18 4417.75  825.27
  -1   9  18 3711.42  864.62
   1   9 -18 4649.95  856.15
   1   9 -18 4651.39  820.03
   1  -9 -18 5167.17 1475.36
   1  -9 -17 2928.23  560.24
  -1  -9  17 3649.84 1864.66
  -1   9  17 4356.34  917.58
  -1  -9  17 4761.76 1318.80
  -1   9  17 4760.52 1455.52
   1   9 -17 3311.33  735.31
   1   9 -17 3691.24 1282.81
   1  -9 -17 4333.50 1193.60
   1  -9 -16 1064.17  318.87
  -1  -9  16 -838.34  901.92
  -1   9  16  281.22  272.24
  -1  -9  16  236.77  156.09
  -1   9  16  601.63  642.80
   1   9 -16  660.03  608.14
   1   9 -16  958.25 1100.66
   1  -9 -16 -106.47  619.97
   1  -9 -15  194.02  256.78
  -1  -9  15  561.55  643.06
  -1   9  15  100.49  268.85
  -1  -9  15  512.16  289.52
  -1   9  15 1064.81  545.34
   1   9 -15  548.97  440.82
   1   9 -15  621.01  528.99
   1  -9 -15  512.76  333.28
   1  -9 -1416523.80 1237.66
  -1  -9  1418215.09 1442.27
  -1   9  1415894.37  923.01
  -1  -9  1415035.37 1031.37
  -1   9  1418226.54 1453.01
   1   9 -1416325.45 1849.03
  -1  -9  1416185.48  756.65
   1   9 -1417789.88 1444.69
   1  -9 -1417953.63 2751.22
   1  -9 -13 3109.94  800.97
   1  -9 -13 4991.44 1058.39
  -1  -9  13 6359.33 1730.55
  -1   9  13 4979.06  577.48
  -1  -9  13 4949.81  985.48
   1  -9 -13 4572.53  209.58
  -1   9  13 4954.22 1345.29
   1   9 -13 4125.01 1294.25
  -1  -9  13 3977.96  541.73
   1   9 -13 3390.13  953.17
   1  -9 -13 6523.56 1369.07
   1  -9 -1227533.18 1393.52
  -1  -9  1226322.82 1839.86
  -1   9  1224190.83 1239.05
  -1  -9  1226035.50 1161.16
   1  -9 -1222516.39  897.66
  -1   9  1223257.87 1422.08
   1   9 -1224595.85 1644.78
  -1  -9  1223806.95 1290.73
   1   9 -1227438.91 2661.58
   1  -9 -1225248.75 1727.33
   1  -9 -11  116.40  232.24
   1  -9 -11 1062.37  522.66
  -1  -9  11-1018.38  662.13
  -1   9  11    4.29  195.72
  -1  -9  11  269.21  192.33
   1  -9 -11  183.79   66.63
  -1   9  11  230.05  356.85
   1   9 -11 -135.51  393.34
  -1  -9  11    3.98  147.17
   1   9 -11  657.67  432.07
   1  -9 -11  630.31  665.98
   1  -9 -10 7711.97  855.88
  -1   9  10 6640.98  890.85
  -1  -9  10 7476.62  785.79
   1  -9 -10 6192.32  364.51
  -1   9  10 7227.11 2165.00
   1   9 -10 7587.36  848.97
  -1  -9  10 6567.98  747.87
   1   9 -10 6751.77  888.94
   1  -9 -10 7483.45 2115.91
   1  -9  -9  168.81  416.02
  -1  -9   9  292.47  648.20
  -1   9   9  -60.04  242.34
   1  -9  -9  214.21  133.99
  -1  -9   9  -14.43  215.19
  -1   9   9  414.05  655.46
   1   9  -9  160.28  451.05
  -1  -9   9 -135.48  155.05
   1   9  -9 1120.99  510.03
   1  -9  -9  588.72  502.60
   1  -9  -8  517.02  360.66
  -1  -9   8   -1.23  610.36
  -1   9   8  421.33  372.69
   1  -9  -8  401.58  109.24
  -1  -9   8  452.73  187.29
  -1   9   8  362.93  344.17
   1   9  -8  -11.96  399.65
  -1  -9   8  236.46  198.90
   1   9  -8 -465.81  691.54
   1  -9  -8  351.52  454.47
   1  -9  -7  284.12  431.50
  -1  -9   7 -398.08  704.31
   1  -9  -7  184.86  118.17
  -1  -9   7    4.41  121.55
   1   9  -7   63.15  149.55
   1  -9  -7   91.46   78.93
  -1   9   7 -278.38  477.41
   1   9  -7  225.87  300.59
  -1  -9   7  164.10  198.67
   1   9  -7  552.82  573.40
   1  -9  -7  259.07  711.80
   1  -9  -612191.72  629.13
  -1  -9   612495.84  960.93
   1  -9  -612555.07  535.37
  -1  -9   612366.87  454.37
   1   9  -611751.15 1053.42
   1  -9  -613649.96  919.33
  -1   9   611881.70 1581.17
   1   9  -613706.79  834.29
  -1  -9   612853.27  516.66
  -1   9   612819.24  768.74
   1   9  -612580.38 1003.03
   1  -9  -5  263.28  231.72
  -1  -9   5 1263.77  823.68
   1  -9  -5  307.95  146.89
  -1  -9   5  211.17   96.42
   1   9  -5  388.57  248.00
   1  -9  -5  324.35  120.21
  -1   9   5  580.69  346.95
   1   9  -5  180.50  187.43
  -1  -9   5   50.02  109.21
  -1   9   5  766.78  589.14
   1   9  -5  633.72  459.67
  -1  -9   410822.23 2381.57
   1  -9  -4 6974.30  595.97
   1  -9  -4 7071.30  429.63
  -1  -9   4 7574.12  451.23
   1  -9  -4 7794.59  381.07
   1   9  -4 7207.32  335.74
  -1   9   4 7524.69  750.56
   1   9  -4 6703.01  563.51
  -1  -9   4 6346.14  929.36
  -1   9   4 7472.21 1997.02
   1   9  -4 6780.76 2400.85
  -1  -9   3 1076.66  939.63
   1  -9  -3  699.58  538.47
   1  -9  -3  588.14  201.96
  -1  -9   3  376.70   91.27
   1  -9  -3  172.33  160.74
   1   9  -3  126.69  131.56
  -1   9   3  671.25  368.60
   1   9  -3  192.86  195.50
  -1  -9   3  362.70  211.52
  -1   9   3  158.90  512.40
   1   9  -3  460.75  307.11
  -1  -9   2 2349.50 1524.12
   1  -9  -2 2420.69 1059.62
   1  -9  -2 1719.72  372.06
  -1  -9   2 1819.60  253.50
   1  -9  -2 1496.23  283.86
   1   9  -2 1651.63  359.12
  -1   9   2 2365.72  551.71
   1   9  -2 2042.61  443.50
   1  -9  -2 1848.73  304.72
  -1   9   2  880.68  460.29
   1   9  -2 2417.05  850.22
  -1  -9   1  792.33  497.60
   1  -9  -1  752.91  533.60
  -1  -9   1  586.34  171.75
   1  -9  -1  691.85  248.20
  -1  -9   1  567.47  133.04
   1  -9  -1 1088.09  309.26
  -1   9   1  883.57  492.32
   1   9  -1  752.71  247.20
   1  -9  -1  672.55  253.49
   1   9  -1 -173.24  724.86
  -1   9   1 1247.58 1195.88
  -1  -9   0 4261.06 1146.82
   1  -9   0 2968.98  868.32
   1  -9   0 2559.27  530.60
  -1  -9   0 1973.41  278.48
  -1  -9   0 2165.05  252.08
   1  -9   0 2711.74  631.05
  -1   9   0 2301.88  431.54
   1   9   0 2877.43  601.50
   1  -9   0 1542.90  673.21
   1   9   0 1712.66 1205.32
  -1   9   0 2278.87  817.91
  -1  -9  -1  566.97  473.05
   1  -9   1  595.77  371.61
   1  -9   1  740.73  227.51
  -1   9  -1  552.05  409.68
   1   9   1  600.98  640.13
   1  -9   1  209.44  185.96
   1   9   1 1135.14  818.71
  -1   9  -1  904.10  698.25
  -1  -9  -233780.45 1482.33
   1  -9   233939.73 3404.53
   1  -9   232201.40 1215.71
  -1   9  -229521.62 1396.01
  -1   9  -232189.05 1181.22
   1   9   230608.01 1760.81
   1  -9   230535.21 1246.13
  -1   9  -234365.30 2635.86
  -1  -9  -3  183.30  427.18
   1  -9   3 -122.47  707.95
   1  -9   3 1058.75  286.44
  -1   9  -3  840.72  225.44
  -1   9  -3  675.53  451.55
   1   9   3 1038.42  290.74
   1  -9   3  765.57  276.26
  -1   9  -3  270.59  535.95
  -1  -9  -425337.35 1344.78
   1  -9   424059.70 1480.90
   1  -9   422491.49 1067.15
  -1   9  -421397.56 1036.58
  -1   9  -421696.81 1083.05
   1   9   423058.71 2423.60
   1  -9   421516.97 1185.61
  -1   9  -424044.11 2463.19
  -1  -9  -5  988.36  297.01
   1  -9   5 1747.05  496.05
   1  -9   5  933.95  290.37
  -1   9  -5  770.27  368.31
   1   9   5  636.31  455.01
  -1   9  -5 1566.28  423.10
   1  -9   5  790.36  232.56
  -1   9  -5  488.02  651.74
  -1  -9  -615005.25 1058.94
   1  -9   613814.41  960.43
   1  -9   614950.34  712.90
   1   9   613042.03 2063.06
  -1   9  -612441.94  846.20
   1  -9   611918.38  680.44
  -1   9  -616620.96 3298.19
  -1  -9  -615380.18 1439.23
  -1  -9  -7   84.21  345.98
   1  -9   7  279.78  633.75
   1  -9   7   27.89  157.49
   1   9   7   60.53  432.93
  -1   9  -7  109.75  139.39
   1  -9   7   76.83   93.85
  -1   9  -7  891.50  649.04
  -1  -9  -7  576.14  360.53
  -1  -9  -8 5853.23 1183.10
   1  -9   8 5400.79 1757.20
   1   9   8 4235.55  508.05
   1  -9   8 3707.55  317.52
   1   9   8 4253.46 1883.97
  -1   9  -8 5437.12  708.13
   1  -9   8 4230.51  350.18
  -1   9  -8 5307.20 1414.91
  -1  -9  -8 6264.91 2097.02
  -1  -9  -9  170.22  533.05
   1   9   9  493.65  164.02
   1  -9   9 1460.34  388.18
  -1  -9  -9  949.99  240.16
   1   9   9 2142.16 1136.16
  -1   9  -9 1139.24  231.22
   1  -9   9  481.95  146.83
  -1   9  -9  720.17  857.90
  -1  -9  -9  877.08  708.73
  -1  -9 -10  694.00  531.73
   1   9  10  154.55  211.58
   1  -9  10  402.82  216.04
  -1  -9 -10  306.09  120.25
   1   9  10  537.31  948.21
  -1   9 -10  236.23   88.46
  -1   9 -10  496.99  506.87
  -1  -9 -10   13.08  331.77
  -1  -9 -11  235.53  376.44
   1  -9  11 -964.64  775.44
   1   9  11  325.60  257.62
   1  -9  11 -281.09  269.95
  -1  -9 -11 -245.97  121.06
  -1   9 -11    2.42   46.93
   1   9  11  855.24  603.73
  -1   9 -11  -53.55  143.63
  -1   9 -11  210.59  443.52
  -1  -9 -11  555.41  497.18
  -1  -9 -12109963.9 3350.50
   1  -9  12108897.0 3457.47
   1   9  12106369.3 3071.53
   1  -9  12111454.4 3148.87
  -1  -9 -12107354.6 3031.81
  -1   9 -12110021.1 3036.23
  -1   9 -12109510.3 3153.53
  -1   9 -12119558.6 3929.64
  -1  -9 -12104302.9 3404.75
  -1  -9 -13 2368.61  582.70
   1  -9  13 3092.90 1213.80
   1   9  13 1442.35  361.12
   1  -9  13 1231.11  293.05
  -1  -9 -13 1056.75  203.87
  -1   9 -13 1085.43  345.08
   1   9  13 2018.44 1231.59
  -1   9 -13 2298.29  574.92
  -1   9 -13 2252.11 1121.67
  -1  -9 -13 2733.37  670.29
  -1  -9 -14 3696.64 1104.68
   1  -9  14 6998.81 1572.94
   1   9  14 4537.73 1274.74
   1  -9  14 5978.53 1276.54
  -1   9 -14 4314.27  631.86
   1   9  14 4611.90 1915.37
  -1   9 -14 4967.04  734.31
  -1   9 -14 5536.69 2338.32
  -1  -9 -14 6354.13  975.53
  -1  -9 -1510007.32 1354.35
   1  -9  15 8975.93 1993.83
   1   9  15 9155.25 1234.93
   1  -9  15 9477.37  494.07
   1   9  15 9554.34 3357.95
  -1   9 -15 8861.19  723.92
  -1   9 -1511136.28 3997.94
  -1  -9 -1511968.09 1753.80
  -1  -9 -16  579.49  273.68
   1  -9  16 -404.77  827.71
   1   9  16  999.25  523.92
   1  -9  16 1650.70  389.89
   1   9  16  721.33  614.79
  -1   9 -16 1428.15  413.64
  -1  -9 -16 1088.30  910.52
  -1  -9 -17  228.62  189.30
   1  -9  17 1205.95  510.02
   1   9  17  364.03  264.12
   1  -9  17  -59.77  326.09
   1   9  17 -352.00  815.26
  -1   9 -17   31.34   53.45
  -1  -9 -17  107.52  468.93
   1  -9  1813455.27 2608.16
   1   9  18 7943.10 1622.46
   1  -9  1810002.67  681.04
  -1   9 -18 8795.00 1105.15
  -1  -9 -18 9988.46 1348.99
   1  -9  19 -360.95  782.88
   1   9  19  441.81  342.00
   1  -9  19  403.25  222.56
  -1   9 -19  126.44  152.31
  -1  -9 -19  227.08  292.65
   1  -9  2031443.74 2091.35
   1   9  2025230.30 1442.10
   1  -9  2028673.73 1557.58
   1   9  2028740.39 2049.94
  -1  -9 -2030956.69 2254.42
   1  -9  21 1730.14 1050.59
   1   9  21  723.15  520.51
   1  -9  21  901.72  371.51
   1   9  21 1837.98  609.37
  -1  -9 -21 2167.58  588.51
   1  -9  22 1170.95  490.66
   1   9  22 1349.20  345.98
   1  -9  22 1742.20  502.98
   1   9  22-1014.01  810.81
  -1   9 -22  898.61  492.88
  -1  -9 -22 1882.59  491.61
   1  -9  23  989.91  556.46
   1   9  23  518.79  331.76
   1  -9  23  751.52  338.68
   1   9  23 1162.61  647.08
  -1   9 -23 1334.71  868.26
  -1  -9 -23 1331.34  380.57
   1  -9  24  -92.82  596.44
   1   9  24  489.57  176.44
   1  -9  24  483.65  162.25
   1   9  24  396.22  379.68
  -1   9 -24 1099.77  502.87
  -1  -9 -24 -515.36  551.29
   1  -9  25  566.89  355.85
   1   9  25  721.70  412.31
   1  -9  25  724.93  359.01
   1   9  25 1366.90  766.27
  -1   9 -25 1589.62  497.19
  -1  -9 -25 2116.70  574.20
   1  -9  2623495.45 2827.96
   1   9  2620876.17  816.23
   1  -9  2622180.52 2008.10
   1   9  2626623.14 3978.09
  -1   9 -2617997.52 4761.97
   1  -9  27  631.63  582.26
   1   9  27  332.25  163.11
   1  -9  27  268.26  278.95
   1   9  27  853.11  347.49
  -1   9 -27 -663.71 1117.49
  -1  -9 -27  476.18  588.91
   1  -9  28 2730.48 1326.61
   1  -9  28 4147.38 1296.52
   1   9  28 4431.20  711.26
  -1   9 -28 3687.97  949.32
  -1  -9 -28 4348.45 1917.60
   1  -9  29   79.41  239.45
   1  -9  29  274.84  715.65
   1   9  29 -706.86  763.10
  -1   9 -29  955.97  665.28
  -1  -9 -29  509.75  453.36
   1  -9  30  799.98  538.04
   1  -9  30  732.62  622.07
   1   9  30 1104.56  349.24
  -1   9 -30 1812.23 1238.25
  -1  -9 -30 -475.53  602.89
   1  -9  31   12.18  508.33
   1  -9  31  529.61  544.04
   1   9  31  647.29 1130.02
  -1   9 -31 2180.40 1180.20
  -1  -9 -31  682.96  401.23
  -1 -10  32 2254.38 1073.53
   1 -10 -32 1889.36  675.98
  -1 -10  31  724.25  306.95
  -1 -10  31 -281.37  597.37
  -1  10  31  468.03  292.88
   1  10 -31  543.80  536.50
   1 -10 -31  359.65  316.80
  -1 -10  30  643.76  421.02
  -1 -10  30  793.00  500.63
  -1  10  30  472.43  347.51
   1  10 -30  251.44  460.12
   1 -10 -30 1398.01  917.50
  -1 -10  29 3065.95 1534.63
  -1 -10  29 1559.92 1623.87
  -1  10  29 1743.27  679.47
   1  10 -29 5165.99 2037.26
   1 -10 -29 3025.04 1401.55
  -1 -10  28 2565.45 1843.53
  -1 -10  28 2558.43 1230.05
  -1  10  28 3294.18  902.97
   1  10 -28 1857.97 1590.42
   1 -10 -28 3644.55 1477.48
  -1 -10  27  104.12  392.07
  -1 -10  27  -47.59  330.99
  -1  10  27 -339.02  733.77
   1  10 -27 -924.80  898.98
   1 -10 -27  880.17  581.41
  -1 -10  26 4266.63 1416.45
  -1 -10  26 3928.77 1823.07
   1  10 -26 4754.40 2062.51
   1 -10 -26 6167.32 1445.49
  -1 -10  25 6844.96 3425.76
  -1  10  25 5622.50 1684.04
  -1 -10  25 8700.94 2699.76
  -1  10  25 8241.18 2244.12
   1  10 -25 8933.13 3237.65
   1 -10 -2512285.82 1178.71
  -1 -10  24 2734.08 1390.70
  -1  10  24 1789.86  660.89
  -1 -10  24 1590.24  510.46
  -1  10  24 1307.83  961.01
   1  10 -24 1523.78 1313.96
   1 -10 -24 2537.03  570.22
  -1 -10  23  764.14  668.00
  -1  10  23 1836.55  641.12
  -1 -10  23 2093.68  510.34
  -1  10  23 1257.98  451.84
   1  10 -23 1027.18  697.22
   1 -10 -23 1327.83  348.66
  -1 -10  22 8977.66 3161.77
  -1  10  22 9383.87 2115.05
  -1 -10  22 9367.66  829.49
  -1  10  2212040.62 2685.79
   1  10 -22 8785.04 3591.61
   1 -10 -2213632.27 1543.01
  -1 -10  21  759.70  783.68
  -1  10  21  -68.89  413.82
  -1 -10  21  101.73  189.87
  -1  10  21  531.99  308.24
   1  10 -21  943.53  554.37
   1 -10 -21  145.84  390.36
  -1 -10  20 1620.78  900.23
  -1  10  20 1883.84  643.12
  -1 -10  20 1961.09  565.41
  -1  10  20 1210.78  443.99
   1  10 -20  477.43  467.38
   1  10 -20 3384.30 1211.54
   1 -10 -20 1555.53  405.00
  -1 -10  19  557.61  459.62
  -1  10  19   96.44  176.47
  -1 -10  19  434.12  167.25
  -1  10  19 1239.93  609.89
   1  10 -19  734.66  698.61
   1  10 -19 1281.70  863.15
   1 -10 -19  785.21  568.72
  -1 -10  18 8404.00 2743.03
  -1  10  18 6964.85  959.15
  -1 -10  18 8021.36  811.25
  -1  10  18 7815.54 2417.70
   1  10 -18 8108.58 1859.27
   1  10 -18 7634.54 1886.50
   1 -10 -18 7765.51 2189.61
  -1 -10  17  231.70  606.84
  -1  10  17  562.65  346.76
  -1 -10  17  634.80  288.47
  -1  10  17 -330.24  684.44
   1  10 -17  663.79  359.38
   1  10 -17  298.44  441.82
   1 -10 -17  436.01  367.56
   1 -10 -16  188.55  256.09
  -1 -10  16 1451.70  911.24
  -1  10  16  388.96  301.19
  -1 -10  16  332.69  248.83
  -1  10  16  265.16  621.37
   1  10 -16   -1.48  344.91
   1  10 -16 2275.47  789.92
   1 -10 -16   94.17  504.78
   1 -10 -15  288.66  156.52
  -1 -10  15  900.96  618.11
  -1  10  15  -10.47  327.84
  -1 -10  15 1311.87  300.28
  -1  10  15  221.93  479.19
   1  10 -15  615.83  440.88
   1  10 -15 1591.40 1017.29
   1 -10 -15 1332.68  764.36
   1 -10 -14 2582.04  874.36
  -1 -10  14 4136.48 1591.93
  -1  10  14 3470.30  923.78
  -1 -10  14 4076.03 1057.23
  -1  10  14 2757.99 1046.25
   1  10 -14 4356.42  940.58
   1  10 -14 5966.27 1031.12
   1 -10 -14 3968.70  865.80
   1 -10 -13 6369.01 1356.94
  -1 -10  13 8175.57 3470.91
  -1  10  13 7386.23 1230.69
  -1 -10  13 5416.64  460.95
  -1  10  13 6072.90 2053.00
   1  10 -13 5627.15  708.47
   1  10 -13 5950.73 1354.38
   1 -10 -13 7253.09 1098.55
   1 -10 -12  351.67  298.65
  -1 -10  12  958.13  684.14
  -1  10  12  958.62  396.11
  -1 -10  12  155.75  125.51
   1 -10 -12  623.04  141.84
  -1  10  12  491.20  420.46
   1  10 -12 1068.58  637.63
  -1 -10  12  175.69   91.47
   1  10 -12 1030.85  923.38
   1 -10 -12 1536.68  513.81
   1 -10 -11 5438.41 1206.01
  -1 -10  11 4831.93 1481.95
  -1  10  11 4117.55  999.68
  -1 -10  11 4884.26 1194.76
   1 -10 -11 3852.11  395.58
  -1  10  11 4189.56 1610.18
   1  10 -11 5937.03 1098.82
  -1 -10  11 3088.40  379.26
   1  10 -11 5547.60 1428.66
   1 -10 -11 5013.65 1212.93
   1 -10 -10  668.47  473.91
  -1 -10  10 1458.79  713.32
  -1  10  10  845.83  292.16
  -1 -10  10  748.22  237.42
   1 -10 -10  523.77  134.99
  -1  10  10  768.93  490.75
   1  10 -10  624.70  572.05
  -1 -10  10  611.46  286.19
   1  10 -10 1172.00  712.63
   1 -10 -10  607.56  372.22
   1 -10  -9  451.81  253.84
  -1 -10   9  139.37  454.44
  -1  10   9  103.34  188.80
  -1 -10   9  234.09  176.05
   1 -10  -9  114.59   58.79
  -1  10   9  -72.45  597.01
   1  10  -9  866.30  368.56
  -1 -10   9  105.70  124.17
   1  10  -9 -264.58  725.03
   1 -10  -9 -216.79  696.47
   1 -10  -8  314.25  234.75
  -1 -10   8 -376.95  657.56
   1 -10  -8   83.22   54.20
  -1 -10   8  120.90  108.79
   1 -10  -8  139.26  124.91
  -1  10   8 -140.51  489.14
   1  10  -8  303.10  390.75
  -1 -10   8  -55.29  187.17
   1  10  -8  784.13  868.31
   1 -10  -8  136.45  392.93
   1 -10  -7 3590.28 1248.17
  -1 -10   7 3425.67  843.54
   1 -10  -7 1994.80  454.46
  -1 -10   7 2964.24  712.13
   1  10  -7 2153.42  557.91
   1 -10  -7 2546.70  522.01
  -1  10   7 2021.31 1043.91
   1  10  -7 3373.99  957.31
  -1 -10   7 1757.08  768.04
   1  10  -7 2203.86 1117.16
   1 -10  -7 2658.74  795.29
   1 -10  -6 1029.09  606.06
  -1 -10   6 1592.62  656.31
   1 -10  -6  629.15  201.36
  -1 -10   6  629.42  251.80
   1  10  -6  332.32  187.15
   1 -10  -6  566.55  368.61
  -1  10   6  244.53  239.98
   1  10  -6  401.69  281.68
  -1 -10   6  688.80  398.77
  -1  10   6  792.38  583.04
   1  10  -6 -167.67  680.80
   1 -10  -5  558.46  226.55
  -1 -10   5  883.08  502.40
   1 -10  -5   75.67   92.75
  -1 -10   5  -18.73  105.72
   1  10  -5   55.24  183.71
   1 -10  -5  242.91  163.45
  -1  10   5  283.24  300.77
   1  10  -5  506.01  343.60
  -1  10   5  241.13  789.29
   1  10  -5  598.76  800.87
  -1 -10   4 1027.93  625.90
   1 -10  -4  858.36  417.96
   1 -10  -4   66.71  143.49
   1 -10  -4   45.51   44.57
   1  10  -4  102.75  173.46
  -1  10   4  648.36  219.76
   1  10  -4   -9.65  201.75
  -1  10   4 1148.29  768.47
   1  10  -4  794.81  755.29
  -1 -10   3 -543.46  734.33
   1 -10  -3  282.00  461.92
   1 -10  -3   35.64   76.15
  -1 -10   3  150.36  142.30
   1 -10  -3   44.57   87.39
   1  10  -3  198.79  165.67
  -1  10   3  448.77  237.51
   1  10  -3 -490.38  434.52
  -1  10   3 1468.41  766.86
   1  10  -3  690.74  660.33
  -1 -10   2 4188.03 1212.21
   1 -10  -2 2927.54  770.61
   1 -10  -2 2998.35  747.41
  -1 -10   2 2756.82  411.76
   1 -10  -2 2686.27  558.44
   1  10  -2 2412.97  486.99
  -1  10   2 2505.91  621.50
   1  10  -2 4891.65 1366.21
  -1  10   2 2026.83  734.67
  -1 -10   1 3200.12  757.54
   1 -10  -1 4265.80 1545.91
  -1 -10   1 1716.47  438.12
   1 -10  -1 2382.93  702.18
  -1 -10   1 2304.16  363.93
   1 -10  -1 2701.24  581.04
  -1  10   1 3058.12  651.08
   1  10  -1 2978.20  775.76
  -1  10   1 1096.04  805.90
  -1 -10   0 4049.44  930.45
   1 -10   0 3805.16 1322.24
   1 -10   0 2355.21  517.10
   1 -10   0 2946.23  272.97
  -1  10   0 2583.92  691.03
   1  10   0 2059.33  644.38
   1 -10   0 1944.01  597.21
  -1  10   0 3000.03  956.20
  -1 -10  -1 7553.81 2177.37
   1 -10   1 8496.22  976.32
   1 -10   1 5638.71  810.09
   1 -10   1 6873.24  332.21
  -1  10  -1 6794.21 1593.36
   1  10   1 6140.92 1338.85
   1 -10   1 6435.05  932.31
  -1  10  -1 6250.55 1434.51
  -1 -10  -2  257.97  347.30
   1 -10   2  600.78  363.88
   1 -10   2  144.19  213.67
  -1  10  -2  826.67  378.97
  -1  10  -2  260.24  355.26
   1  10   2  392.98  322.03
   1 -10   2    6.31  139.70
  -1  10  -2  740.10  693.41
  -1 -10  -3 1576.77  821.35
   1 -10   3 1809.61  717.31
   1 -10   3 1449.34  498.29
  -1  10  -3  953.71  417.47
  -1  10  -3 1367.31  541.53
   1  10   3  746.94  742.40
   1 -10   3 1219.09  439.53
  -1  10  -3 -634.71  798.03
  -1 -10  -4 2400.99 1327.29
   1 -10   4 5436.14 1928.04
   1 -10   4 4378.52 1002.96
  -1  10  -4 3437.75  739.77
   1  10   4 3983.95 1276.50
  -1  10  -4 4463.70 1188.34
   1 -10   4 3757.87  606.99
   1  10   4 4041.91 1083.49
  -1  10  -4 4279.09 1559.93
  -1 -10  -5 1856.29  793.53
   1 -10   5 1101.37  979.87
   1 -10   5 1202.66  423.57
   1  10   5  876.11  594.86
  -1  10  -5  248.06  371.45
   1 -10   5  727.13  234.09
   1  10   5 1589.09  709.60
  -1  10  -5  836.17  808.72
  -1 -10  -6 4247.33 1240.77
   1 -10   6 4613.27 1460.17
   1 -10   6 3630.24  846.13
   1  10   6 4368.95 1279.81
  -1  10  -6 3561.79  551.05
   1 -10   6 3039.09  756.55
  -1  10  -6 3365.94  638.98
  -1 -10  -6 5403.15 1628.92
  -1 -10  -7 2467.89 1003.06
   1 -10   7 4759.56 1463.10
   1 -10   7 2779.71  583.42
   1  10   7 3579.23 1333.45
  -1  10  -7 3512.35  846.94
   1 -10   7 2543.33  571.20
  -1  10  -7 4086.14 1079.72
  -1 -10  -7 4366.36 1045.73
  -1 -10  -8  492.27  581.97
   1 -10   8  366.90  681.38
   1 -10   8  611.13  189.61
   1  10   8 1652.58  812.10
  -1  10  -8  678.85  309.70
   1 -10   8  355.18  126.42
  -1  10  -8  875.34  838.94
  -1 -10  -8  917.58  471.96
  -1 -10  -9 5391.69 1615.16
   1  10   9 5470.17 1451.30
  -1  10  -9 6362.48 2634.22
  -1 -10 -10 8332.25 2201.36
   1 -10  10 9403.27 1782.87
   1  10  10 7223.65  661.07
   1 -10  10 7025.18  795.21
  -1 -10 -10 6209.22  462.94
   1  10  10 9337.30 2699.05
  -1  10 -10 7880.56  912.97
   1 -10  10 6343.69  367.75
  -1  10 -10 7705.65 2367.23
  -1 -10 -10 8299.81 2510.50
  -1 -10 -1121628.92 1447.27
   1  10  1119381.05  852.37
   1 -10  1122145.72 1345.22
  -1 -10 -1117829.61  716.07
  -1  10 -1120368.09  780.10
   1  10  1118835.10 2078.19
  -1  10 -1117770.44  718.37
  -1  10 -1120442.43 1976.45
  -1 -10 -1122243.88 1662.25
  -1 -10 -12 7733.42 1989.07
   1 -10  12 9355.83 2800.18
   1  10  12 9554.32  806.03
   1 -10  12 9461.28  562.31
  -1  10 -12 8598.50  242.39
   1  10  12 9664.57 3561.42
  -1  10 -12 9122.74  499.89
  -1  10 -1211528.93 2947.61
  -1 -10 -1210198.27 2817.14
  -1 -10 -13  265.52  299.87
   1 -10  13  738.02  930.88
   1  10  13  159.05  154.82
   1 -10  13  -92.87  271.67
   1  10  13 -502.82  870.19
  -1  10 -13  133.48  120.57
  -1  10 -13 -256.59  853.70
  -1 -10 -13 1040.02  585.47
  -1 -10 -14 2839.81  785.25
   1 -10  14 2974.33 1064.41
   1  10  14 1792.30  738.67
   1 -10  14 3088.87  916.02
   1  10  14 2820.55 1012.37
  -1  10 -14 1926.34  437.28
  -1  10 -14 3210.35 1144.68
  -1 -10 -14 3988.04  941.72
  -1 -10 -1510877.27 1175.06
   1 -10  1513382.00 2806.28
   1  10  15 9464.93 1289.15
   1 -10  1511405.64  887.08
   1  10  1510273.08 2883.25
  -1  10 -1510705.14  457.06
  -1  10 -1511937.12 2894.29
  -1 -10 -15 9834.32 2378.83
  -1 -10 -16 1492.91  354.21
   1 -10  16 1179.89  736.20
   1  10  16  881.44  309.99
   1 -10  16 1245.57  301.82
   1  10  16 2013.86 1046.68
  -1  10 -16  961.17  593.72
  -1 -10 -16 1556.28  768.98
  -1 -10 -17 5089.37  685.18
   1 -10  17 4817.94 1731.16
   1  10  17 4130.99 1021.27
   1 -10  17 3678.44 1015.78
   1  10  17 3362.11 1063.58
  -1  10 -17 4413.45 2757.84
  -1 -10 -17 4874.40 1838.28
   1 -10  18 3014.30  763.53
   1  10  18 1190.78  631.45
   1 -10  18 1951.37  434.81
   1  10  18 2016.27 1495.90
  -1  10 -18 1365.69 1187.84
  -1 -10 -18 1117.96  615.27
   1 -10  19 3635.65 2007.87
   1  10  19 2529.98  929.05
   1 -10  19 3425.42  980.09
   1  10  19 2593.34 1598.55
  -1 -10 -19 2221.00 1070.75
   1 -10  20   77.61  786.48
   1  10  20  372.39  296.03
   1 -10  20  452.42  468.87
   1  10  20  781.98  474.47
  -1 -10 -20 1007.97  661.89
   1 -10  21  747.35  378.85
   1  10  21  592.28  201.42
   1 -10  21  374.51  353.59
  -1 -10 -21 -562.24  578.92
   1 -10  22  636.00  525.17
   1  10  22  435.91  369.30
   1 -10  22 -385.20  365.65
  -1 -10 -22  -46.85  528.27
   1 -10  23 4212.79 1883.22
   1 -10  23 4441.77 1215.66
   1  10  23 5344.63 1099.34
  -1 -10 -23 4761.71 1897.65
   1 -10  24  -89.48  383.93
   1  10  24 1699.61  800.40
  -1 -10 -24  775.81  385.17
   1 -10  25 5613.49 3217.42
   1 -10  25 4902.99 1591.59
   1  10  25 6691.02 1683.86
  -1  10 -25 6896.77 3603.00
  -1 -10 -25 8819.90 2731.63
   1 -10  26 1181.79  480.39
   1 -10  26  640.48  358.68
   1  10  26  993.26  608.66
  -1  10 -26 1425.49 1078.83
  -1 -10 -26  609.37  911.94
   1 -10  27   74.92  582.16
   1 -10  27  704.59  439.50
   1  10  27 1069.52  789.38
  -1  10 -27 1244.55 1152.62
  -1 -10 -27   -3.01  703.12
   1 -10  28 1314.41  439.03
   1 -10  28  767.01  736.30
   1  10  28  941.76  927.64
  -1  10 -28  907.20  786.13
  -1 -10 -28 2063.70  527.28
   1 -10  29 1779.24  886.52
   1 -10  29  -16.80  540.73
   1  10  29  967.54  548.44
  -1  10 -29 1158.88  701.09
  -1 -10 -29  462.21  842.24
   1 -10  30 2462.07 1634.80
   1 -10  30 3506.71 1969.12
   1  10  30 4018.29 1763.30
  -1  10 -30 3745.62 1923.90
  -1 -10 -30 5566.80 2112.76
   1 -10  31  598.45  852.43
  -1 -11  31  193.65  400.83
  -1 -11  31 1404.14  788.45
   1 -11 -31 1275.26  637.56
  -1 -11  30  481.71  472.18
   1 -11 -30  601.65  550.72
  -1 -11  29  770.18  851.40
  -1 -11  29 -397.41  508.79
   1  11 -29 -407.11 1053.88
   1 -11 -29  -34.13  448.93
  -1 -11  28 3652.79 1510.94
  -1 -11  28 2065.25 1151.79
  -1  11  28 1944.28 1591.42
   1  11 -28 4557.75 2435.89
   1 -11 -28 3521.56 1445.73
  -1 -11  27  993.91  489.63
  -1 -11  27  664.57  460.06
  -1  11  27 1452.16  443.28
   1  11 -27  578.13 1304.72
   1 -11 -27  471.37  647.35
  -1 -11  26  526.24  429.42
  -1 -11  26  736.28  601.02
  -1  11  26  396.59  304.49
   1  11 -26  222.20  792.62
   1 -11 -26 -220.55  534.74
  -1 -11  25 -936.49  686.68
  -1 -11  25   19.60  351.43
  -1  11  25  205.55  392.90
   1  11 -25  933.28  417.96
   1 -11 -25  564.44  485.13
  -1 -11  24 1757.92  941.17
  -1 -11  24  380.86  190.87
  -1  11  24  603.89  392.42
   1  11 -24 1168.17  745.45
   1 -11 -24  878.10  495.65
  -1 -11  23 2348.80 1207.19
  -1 -11  23 1121.44  383.82
  -1  11  23 1636.49  523.63
   1  11 -23 1342.81  855.83
   1 -11 -23 1861.66  766.34
  -1 -11  22 1013.07  671.24
  -1 -11  22 1717.55  878.10
  -1  11  22  801.40  646.44
   1  11 -22  520.07  651.25
   1 -11 -22  992.20  614.35
  -1 -11  21  616.41  638.79
  -1 -11  21  674.76  206.80
  -1  11  21 1341.66  875.85
   1  11 -21  473.75  732.33
   1 -11 -21  960.66  709.57
  -1 -11  20  167.48  548.37
  -1  11  20  618.92  513.69
  -1 -11  20 -177.55  373.08
  -1  11  20   48.00  323.42
   1  11 -20  679.39  716.32
   1 -11 -20 -552.41  540.10
  -1 -11  19  829.95  700.01
  -1  11  19 -144.57  311.20
  -1 -11  19  928.27  261.35
  -1  11  19  243.39  410.93
   1  11 -19 1345.71 1004.91
   1 -11 -19 1340.82  681.92
  -1 -11  18  797.31  776.39
  -1  11  18  389.28  220.49
  -1 -11  18  167.01  162.75
  -1  11  18  259.95  458.54
   1  11 -18  284.80  194.95
   1  11 -18 1772.07  563.37
   1 -11 -18  -58.34  512.78
  -1 -11  17  788.66  587.45
  -1  11  17  520.81  512.55
  -1 -11  17  506.21  227.74
  -1  11  17 2125.34  535.56
   1  11 -17  490.43  347.93
   1  11 -17  579.65  375.42
   1 -11 -17  740.20  389.56
   1 -11 -16 1448.32  482.31
  -1 -11  16 1495.51  825.86
  -1  11  16 1305.86  574.95
  -1 -11  16 1780.95  443.10
  -1  11  16 1329.25  406.34
   1  11 -16 1398.08  436.37
   1  11 -16 1030.81  760.48
   1 -11 -16 2065.38  712.01
   1 -11 -1510200.24 1367.97
  -1 -11  1514408.12 2200.64
  -1  11  1510365.64  779.25
  -1 -11  1511495.31 1053.65
  -1  11  1512767.39 1143.22
   1  11 -15 9749.26 1301.47
   1  11 -1514155.22 2937.17
   1 -11 -15 9325.46 2462.52
   1 -11 -14 9984.07 1300.09
  -1 -11  14 9745.07 3581.43
  -1  11  14 9340.66 1238.12
  -1 -11  14 9661.35 1226.13
  -1  11  1412068.27 3401.44
   1  11 -1410224.19 1391.51
   1  11 -1412529.41 2720.96
   1 -11 -1411881.25 3033.99
   1 -11 -13108145.4 3767.65
  -1 -11  13105622.6 3813.63
  -1  11  1395876.37 3191.42
  -1 -11  13107783.3 3514.39
  -1  11  13101883.7 3541.04
   1  11 -13102971.0 3564.46
   1  11 -13101087.1 4037.50
   1 -11 -13113465.1 3980.87
   1 -11 -1213931.64 1054.70
  -1 -11  1213816.76 4320.99
  -1  11  1213382.76 1294.36
  -1 -11  1214207.56 1142.33
  -1  11  1217635.62 2083.36
   1  11 -1214137.55 1586.24
   1  11 -1212101.89 3656.44
   1 -11 -1212634.60 1325.08
   1 -11 -1172119.04 3027.68
  -1  11  1171863.70 2919.98
  -1 -11  1174157.98 2916.99
  -1  11  1175242.16 3266.15
   1  11 -1173726.18 3153.19
   1  11 -1172497.30 3300.70
   1 -11 -1183072.79 3552.35
  -1 -11  1012746.14 3457.15
  -1  11  1013560.05 2314.38
   1  11 -1010978.97 3770.41
   1 -11 -1011242.97 1187.55
   1 -11  -8 7807.32 1832.20
  -1 -11   8 7135.05 1131.63
  -1  11   8 6323.91 1894.02
   1  11  -8 8194.57 1141.51
   1  11  -8 6304.95 1569.58
   1 -11  -8 8045.71 1986.89
   1 -11  -7 1964.42  562.29
  -1 -11   7 3741.31 1147.77
   1 -11  -7 1327.47  280.32
  -1 -11   7 1923.58  494.33
   1  11  -7  869.65  254.70
   1 -11  -7  731.18  165.81
  -1  11   7 1599.78  402.76
   1  11  -7 1278.26  330.23
   1  11  -7 1410.32 1115.07
   1 -11  -7 1873.49  586.23
  -1 -11   6  122.55  529.37
   1 -11  -6  160.47  103.54
  -1 -11   6  261.42   98.42
   1 -11  -6  377.83  221.35
   1  11  -6  134.68  241.70
  -1  11   6  304.42  495.55
   1  11  -6  592.78  665.65
  -1  11   6  719.70  650.28
   1  11  -6 1011.46  497.34
   1 -11  -5  235.50  271.21
   1 -11  -5   62.38   72.17
  -1 -11   5   91.66  122.73
   1 -11  -5  106.82  136.19
   1  11  -5  121.29  199.25
  -1  11   5  131.20  222.92
   1  11  -5  575.16  706.15
  -1  11   5 -207.15  892.46
   1  11  -5  795.33 1256.42
  -1 -11   4 4984.23 1087.59
   1 -11  -4 3208.60  776.36
   1 -11  -4 1928.36  417.38
  -1 -11   4 2204.12  348.31
   1 -11  -4 2654.40  372.88
   1  11  -4 1439.95  427.34
  -1  11   4 2586.74  830.38
   1  11  -4 2211.44 1678.59
  -1  11   4 2575.25  649.34
  -1 -11   3 3262.93  949.52
   1 -11  -3 4345.60 1451.25
   1 -11  -3 3126.83  571.33
  -1 -11   3 3247.39  553.08
   1 -11  -3 2942.59  622.87
   1  11  -3 1751.18  429.15
  -1  11   3 3599.85  892.53
   1  11  -3 3996.89  838.10
  -1  11   3 7252.47 1877.05
  -1 -11   2 1544.20  765.69
   1 -11  -2  563.63  398.64
  -1 -11   2  524.60  203.02
   1 -11  -2 1084.01  338.45
  -1 -11   2  866.82  234.64
   1 -11  -2 1257.35  289.76
  -1  11   2 2047.90  555.36
   1  11  -2  325.33  396.92
  -1  11   2 1456.83  902.97
  -1 -11   1 1391.89  941.31
   1 -11  -1 3155.31  834.22
   1 -11  -1 1167.42  321.89
  -1 -11   1 1043.28  277.15
  -1 -11   1 1064.75  299.69
   1 -11  -1 1798.68  446.87
  -1  11   1 2252.58  718.89
   1  11  -1 2772.85  538.75
  -1  11   1  295.24  976.43
  -1 -11   0  682.60  426.43
   1 -11   0  725.67  576.46
   1 -11   0   96.17  138.08
   1 -11   0  225.81  134.45
  -1  11   0  423.49  378.79
   1  11   0  256.74  350.64
  -1  11   0  491.29  641.71
  -1 -11  -1 9034.83 3181.82
   1 -11   1 7875.55  989.47
   1 -11   1 6759.13  626.75
   1 -11   1 7766.59  294.44
  -1  11  -1 6051.17  857.61
   1  11   1 7698.25  941.24
   1  11   1 8628.16 2223.95
  -1  11  -110327.19 2094.83
  -1 -11  -215155.40 1297.49
   1 -11   212819.17  891.31
   1 -11   210029.58 1011.44
   1 -11   211844.67  600.66
  -1  11  -213595.21  677.86
   1  11   211882.02 1055.20
   1 -11   210206.83 1070.15
   1  11   216425.64 1350.56
  -1  11  -214870.09 1691.76
  -1 -11  -363074.35 2322.42
   1 -11   360517.21 2302.34
   1 -11   359113.69 1752.51
  -1  11  -354144.84 1705.16
  -1  11  -356121.36 1829.91
   1  11   354581.80 1989.51
   1 -11   351874.95 1718.27
   1  11   360262.45 2638.00
  -1  11  -352200.64 2255.36
  -1 -11  -4  928.31  753.83
   1 -11   4  519.28  585.23
   1 -11   4  943.95  265.72
  -1  11  -4  395.58  180.72
  -1  11  -4 1675.73  396.82
   1  11   4  698.92  600.58
   1 -11   4  809.47  299.53
   1  11   4 1142.29  848.29
  -1  11  -4 1833.11 1315.95
  -1 -11  -5  504.86  550.73
   1 -11   5 2605.03  951.32
   1 -11   5  596.87  288.23
   1  11   5 1334.28  629.60
  -1  11  -5 1040.32  496.28
   1 -11   5  594.80  297.10
   1  11   5 2817.45  733.94
  -1  11  -5 -432.18  876.06
  -1 -11  -6 1871.32  731.39
   1 -11   6 1573.60  423.32
   1 -11   6 1507.43  454.32
   1  11   6 1282.79  667.71
  -1  11  -6 1262.38  411.16
   1 -11   6 1048.72  286.12
  -1  11  -6 2334.31 1337.92
  -1 -11  -6 2694.81 1004.25
  -1 -11  -7  689.02  391.39
   1 -11   7 -237.73  512.06
   1 -11   7  387.51  195.69
   1  11   7 -939.34  723.36
  -1  11  -7  342.75  225.52
   1 -11   7   -9.95   98.01
  -1  11  -7 1237.10  575.23
  -1 -11  -7  192.08  352.47
  -1 -11  -8  549.24  549.51
   1 -11   8 1242.00  829.17
   1 -11   8  662.20  237.02
   1  11   8  433.15  454.89
  -1  11  -8  334.11  167.54
   1 -11   8  310.54  175.03
  -1  11  -8  644.58  712.50
  -1 -11  -8  194.81  340.09
  -1 -11  -9 5741.96 1361.88
   1 -11   9 6841.35 1684.26
   1 -11   9 5174.83  346.80
   1  11   9 6309.20 2441.79
  -1  11  -9 5114.72  747.45
  -1  11  -9 4419.33 2293.74
  -1 -11  -9 6672.13 2527.51
  -1 -11 -10  134.93  584.49
   1 -11  10 -420.09  809.24
   1 -11  10  218.51  205.20
   1  11  10 -120.46  846.72
  -1  11 -10  252.33  116.08
  -1  11 -10 1067.01  719.32
  -1 -11 -10  -36.46  805.94
  -1 -11 -1112486.98 2448.94
   1 -11  11 9200.01  428.19
   1  11  11 9122.42 3249.34
  -1  11 -1110048.08  624.66
  -1  11 -1113399.91 3217.87
  -1 -11 -1110941.74 3359.48
  -1 -11 -12 1747.36  955.01
   1 -11  12  378.83  368.93
   1  11  12  877.31  299.23
   1 -11  12 1557.39  320.80
   1  11  12 1734.67  968.69
  -1  11 -12  978.45  284.64
  -1  11 -12 2104.23  976.38
  -1 -11 -12 1817.86  949.71
  -1 -11 -13  148.25  244.25
   1 -11  13  448.57  551.50
   1 -11  13  208.30  311.18
   1  11  13 -170.73  827.90
  -1  11 -13  788.75  878.91
  -1 -11 -13  705.74  702.01
  -1 -11 -14 1387.90  611.74
   1 -11  14 1520.23  831.48
   1  11  14 1302.28  395.69
   1 -11  14 1641.74  369.29
   1  11  14 2819.00 1089.87
  -1  11 -14 5472.40 1519.82
  -1 -11 -14 3496.11  866.66
  -1 -11 -15 8197.81 1035.32
   1 -11  1510955.25 1790.60
   1 -11  15 6782.50  361.12
   1  11  15 5947.67 2735.32
  -1  11 -15 5661.12 2488.99
  -1 -11 -15 8084.66 2045.89
  -1 -11 -16  342.08  219.42
   1 -11  16  869.64  671.07
   1 -11  16  380.08  198.01
   1  11  16  328.53  618.60
  -1  11 -16 2125.06 1419.60
  -1 -11 -16  251.27  498.07
   1 -11  17 3532.11 1078.28
   1 -11  17 2783.44  731.03
   1  11  17 3804.43  992.29
  -1  11 -17 4740.52 2022.82
  -1 -11 -17 3838.98 1137.70
   1 -11  18 1077.83  748.16
   1 -11  18  492.72  173.22
   1  11  18 -433.29  761.49
  -1  11 -18 -673.59  818.25
  -1 -11 -18  306.21  631.26
   1 -11  19 2299.48  960.09
   1 -11  19  266.62  227.28
   1  11  19 1814.02  794.02
  -1  11 -19 2113.69 1041.72
  -1 -11 -19  398.72  525.17
   1 -11  20   20.30  415.40
   1 -11  20  912.58  458.59
   1  11  20  943.35  423.75
  -1  11 -20 1123.68  570.71
  -1 -11 -20 1103.89  566.00
   1 -11  21 1492.29  826.33
   1 -11  21  468.68  292.11
   1  11  21  929.61  829.77
  -1  11 -21  974.48  558.15
  -1 -11 -21  535.43  406.69
   1 -11  22  371.19  702.51
   1 -11  22  369.46  251.11
   1  11  22 1245.71  878.64
  -1 -11 -22  540.46  633.18
   1 -11  23 2292.47 1089.16
   1 -11  23  879.89  263.83
   1  11  23 2077.14  608.63
  -1 -11 -23  951.48  575.68
   1 -11  24  464.61  579.96
   1 -11  24 -138.20  390.44
  -1 -11 -24  238.82  387.41
   1 -11  25  303.27  820.67
   1 -11  25   30.30  390.38
   1  11  25 1130.17  891.00
  -1 -11 -25  543.64  439.36
   1 -11  26 1183.66  774.03
   1 -11  26  735.36  680.27
   1  11  26  400.27  371.45
  -1 -11 -26  632.23  432.89
   1 -11  2712022.06 2793.68
   1 -11  27 8177.78 1290.35
   1  11  27 8926.47 1528.83
  -1 -11 -2711153.67 1699.79
   1 -11  28  359.08  394.51
   1 -11  28  252.85  332.06
   1  11  28  592.81  298.90
  -1  11 -28 1083.72  860.54
  -1 -11 -28  243.81  399.59
   1 -11  29  554.79  436.82
   1 -11  29  419.69  274.44
   1  11  29 1394.29  713.35
  -1  11 -29 -714.93  920.78
  -1 -11 -29  212.06  336.71
   1 -11  30  284.65  875.67
   1 -11  30 1433.37  716.70
   1 -11  31 1882.75 1428.46
  -1 -12  31  659.11  363.27
  -1 -12  30  757.53  889.87
  -1 -12  30  772.54  430.31
   1 -12 -30  367.19  450.68
  -1 -12  29 -414.38  561.22
  -1 -12  29 -114.03  457.65
   1 -12 -29  258.02  351.79
  -1 -12  28  641.40  892.20
  -1 -12  28  698.58  528.69
  -1  12  28 1363.77  551.84
   1  12 -28 2007.62 1272.69
   1 -12 -28  647.69  565.77
  -1 -12  27  547.44  880.96
  -1 -12  27  448.99  418.26
  -1  12  27  687.07  503.87
   1  12 -27 1257.20 1196.49
   1 -12 -27  493.09  409.26
  -1 -12  26 3013.31 1218.10
  -1 -12  26 2396.34  719.68
  -1  12  26 4206.93 1199.13
   1  12 -26 1054.88 1236.17
   1 -12 -26 3593.61 1215.20
  -1 -12  25 4154.11 1863.12
  -1 -12  25 3515.01 1358.13
  -1  12  25 5718.82 1813.36
   1  12 -25 4352.37 2824.40
   1 -12 -25 3818.95  991.62
  -1 -12  24 1363.38  582.64
  -1 -12  24 2236.59  824.72
  -1  12  24 1466.48  698.67
   1  12 -24 3055.27 1657.63
   1 -12 -24 2680.39 1302.13
  -1 -12  23 1712.01  828.67
  -1 -12  23 2760.55  896.44
  -1  12  23 2803.40  692.72
   1  12 -23 3298.15 1359.45
   1 -12 -23 4523.59 1262.38
  -1 -12  22  918.64  777.32
  -1 -12  22  417.17  309.05
  -1  12  22  688.03  529.90
   1  12 -22  -80.19  909.83
  -1 -12  21 8745.50 2388.76
  -1 -12  21 1924.42  772.25
  -1  12  21 2409.41  831.62
   1  12 -21 2336.71 1378.54
   1 -12 -21 1259.25  766.84
  -1 -12  20  944.89  413.06
  -1 -12  20  337.50  345.33
  -1  12  20  176.03  376.26
   1  12 -20  470.81  848.41
   1 -12 -20 -234.36  517.56
  -1 -12  19 1130.32  961.08
  -1 -12  19  501.40  375.88
  -1  12  19 1145.31  532.17
   1  12 -19 1358.20 1182.58
   1 -12 -19   88.26  238.35
  -1 -12  18  704.32  516.36
  -1 -12  18   71.17  307.03
  -1  12  18  605.65  598.82
   1  12 -18  103.10  899.07
   1 -12 -18  -67.69  439.40
  -1 -12  17  512.72  950.48
  -1 -12  17 1674.45  640.45
  -1  12  17 1026.68  582.79
   1 -12 -17 2321.34  868.24
  -1 -12  16  249.42  522.82
  -1 -12  16  394.55  149.12
  -1  12  16  -64.51  709.38
   1  12 -16  -11.51  933.90
   1 -12 -16  196.19  221.08
   1 -12 -15 1272.76  458.36
  -1 -12  15  633.27  647.99
  -1 -12  15 1161.39  228.91
  -1  12  15 1003.24  648.09
   1  12 -15  706.89  649.96
   1 -12 -15 2631.65  833.71
   1 -12 -14 1912.87  801.88
  -1 -12  14 4642.64 1841.75
  -1 -12  14 3361.91  875.05
  -1  12  14 5000.57 1337.98
   1  12 -14 2813.99  784.77
   1  12 -14 3368.61 1055.15
   1 -12 -14 4925.88  918.12
   1 -12 -1310142.96 1151.30
  -1 -12  1313212.59 1574.70
  -1 -12  13 9815.44  516.78
  -1  12  13 9860.67 2600.38
   1  12 -13 9555.00 1565.06
   1  12 -1314708.01 3215.92
   1 -12 -13 9329.81 2364.94
   1 -12 -12 1166.23  530.28
  -1 -12  12  619.49  348.34
  -1  12  12  312.20  626.68
   1  12 -12  768.07  311.37
   1  12 -12 -658.53  793.68
   1 -12 -12  222.91  274.58
   1 -12 -1131485.48 1734.27
  -1 -12  1130553.29 1967.01
  -1 -12  1130278.97 1531.25
  -1  12  1128788.14 1588.26
   1  12 -1127991.65 1422.51
   1  12 -1133511.13 2316.74
   1 -12 -1130476.96 3146.02
   1 -12 -10  627.63  402.46
  -1 -12  10 -906.88  832.59
  -1 -12  10  212.23  213.23
   1 -12 -10  231.17  161.99
  -1  12  10  863.05  467.64
   1  12 -10  502.03  324.14
   1  12 -10 -242.48  848.99
   1 -12 -10  588.69  502.23
   1 -12  -932046.24 1812.67
  -1 -12   932485.26 2544.32
  -1 -12   925991.31 1120.28
  -1  12   928048.22 2310.31
   1  12  -929881.68 1643.49
   1  12  -929988.36 2930.88
   1 -12  -933663.13 3265.57
   1 -12  -8 3139.35  621.57
  -1 -12   8 4360.27 1074.94
  -1 -12   8 2525.87  614.48
   1 -12  -8 1220.04  188.56
  -1  12   8 1520.40  573.58
   1  12  -8 2257.99  630.80
   1  12  -8 3393.37 1134.98
   1 -12  -8 5215.62 1533.26
   1 -12  -7  408.82  309.61
  -1 -12   7 1055.98  839.58
  -1 -12   7  118.30  106.69
   1 -12  -7  180.15   83.95
  -1  12   7 -107.73  363.53
   1  12  -7  551.17  370.77
   1  12  -7 1407.79  948.34
   1 -12  -7  519.06  452.82
   1 -12  -6  457.90  514.41
  -1 -12   6 1130.71  573.24
  -1 -12   6  585.40  170.47
   1 -12  -6  320.19  114.50
  -1  12   6  698.59  585.67
   1  12  -6  691.38  532.72
  -1  12   6 1586.24  666.52
   1  12  -6 1358.22 1216.93
  -1 -12   526224.12 1794.38
   1 -12  -527432.47 2404.41
  -1 -12   527046.25 1026.23
   1 -12  -526049.62  984.17
  -1  12   527904.85 1559.40
   1  12  -525715.22 1541.94
  -1  12   525962.51 1794.81
  -1 -12   414432.29 2082.28
   1 -12  -411993.89 1036.83
  -1 -12   4 9794.75  587.77
   1 -12  -410347.24  295.23
  -1  12   410118.65 1066.17
   1  12  -4 9891.14 1546.47
  -1  12   414209.60 4075.32
  -1 -12   3 2123.44  808.13
   1 -12  -3  614.63  542.82
  -1 -12   3 1572.06  378.96
   1 -12  -3 1108.69  308.27
  -1  12   3 1761.78  482.53
   1  12  -3 2287.02  698.87
  -1  12   3  835.33 1193.35
  -1 -12   2  680.68  345.51
   1 -12  -2  324.68  335.51
  -1 -12   2  178.75  152.41
  -1 -12   2   24.06   69.51
   1 -12  -2  218.54   87.97
  -1  12   2  136.25  332.49
   1  12  -2  395.80  491.92
  -1  12   2  699.18  781.93
  -1 -12   110024.47 2346.29
   1 -12  -111571.72 2151.60
   1 -12  -1 8485.39  266.29
  -1  12   1 9993.68 2468.32
   1  12  -110777.89 1223.30
   1  12  -1 9914.08 3169.73
  -1  12   1 9632.15 4039.40
  -1 -12   0 -254.19  765.52
   1 -12   0 -313.11  648.51
   1 -12   0  257.05  184.04
  -1  12   0 1160.95  570.78
   1  12   0 -112.00  690.13
  -1  12   0 1656.47 1094.09
   1  12   0  789.66  684.36
  -1 -12  -1 5774.78 1609.59
   1 -12   1 5985.41 1951.41
   1 -12   1 3427.36  938.40
   1 -12   1 5757.63  432.48
  -1  12  -1 4990.92 1533.53
   1  12   1 6398.41 1793.31
   1  12   1 6165.25 1792.26
  -1  12  -1 7107.84 1596.29
  -1 -12  -2 3075.43 1223.17
   1 -12   2 2782.75  770.46
   1 -12   2 1899.70  520.10
  -1  12  -2 2055.24  792.24
   1  12   2 1219.19  690.12
   1  12   2 2974.30 1075.48
  -1  12  -2 1544.59 1000.17
  -1 -12  -3 1086.36  787.32
   1 -12   3  148.96  605.70
   1 -12   3  145.36   97.89
  -1  12  -3  120.79  192.20
   1  12   3  693.84  629.00
   1  12   3  -35.88  820.88
  -1  12  -3  478.27  846.11
  -1 -12  -4  200.52  434.14
   1 -12   4  741.55  552.18
   1 -12   4  220.97  124.07
  -1  12  -4  401.43  215.88
   1  12   4  370.18  313.21
   1  12   4  349.98  458.59
  -1  12  -4 1079.13  971.54
  -1 -12  -5  617.93  508.16
   1 -12   5  484.48  484.10
   1 -12   5   91.08  181.63
   1  12   5  963.16  314.71
  -1  12  -5 -102.37  243.88
   1  12   5  463.53  587.02
  -1  12  -5 1176.69  623.34
  -1 -12  -6 1814.51  746.99
   1 -12   6 1037.65  635.47
   1 -12   6 1655.02  335.02
   1  12   6 1593.69  669.38
  -1  12  -6 1587.00  421.42
  -1  12  -6 1404.95  929.42
  -1 -12  -6 1331.63  760.05
  -1 -12  -7 -169.05  615.01
   1 -12   7  772.65  651.06
   1 -12   7  236.04  153.83
   1  12   7  127.41  270.82
  -1  12  -7  206.57  221.71
  -1  12  -7  501.77  620.14
  -1 -12  -7  955.87  708.39
  -1 -12  -8 2951.76  935.58
   1 -12   8 2566.63 1355.01
   1 -12   8 2216.98  792.21
   1  12   8 2745.64 1037.67
  -1  12  -8 2132.05  459.25
  -1  12  -8 2139.84  844.57
  -1 -12  -8 3349.90 1256.24
   1 -12   928168.40 1598.72
   1  12   925935.46 1536.06
  -1  12  -921780.00 1705.69
   1 -12  10  253.97  442.23
   1 -12  10  313.91  147.26
   1  12  10 -293.56  850.28
  -1  12 -10   12.51   60.83
  -1  12 -10 1726.58 1733.95
  -1 -12 -10 1862.40  883.64
  -1 -12 -11 1005.28  334.97
   1 -12  11 1033.83  642.75
   1 -12  11  801.07  166.71
   1  12  11  260.02  444.11
  -1  12 -11 1027.34  685.61
  -1 -12 -11 1259.66  519.75
  -1 -12 -12 1050.14  698.80
   1 -12  12 1667.50  424.20
   1  12  12 1083.37  564.61
  -1  12 -12 1276.73 1009.09
  -1 -12 -12 2804.31  670.74
  -1 -12 -13 7259.46 1217.99
   1 -12  13 7844.41 2797.30
   1 -12  13 6929.11  682.80
   1  12  13 7992.24 2214.66
  -1  12 -13 9713.30 2115.02
  -1 -12 -1310583.32 2823.90
  -1 -12 -14  634.05  518.76
   1 -12  14   14.44  622.53
   1 -12  14  300.20  183.46
   1  12  14  825.17  701.98
  -1  12 -14 1121.85 1031.80
  -1 -12 -14  -74.26  623.93
  -1 -12 -15 1366.55  481.32
   1 -12  15  823.79  443.67
   1 -12  15 1526.91  468.12
   1  12  15 1100.48  543.90
  -1  12 -15  304.99  430.04
  -1 -12 -15 2334.96  773.52
   1 -12  16 4778.32 1408.45
   1 -12  16 2053.93  752.61
   1  12  16 4450.27 1097.02
  -1  12 -16 5261.64 1525.56
  -1 -12 -16 3869.10  930.93
   1 -12  17 1084.57  521.15
   1 -12  17  317.56  284.97
   1  12  17 1491.97  858.89
  -1  12 -17 1285.96  816.37
  -1 -12 -17  616.84  248.55
   1 -12  18 1717.65 1600.88
   1 -12  18 1987.24  441.32
   1  12  18 1117.62 1289.30
  -1  12 -18  971.53  745.84
  -1 -12 -18 1438.30  999.11
   1 -12  19 2180.21 1103.25
   1 -12  19 1610.04  631.91
   1  12  19 1442.95  803.57
  -1  12 -19  743.90  862.33
  -1 -12 -19 1843.24  924.66
   1 -12  20 -613.91  700.32
   1 -12  20  371.84  210.85
   1  12  20  278.66  513.83
  -1  12 -20 1375.42 1096.21
  -1 -12 -20  999.95  665.68
   1 -12  21  629.03  284.61
   1  12  21  -22.15  864.56
  -1  12 -21  798.78  849.07
  -1 -12 -21  191.63  612.08
   1 -12  22  863.05  913.48
   1 -12  22  620.87  203.60
   1  12  22  921.83  659.33
  -1 -12 -22 1035.10  626.46
   1 -12  23  -63.28  663.80
   1 -12  23 -382.83  374.50
   1  12  23 1233.46  594.06
  -1 -12 -23 1065.00  630.80
   1 -12  24 2822.07  953.36
   1 -12  24  274.51  380.95
   1  12  24  774.95  431.01
  -1  12 -24  374.70 1483.57
  -1 -12 -24  767.71  667.44
   1 -12  25 2373.19 1703.33
   1 -12  25 2425.02  808.88
   1  12  25 2969.02 1514.20
  -1 -12 -25 2704.74 1029.26
   1 -12  26 2337.53 1127.63
   1 -12  26  638.92  528.23
   1  12  26  -35.44  695.59
  -1 -12 -26 1146.33  567.49
   1 -12  27  563.00  823.60
   1 -12  27  845.69  387.77
  -1 -12 -27  708.45  555.09
   1 -12  28 3612.78 2117.21
   1 -12  28 2278.55 1596.59
  -1 -12 -28 4856.31 1604.04
   1 -12  29  407.05  685.71
   1 -12  29  487.06  279.98
   1 -12  30  163.91  514.87
  -1 -13  29  557.98  475.20
  -1 -13  29  187.47  211.83
  -1 -13  28  -65.99  664.01
  -1 -13  28  555.68  368.40
   1 -13 -28 -179.40  519.70
  -1 -13  27  693.13  632.10
  -1 -13  27   62.20  296.01
  -1  13  27 -538.41  640.65
   1  13 -27 1119.81  592.74
   1 -13 -27 -245.27  562.37
  -1 -13  26 9070.87 1922.83
  -1 -13  26 4666.54 2681.26
  -1  13  26 4115.20 2370.02
   1  13 -26 6455.49 4264.16
   1 -13 -26 7117.57 2794.16
  -1 -13  25 1669.92  793.04
  -1 -13  25  137.39  310.40
  -1  13  25  648.23  493.26
   1  13 -25  -45.31  944.24
   1 -13 -25  587.42  864.79
  -1 -13  24  526.78  719.06
  -1 -13  24  981.21  475.50
  -1  13  24  690.45  516.15
   1  13 -24 2814.90 1125.06
   1 -13 -24  592.58  646.75
  -1 -13  23  941.63  642.36
  -1 -13  23  679.08  340.35
  -1  13  23  588.17  459.71
   1  13 -23  488.00 1266.66
   1 -13 -23  -74.26  562.53
  -1 -13  22  531.14  482.70
  -1 -13  22   84.82  296.96
  -1  13  22 -894.61  608.20
   1  13 -22 1446.68 1192.83
   1 -13 -22  448.87  470.25
  -1 -13  21  -77.75  740.56
  -1 -13  21 -201.88  394.79
  -1  13  21  -29.48  639.43
   1  13 -21 3491.30 1264.85
   1 -13 -21  680.14  625.34
  -1 -13  20  185.07  548.13
  -1 -13  20 -100.01  384.37
  -1  13  20  464.07  555.54
   1  13 -20    5.09  582.96
   1 -13 -20 -748.52  508.01
  -1 -13  19  272.99 1023.65
  -1 -13  19  332.22  316.05
  -1  13  19  944.03  528.32
   1  13 -19  609.77  564.59
   1 -13 -19  203.89  463.87
  -1 -13  18  842.72  535.78
  -1 -13  18  439.91  236.94
  -1  13  18  566.23  342.16
   1  13 -18   40.20  782.03
   1 -13 -18  593.96  479.29
  -1 -13  17  653.15  946.21
  -1 -13  17 1335.65  631.34
  -1  13  17 1212.95  463.02
   1  13 -17  465.18  963.28
   1 -13 -17 2069.32  813.45
  -1 -13  16 1368.41 1086.85
  -1 -13  16  279.70  173.88
  -1  13  16  328.31  298.29
   1  13 -16 1053.84  493.63
   1 -13 -16  673.50  566.71
  -1 -13  15  728.77  553.32
  -1 -13  15 -323.41  263.88
  -1  13  15  779.26  383.81
   1  13 -15  717.30  614.89
   1 -13 -15  855.32  446.59
   1 -13 -14 1697.17  981.44
  -1 -13  14 2248.39 1199.53
  -1 -13  14 1901.57  486.20
  -1  13  14 2377.05  860.77
   1  13 -14 2942.65  836.80
   1 -13 -14 1875.94  619.41
   1 -13 -1319145.59 2453.34
  -1 -13  1318217.14  873.87
  -1  13  1323135.84 1910.26
   1  13 -1324298.96 2129.55
   1 -13 -1320737.88 2806.44
   1 -13 -1215115.20 1754.60
  -1 -13  1218034.03 3391.53
  -1 -13  1213419.03  770.19
  -1  13  1216267.40 1551.87
   1  13 -1213915.69 1389.17
   1  13 -1218111.10 4489.69
   1 -13 -1222617.32 2874.87
   1 -13 -11 1553.92  807.51
  -1 -13  11 1728.20  845.50
  -1 -13  11 1285.51  369.92
  -1  13  11 2241.23  555.23
   1  13 -11 2300.02  960.81
   1  13 -11 2466.63 1044.76
   1 -13 -11  927.16  510.68
   1 -13 -10  -99.77  207.46
  -1 -13  10  766.04  437.01
  -1 -13  10  207.86  231.63
  -1  13  10  560.12  429.71
   1  13 -10  330.64  279.00
   1  13 -10 -307.13  958.29
   1 -13 -10 -416.76  743.29
   1 -13  -9 5076.98 1296.73
  -1 -13   9 4657.26 2303.01
  -1 -13   9 5761.58  937.50
  -1  13   9 5853.24 1353.57
   1  13  -9 3565.95 1017.66
   1 -13  -9 4708.51 1181.14
   1 -13  -8  277.92  408.30
  -1 -13   8 1527.49 1251.26
  -1 -13   8  643.94  240.90
  -1  13   8  150.84  470.27
   1  13  -8 -164.26  345.09
   1 -13  -8 2495.16 1120.87
   1 -13  -7  359.95  383.44
  -1 -13   7   76.82  585.55
  -1 -13   7  264.15  194.87
  -1  13   7  563.70  235.82
   1  13  -7  314.60  326.90
   1 -13  -7  447.49  378.13
   1 -13  -6 1848.08  463.22
  -1 -13   6 1508.95  509.15
  -1 -13   6 1841.31  516.58
  -1  13   6 1792.66  457.19
   1  13  -6 2939.87  870.46
  -1  13   6 2773.53  936.41
   1 -13  -5  234.93  598.78
  -1 -13   5 1276.64  659.11
  -1 -13   5  888.02  450.25
  -1  13   5  553.94  430.90
   1  13  -5 1164.90  608.61
  -1  13   5 1191.65  613.54
  -1 -13   4 9285.33 3109.77
   1 -13  -410338.66 2263.34
  -1 -13   4 6554.55  510.38
  -1  13   4 7019.42 1213.17
   1  13  -4 7313.52 2031.57
  -1  13   4 6272.10 4204.01
  -1 -13   322800.61 1345.49
   1 -13  -324233.79 1315.08
  -1  13   324164.49  932.73
   1  13  -322837.73  923.95
  -1  13   323421.94 1801.32
   1  13  -323969.82 2142.94
  -1 -13   2 5850.50 1299.56
   1 -13  -2 7402.53 2006.49
  -1  13   2 5582.78 1550.13
   1  13  -2 7545.43  878.59
  -1  13   2 7171.21 1853.43
   1  13  -2 4949.73 2343.70
  -1 -13   139332.11 2170.04
   1 -13  -140943.42 1936.39
   1 -13  -135395.93 1143.14
  -1  13   138892.04 1885.50
   1  13  -138255.18 2257.19
  -1  13   138363.81 2070.32
   1  13  -138684.16 2935.85
  -1 -13   022945.27 1455.39
   1 -13   022438.52 2401.49
   1 -13   020695.96  493.91
  -1  13   018962.48  759.49
   1  13   019368.53 1261.17
   1  13   021050.50 2141.02
  -1  13   023689.86 3207.23
  -1 -13  -139294.35 1890.49
   1 -13   143749.50 1996.10
   1 -13   140175.78 1375.33
   1  13   140723.03 2862.23
   1  13   141129.54 2659.56
  -1  13  -143714.38 2256.70
  -1 -13  -224119.50 1521.28
   1 -13   227747.93 1616.29
   1 -13   222334.07  420.13
  -1  13  -223554.86  761.71
   1  13   222777.68 1391.26
   1  13   225734.29 1958.33
  -1  13  -225796.92 4464.06
  -1 -13  -3 4220.94  999.97
   1 -13   3 4585.18 1790.21
   1 -13   3 3957.17  500.09
  -1  13  -3 2814.55  761.70
   1  13   3 5145.62 1668.91
   1  13   3 5044.10 1223.07
  -1  13  -3 7683.93 2499.69
  -1 -13  -4 5262.81 2082.58
   1 -13   4 8362.24 2110.42
   1 -13   4 5841.33  450.69
  -1  13  -4 4443.44 1372.36
   1  13   4 4356.58 1092.31
   1  13   4 6679.36 2261.09
  -1  13  -4 5546.64 1704.78
  -1 -13  -5 5023.94 1154.81
   1 -13   5 6122.94 1511.69
   1 -13   5 4843.29  333.98
  -1  13  -5 3670.58 1030.88
   1  13   5 5330.42 1399.55
   1  13   5 5694.78 1851.73
  -1  13  -5 5276.24 2345.80
  -1 -13  -6 1176.86  396.00
   1 -13   6 1634.44  597.55
   1 -13   6 1211.10  377.76
  -1  13  -6 2381.85  639.27
   1  13   6 1633.63  744.10
  -1  13  -6 2599.86 1292.28
  -1 -13  -6 2038.11  589.96
  -1 -13  -7  485.72  397.97
   1 -13   7  670.26  453.82
   1 -13   7  -78.24  177.29
  -1  13  -7  -74.02  183.69
   1  13   7  699.52  622.35
  -1  13  -7  -25.12  889.56
  -1 -13  -7 -281.93  731.01
  -1 -13  -8 1705.15  636.09
   1 -13   8  746.14  912.03
   1 -13   8 1936.64  598.33
   1  13   8 2844.26  778.81
  -1  13  -8 2954.14 1317.42
  -1 -13  -8 2555.26  904.31
  -1 -13  -914619.72 1251.84
   1 -13   916298.57 1320.47
   1 -13   914930.54  901.11
   1  13   916304.10 1434.87
  -1  13  -912789.23 1239.29
  -1 -13  -912841.10 1250.09
  -1 -13 -10 7236.15 2340.91
   1 -13  10 9206.73 2577.56
   1 -13  10 6898.28  454.71
   1  13  10 7160.62 1956.91
  -1  13 -10 6930.50 1595.61
  -1 -13 -10 7619.52 2666.25
  -1 -13 -1114826.35 1825.27
   1 -13  1117128.98 2561.75
   1 -13  1116829.52 1017.98
   1  13  1116319.36 1785.21
  -1  13 -1117924.01 2798.43
  -1 -13 -1115157.76 2026.90
  -1 -13 -12 3886.23 1219.04
   1 -13  12 5519.57 2701.48
   1 -13  12 5477.53  441.75
   1  13  12 5376.19 1575.66
  -1  13 -12 4980.78 2087.67
  -1 -13 -12 4249.34 1231.57
  -1 -13 -13  600.61  299.48
   1 -13  13  539.72  211.77
   1  13  13  678.19  939.41
  -1  13 -13 3173.94 1090.52
  -1 -13 -13  767.14  876.09
  -1 -13 -14 1488.60  818.41
   1 -13  14 1305.07 1143.93
   1 -13  14  861.33  296.12
   1  13  14 1771.36  681.88
  -1  13 -14  -84.18  847.20
  -1 -13 -14 2183.62  781.35
   1 -13  15 1477.66  695.55
   1 -13  15 1288.03  521.27
   1  13  15 1245.61  620.74
  -1  13 -15 1620.61  694.06
  -1 -13 -15  845.69  416.25
   1 -13  16  701.75 1002.24
   1 -13  16  808.51  373.74
   1  13  16  862.71  868.83
  -1 -13 -16 1977.34  879.79
   1 -13  17  745.17  987.77
   1 -13  17  517.11  308.30
   1  13  17 1400.45  897.97
  -1  13 -17 1289.08 1042.70
  -1 -13 -17  419.02  688.14
   1 -13  18 1136.11  592.71
   1 -13  18  -39.38  301.70
   1  13  18 1305.40  880.74
  -1  13 -18  591.68  884.54
  -1 -13 -18 1087.62  726.17
   1 -13  19 1222.12 1005.69
   1 -13  19  685.80  361.90
   1  13  19  376.54  908.05
  -1  13 -19  362.77  632.87
  -1 -13 -19  824.23  776.68
   1 -13  20  881.72  428.34
   1 -13  20 1251.68  536.46
   1  13  20 3368.40 1084.33
  -1  13 -20  975.45  765.62
  -1 -13 -20  474.18  975.53
   1 -13  21 3629.92  985.37
   1 -13  21 2176.61  707.09
   1  13  21 1531.43  897.09
  -1  13 -21 4301.68 2291.13
  -1 -13 -21 2615.04 1085.13
   1 -13  22 -815.47  693.90
   1 -13  22  674.59  614.91
   1  13  22  196.41  676.02
  -1  13 -22  549.22  641.06
  -1 -13 -22   63.85  408.74
   1 -13  23 2903.86 1846.81
   1 -13  23 3215.42 1836.75
   1  13  23 4894.60  935.53
  -1  13 -23 5614.59 1656.07
  -1 -13 -23 4040.62 1754.71
   1 -13  24 4357.22 1508.53
   1 -13  24 1890.82  883.09
   1  13  24 1786.40  819.96
  -1  13 -24 1075.18  793.95
  -1 -13 -24 2780.22  833.77
   1 -13  25 1144.81  960.45
   1 -13  25  545.28  444.60
   1  13  25   13.23  572.90
  -1  13 -25 1722.27 1004.61
  -1 -13 -25 -331.72  606.53
   1 -13  26 1620.51  720.49
   1 -13  26   -9.97  427.35
   1  13  26 1331.99  520.24
  -1  13 -26 -105.11  931.63
  -1 -13 -26 -539.53  622.96
   1 -13  27 1328.56  866.01
   1 -13  27  267.32  232.79
   1 -13  28  565.30  819.80
   1 -13  28 1027.18  494.95
  -1 -14  28 1123.94  697.84
  -1 -14  27  212.61  969.16
  -1 -14  27  709.47  430.43
  -1 -14  26 1034.17  500.62
  -1 -14  26  552.54  458.05
   1 -14 -26  834.86  554.31
  -1 -14  25  510.02  639.53
  -1 -14  25  340.53  365.43
  -1  14  25  -53.40  563.02
   1  14 -25 2353.04 1171.62
   1 -14 -25  729.17  351.47
  -1 -14  24 1140.84  429.67
  -1 -14  24 -128.29  364.98
  -1  14  24  990.56  674.74
   1  14 -24 1342.11  500.46
   1 -14 -24 1167.70  635.03
  -1 -14  23  941.62  548.32
  -1 -14  23 1346.14  693.42
  -1  14  23 1371.95 1114.38
   1  14 -23 1640.82 1181.68
   1 -14 -23 1419.52 1145.84
  -1 -14  22 3926.82 1771.22
  -1 -14  22 1374.36  677.25
  -1  14  22 2876.66  907.36
   1  14 -22 1183.56 1283.68
   1 -14 -22 2987.58 1340.69
  -1 -14  21  484.85  565.02
  -1 -14  21  133.26  271.53
  -1  14  21  888.78  399.37
   1  14 -21 2351.44 1367.37
   1 -14 -21  -89.28  602.21
  -1 -14  20-1155.99  829.16
  -1 -14  20  341.97  303.20
  -1  14  20   44.36  316.98
   1  14 -20  543.99 1204.46
   1 -14 -20 2132.44  691.17
  -1 -14  19  483.87  609.71
  -1 -14  19  235.34  284.33
  -1  14  19 -704.47  629.95
   1  14 -19 1290.33 1036.55
   1 -14 -19  201.87  444.62
  -1 -14  18 1011.64 1065.59
  -1 -14  18  680.66  396.97
  -1  14  18  267.30  427.27
   1  14 -18  777.09 1033.49
   1 -14 -18 1089.76  526.73
  -1 -14  17 -456.36  890.60
  -1 -14  17  221.51  281.53
  -1  14  17 1077.64  538.47
   1  14 -17 1368.66  961.53
   1 -14 -17 1160.40  632.34
  -1 -14  16 1460.39  985.17
  -1 -14  16  153.43  199.81
  -1  14  16  755.32  315.27
   1  14 -16  840.01  322.94
   1 -14 -16  548.02  368.41
  -1 -14  15 1492.96  607.97
  -1 -14  15   95.00  182.90
  -1  14  15  363.19  275.13
   1  14 -15    9.63  993.70
   1 -14 -15  -94.25  569.35
  -1 -14  14  724.70  735.24
  -1 -14  14  369.47  131.25
  -1  14  14 -159.77  587.63
   1  14 -14  322.11  415.71
   1 -14 -14 -428.66  558.92
   1 -14 -13   91.44  572.49
  -1 -14  13    1.15  519.16
  -1 -14  13  131.81  113.73
  -1  14  13  -34.48  581.85
   1  14 -13 -331.54  888.75
   1 -14 -13 -111.58  626.95
   1 -14 -1213993.94 2767.59
  -1 -14  1213556.91 3921.76
  -1 -14  1214132.62  853.19
  -1  14  1214386.44 1038.50
   1  14 -1216347.64 4040.73
   1 -14 -1218291.54 1358.93
   1 -14 -11 1273.98  513.37
  -1 -14  11  550.92 1331.19
  -1  14  11  614.44  443.45
   1 -14 -11 1651.15  609.84
   1 -14 -10  533.82  444.86
  -1 -14  10 1566.75  853.63
  -1  14  10 -552.59  533.99
   1 -14 -10   95.69  684.90
   1 -14  -9 2389.36 1012.76
  -1 -14   9  802.23  510.81
  -1  14   9 3030.02  578.62
   1  14  -9 2185.15  506.87
   1 -14  -9  690.89  380.69
   1 -14  -824185.73 1704.01
  -1 -14   823336.83 2189.14
  -1  14   823628.40 2044.30
   1  14  -820660.22  747.85
   1 -14  -825228.39 2771.11
   1 -14  -7  623.83  432.68
  -1 -14   7 -749.15  821.22
  -1  14   7  401.95  356.76
   1  14  -7 1125.47  606.35
   1 -14  -7 1815.85  791.01
  -1 -14   6 7076.32 2365.31
   1 -14  -6 7646.39 2586.80
  -1  14   6 8808.25 2122.22
   1  14  -6 5877.93 1746.90
  -1  14   6 9638.94 2658.81
   1  14  -6 8800.16 2579.46
  -1 -14   5  763.43  547.12
   1 -14  -5  683.78  609.34
  -1  14   5  496.88  484.25
   1  14  -5  591.07  331.05
  -1  14   5 -303.53  834.53
   1  14  -5 -275.06 1081.29
  -1 -14   4  473.76  224.81
   1 -14  -4  965.40  468.07
  -1  14   4 1095.52  491.74
   1  14  -4   -7.99  476.77
  -1  14   4 -302.89  843.51
   1  14  -4  394.62 1211.69
  -1 -14   3  406.15  574.53
   1 -14  -3   57.48  296.51
  -1  14   3 -338.20  466.97
   1  14  -3  901.33  376.52
  -1  14   3  583.61  574.44
   1  14  -3 -155.83  969.41
  -1 -14   2  826.13  699.77
   1 -14  -2 2606.53  666.39
  -1  14   2  597.34  424.19
   1  14  -2  941.75  581.56
  -1  14   2 1851.76 1379.50
   1  14  -2 2039.32 1148.31
  -1 -14   1  448.28  721.53
  -1  14   1  339.16  167.61
   1  14  -1  574.51  413.68
   1  14  -1 1178.54  554.87
  -1  14   1 1005.25  673.33
  -1 -14   0  817.89  634.44
   1 -14   0  715.34  570.53
  -1  14   0  656.53  290.85
   1  14   0  -55.38  692.65
   1  14   0  213.27  573.77
  -1  14   0 2147.06  952.89
  -1 -14  -1 1351.14  844.27
   1 -14   1  541.26  685.34
  -1  14  -1 1162.47  323.08
   1  14   1 1075.97  511.87
   1  14   1 1232.90  950.75
  -1  14  -1 1321.26  770.64
  -1 -14  -2  724.94  322.70
   1 -14   2  249.86  450.25
  -1  14  -2   -8.49  298.87
   1  14   2  541.06  418.60
   1  14   2 3441.62 1358.63
  -1  14  -2  552.09  702.05
  -1 -14  -3   -7.27  643.50
   1 -14   3  862.10  766.81
  -1  14  -3  202.33  180.61
   1  14   3 -312.18  859.14
  -1  14  -3  426.68  500.71
  -1 -14  -4  648.30  353.22
   1 -14   4  565.18  542.12
  -1  14  -4  912.33  460.79
   1  14   4 1082.15  459.28
   1  14   4 -123.99  782.61
  -1  14  -4  317.30  914.15
  -1 -14  -5  565.72  586.99
   1 -14   5 2142.04  791.51
   1 -14   5 1619.52  429.32
   1  14   5 2042.65  657.84
   1  14   5 2881.58  960.95
  -1  14  -5 1944.89  612.74
  -1 -14  -6 -271.36  610.19
   1 -14   6  411.07  617.02
   1 -14   6  179.80  193.17
   1  14   6 -391.83  634.05
  -1 -14  -6  543.74  489.81
  -1 -14  -7 5280.67  964.86
   1 -14   7 6147.35 2328.20
   1 -14   7 4153.84  581.61
   1  14   7 3142.34  634.55
  -1  14  -7 3903.47 1186.35
  -1 -14  -7 5216.86 1438.95
  -1 -14  -8 1775.69  747.87
   1 -14   8 1187.75  449.89
   1 -14   8  528.52  244.90
   1  14   8  706.44  568.64
  -1  14  -8 1371.41  647.79
  -1 -14  -8 -532.77  712.05
  -1 -14  -9 1182.19  233.37
   1 -14   9 1320.08  730.29
   1 -14   9 1479.31  320.58
   1  14   9 1566.68  418.75
  -1  14  -9 1438.28  953.81
  -1 -14  -9 1273.43 1037.04
  -1 -14 -10 5750.23 2301.69
   1 -14  10 9424.56 2047.35
   1 -14  10 6311.51 1205.31
   1  14  10 7846.18 1856.75
  -1  14 -10 7800.53 2341.87
  -1 -14 -10 8305.88 2877.49
  -1 -14 -11 -157.33  473.24
   1 -14  11  690.97  949.89
   1 -14  11  126.18  135.81
   1  14  11  805.06  496.37
  -1  14 -11  361.75  870.03
  -1 -14 -11  355.65  563.99
  -1 -14 -1220138.98  970.99
   1 -14  1214969.53 3050.65
   1 -14  1217539.05  524.59
   1  14  1218933.15 3728.71
  -1  14 -1221947.70 4655.98
  -1 -14 -1218923.21 2425.90
  -1 -14 -13 2080.99  873.86
   1 -14  13 1116.06  780.57
   1 -14  13 1928.33  558.10
   1  14  13 1024.86  352.91
  -1  14 -13 4086.63 1227.95
  -1 -14 -13 4044.61 1450.77
   1 -14  14 1814.12  752.21
   1  14  14 3277.20  809.86
  -1  14 -14 4676.96 1231.63
  -1 -14 -14 3366.72 1261.06
   1 -14  15 -149.56  496.59
   1 -14  15  250.08  233.56
   1  14  15  506.10  671.35
  -1  14 -15 1420.66 1201.66
  -1 -14 -15  357.09  666.51
   1 -14  16  750.65  806.00
   1 -14  16  791.21  244.03
   1  14  16  655.88  808.30
  -1  14 -16 1427.22  872.63
  -1 -14 -16 1167.42 1163.42
   1 -14  17  727.13  868.75
   1 -14  17  137.31  309.32
   1  14  17  -32.49  738.52
  -1  14 -17 -528.98 1076.14
  -1 -14 -17  858.05  738.60
   1 -14  18 -332.37  775.03
   1 -14  18  313.89  336.07
   1  14  18 -189.13  813.29
  -1  14 -18  922.32 1021.54
  -1 -14 -18  520.51  743.38
   1 -14  19   62.61  641.58
   1 -14  19   78.50  332.74
   1  14  19  301.68  436.69
  -1  14 -19  272.46  546.52
  -1 -14 -19 -328.89  646.84
   1 -14  20  287.06  430.15
   1 -14  20 -122.16  288.01
   1  14  20 -184.79  795.91
  -1  14 -20 1340.67  630.21
  -1 -14 -20  644.11  768.81
   1 -14  21  348.76  796.11
   1 -14  21  105.40  215.35
   1  14  21 1109.75  539.07
  -1 -14 -21 1086.02  650.65
   1 -14  22  969.11 1009.63
   1 -14  22  787.76  352.56
   1  14  22  886.30  622.33
  -1  14 -22 1207.56  907.00
  -1 -14 -22  853.10  687.35
   1 -14  23  888.09  874.57
   1 -14  23 1352.01  597.19
   1  14  23 2503.24 1131.09
  -1  14 -23  -52.09  809.94
  -1 -14 -23 1861.85 1365.69
   1 -14  24 1952.67 1224.31
   1 -14  24  877.63  343.53
   1  14  24 2136.35  919.13
  -1  14 -24 1447.04 1013.54
  -1 -14 -24 2066.45  759.59
   1 -14  25 2179.34  905.99
   1 -14  25 1036.75  600.28
  -1 -14 -25 1340.46  545.47
   1 -14  26 1151.45  822.14
   1 -14  26 1495.80  505.84
   1 -14  27  283.89  205.04
  -1 -15  24  650.47  766.76
  -1  15  24  769.98  369.08
   1 -15 -24  369.74  272.76
  -1 -15  23  431.73  751.34
  -1  15  23 1686.54  910.40
   1  15 -23 1063.32  856.59
   1 -15 -23 1347.26  990.81
  -1 -15  22  519.60  583.14
  -1  15  22  278.02  301.45
   1  15 -22  606.19  572.74
   1 -15 -22  295.64  420.68
  -1 -15  21-1616.61  891.88
  -1  15  21 -391.52  583.27
   1  15 -21  731.19  529.05
   1 -15 -21  488.73  559.22
  -1 -15  20  893.60  525.17
  -1  15  20 2630.13  800.78
   1  15 -20  557.78 1309.45
   1 -15 -20 2724.67 1205.38
  -1 -15  19 1798.25 1273.79
  -1  15  19 1288.60  625.96
   1  15 -19  -20.75 1057.30
   1 -15 -19 1182.11  540.37
  -1 -15  18 1194.70  642.06
  -1  15  18 2495.00  722.90
   1  15 -18 1527.71 1613.36
   1 -15 -18 1897.86  933.77
  -1 -15  17  131.67  576.80
  -1  15  17 1347.99  639.71
   1  15 -17 1629.98  806.34
   1 -15 -17  523.17  528.41
  -1 -15  16 1862.48 1049.04
  -1  15  16 3077.68  740.66
   1  15 -16 1221.57  788.77
   1 -15 -16 4278.00 1037.59
  -1  15  15  743.82  343.19
   1  15 -15 1193.39  865.30
   1 -15 -15  759.46  521.58
  -1 -15  14  719.68 1095.12
  -1  15  14  791.58  263.86
   1 -15 -14 1091.13  688.95
  -1 -15  13 1014.74  510.21
  -1  15  13 1223.59  445.51
   1 -15 -13 1288.61  957.88
   1 -15 -12 4020.03 2177.35
  -1 -15  12 5987.67 1549.89
  -1  15  12 5128.04 1293.80
   1 -15 -12 7481.14 1204.03
   1 -15 -11  377.14  301.96
  -1 -15  11 2869.73  790.96
  -1  15  11 1240.60  719.01
   1 -15 -11 3618.99 1151.47
   1 -15 -10  348.00  220.22
  -1 -15  10 -188.04  902.55
  -1  15  10  363.50  430.79
   1 -15 -10  487.92  432.94
   1 -15  -911118.59 1204.46
  -1 -15   911003.82 3337.97
  -1  15   911623.36 2763.62
   1 -15  -914184.93 1527.92
   1 -15  -835118.44 2603.10
  -1 -15   830311.88 3615.88
  -1  15   828006.84 2010.54
   1  15  -832901.40 2409.31
   1 -15  -834550.18 3396.63
   1 -15  -7  262.70  399.57
  -1 -15   7-1065.06  837.95
  -1  15   7  679.70  525.92
   1 -15  -7 1953.96  661.64
   1 -15  -6 6640.78 2380.32
  -1 -15   6 8271.75 2740.51
  -1  15   6 7177.43 2309.80
   1  15  -6 5475.05 2012.11
   1  15  -6 4931.26 1359.28
  -1 -15   511347.46 3820.26
   1 -15  -512765.94 1854.90
  -1  15   512422.23 1072.12
   1  15  -5 8901.17 2424.26
  -1  15   515104.06 4941.41
   1  15  -514574.36 2916.36
  -1 -15   418825.76 1681.05
   1 -15  -420698.04 1990.80
  -1  15   417237.18 1702.92
   1  15  -416484.92 2134.03
  -1  15   417377.48 1895.01
   1  15  -418638.20 4227.05
   1 -15  -3  444.96  247.97
  -1 -15   3 1069.06 1030.27
  -1  15   3  628.74  426.44
   1  15  -3  257.93  231.95
  -1  15   3  934.98 1211.22
   1  15  -3  281.27  668.63
  -1 -15   2  557.35  733.34
   1 -15  -2  905.36  546.22
  -1  15   2  101.11  180.36
   1  15  -2  535.46  403.42
  -1  15   2  144.03  636.15
   1  15  -2  119.65  690.80
  -1 -15   1 3028.65 1059.23
   1 -15  -1 1854.05  954.10
  -1  15   1 2214.14  508.13
   1  15  -1 2514.21  862.46
   1  15  -1  716.88 1222.40
  -1  15   1 3363.11 1821.60
  -1 -15   0  488.02  450.21
   1 -15   0 1374.25  640.95
  -1  15   0  286.62  241.43
   1  15   0  656.42  555.52
   1  15   0 1274.39  512.60
  -1  15   0 2008.54 1527.70
  -1 -15  -1 1689.24  764.95
   1 -15   1  601.02  532.10
  -1  15  -1  561.88  287.14
   1  15   1 1962.68  825.25
   1  15   1 1721.11 1747.59
  -1  15  -1 1309.57 1041.49
  -1 -15  -2 1630.83  750.79
   1 -15   2 3195.44 1173.23
   1  15   2  710.07  902.50
   1  15   2 1748.70 1007.86
  -1  15  -2 1364.73 1118.16
  -1 -15  -3  492.50  668.61
   1 -15   3  825.22  440.12
   1  15   3  925.83  631.82
   1  15   3 1103.29  938.43
  -1  15  -3 1349.82  971.68
  -1 -15  -4 5818.16  886.04
   1 -15   4 5460.12 1124.66
   1  15   4 4308.26  992.06
   1  15   4 5146.95 1299.53
  -1  15  -4 8319.45 2154.46
  -1 -15  -5 1374.03  911.82
   1 -15   5 1047.56  285.93
   1  15   5 1263.02  551.14
  -1  15  -5 1553.17 1099.55
  -1 -15  -624232.14 1919.17
   1 -15   625069.15 2590.28
   1  15   621440.47 3513.72
  -1  15  -621865.16 1788.06
  -1 -15  -623806.32 2590.29
  -1 -15  -714661.22 1715.61
   1 -15   714659.59 4710.26
   1  15   711425.99 2568.81
  -1  15  -719445.89 4851.85
  -1 -15  -721880.70 2445.79
  -1 -15  -829641.83 1830.73
   1 -15   830198.04 1294.67
   1  15   830178.07 1719.34
  -1  15  -828890.57 1845.31
  -1 -15  -835520.47 1806.97
  -1 -15  -9  724.29  738.04
   1 -15   9  795.22  854.97
   1  15   9  606.93  496.44
  -1  15  -9  871.52  941.52
  -1 -15  -9 1273.49  425.68
  -1 -15 -10 3631.27 1371.61
   1 -15  10 5643.41 1823.37
   1  15  10 5323.28 1530.07
  -1  15 -10 7057.56 2373.54
  -1 -15 -10 6948.22 2416.15
  -1 -15 -11 4652.88 1499.17
   1 -15  11 4873.61 1567.04
   1  15  11 4860.73 1173.57
  -1  15 -11 6191.23 1544.92
  -1 -15 -11 5277.64 1524.41
  -1 -15 -12 8698.16 2812.28
   1 -15  12 9578.20 2105.30
   1  15  12 9945.90 2191.95
  -1  15 -1212371.88 2878.28
  -1 -15 -1212220.87 1826.08
   1 -15  13 -635.79  796.19
   1  15  13 1465.52  798.07
  -1  15 -13  362.29  587.69
  -1 -15 -13 -341.97  476.38
   1 -15  14  -82.75  877.17
   1  15  14 1266.40  446.40
  -1  15 -14 2747.55 1003.23
  -1 -15 -14  -34.45  755.00
   1  15  15 -213.37  718.73
  -1  15 -15  798.90  514.76
  -1 -15 -15  698.93  576.55
   1 -15  16 1275.94 1161.08
   1  15  16  848.65  477.55
  -1 -15 -16 1779.17 1258.52
   1 -15  17 -238.47  831.23
   1  15  17 1847.42  631.40
  -1  15 -17 3312.05 1244.55
  -1 -15 -17  422.37  680.45
   1 -15  18  575.49  490.86
   1  15  18 1001.45  767.29
  -1 -15 -18  693.51  598.94
   1 -15  19  535.54  516.43
   1  15  19 1315.44  904.41
  -1  15 -19  983.31  879.04
  -1 -15 -19  366.54  646.31
   1 -15  20 2575.83 1921.53
   1  15  20 2709.22  816.79
  -1  15 -20 1855.31 1971.26
  -1 -15 -20 3585.73 1587.42
   1 -15  21  268.92 1048.92
   1 -15  21  608.46  376.13
   1  15  21 1054.85  478.41
  -1  15 -21 1533.16  449.54
  -1 -15 -21  158.70  381.74
   1 -15  22  492.94  591.90
   1  15  22 1036.67  660.51
  -1  15 -22 1110.04  976.36
  -1 -15 -22 1620.97 1045.84
   1 -15  23 1383.83 1093.18
   1  15  23 1169.49  771.81
  -1 -15 -23  459.14  403.06
   1 -16 -23  535.48  561.67
  -1 -16  22 1914.39 1159.21
  -1  16  22 1394.25  649.34
   1 -16 -22 1282.79  717.01
  -1 -16  21  666.12  604.10
  -1  16  21 1313.83  610.86
   1 -16 -21 -613.88  633.76
  -1 -16  20 1125.02 1179.14
  -1  16  20  879.28  690.63
   1  16 -20 1911.40  962.66
   1 -16 -20  918.84 1002.56
  -1 -16  19  -44.79  854.15
  -1  16  19  935.21  615.72
   1 -16 -19  571.79  740.38
  -1 -16  18  593.37 1039.61
  -1  16  18  682.76  453.47
   1  16 -18  734.83  659.12
   1 -16 -18  535.29  611.68
  -1 -16  17 1615.62  740.05
  -1  16  17   88.79  281.08
   1  16 -17 -310.16  968.02
   1 -16 -17  943.94  636.46
  -1 -16  16 -185.93  988.06
  -1  16  16  515.59  395.20
   1 -16 -16  361.51  656.14
  -1  16  15 3657.93  757.07
   1 -16 -15 5466.06 2221.80
  -1 -16  14 4015.59 1639.91
  -1  16  14 3517.31 1004.51
   1 -16 -14 2983.89 1253.82
  -1 -16  13 1187.71  882.38
  -1  16  13 1693.00  813.30
   1 -16 -13 2621.85  916.86
  -1 -16  12 1004.80  560.42
  -1  16  12  368.17  487.21
   1 -16 -12  472.32  298.74
   1 -16 -11  334.48  290.91
  -1 -16  11  205.24  773.96
  -1  16  11  585.73  365.96
   1 -16 -11 1072.49  729.62
   1 -16 -10 1173.73 1196.87
  -1 -16  10 1495.50 1308.61
  -1  16  10 2147.71  761.35
   1  16 -10 3515.62 1402.65
   1 -16 -10  113.08  522.37
   1 -16  -9 6220.32 2474.53
  -1 -16   9 6240.25 1792.10
  -1  16   9 5348.04 1217.25
   1  16  -9 6171.24 1945.33
   1 -16  -9 5208.88 2353.20
   1 -16  -8 2095.58 1260.03
  -1 -16   8 2134.66 1259.55
  -1  16   8 1745.05  336.58
   1  16  -8  729.49  653.08
   1 -16  -8  959.34  519.58
   1 -16  -7 4033.51 1344.19
  -1 -16   7 3881.09 1903.63
  -1  16   7 5215.38 1418.31
   1  16  -7 7234.34 1470.37
   1 -16  -7 5241.34 1258.04
  -1 -16   6 -423.33  783.49
  -1  16   6 -131.70  491.96
   1  16  -6  967.69  792.95
   1 -16  -6 1610.31  688.06
   1 -16  -5 2068.09 1058.80
  -1 -16   5  812.88  632.51
  -1  16   5 1028.59  520.02
  -1  16   5 1905.08  694.32
   1  16  -5 1675.12  724.47
  -1 -16   4  257.25  754.76
   1 -16  -4  342.55  322.48
  -1  16   4 1097.93  290.43
  -1  16   4  119.14  506.51
   1  16  -4  553.01  964.62
  -1 -16   3 1214.36  645.05
   1 -16  -3 1624.95  645.21
  -1  16   3 1484.94  463.05
   1  16  -3 1033.68  567.31
  -1  16   3 3872.03 1734.65
   1  16  -3 2167.40 1068.48
  -1 -16   2 -284.68  728.36
   1 -16  -2 -213.51  647.74
  -1  16   2  350.60  208.45
   1  16  -2  260.07  317.87
  -1  16   2 1575.53 1617.36
   1  16  -2    5.46  536.84
  -1 -16   1  -98.64  738.38
   1 -16  -1  448.30  261.72
   1  16  -1  378.78  321.81
  -1  16   1  617.02 1205.66
   1  16  -1 2068.18 1122.48
  -1 -16   0 1931.81 1296.56
   1 -16   0 1254.43  542.28
   1  16   0  933.35  523.73
   1  16   0  316.42 1081.51
  -1  16   0 1023.73 1060.49
  -1 -16  -1 2303.35  841.72
   1 -16   1 2517.95  760.70
   1  16   1 1178.75  525.77
   1  16   1 1391.05  559.56
  -1  16  -1 2755.93 1112.71
  -1 -16  -2  527.65  707.51
   1 -16   2 1193.71  498.89
   1  16   2  317.17  265.51
   1  16   2 2756.37 1130.06
  -1  16  -2  -81.84 1012.71
  -1 -16  -3  431.96  379.11
   1 -16   3 1155.80  748.81
   1  16   3  506.74  388.53
   1  16   3  826.79  824.04
  -1  16  -3 -155.75  998.93
  -1 -16  -4 1606.20 1004.73
   1 -16   4   -9.95  542.17
   1  16   4 -272.97  594.56
   1  16   4  206.43  526.84
  -1  16  -4 1953.06 1055.93
  -1 -16  -5  850.66  428.21
   1 -16   5  616.73  522.52
   1  16   5 1198.95  460.73
  -1  16  -5  424.28  599.21
  -1 -16  -5  556.45  512.36
  -1 -16  -6  762.78  771.06
   1 -16   6  568.47  665.78
   1  16   6  738.00  355.61
  -1  16  -6  313.46  679.39
  -1 -16  -6 2035.82  866.19
  -1 -16  -7 3453.81 1294.94
   1 -16   7 2488.33  600.30
   1  16   7 3861.47 1128.24
  -1  16  -7 2179.04 1472.29
  -1 -16  -7 2728.91 1580.70
  -1 -16  -8 4450.05 1479.28
   1 -16   8 3598.27 1061.31
   1  16   8 4657.08 1113.39
  -1  16  -8 3636.40 1691.81
  -1 -16  -8 2040.77 1220.10
  -1 -16  -9  976.72  442.42
   1 -16   9 2398.86  917.42
   1  16   9 1334.34  586.57
  -1  16  -9 1636.14  648.59
  -1 -16  -9 2201.39  946.05
  -1 -16 -10  249.19  625.05
   1 -16  10 1159.00  466.77
   1  16  10  813.59  607.21
  -1  16 -10 1773.29  835.21
  -1 -16 -10  950.77  851.95
  -1 -16 -11 3424.18 1710.04
   1 -16  11 2896.85  914.75
   1  16  11 3933.34  766.62
  -1  16 -11 6844.52 1436.23
  -1 -16 -11 4317.89 1379.51
   1 -16  12  609.10  955.75
   1  16  12  670.18  683.65
  -1  16 -12  496.42  843.27
  -1 -16 -12 1182.29  654.04
   1 -16  13  794.71  687.79
   1  16  13 -459.98  733.22
  -1  16 -13 3134.22 1541.64
  -1 -16 -13  424.96  663.67
   1  16  14 1255.68  663.93
  -1  16 -14  650.17  541.10
  -1 -16 -14 1048.97  855.93
   1  16  15 4541.86 1108.65
  -1  16 -15 2456.37  884.99
  -1 -16 -15 4251.69 1556.60
   1 -16  16 2583.51 1409.41
   1  16  16 3146.91  763.87
  -1  16 -16 7172.32 1871.58
  -1 -16 -16 3311.86 1582.60
   1 -16  17 1591.32 1036.39
   1  16  17 3677.50  915.41
  -1  16 -17 4164.53 1045.94
  -1 -16 -17 2942.72 1242.10
   1 -16  18 1022.02  890.86
   1  16  18  717.60  502.83
  -1 -16 -18  831.87  624.05
   1 -16  19  549.06  916.49
   1  16  19  651.75  529.51
  -1  16 -19 1880.76  753.85
  -1 -16 -19 1409.20  520.57
   1 -16  2010258.28 5759.15
   1  16  2012356.29 3842.88
  -1  16 -2012957.87 4938.11
  -1 -16 -2017822.44 2361.86
   1  16  21 1080.39  388.45
  -1 -16 -21 1079.61  654.16
  -1  17  21  833.13  459.56
  -1  17  20 1181.95  487.30
   1 -17 -20  -36.09  559.98
  -1 -17  19  699.87  656.03
  -1  17  19  408.27  516.29
   1 -17 -19  465.23  749.65
  -1 -17  18 1316.50 1740.97
  -1  17  18 1270.55  591.97
   1  17 -18  -82.36  968.44
   1 -17 -18  -38.62  649.93
  -1 -17  17 1672.62  785.66
  -1  17  17  806.78  634.77
   1 -17 -17 1776.11 1073.47
  -1  17  16 1368.05  633.64
   1 -17 -16  231.64  692.64
  -1  17  15  360.51  501.65
   1 -17 -15  994.98  822.46
  -1 -17  14  331.73  647.35
  -1  17  14  356.90  576.41
   1 -17 -14  412.50  739.54
  -1 -17  13  497.17  709.97
  -1  17  13  753.22  416.92
   1  17 -13 1478.98  807.60
   1 -17 -13  191.37  859.81
  -1 -17  12  716.82  869.34
  -1  17  12 1833.87  713.26
   1  17 -12 2603.63  830.90
   1 -17 -12 2473.54 1091.62
  -1 -17  11 4887.77 1990.31
  -1  17  11 5850.11 1383.37
   1  17 -11 8951.39 2381.77
   1 -17 -11 7474.82 2517.69
   1 -17 -10  631.42  361.05
  -1 -17  10  615.70  632.34
  -1  17  10 1183.07  398.21
   1  17 -10 1097.99  814.04
   1 -17 -10  564.61  475.52
   1 -17  -9  413.51  477.20
  -1 -17   9 1335.42  978.09
  -1  17   9 1281.59  466.59
   1  17  -9 1101.70  836.79
   1 -17  -9  582.84  370.87
   1 -17  -8 1290.98  717.73
  -1 -17   8  620.19  634.36
  -1  17   8  466.50  347.06
   1  17  -8 1109.17 1063.58
   1 -17  -8  307.60  737.89
   1 -17  -7 2413.60  909.80
  -1 -17   7 4119.96 1330.18
  -1  17   7 3341.91  912.95
   1  17  -7 3708.11  990.87
   1 -17  -7 2942.15 1476.95
  -1 -17   6  650.10  945.78
   1 -17  -6  -95.77  608.28
  -1  17   6  308.27  239.57
   1  17  -6  447.82  687.83
  -1 -17   5 1663.91 1021.54
   1 -17  -5 1196.80  756.00
  -1  17   5  529.98  357.37
   1  17  -5 1889.67  868.93
   1 -17  -4  601.22  665.17
  -1 -17   4 1437.77  950.27
  -1  17   4 1214.74  569.46
   1  17  -4 1069.69  878.95
   1 -17  -3 1053.09  774.04
  -1 -17   3 1842.46 1288.96
  -1  17   3  869.67  729.39
   1  17  -3 1687.97 1245.75
  -1 -17   2  315.59  700.88
   1 -17  -2 4573.19 2005.10
  -1  17   2  365.85  613.34
   1  17  -2   93.04  787.23
  -1 -17   1  712.95  831.60
   1 -17  -1  571.34  863.84
   1  17  -1 1073.48  684.67
  -1  17   1 1921.24  805.89
  -1 -17   0  858.51  779.53
[truncated: 2,233,478 more chars]
